# Supplementary material for: Facilitators and barriers to COVID-19 vaccination among healthcare workers and the general population in Guinea
Source: Research Square preprint supplement (doi:10.21203/rs.3.rs-1659297/v1), 2022-05-27
Supplement: Supplementary file 1 [file 3030a5027d9e2c132353959c.xlsx]

## Sheet: cvhcw22
					Facilitators and barriers to COVID-19 vaccination among healthcare workers and the general population in Guinea.
					Almamy Amara TOURE ,2, Fodé Amara TRAORE3,4, Gnoume CAMARA3, Aboubacar Sidiki MAGASSOUBA5,Ibrahima BARRY1, Mohamed Lamine KOUROUMA4,Younoussa SYLLA1, Naby Yaya CONTE1,5, Diao CISSE5, Nafissatou DIOUBATÉ1, Sidikiba SIDIBE6,7, Abdoul Habib BEAVOGUI1, Alexandre DELAMOU5,6.
					Authors' affiliations 1 Maferinyah National Centre for Training and Research in Rural Health (CNFRSR), Forécariah, Guinea. 2 Kofi Annan University of Guinea.Conakry,Guinea. 3 Centre Hospitalo-Universitaire de Conakry,Service de maladies infectieuses. 4 Agence Nationale de Sécurité Sanitaire,Conakry,Guinée. 5 Centre MURAZ, Burkina Faso.6 Department of Public Health, Faculty of Sciences and Health …
today	patient_informations/age	patient_informations/sexe	patient_informations/statut_matrimonial	patient_informations/commune	patient_informations/niveau_education	patient_informations/Profession	patient_informations/Nbp_menage	patient_informations/Nbre_pers_plusde18ans	patient_informations/duree_sejour	patient_informations/grossesse	Antecedents/diabete	Antecedents/hta	Antecedents/surpoids	Antecedents/asthme	Antecedents/autreallergie	Antecedents/autremalchr	Information_vaccination/con_vaccin	Information_vaccination/types_vaccin	Information_vaccination/mapi	Information_vaccination/immun_individ	Information_vaccination/immun_collect	source_infos_COVID-19/cherch_info_COVID-19	source_infos_COVID-19/source_infos/1	source_infos_COVID-19/source_infos/2	source_infos_COVID-19/source_infos/3	source_infos_COVID-19/source_infos/4	source_infos_COVID-19/source_infos/5	source_infos_COVID-19/source_infos/6	source_infos_COVID-19/source_infos/7	source_infos_COVID-19/source_infos/8	source_infos_COVID-19/source_infos/9	perception_peur_COVID-19/probable_attrap_COVID-19	perception_peur_COVID-19/arisque_COVID-19	perception_peur_COVID-19/possible_attrap_COVID-19	perception_peur_COVID-19/pense_COVID-19_grav	perception_peur_COVID-19/pense_COVID_19_cons_neg	perception_peur_COVID-19/pense_COVID-19_nuisibl	perception_peur_COVID-19/trepeur_COVID_19	perception_peur_COVID-19/penser_COVID_19_malaise	perception_peur_COVID-19/mains_moites_pense_COVID_19	perception_peur_COVID-19/peur_mourir_COVID-19	perception_peur_COVID-19/regarde_nouvel_COVID-19_rend_nerveu	perception_peur_COVID-19/nepeut_dormir_COVID-19	perception_peur_COVID-19/acc_rythmecard_palpitation_COVID-19	attitudes_croyance/prendr_vaccin_COVID-19_benefic	attitudes_croyance/prendr_vaccin_COVID-19_renf_immun	attitudes_croyance/vaccins_reserv_grpes_pers	attitudes_croyance/vaccins_tropcher	attitudes_croyance/procedur_avoirvacc_laborieu
2021-08-11	25	2	1	11	5	stagiaire	3	2	2	2	2	2	2	2	2	2	1	1	2	2	2	1	1	1	1	0	0	0	0	0	0	4	5	5	4	4	2	3	3	2	2	4	2	2	5	5	5	2	3
2021-07-14	25	1	2	11	5	infirmier	1	1	2		2	2	2	2	2	2	1	1	1	2	2	1	0	1	0	1	1	0	0	0	0	3	3	3	5	5	5	5	1	1	5	1	1	1	5	1	1	1	1
2021-08-11	31	1	2	11	5	stagiaire	2	2	2		2	2	1	2	2	2	1	1	2	2	2	1	0	1	0	1	1	0	0	0	0	3	3	4	3	3	3	4	2	1	1	1	1	2	5	5	2	1	3
2021-08-11	24	1	2	11	5	stagiaire	1	1	2		2	2	2	2	1	2	1	1	1	1	2	1	0	1	0	1	1	0	0	0	0	5	5	5	5	5	5	5	5	4	5	5	3	3	5	5	2	1	5
2021-08-11	29	2	1	11	5	stagiaire	6	5	2	2	2	2	2	2	2	2	1	1	1	1	2	1	0	1	0	1	1	0	0	0	0	4	4	4	4	4	4	2	2	2	2	2	2	2	4	5	1	1	1
2021-07-14	22	1	2	11	5	infirmier	5	1	2		2	2	2	2	1	2	1	1	1	2	2	1	0	0	1	1	1	0	0	0	0	3	5	5	4	4	3	5	3	5	5	5	3	3	4	4	2	2	5
2021-07-14	26	2	1	11	5	infirmier	3	1	2	2	2	2	2	2	2	2	1	1	1	1	2	1	0	0	1	0	1	1	0	0	0	5	2	2	5	5	4	4	4	2	4	2	4	4	4	4	2	2	2
2021-08-11	22	2	1	11	5	infirmier	6	4	2	2	2	2	2	2	2	2	1	1	1	2	2	1	0	1	0	0	1	0	1	0	0	4	4	4	5	1	5	3	1	1	1	2	4	2	5	5	1	1	4
2021-07-09	28	1	2	12	5	infirmier	22	10	2		2	2	2	2	2	2	2	2	1	2	2	2	0	0	0	0	0	0	0	0	0	4	1	4	4	4	4	5	5	2	5	5	4	5	5	5	4	2	4
2021-07-09	27	2	2	12	5	infirmier	20	13	2	2	2	2	2	2	2	2	1	1	2	2	2	2	0	0	0	0	0	0	0	0	0	1	3	4	4	4	4	5	5	2	5	5	5	4	4	5	2	2	2
2021-08-11	26	2	2	11	5	stagiaire	4	3	2	2	2	2	2	2	2	2	1	2	2	2	2	2	0	0	0	0	0	0	0	0	0	4	3	4	4	5	5	3	2	1	2	2	2	2	4	4	1	1	1
2021-08-11	30	2	1	11	5	stagiaire	5	3	2	2	2	2	2	2	2	2	1	1	1	2	2	2	0	0	0	0	0	0	0	0	0	4	4	4	3	3	3	4	4	4	2	2	2	2	5	5	1	1	3
2021-08-11	23	2	1	11	5	stagiaire	4	2	2	2	2	2	2	2	2	2	1	1	1	1	1	2	0	0	0	0	0	0	0	0	0	4	5	4	3	5	2	1	4	5	2	5	5	1	3	3	3	2	4
2021-08-23	25	1	2	11	5	infirmier	5	3	2		2	2	1	2	2	2	1	1	1	1	2	2	0	0	0	0	0	0	0	0	0	1	5	1	4	5	5	5	5	5	1	5	1	1	5	5	3	2	5
2021-07-14	35	2	1	11	5	infirmier	8	5	2	2	2	2	2	2	1	2	1	1	2	2	2	1	1	1	1	0	0	0	0	0	0	5	5	5	5	3	4	4	4	4	4	2	4	4	4	5	2	2	1
2021-08-11	27	1	2	11	5	stagiaire	7	3	2		2	2	2	2	2	2	1	1	2	2	2	2	0	0	0	0	0	0	0	0	0	3	2	4	4	4	3	2	2	1	1	1	1	1	5	4	1	1	1
2021-08-11	32	2	1	11	5	stagiaire	4	2	2	2	2	2	2	2	2	2	1	1	1	2	2	2	0	0	0	0	0	0	0	0	0	4	4	4	4	5	3	4	3	2	1	1	1	1	5	4	2	1	1
2021-07-17	25	2	1	11	5	infirmier	3	2	2	2	2	2	2	2	2	2	1	1	1	1	2	1	0	1	1	1	0	0	0	0	0	3	4	4	4	3	4	4	4	4	4	3	3	3	3	4	4	3	1
2021-07-17	34	2	1	11	5	infirmier	3	2	2	2	2	2	2	2	2	2	1	1	1	2	2	1	1	1	0	0	1	0	0	0	0	3	4	3	4	4	4	4	4	4	4	4	4	4	5	5	1	1	1
2021-07-17	32	2	1	11	5	infirmier	7	2	2	2	2	2	2	2	2	2	1	1	1	1	1	1	1	1	0	0	1	0	0	0	0	5	5	3	4	4	4	4	4	4	4	4	4	4	4	4	2	2	5
2021-07-17	33	2	1	11	5	infirmier	10	2	2	2	2	2	2	2	2	2	1	1	1	1	2	1	1	1	0	0	1	0	0	0	0	5	5	5	5	4	4	4	4	4	4	4	4	4	5	5	4	4	4
2021-07-17	29	2	1	11	5	infirmier	4	3	2	2	2	2	2	2	2	2	2	2	2	2	2	1	1	0	1	0	1	0	0	0	0	5	5	5	5	4	4	5	5	5	5	5	3	2	5	5	2	2	3
2021-07-17	24	2	2	11	5	infirmier	10	4	2	2	2	2	1	2	2	2	1	1	2	2	2	1	0	1	1	0	1	0	0	0	0	3	2	3	5	5	5	5	3	5	5	5	5	5	5	5	5	5	5
2021-08-11	28	1	2	11	5	stagiaire	5	5	2		2	2	2	2	2	2	1	1	1	1	2	1	0	1	1	0	1	0	0	0	0	4	4	4	4	4	4	5	2	4	3	4	4	4	4	4	4	4	2
2021-07-14	33	2	2	11	5	infirmier	5	5	2	2	2	2	2	2	2	2	1	1	1	1	1	1	0	1	0	1	1	0	0	0	0	1	4	1	4	4	4	4	4	4	4	4	4	4	4	4	1	1	4
2021-07-14	24	2	1	11	5	infirmier	12	5	2	2	2	2	2	2	2	1	1	1	1	1	1	1	0	1	0	1	1	0	0	0	0	2	4	2	4	4	4	4	4	4	4	4	1	3	5	5	1	1	4
2021-07-17	26	2	1	11	5	infirmier	8	3	2	2	2	1	2	2	2	2	1	1	2	1	1	1	0	1	0	1	1	0	0	0	0	3	3	3	2	2	2	4	5	2	4	3	2	4	4	4	4	2	4
2021-07-14	34	2	1	11	5	infirmier	9	2	2	2	2	2	2	2	2	2	1	1	1	1	1	1	0	0	1	1	1	0	0	0	0	1	4	4	4	4	4	4	4	4	4	4	4	4	4	4	2	4	4
2021-08-11	24	1	2	11	5	stagiaire	6	5	2		2	2	2	2	2	2	1	1	1	2	2	1	0	0	0	1	1	1	0	0	0	1	1	1	5	1	5	5	5	4	1	4	1	5	5	5	1	1	1
2021-08-11	30	2	1	11	5	stagiaire	5	3	2	2	2	2	2	2	2	2	1	1	1	1	1	1	0	1	0	0	1	0	1	0	0	4	4	4	2	2	4	4	2	2	1	1	1	1	5	5	1	1	3
2021-07-05	21	1	2	12	4	medecin	7	5	2		2	2	2	2	2	2	2	2	2	1	1	2	0	0	0	0	0	0	0	0	0	5	1	4	5	5	5	5	5	5	5	5	2	2	5	5	4	5	4
2021-07-07	22	2	1	12	5	infirmier	13	5	2	2	2	2	2	2	2	1	1	2	1	2	2	2	0	0	0	0	0	0	0	0	0	1	1	4	5	5	1	5	5	5	5	4	5	2	4	5	2	1	1
2021-07-12	30	2	3	11	5	infirmier	1	1	2	2	2	2	1	2	2	2	1	1	1	2	2	2	0	0	0	0	0	0	0	0	0	4	4	1	5	5	5	5	5	4	5	5	5	3	5	5	1	1	1
2021-07-14	29	2	2	11	5	infirmier	6	2	2	2	2	2	2	2	2	2	1	1	1	2	2	2	0	0	0	0	0	0	0	0	0	3	3	5	1	5	5	5	5	5	5	3	3	5	4	5	5	1	3
2021-07-17	29	2	2	11	5	infirmier	1	1	2	2	2	2	2	2	2	2	1	1	2	1	1	2	0	0	0	0	0	0	0	0	0	4	4	4	5	3	3	3	5	4	3	4	3	3	4	3	1	1	1
2021-07-17	29	2	1	11	5	infirmier	6	2	1	2	2	2	1	1	2	2	1	1	2	2	2	2	0	0	0	0	0	0	0	0	0	3	3	3	5	1	5	5	5	5	5	3	3	5	4	5	5	5	1
2021-07-17	29	2	1	11	5	infirmier	6	2	2	2	2	2	1	2	2	2	2	1	1	2	2	2	0	0	0	0	0	0	0	0	0	4	3	4	5	2	2	4	4	5	4	4	4	4	4	4	3	2	5
2021-08-11	25	2	1	11	5	stagiaire	3	2	2	2	2	2	2	2	2	2	1	1	2	2	2	2	0	0	0	0	0	0	0	0	0	4	3	3	3	4	3	4	2	2	4	3	2	2	4	3	4	1	1
2021-08-11	29	2	1	11	5	stagiaire	3	2	2	2	2	2	1	2	2	2	1	1	2	2	2	2	0	0	0	0	0	0	0	0	0	4	3	3	5	5	2	3	3	1	5	4	2	2	4	4	1	1	1
2021-08-11	34	2	1	11	5	stagiaire	6	4	2	2	2	2	1	2	2	2	2	2	2	2	2	2	0	0	0	0	0	0	0	0	0	4	3	4	4	1	1	1	1	1	2	2	1	1	4	4	1	1	1
2021-08-11	23	2	3	11	5	stagiaire	7	5	2	2	2	2	2	2	2	2	1	1	1	2	2	2	0	0	0	0	0	0	0	0	0	1	1	1	4	4	4	4	4	1	4	1	3	2	4	4	1	1	4
2021-08-11	27	1	2	11	5	stagiaire	4	4	2		2	2	1	2	2	2	1	1	1	2	2	2	0	0	0	0	0	0	0	0	0	4	3	4	2	2	2	4	3	2	1	1	1	1	5	5	2	1	1
2021-08-26	28	2	2	11	5	infirmier	5	2	2	2	2	2	1	2	2	2	1	1	1	1	2	2	0	0	0	0	0	0	0	0	0	4	4	3	4	4	4	4	4	2	2	2	4	2	5	2	2	2	2
2021-07-15	29	2	1	11	5	infirmier	4	2	2	2	2	2	2	2	2	2	1	1	1	1	2	1	0	1	0	0	1	0	0	1	0	5	4	2	5	2	5	4	2	2	2	2	2	4	5	4	2	2	2
2021-08-11	28	2	1	11	5	infirmier	3	2	2	2	2	2	2	2	2	2	1	1	1	1	1	1	1	1	1	0	0	0	0	0	0	1	1	2	4	4	4	4	4	4	4	4	4	3	4	4	4	4	4
2021-08-10	28	2	1	11	5	infirmier	2	2	2	1	2	2	2	2	2	2	1	1	1	2	2	1	0	1	1	1	0	0	0	0	0	5	5	5	5	2	5	5	2	2	5	5	3	5	5	5	1	1	1
2021-07-17	33	2	3	11	5	infirmier	12	5	2	2	2	2	2	2	2	2	1	2	2	2	2	1	1	1	0	0	1	0	0	0	0	4	3	5	5	5	2	2	3	4	5	5	4	2	5	5	2	2	4
2021-07-15	25	2	1	11	5	infirmier	7	6	2	2	2	2	1	2	2	2	1	1	2	2	2	1	1	0	1	0	1	0	0	0	0	2	2	2	3	5	5	4	5	4	3	5	3	4	5	4	4	1	4
2021-07-15	26	2	1	11	5	sage femme	7	2	1	2	2	1	2	2	2	2	1	1	1	1	2	1	1	0	1	0	1	0	0	0	0	2	2	4	4	5	4	2	3	4	5	4	2	4	5	4	3	1	3
2021-08-10	32	2	1	11	5	infirmier	4	2	2	2	2	2	2	2	1	2	1	1	1	2	2	1	1	0	1	0	1	0	0	0	0	4	4	4	4	3	4	4	4	5	4	4	4	4	4	4	1	1	1
2021-07-17	30	2	1	11	5	infirmier	4	2	2	1	2	2	1	2	2	2	1	1	1	1	2	1	0	1	1	0	1	0	0	0	0	5	5	4	5	4	4	4	5	4	4	5	5	3	4	5	1	1	1
2021-07-12	29	1	1	11	5	infirmier	3	2	2		2	2	2	2	2	2	1	1	1	1	1	1	0	1	0	1	1	0	0	0	0	3	3	3	3	3	2	3	2	1	1	1	1	1	5	5	1	1	3
2021-08-10	40	2	1	11	5	infirmier	3	2	2	2	2	2	2	2	2	2	1	1	1	1	1	1	0	1	0	1	1	0	0	0	0	3	3	3	4	4	4	3	5	4	3	2	2	1	5	5	1	1	3
2021-08-10	31	2	1	11	5	infirmier	3	2	2	2	2	2	2	2	2	2	1	1	1	2	2	1	0	1	0	1	1	0	0	0	0	3	3	3	4	4	4	3	3	1	2	2	1	2	5	5	1	1	3
2021-08-11	33	2	3	11	5	stagiaire	9	3	2	2	2	2	2	2	2	2	1	1	2	2	2	1	0	1	0	1	1	0	0	0	0	3	3	4	3	2	2	2	2	1	2	2	2	2	4	3	1	2	1
2021-07-17	29	1	2	11	4	laborantin	12	7	2		2	2	2	2	2	2	1	1	1	1	2	1	0	0	1	1	1	0	0	0	0	4	3	3	3	3	4	4	3	2	4	2	2	2	4	4	4	5	2
2021-07-17	31	2	1	11	5	sage femme	5	4	2	2	2	2	2	2	2	1	1	2	2	2	2	1	0	0	0	0	1	1	0	0	0	2	2	4	5	3	2	5	4	4	4	4	3	3	5	4	2	2	3
2021-08-31	22	2	3	11	5	stagiaire	6	2	2	2	2	2	2	2	2	2	1	1	1	2	2	1	0	1	0	0	1	0	1	0	0	1	3	3	1	5	5	5	5	1	5	5	5	1	5	5	1	1	5
2021-07-05	27	2	1	12	5	infirmier	6	2	2	2	2	2	2	2	2	2	2	2	2	2	2	2	0	0	0	0	0	0	0	0	0	1	1	1	5	5	5	5	5	2	5	5	2	2	5	5	4	4	2
2021-07-14	28	2	1	11	5	infirmier	5	4	2	2	2	2	2	2	1	2	1	1	2	2	2	2	0	0	0	0	0	0	0	0	0	3	3	3	4	3	3	4	1	4	5	3	3	4	4	4	1	1	1
2021-08-10	33	2	3	11	5	infirmier	10	8	2	2	2	2	2	2	2	2	1	1	2	2	2	2	0	0	0	0	0	0	0	0	0	4	3	5	5	5	2	5	3	4	5	4	3	2	5	5	1	1	1
2021-08-10	36	2	1	11	5	infirmier	6	5	2	2	2	2	2	2	2	2	1	1	2	2	2	2	0	0	0	0	0	0	0	0	0	4	4	4	4	2	2	3	2	1	1	2	2	1	5	4	1	1	1
2021-08-10	25	2	3	11	5	sage femme	3	3	2	2	2	2	2	2	2	2	1	1	1	1	2	2	0	0	0	0	0	0	0	0	0	2	2	2	3	3	2	3	2	1	1	1	1	1	4	4	1	1	1
2021-08-10	28	1	2	11	5	laborantin	1	1	2		2	2	2	2	2	2	1	1	1	1	1	2	0	0	0	0	0	0	0	0	0	4	4	4	3	4	4	3	2	2	2	2	2	2	4	4	1	1	1
2021-08-10	28	2	1	11	5	laborantin	6	4	2	2	2	2	2	2	2	2	1	1	1	2	2	2	0	0	0	0	0	0	0	0	0	4	4	4	4	4	2	2	2	1	1	1	1	1	5	5	1	1	1
2021-08-11	25	2	2	11	5	infirmier	6	3	2	2	2	2	2	2	2	2	1	1	2	2	2	2	0	0	0	0	0	0	0	0	0	2	2	2	4	4	4	3	2	2	2	2	2	1	5	5	2	2	1
2021-08-11	25	1	2	11	5	infirmier	5	3	2		2	2	2	2	2	2	1	1	1	1	1	2	0	0	0	0	0	0	0	0	0	1	5	1	4	5	5	5	5	5	1	5	1	1	5	5	2	2	5
2021-08-10	26	2	1	11	5	sage femme	3	2	2	2	2	2	2	2	2	2	1	1	2	1	2	1	0	1	1	0	1	0	0	0	0	2	2	2	5	5	5	2	2	2	2	2	2	2	5	5	1	1	1
2021-07-17	34	2	1	11	5	laborantin	10	2	2	2	2	2	2	2	2	2	1	1	2	2	2	1	1	1	0	0	1	0	0	0	0	3	4	3	4	2	3	4	4	4	4	4	4	5	5	5	5	3	5
2021-08-11	28	2	1	11	5	infirmier	5	3	2	2	2	2	2	2	2	2	1	1	2	2	2	1	0	1	0	1	1	0	0	0	0	4	4	3	3	4	3	3	2	2	1	1	2	2	5	5	2	2	2
2021-07-12	31	1	1	11	5	infirmier	4	3	2		2	2	2	2	2	2	1	1	1	2	2	1	0	1	0	0	1	0	1	0	0	3	3	3	2	2	2	3	2	2	2	1	1	1	5	5	1	1	3
2021-08-10	39	2	1	11	5	infirmier	5	3	2	2	2	2	2	2	2	2	1	1	1	1	1	2	0	0	0	0	0	0	0	0	0	4	3	3	2	3	2	3	3	1	1	1	1	1	5	3	1	1	2
2021-08-10	26	2	1	11	5	sage femme	3	2	2	2	2	2	2	2	2	2	1	1	1	1	1	2	0	0	0	0	0	0	0	0	0	4	4	4	3	3	3	2	2	2	2	2	1	1	4	4	1	1	1
2021-08-11	26	2	1	11	5	infirmier	7	4	2	2	2	2	2	2	2	1	1	1	1	1	1	2	0	0	0	0	0	0	0	0	0	5	1	3	4	5	5	5	5	5	5	5	3	4	5	5	1	1	5
2021-07-15	39	2	1	11	5	infirmier	8	4	2	2	1	2	2	2	2	1	1	2	1	1	1	1	1	1	0	1	0	0	0	0	0	4	1	2	5	4	4	4	4	4	4	4	2	4	4	4	2	2	2
2021-07-12	35	2	1	11	5	infirmier	4	2	2	2	2	2	2	2	2	2	1	1	1	1	1	1	0	1	0	0	1	0	0	0	0	3	3	3	3	2	2	3	2	2	2	3	3	2	5	5	1	1	3
2021-08-10	50	2	1	11	5	infirmier	4	4	2	2	2	2	2	2	2	2	1	1	1	1	1	1	1	1	0	0	1	0	0	0	0	4	4	4	5	1	4	1	5	4	4	4	4	4	5	5	1	1	4
2021-08-26	33	2	1	11	5	infirmier	7	2	2	2	2	2	2	2	2	2	1	1	2	2	2	1	1	1	0	0	1	0	0	0	0	2	3	2	4	1	4	4	4	4	4	4	3	2	4	4	1	1	1
2021-07-14	27	2	1	11	5	sage femme	8	5	2	1	1	1	1	2	2	2	1	1	2	1	1	1	0	1	1	0	1	0	0	0	0	4	5	5	5	1	5	5	5	4	5	5	5	5	4	5	1	2	5
2021-08-10	34	2	1	11	4	laborantin	7	4	2	2	2	2	2	2	2	2	1	2	2	2	2	1	0	1	1	0	1	0	0	0	0	3	3	4	5	5	3	4	2	2	3	2	2	2	5	5	1	1	1
2021-08-23	28	2	1	11	5	sage femme	4	2	2	2	2	2	2	2	2	2	1	1	1	2	2	1	1	0	0	1	1	0	0	0	0	4	4	4	4	4	4	3	4	3	4	4	1	3	5	5	2	1	3
2021-07-14	28	2	3	11	5	sage femme	8	4	2	2	2	2	2	2	2	2	1	1	1	2	2	1	0	1	0	1	1	0	0	0	0	1	1	2	5	5	4	4	4	4	4	1	1	1	4	4	4	1	1
2021-08-23	36	2	1	11	5	sage femme	6	4	2	2	2	2	2	2	2	2	1	1	2	2	2	1	0	1	0	1	1	0	0	0	0	5	5	5	4	4	4	3	5	2	4	4	4	2	5	5	1	2	3
2021-08-31	32	1	2	11	4	medecin	3	2	1		2	2	2	2	1	2	1	1	1	1	1	1	0	1	0	1	1	0	0	0	0	4	4	4	3	4	5	4	4	3	4	3	1	3	5	5	2	2	4
2021-07-14	32	2	1	11	5	laborantin	3	2	2	2	2	2	2	2	2	2	1	1	2	2	1	1	0	0	0	0	1	1	0	0	0	2	2	5	5	3	2	5	4	4	4	4	4	4	5	5	4	3	3
2021-07-14	30	2	1	11	5	infirmier	6	2	2	2	2	2	2	2	2	2	1	1	1	1	1	1	0	0	1	0	0	0	1	0	0	5	1	1	5	3	5	5	3	5	5	5	3	5	5	5	1	1	1
2021-08-11	38	2	1	11	5	infirmier	10	6	2	2	2	2	2	2	2	2	1	1	1	1	2	1	0	1	0	0	1	0	1	0	0	3	3	3	4	2	2	5	4	4	4	4	3	3	4	4	2	2	2
2021-07-05	30	2	1	12	5	infirmier	6	3	2	2	2	2	2	2	1	2	2	2	2	2	2	1	1	1	1	1	1	0	1	0	0	4	4	4	4	2	4	5	3	3	5	5	5	5	4	4	2	2	4
2021-07-17	43	2	1	11	5	infirmier	7	3	2	2	2	1	2	2	2	2	1	1	1	1	1	1	0	1	1	0	0	0	0	1	0	4	4	2	4	4	4	4	4	4	4	4	4	4	4	4	4	2	4
2021-08-11	25	2	1	11	5	infirmier	12	8	2	2	2	2	2	2	2	2	1	1	2	2	2	1	0	0	0	1	1	0	0	1	0	3	4	2	4	4	4	4	4	4	4	4	1	4	4	4	1	1	4
2021-07-05	23	2	1	12	5	infirmier	5	3	2	2	2	2	1	2	1	2	1	2	2	2	2	1	1	1	0	1	1	0	1	1	0	4	5	4	5	4	4	5	4	2	5	5	2	3	5	5	1	1	3
2021-08-10	37	2	1	11	5	infirmier	7	2	2	2	2	2	2	2	2	2	1	1	1	1	2	1	1	1	1	0	0	0	0	0	1	5	4	2	5	5	5	5	5	2	5	3	3	3	5	3	1	1	3
2021-07-05	31	2	1	12	5	infirmier	10	6	2	2	2	2	2	2	1	2	1	2	2	2	2	2	0	0	0	0	0	0	0	0	0	4	4	4	5	4	4	5	5	4	5	5	5	5	5	5	1	2	2
2021-07-12	27	2	1	11	5	sage femme	6	2	2	2	2	2	2	2	2	2	2	2	2	2	2	2	0	0	0	0	0	0	0	0	0	4	4	4	4	3	2	2	2	1	1	1	1	1	3	3	1	1	1
2021-07-12	25	1	2	11	4	laborantin	8	4	1		2	2	2	2	2	1	1	1	1	2	2	2	0	0	0	0	0	0	0	0	0	3	3	3	4	5	5	5	5	5	3	5	4	4	5	5	3	2	3
2021-07-17	26	2	1	11	5	sage femme	3	2	2	2	2	2	2	2	2	2	1	1	1	1	2	2	0	0	0	0	0	0	0	0	0	4	4	4	4	2	1	4	2	4	2	2	2	2	5	5	3	2	2
2021-08-10	58	2	1	11	5	infirmier	2	2	2	2	2	2	1	2	2	2	1	1	2	2	2	2	0	0	0	0	0	0	0	0	0	4	4	3	4	1	1	5	4	3	4	4	2	3	4	4	3	4	3
2021-08-10	44	2	1	11	5	sage femme	6	3	2	2	1	1	1	2	2	2	1	1	2	2	2	2	0	0	0	0	0	0	0	0	0	3	3	3	4	4	4	3	2	4	3	3	3	3	5	5	1	1	1
2021-08-10	29	2	1	11	5	sage femme	8	6	2	2	2	2	2	2	2	2	1	1	2	2	2	2	0	0	0	0	0	0	0	0	0	2	2	2	5	3	3	5	5	5	5	1	1	5	5	5	1	1	1
2021-08-11	32	2	1	11	5	sage femme	3	2	2	2	2	2	2	2	2	2	1	1	1	1	1	2	0	0	0	0	0	0	0	0	0	5	5	4	4	4	4	2	2	2	2	2	2	2	5	5	2	2	3
2021-08-11	29	2	1	11	5	infirmier	6	4	2	2	2	2	2	2	2	2	1	1	2	2	2	2	0	0	0	0	0	0	0	0	0	3	3	4	4	4	4	2	3	2	2	2	1	1	5	5	1	1	1
2021-08-11	20	1	2	11	5	infirmier	7	7	1		2	2	2	2	1	2	1	1	2	2	2	2	0	0	0	0	0	0	0	0	0	3	4	4	5	1	5	5	5	3	5	3	4	2	4	4	2	3	3
2021-08-23	35	2	1	11	5	infirmier	3	2	2	2	2	2	2	2	2	2	1	1	1	2	2	2	0	0	0	0	0	0	0	0	0	5	5	4	4	4	4	2	3	2	5	4	2	1	4	5	1	1	2
2021-07-14	30	1	1	11	5	infirmier	7	3	2		2	2	2	2	2	2	1	1	1	1	2	1	0	1	0	0	1	0	0	0	0	5	4	2	5	2	5	4	2	2	2	2	2	4	5	4	2	2	2
2021-08-11	30	1	1	11	4	infirmier	5	4	2		1	1	2	2	2	2	1	1	1	1	2	1	1	1	0	0	0	1	0	0	0	5	4	4	5	1	5	5	5	3	5	5	2	5	5	5	5	1	2
2021-07-12	29	2	1	11	5	infirmier	4	2	2	2	2	2	2	2	2	2	1	1	1	2	2	1	0	0	0	0	1	0	1	1	0	1	5	1	5	5	5	5	5	5	5	5	5	5	5	5	1	1	1
2021-08-11	27	2	1	11	4	infirmier	4	2	2	2	2	2	2	2	2	2	1	1	2	2	2	1	1	1	1	0	0	0	0	0	0	4	4	4	4	5	5	5	5	5	4	3	1	1	4	5	3	1	5
2021-07-05	28	1	1	12	5	infirmier	6	2	1		2	2	2	2	2	2	2	2	1	1	1	1	1	1	1	1	1	0	1	1	0	1	1	1	5	5	5	5	1	5	5	5	5	5	5	5	2	4	1
2021-07-07	42	1	1	12	4	medecin	13	7	2		2	2	2	2	1	2	1	2	2	1	1	1	1	1	1	1	1	0	1	1	1	4	2	4	5	5	5	5	5	5	5	5	5	5	4	4	1	2	5
2021-07-05	23	2	2	12	5	infirmier	11	5	2	2	2	2	1	2	2	2	1	2	2	2	2	2	0	0	0	0	0	0	0	0	0	2	2	4	5	3	3	3	3	4	3	5	2	1	5	4	1	2	1
2021-07-07	18	1	2	12	4	infirmier	2	2	1		2	2	2	2	2	2	2	2	2	2	2	2	0	0	0	0	0	0	0	0	0	2	2	1	5	5	5	5	3	2	3	5	1	1	1	1	1	1	2
2021-07-14	32	2	3	11	5	sage femme	3	1	2	2	2	2	2	2	2	2	1	1	1	1	2	2	0	0	0	0	0	0	0	0	0	2	2	2	4	2	1	4	2	2	4	2	2	2	4	4	2	2	2
2021-08-31	29	2	2	11	4	medecin	4	3	1	2	2	2	2	2	1	1	1	1	1	1	1	1	0	1	0	1	1	0	0	0	0	5	5	5	5	5	2	5	5	3	5	3	2	3	5	5	1	1	1
2021-07-05	30	1	1	12	4	medecin	3	2	2		2	2	1	2	1	1	1	2	2	1	1	2	0	0	0	0	0	0	0	0	0	4	4	4	4	4	4	4	1	1	4	4	2	1	5	5	1	2	4
2021-07-17	24	2	3	11	5	sage femme	8	4	2	2	2	2	2	2	2	2	1	1	1	2	2	2	0	0	0	0	0	0	0	0	0	1	2	2	5	5	4	4	4	4	4	1	1	1	4	4	4	1	1
2021-08-11	32	2	1	11	5	sage femme	6	4	2	2	2	2	2	2	1	2	1	1	1	1	2	2	0	0	0	0	0	0	0	0	0	4	3	4	3	3	3	3	3	3	2	4	1	1	4	4	1	1	1
2021-08-11	30	2	1	11	5	sage femme	4	2	2	2	2	2	2	2	2	2	1	1	1	1	1	1	1	1	0	0	1	0	0	0	0	4	4	4	4	3	4	4	5	3	4	3	4	3	4	4	4	3	4
2021-08-27	35	2	1	11	5	stagiaire	7	4	1	2	2	2	2	2	2	2	1	1	1	1	2	1	1	0	0	1	1	0	0	0	0	4	2	2	2	4	5	2	4	5	4	1	4	4	4	4	1	1	1
2021-07-14	37	2	1	11	5	infirmier	2	1	2	2	1	2	2	2	2	2	1	1	1	2	2	1	0	1	0	1	1	0	0	0	0	3	3	3	5	1	5	5	5	5	5	3	3	5	5	5	1	1	1
2021-08-11	30	1	1	11	4	infirmier	3	2	2		2	2	2	2	2	2	1	1	1	1	1	1	1	1	0	0	0	1	0	0	0	5	5	5	5	5	5	5	5	5	5	5	3	5	5	5	5	2	3
2021-07-12	58	2	4	11	4	medecin	5	5	2	2	2	2	2	2	2	2	1	1	1	1	1	1	1	0	0	0	1	1	0	0	0	4	1	2	4	4	4	4	4	3	4	2	2	2	5	1	1	1	3
2021-07-17	35	2	1	11	4	laborantin	8	5	2	1	2	2	2	2	2	2	2	2	2	2	2	1	1	0	0	0	1	1	0	0	0	3	3	3	3	2	4	4	3	4	4	2	3	2	5	5	1	1	1
2021-07-05	36	1	2	12	4	laboratin	9	7	2		2	2	1	2	2	2	2	2	2	2	2	1	1	1	1	1	1	0	1	0	0	5	5	5	5	5	5	5	5	5	5	5	5	5	5	4	2	4	4
2021-07-07	31	2	3	12	5	laboratin	7	5	2	2	2	2	2	2	2	2	1	2	1	1	2	2	0	0	0	0	0	0	0	0	0	1	2	4	1	2	5	2	1	1	1	4	2	2	5	4	4	1	1
2021-07-17	54	1	1	11	4	laborantin	7	3	2		2	2	1	2	2	2	2	2	2	2	2	2	0	0	0	0	0	0	0	0	0	3	4	3	4	2	3	4	4	2	4	4	4	3	4	3	4	1	2
2021-08-10	50	1	1	11	4	laborantin	8	3	2		2	2	2	2	2	2	1	1	1	2	2	2	0	0	0	0	0	0	0	0	0	4	3	3	3	2	3	5	4	2	4	3	1	1	4	5	1	1	3
2021-08-11	33	2	1	11	4	infirmier	2	2	2	2	2	2	2	2	2	2	1	1	1	1	1	2	0	0	0	0	0	0	0	0	0	4	5	3	4	5	4	1	1	1	2	2	2	1	5	5	2	1	4
2021-07-14	40	2	1	11	5	infirmier	6	2	1	2	2	2	1	2	2	2	1	1	1	1	1	1	0	1	0	1	0	0	0	0	0	3	3	3	5	5	5	3	5	1	1	3	1	3	5	5	1	1	1
2021-08-31	30	1	1	11	4	medecin	5	3	1		2	2	1	2	2	2	1	1	1	1	1	1	0	1	0	1	1	0	0	0	0	4	4	4	4	3	3	3	3	1	5	2	1	1	4	4	4	2	3
2021-07-14	40	2	1	11	5	infirmier	6	2	2	2	2	2	2	2	1	2	1	1	1	1	2	2	0	0	0	0	0	0	0	0	0	4	3	1	5	3	3	3	3	1	1	1	1	1	4	4	1	1	1
2021-08-11	30	2	1	11	5	sage femme	12	8	2	2	2	2	2	2	1	2	1	1	2	2	2	1	0	1	1	0	1	0	0	0	0	3	4	3	4	4	3	3	3	3	3	5	1	1	4	5	1	1	1
2021-07-14	37	1	1	11	4	laborantin	15	9	2		1	2	1	2	2	2	1	1	1	1	2	1	0	1	0	0	1	0	0	1	0	4	4	4	4	4	4	4	4	3	4	4	3	3	5	5	1	1	1
2021-08-31	35	1	1	11	4	medecin	5	2	2		2	2	2	2	2	1	1	1	1	1	1	1	0	1	1	0	1	0	0	0	0	4	4	4	3	3	3	5	4	2	4	2	2	1	5	5	1	1	1
2021-08-31	40	2	1	11	5	infirmier	12	5	2	2	2	1	1	2	1	1	1	1	1	1	1	1	0	1	1	0	0	0	1	0	0	4	4	5	4	5	5	5	5	4	4	4	1	3	5	5	1	1	1
2021-07-14	28	2	1	11	4	laborantin	2	1	1	2	2	2	2	2	2	2	1	1	2	1	1	2	0	0	0	0	0	0	0	0	0	4	3	4	5	2	3	5	4	5	2	4	4	4	3	4	3	2	5
2021-08-26	45	1	1	11	5	infirmier	5	3	2		2	2	2	2	2	2	1	1	1	1	1	1	1	1	0	0	0	1	0	0	0	4	4	4	4	4	4	4	4	4	4	4	3	3	4	4	1	1	1
2021-08-31	38	1	1	11	4	medecin	7	4	2		2	2	1	2	2	1	1	1	1	1	1	1	0	1	0	0	1	1	0	0	0	3	3	3	4	4	4	3	3	3	4	3	5	3	4	4	5	1	1
2021-07-09	29	1	1	12	5	infirmier	4	2	2		2	2	2	2	2	2	2	2	2	1	2	2	0	0	0	0	0	0	0	0	0	1	1	1	5	5	5	5	5	5	5	5	4	2	5	5	4	2	3
2021-07-05	31	1	2	12	4	medecin	1	1	2		2	2	2	2	2	2	2	1	1	1	1	2	0	0	0	0	0	0	0	0	0	1	1	1	5	5	5	4	2	4	4	4	1	2	4	4	1	1	1
2021-07-07	26	1	2	12	4	laborantin	5	4	2		2	2	2	2	2	2	1	2	1	1	1	2	0	0	0	0	0	0	0	0	0	2	1	4	4	4	4	4	5	2	4	4	2	1	5	5	2	1	1
2021-07-05	40	1	1	12	4	medecin	8	4	2		2	2	1	2	1	2	1	1	2	1	1	1	1	1	1	1	1	1	0	0	1	5	5	4	4	2	1	5	5	2	5	5	4	4	5	5	1	1	1
2021-07-14	42	1	1	11	4	medecin	4	2	2		2	2	2	2	2	2	1	1	1	1	1	1	0	0	0	0	1	0	0	0	0	3	3	3	5	5	5	5	1	1	1	1	1	1	5	5	1	1	3
2021-07-14	33	2	1	11	5	sage femme	5	2	2	2	2	2	2	2	2	2	2	1	2	2	2	2	0	0	0	0	0	0	0	0	0	1	1	1	1	1	1	3	2	1	1	1	1	4	5	1	1	1	2
2021-08-23	29	2	1	11	5	sage femme	4	2	2	2	2	2	2	1	2	2	1	1	1	1	2	1	1	1	1	0	0	0	0	0	0	5	5	5	5	4	4	4	4	4	4	4	4	4	4	4	2	2	1
2021-08-26	47	2	1	11	5	infirmier	8	3	2	2	2	2	1	2	2	2	1	1	1	2	2	1	1	1	1	0	0	0	0	0	0	4	4	4	4	5	5	3	1	1	1	1	1	1	5	5	4	2	1
2021-08-26	38	2	1	11	5	infirmier	6	3	2	2	2	2	2	2	2	2	1	1	1	2	2	1	1	1	1	0	0	0	0	0	0	4	4	4	4	5	2	1	2	1	1	1	1	1	5	5	1	1	1
2021-08-26	48	2	1	11	5	infirmier	5	4	2	2	2	2	2	2	2	2	1	1	1	1	1	1	1	1	1	0	0	0	0	0	0	3	3	3	4	4	5	2	4	4	5	1	1	1	5	5	1	1	1
2021-08-26	34	2	1	11	5	infirmier	4	2	1	2	2	2	2	2	2	2	1	1	1	1	2	1	1	1	1	0	0	0	0	0	0	4	4	3	5	5	5	2	1	2	1	1	1	1	5	5	1	1	3
2021-08-26	52	2	1	11	5	infirmier	11	5	2	2	2	2	2	2	2	1	1	1	1	2	2	1	1	1	1	0	0	0	0	0	0	4	4	5	5	5	3	3	3	4	5	1	1	3	5	5	1	1	1
2021-08-26	37	2	1	11	5	stagiaire	8	5	2	2	2	2	2	2	2	2	1	1	2	2	2	1	0	1	1	1	0	0	0	0	0	5	5	5	5	5	5	3	4	3	4	3	1	1	5	5	2	1	2
2021-08-23	33	1	1	11	4	laborantin	6	4	1		2	2	2	2	2	2	1	1	1	1	1	1	1	1	0	0	1	0	0	0	0	2	2	2	4	4	4	4	5	5	4	2	5	5	4	4	4	5	4
2021-08-23	24	2	1	11	5	sage femme	4	4	2	2	2	2	2	2	2	2	2	2	2	2	2	1	1	1	0	0	1	0	0	0	0	4	4	4	4	4	4	4	4	4	4	4	4	4	5	5	4	2	4
2021-08-27	32	2	1	11	5	infirmier	5	3	2	2	2	2	2	2	2	2	1	1	1	2	2	1	1	1	0	0	1	0	0	0	0	3	3	3	5	5	5	3	2	3	4	4	1	1	5	5	1	1	1
2021-08-23	42	1	1	11	5	infirmier	5	3	2		2	2	2	2	2	2	1	1	1	1	1	1	1	0	1	0	1	0	0	0	0	3	3	3	4	4	4	4	4	4	4	4	3	3	5	4	1	1	1
2021-08-28	28	2	1	11	5	infirmier	3	2	2	2	2	2	2	2	2	1	1	1	1	2	1	1	1	0	1	0	1	0	0	0	0	1	1	2	4	4	4	4	4	4	4	4	1	3	4	4	2	1	4
2021-08-28	32	2	1	11	5	infirmier	6	3	2	2	2	2	2	2	1	1	1	1	1	2	2	1	1	0	1	0	1	0	0	0	0	4	4	4	5	3	2	3	4	3	5	2	2	2	5	5	1	1	1
2021-08-23	44	2	1	11	5	infirmier	5	2	2	2	2	2	2	2	2	2	1	1	1	1	1	1	1	0	0	1	1	0	0	0	0	4	3	3	3	3	3	2	2	4	5	4	2	2	5	5	2	2	2
2021-08-23	36	2	1	11	1	infirmier	3	2	2	2	2	2	2	2	1	2	1	1	1	2	1	1	0	1	0	1	1	0	0	0	0	5	4	4	5	3	2	3	3	2	5	3	4	2	5	5	2	1	2
2021-08-26	33	2	1	11	5	stagiaire	5	4	2	2	2	2	2	2	2	2	1	1	2	2	2	1	0	1	0	1	1	0	0	0	0	5	4	3	3	3	3	4	4	2	1	1	1	1	4	5	1	1	1
2021-08-26	27	2	2	11	5	stagiaire	5	3	2	2	2	2	2	2	2	2	1	1	2	2	2	1	0	1	0	1	1	0	0	0	0	4	4	4	4	4	4	2	4	1	4	1	1	1	5	4	1	1	1
2021-08-26	36	2	1	11	5	infirmier	4	2	2	2	2	2	2	2	2	2	1	1	1	2	2	1	0	1	0	1	1	0	0	0	0	4	4	4	5	4	5	5	2	1	1	1	1	1	5	5	2	1	1
2021-08-27	28	2	1	11	5	infirmier	3	2	2	1	2	2	2	2	2	2	1	1	1	1	2	1	0	1	0	1	1	0	0	0	0	5	3	3	5	2	1	3	2	2	5	1	1	1	5	5	1	1	2
2021-08-27	23	2	3	11	4	sage femme	11	8	2	2	2	2	2	2	2	2	1	1	2	2	2	1	0	1	0	1	1	0	0	0	0	5	5	5	5	5	5	5	5	5	5	5	1	1	5	5	1	1	5
2021-08-28	30	2	1	11	5	infirmier	4	2	2	2	2	2	2	2	2	2	1	1	1	1	1	1	0	1	0	1	1	0	0	0	0	4	4	4	4	3	4	4	5	3	4	3	4	3	4	4	4	3	4
2021-08-31	24	2	2	11	5	stagiaire	19	5	2	2	2	2	2	2	2	2	1	1	1	2	2	1	0	1	0	1	1	0	0	0	0	2	2	1	4	4	4	5	3	3	5	5	3	5	4	3	1	1	1
2021-08-26	25	2	1	11	5	sage femme	6	3	1	2	2	2	2	2	2	2	1	1	1	1	2	1	1	1	0	0	0	1	0	0	0	4	4	4	4	1	4	4	4	4	4	4	4	4	4	5	1	1	1
2021-08-23	28	1	2	11	4	laborantin	5	2	2		2	2	1	2	2	2	1	1	1	1	2	1	1	0	1	0	0	1	0	0	0	4	1	4	4	4	5	4	4	4	4	4	4	5	5	4	1	1	1
2021-08-28	30	2	1	11	5	infirmier	9	4	2	2	2	2	1	1	1	1	1	1	2	2	2	1	1	0	1	0	0	1	0	0	0	5	3	4	5	1	5	5	3	3	5	5	2	5	5	5	1	1	3
2021-08-26	32	2	1	11	5	infirmier	5	3	2	2	2	2	2	2	2	2	1	1	1	2	2	1	0	1	0	1	0	1	0	0	0	4	4	4	3	4	4	3	5	1	1	1	1	1	5	4	1	1	1
2021-08-23	25	2	1	11	5	sage femme	5	5	2	2	2	2	2	2	2	2	1	1	1	2	2	1	0	1	0	0	1	1	0	0	0	4	4	4	4	4	4	5	4	3	5	5	4	4	5	5	2	1	2
2021-08-26	31	2	1	11	5	infirmier	4	2	2	2	2	2	1	2	2	2	1	1	1	2	2	1	0	1	0	0	1	1	0	0	0	4	4	4	5	5	5	5	2	3	4	3	1	1	5	5	1	1	1
2021-08-27	27	2	1	11	5	sage femme	6	3	2	2	2	2	2	2	2	2	1	1	1	2	2	1	0	1	0	0	1	1	0	0	0	4	3	3	4	4	4	4	4	3	3	3	1	3	4	4	4	1	1
2021-08-27	36	2	1	11	5	infirmier	3	3	2	2	2	2	2	2	1	2	1	1	1	2	2	1	0	1	0	0	1	1	0	0	0	4	4	4	4	4	2	3	2	2	4	2	1	1	5	5	1	1	1
2021-07-07	25	2	2	12	5	infirmier	4	3	2	2	2	2	2	2	1	2	1	1	2	1	1	1	0	0	1	0	1	1	0	0	0	4	2	2	5	5	5	5	4	2	5	4	4	2	5	5	2	4	4
2021-08-27	35	2	3	11	5	infirmier	5	2	2	2	2	2	1	2	1	2	1	1	1	2	2	1	0	0	0	1	1	1	0	0	0	4	3	4	4	2	4	4	4	2	2	2	4	2	4	2	1	2	1
2021-08-26	40	2	1	11	5	sage femme	11	5	2	2	2	1	2	2	2	2	1	1	2	2	2	1	1	1	0	0	0	0	1	0	0	3	3	4	4	4	4	3	4	2	1	1	1	1	5	4	1	1	1
2021-08-26	48	2	1	11	5	sage femme	2	2	2	2	2	2	1	2	2	2	1	1	1	2	2	1	1	0	0	0	1	0	1	0	0	3	3	3	4	4	4	1	1	1	1	1	1	1	5	5	1	1	1
2021-08-26	37	2	1	11	5	infirmier	7	2	2	2	2	2	2	2	2	2	1	1	1	1	2	1	0	1	0	0	1	0	1	0	0	4	4	5	5	5	2	1	3	1	4	1	3	3	5	5	1	1	1
2021-08-26	43	2	1	11	5	infirmier	8	4	2	2	2	2	2	2	2	2	1	1	1	2	2	1	0	1	0	0	1	0	1	0	0	5	5	5	4	4	4	4	3	4	2	1	1	1	5	5	1	1	1
2021-08-26	29	2	3	11	5	sage femme	10	4	2	2	2	2	2	2	2	2	1	1	1	2	2	1	0	1	0	0	1	0	1	0	0	4	3	3	4	3	4	2	4	2	1	1	1	1	4	4	1	1	1
2021-08-27	27	2	1	11	5	infirmier	5	3	2	2	2	2	2	2	1	2	1	1	1	2	2	1	0	1	0	0	1	0	1	0	0	4	3	3	4	4	4	3	3	3	3	1	1	1	5	5	2	1	1
2021-08-27	28	2	2	11	5	sage femme	10	7	2	2	2	2	2	2	1	2	1	1	2	2	2	1	0	1	0	0	1	0	1	0	0	3	3	4	3	3	3	4	5	3	5	4	2	3	5	5	1	1	1
2021-08-28	25	1	2	11	5	infirmier	5	3	2		2	2	2	2	2	2	1	1	1	2	1	1	0	1	0	0	1	0	1	0	0	2	3	1	4	5	3	4	5	2	1	5	1	1	5	5	1	1	5
2021-08-28	30	2	1	11	5	sage femme	12	8	2	2	2	2	2	2	2	2	1	1	2	2	2	1	0	0	1	0	1	0	1	0	0	3	4	3	4	4	3	3	3	2	3	5	1	1	4	5	1	1	1
2021-08-31	26	2	2	11	5	stagiaire	9	3	2	2	2	2	2	2	2	1	1	1	1	2	2	1	0	0	1	0	1	0	1	0	0	1	1	1	1	4	4	5	5	5	5	5	3	5	1	1	4	1	1
2021-08-23	38	1	1	11	5	infirmier	6	2	2		2	1	1	2	2	1	1	1	1	2	2	1	1	0	0	0	0	1	1	0	0	5	5	5	5	5	5	5	5	5	5	5	5	5	5	5	3	1	4
2021-08-31	30	1	1	11	4	medecin	13	5	1		2	2	1	1	1	2	1	1	1	1	1	1	0	1	0	0	0	1	1	0	0	3	3	3	4	4	4	3	1	1	2	1	1	4	4	1	1	1	1
2021-07-05	20	2	1	12	5	infirmier	12	4	1	1	2	2	2	2	2	2	1	1	2	2	2	2	0	0	0	0	0	0	0	0	0	2	2	1	4	4	5	5	2	2	5	2	2	2	5	4	4	2	2
2021-07-08	22	2	2	12	5	infirmier	9	6	2	2	2	2	1	2	2	1	1	1	1	1	1	2	0	0	0	0	0	0	0	0	0	1	1	1	5	5	5	1	1	1	4	3	2	1	5	5	5	2	2
2021-08-23	23	1	2	11	5	stagiaire	6	4	2		2	2	2	2	2	2	2	1	1	2	2	2	0	0	0	0	0	0	0	0	0	4	3	4	3	5	5	4	2	4	3	3	4	4	5	5	2	1	2
2021-08-23	25	2	2	11	5	infirmier	3	2	2	2	2	2	2	2	2	2	1	1	2	2	2	2	0	0	0	0	0	0	0	0	0	4	4	4	4	4	4	5	4	5	5	5	3	3	5	4	2	2	2
2021-08-23	27	2	2	11	5	infirmier	2	2	2	2	2	2	2	2	2	2	1	1	1	2	2	2	0	0	0	0	0	0	0	0	0	4	4	4	4	4	4	4	4	5	5	3	4	4	5	4	1	4	4
2021-08-23	31	2	1	11	5	sage femme	4	2	2	2	2	2	2	2	2	2	1	1	2	2	2	2	0	0	0	0	0	0	0	0	0	5	5	5	5	4	4	5	5	4	5	4	1	1	5	5	2	1	3
2021-08-23	25	2	1	11	5	sage femme	5	5	2	2	2	2	2	2	2	2	1	1	1	2	2	2	0	0	0	0	0	0	0	0	0	4	4	4	4	4	4	5	4	3	5	5	5	4	5	5	2	1	2
2021-08-23	26	2	2	11	5	stagiaire	3	3	2	2	2	2	2	2	2	2	1	1	2	2	2	2	0	0	0	0	0	0	0	0	0	4	3	4	5	5	5	2	4	2	5	3	2	3	5	5	2	1	4
2021-08-23	30	1	2	11	5	stagiaire	4	3	2		2	2	2	2	2	1	1	1	2	2	2	2	0	0	0	0	0	0	0	0	0	4	4	4	5	5	4	2	4	2	4	4	1	2	5	5	1	2	4
2021-08-26	40	2	1	11	5	sage femme	8	7	2	2	2	1	1	2	1	2	1	1	2	2	2	2	0	0	0	0	0	0	0	0	0	4	4	4	4	5	5	3	3	3	4	4	2	1	5	5	2	1	2
2021-08-26	45	2	1	11	5	sage femme	16	12	2	2	2	2	2	2	2	2	1	1	1	2	2	2	0	0	0	0	0	0	0	0	0	4	4	5	5	5	5	5	4	3	3	4	2	3	5	5	1	1	1
2021-08-26	51	2	1	11	5	sage femme	6	4	2	2	2	2	2	2	2	2	1	1	1	2	2	2	0	0	0	0	0	0	0	0	0	5	4	3	4	4	4	3	5	2	1	1	1	1	5	5	1	1	1
2021-08-26	31	2	1	11	5	sage femme	3	2	2	1	2	2	2	2	1	2	1	1	2	2	2	2	0	0	0	0	0	0	0	0	0	3	3	4	4	5	5	2	2	1	1	1	1	2	5	5	1	1	1
2021-08-26	38	2	1	11	5	sage femme	6	2	2	2	2	2	2	2	2	2	1	1	1	2	2	2	0	0	0	0	0	0	0	0	0	5	5	5	4	4	3	3	3	1	1	1	1	2	5	5	1	1	2
2021-08-26	33	2	1	11	5	infirmier	6	2	2	2	2	2	2	2	2	2	1	1	1	2	2	2	0	0	0	0	0	0	0	0	0	4	4	4	5	5	5	4	1	4	2	1	1	1	5	5	1	1	1
2021-08-26	38	2	1	11	5	infirmier	3	3	2	1	2	2	1	2	2	2	1	1	1	1	2	2	0	0	0	0	0	0	0	0	0	4	5	5	5	5	5	4	4	4	5	5	2	1	5	5	1	1	1
2021-08-26	29	2	1	11	5	infirmier	6	3	2	2	2	2	2	2	2	2	1	1	1	2	2	2	0	0	0	0	0	0	0	0	0	5	4	5	4	4	5	4	3	4	2	4	4	2	5	5	1	1	1
2021-08-26	30	2	1	11	5	infirmier	4	3	2	2	2	2	1	2	1	2	1	1	1	1	2	2	0	0	0	0	0	0	0	0	0	4	3	4	4	2	4	4	4	2	2	4	2	4	4	2	2	2	2
2021-08-26	34	2	1	11	5	stagiaire	7	3	2	2	2	2	2	2	2	2	1	1	2	2	2	2	0	0	0	0	0	0	0	0	0	4	4	3	3	3	3	3	3	2	2	1	1	1	5	5	1	1	2
2021-08-26	27	1	2	11	5	infirmier	7	4	2		2	2	2	2	2	2	1	1	1	1	2	2	0	0	0	0	0	0	0	0	0	4	4	5	5	5	5	2	3	1	1	1	1	1	5	5	1	2	4
2021-08-26	25	2	2	11	5	infirmier	5	4	2	2	2	2	2	2	2	2	1	1	1	2	2	2	0	0	0	0	0	0	0	0	0	5	5	5	5	5	4	2	1	1	1	1	1	1	4	5	1	1	1
2021-08-26	32	2	1	11	5	sage femme	10	5	2	2	2	2	2	2	2	2	1	1	1	2	2	2	0	0	0	0	0	0	0	0	0	3	3	3	4	4	4	1	4	3	1	1	1	3	5	5	1	1	1
2021-08-26	26	2	2	11	5	stagiaire	3	2	2	2	2	2	2	2	2	2	1	1	1	2	2	2	0	0	0	0	0	0	0	0	0	4	4	4	1	1	1	2	1	1	1	2	1	1	5	5	1	1	1
2021-08-26	34	2	1	11	5	stagiaire	8	4	2	2	2	2	2	2	2	2	1	1	1	1	2	2	0	0	0	0	0	0	0	0	0	4	4	4	2	4	3	4	2	3	1	1	1	3	5	5	1	1	1
2021-08-26	33	2	3	11	5	infirmier	9	5	2	2	2	2	1	2	2	1	2	1	1	1	2	2	0	0	0	0	0	0	0	0	0	5	5	3	4	4	4	3	3	3	1	1	1	1	5	5	1	1	1
2021-08-27	34	2	1	11	5	stagiaire	4	3	2	2	2	2	2	2	2	2	1	1	1	1	2	2	0	0	0	0	0	0	0	0	0	3	3	1	5	5	1	5	5	3	1	1	2	3	5	5	1	1	1
2021-08-27	29	2	1	11	5	infirmier	4	3	2	2	2	2	2	2	2	2	1	1	1	2	2	2	0	0	0	0	0	0	0	0	0	3	3	3	5	5	5	5	5	5	5	5	3	3	5	5	5	1	1
2021-08-27	33	2	1	11	5	sage femme	7	3	2	2	2	2	2	2	2	2	1	1	1	2	2	2	0	0	0	0	0	0	0	0	0	3	3	5	5	5	5	3	5	3	5	3	2	3	5	5	1	1	1
2021-08-27	20	2	1	11	5	sage femme	8	6	2	2	2	2	2	2	2	2	1	1	1	2	2	2	0	0	0	0	0	0	0	0	0	3	3	3	3	4	4	2	2	4	2	2	1	1	5	3	1	1	1
2021-08-27	30	2	2	11	5	infirmier	4	3	2	2	2	2	2	2	2	2	1	1	1	2	2	2	0	0	0	0	0	0	0	0	0	2	2	2	3	3	3	2	4	4	2	1	1	2	5	5	1	1	3
2021-08-27	31	2	1	11	5	infirmier	4	3	2	2	2	2	1	1	1	2	1	1	1	2	2	2	0	0	0	0	0	0	0	0	0	4	4	5	3	3	3	5	4	4	2	1	1	4	5	5	2	1	1
2021-08-28	44	2	1	11	5	infirmier	5	2	2	2	2	2	2	2	2	2	1	1	1	1	2	2	0	0	0	0	0	0	0	0	0	4	3	4	3	2	2	4	4	3	3	3	1	1	5	5	1	1	5
2021-08-28	26	2	2	11	5	infirmier	7	4	2	2	2	2	2	2	2	1	1	1	1	1	1	2	0	0	0	0	0	0	0	0	0	5	3	3	5	5	1	1	5	1	5	5	2	4	5	5	3	2	5
2021-08-28	25	2	1	11	5	sage femme	5	4	2	2	2	2	2	2	2	2	1	1	1	2	2	2	0	0	0	0	0	0	0	0	0	4	4	4	4	4	4	4	4	3	3	5	2	3	5	5	2	2	3
2021-08-28	23	2	2	11	5	sage femme	9	5	2	2	2	2	2	2	2	2	1	1	2	2	2	2	0	0	0	0	0	0	0	0	0	1	1	1	4	4	4	4	4	1	4	1	3	1	5	4	1	1	3
2021-08-31	28	2	1	11	5	stagiaire	8	4	2	2	2	2	2	2	2	2	1	1	1	1	2	2	0	0	0	0	0	0	0	0	0	5	5	5	5	5	5	5	5	5	5	5	5	5	5	5	1	1	1
2021-08-31	40	2	1	11	5	infirmier	15	4	2	2	2	2	2	2	2	2	1	1	2	2	2	2	0	0	0	0	0	0	0	0	0	3	5	3	5	2	5	5	5	5	5	5	5	1	5	5	1	1	1
2021-08-31	26	1	2	11	5	stagiaire	8	4	2		2	2	2	2	2	2	1	1	1	1	1	2	0	0	0	0	0	0	0	0	0	4	3	4	3	3	3	5	4	2	5	2	2	1	5	5	1	1	3
2021-08-31	27	1	2	11	5	stagiaire	11	6	2		2	2	1	2	2	1	1	1	1	2	2	2	0	0	0	0	0	0	0	0	0	4	4	4	5	5	5	4	2	2	4	2	2	2	5	5	1	1	4
[truncated: 20 more columns]
