# Supplementary material for: Facilitators and barriers to COVID-19 vaccination among healthcare workers and the general population in Guinea
Source: Research Square preprint supplement (doi:10.21203/rs.3.rs-1659297/v1), 2022-05-27
Supplement: Supplementary file 2 [file 5fbfefe1e10d2816e17a7cc9.xlsx]

## Sheet: cvhcw11
						Facilitators and barriers to COVID-19 vaccination among healthcare workers and the general population in Guinea.
						Almamy Amara TOURE[1],2, Fodé Amara TRAORE3,4, Gnoume CAMARA3, Aboubacar Sidiki MAGASSOUBA5,Ibrahima BARRY1, Mohamed Lamine KOUROUMA4,Younoussa SYLLA1, Naby Yaya CONTE1,5, Diao CISSE5, Nafissatou DIOUBATÉ1, Sidikiba SIDIBE6,7, Abdoul Habib BEAVOGUI1, Alexandre DELAMOU5,6.
						Authors' affiliations 1 Maferinyah National Centre for Training and Research in Rural Health (CNFRSR), Forécariah, Guinea. 2 Kofi Annan University of Guinea.Conakry,Guinea. 3 Centre Hospitalo-Universitaire de Conakry,Service de maladies infectieuses. 4 Agence Nationale de Sécurité Sanitaire,Conakry,Guinée. 5 Centre MURAZ, Burkina Faso.6 Department of Public Health, Faculty of Sciences and Health …
today	patient_informations/age	patient_informations/sexe	patient_informations/statut_matrimonial	patient_informations/commune	patient_informations/niveau_education		patient_informations/Nbp_menage	patient_informations/Nbre_pers_plusde18ans	patient_informations/duree_sejour	patient_informations/grossesse	Antecedents/diabete	Antecedents/hta	Antecedents/surpoids	Antecedents/asthme	Antecedents/autreallergie	Antecedents/autremalchr	Information_vaccination/con_vaccin	Information_vaccination/types_vaccin	Information_vaccination/mapi	Information_vaccination/immun_individ	Information_vaccination/immun_collect	source_infos_COVID-19/cherch_info_COVID-19	source_infos_COVID-19/source_infos/1	source_infos_COVID-19/source_infos/2	source_infos_COVID-19/source_infos/3	source_infos_COVID-19/source_infos/4	source_infos_COVID-19/source_infos/5	source_infos_COVID-19/source_infos/6	source_infos_COVID-19/source_infos/7	source_infos_COVID-19/source_infos/8	source_infos_COVID-19/source_infos/9	perception_peur_COVID-19/probable_attrap_COVID-19	perception_peur_COVID-19/arisque_COVID-19	perception_peur_COVID-19/possible_attrap_COVID-19	perception_peur_COVID-19/pense_COVID-19_grav	perception_peur_COVID-19/pense_COVID_19_cons_neg	perception_peur_COVID-19/pense_COVID-19_nuisibl	perception_peur_COVID-19/trepeur_COVID_19	perception_peur_COVID-19/penser_COVID_19_malaise	perception_peur_COVID-19/mains_moites_pense_COVID_19	perception_peur_COVID-19/peur_mourir_COVID-19	perception_peur_COVID-19/regarde_nouvel_COVID-19_rend_nerveu	perception_peur_COVID-19/nepeut_dormir_COVID-19	perception_peur_COVID-19/acc_rythmecard_palpitation_COVID-19	attitudes_croyance/prendr_vaccin_COVID-19_benefic	attitudes_croyance/prendr_vaccin_COVID-19_renf_immun	attitudes_croyance/vaccins_reserv_grpes_pers	attitudes_croyance/vaccins_tropcher	attitudes_croyance/procedur_avoirvacc_laborieu
2021-04-17	32	1	1	1	4	ats	3	2	2		2	2	2	2	2	2	2	2	2	2	2	2	0	0	0	0	0	0	0	0	0	2	2	2	4	4	4	2	2	2	2	2	2	2	4	4	4	2	2
2021-06-01	36	1	1	1	4	infirmiere	11	6	2		2	2	2	2	1	2	1	1	1	1	2	1	1	1	0	1	0	0	0	0	0	4	4	4	5	5	5	3	5	3	2	2	2	2	4	4	4	2	2
2021-04-07	23	2	2	1	5	medecin	4	3	2	2	2	2	2	2	2	2	2	2	2	2	1	1	1	1	1	0	0	0	0	0	0	2	2	2	4	4	2	4	4	4	4	4	4	4	4	4	4	4	4
2021-04-07	24	2	1	1	5	medecin	5	2	2	2	2	2	2	2	2	2	1	2	2	2	2	1	0	1	1	1	0	0	0	0	0	2	2	2	4	4	1	4	4	4	4	3	1	2	4	4	4	4	4
2021-04-29	25	2	2	1	5	infirmiere	10	4	2	2	2	1	1	2	1	2	1	1	1	1	1	1	0	0	1	0	1	0	0	0	0	4	4	2	4	2	2	4	4	4	4	4	4	2	4	4	4	2	2
2021-05-31	30	1	2	1	4	medecin	16	8	2		2	2	1	1	1	2	1	1	1	1	1	1	0	0	1	0	1	0	0	0	0	4	4	4	4	4	4	4	4	4	4	4	4	4	4	4	4	2	2
2021-05-28	28	1	2	1	4	medecin	1	1	2		2	2	2	2	2	2	1	2	1	2	2	1	0	0	1	1	1	0	0	0	0	4	2	2	4	4	2	2	1	1	2	1	2	2	4	4	2	2	2
2021-05-19	31	2	1	1	5	infirmiere	5	2	2	2	2	2	1	2	2	2	1	1	1	2	2	1	0	0	1	1	1	0	0	0	0	4	4	4	4	4	5	4	4	4	4	4	2	2	4	4	4	2	2
2021-03-26	28	1	2	1	4	infirmiere	1	1	2		2	2	1	2	2	2	1	2	1	2	1	1	1	1	0	0	0	1	0	0	0	5	5	5	5	5	4	4	1	3	5	5	1	1	5	5	1	1	5
2021-04-08	25	2	2	1	4	sagef	10	7	2	2	2	2	2	2	1	2	1	2	1	1	1	1	0	0	0	1	1	1	0	0	0	4	2	4	4	4	3	2	2	2	1	2	1	1	4	4	3	1	3
2021-04-07	23	2	2	1	5	infirmiere	7	2	2	2	2	2	2	2	2	2	1	1	2	2	2	1	1	0	0	1	0	0	1	0	0	4	4	4	4	4	4	4	4	1	4	4	4	1	4	4	4	1	1
2021-04-08	27	1	2	1	4	infirmiere	2	2	2		2	2	2	2	2	2	1	1	1	1	1	1	0	0	0	0	1	0	1	0	0	2	4	4	4	4	4	4	5	4	4	4	4	2	4	4	4	2	2
2021-06-08	38	2	1	1	5	biologiste	12	5	2	2	2	2	2	2	2	1	1	1	1	2	2	1	0	1	0	0	1	0	1	0	0	2	4	2	4	2	4	4	4	4	4	4	4	2	4	4	2	2	2
2021-04-26	28	1	2	1	5	infirmiere	3	3	2		2	2	2	2	2	2	1	2	1	2	2	1	0	0	0	0	1	1	1	0	0	2	4	4	4	4	4	4	2	2	2	4	2	4	5	5	2	2	3
2021-04-26	27	1	2	1	5	ats	5	5	2		2	2	2	2	2	2	1	2	1	2	1	1	0	0	0	0	1	1	1	0	0	2	4	4	4	4	4	4	4	3	3	3	2	4	4	4	4	2	4
2021-05-05	28	1	2	1	4	medecin	11	8	2		2	2	2	2	2	2	1	1	1	1	1	1	0	0	0	0	1	1	1	0	0	4	4	4	5	4	4	4	4	4	4	4	3	4	5	5	2	2	5
2021-04-07	30	2	2	1	5	medecin	3	3	2	2	2	2	2	2	2	2	1	1	2	2	2	1	1	0	0	1	0	0	1	1	0	4	4	5	5	5	4	4	5	5	4	3	4	4	4	5	1	1	1
2021-04-07	27	2	2	1	5	sagef	13	6	2	2	2	2	1	2	2	2	2	1	1	2	2	1	1	1	1	0	0	0	0	0	1	2	2	2	2	3	4	2	4	2	2	2	2	4	2	2	2	2	4
2021-04-14	28	1	2	1	4	ats	11	10	2		2	2	1	2	1	2	1	1	1	1	1	1	0	0	1	0	1	0	0	0	1	4	2	4	4	5	4	2	2	2	2	2	2	2	4	4	4	2	4
2021-04-17	33	2	2	1	4	ats	1	1	2	2	2	2	2	2	2	2	2	2	2	2	2	2	0	0	0	0	0	0	0	0	0	2	2	2	4	3	2	4	4	4	4	4	4	2	4	4	2	2	2
2021-06-08	36	2	1	1	5	sagef	1	1	2	1	2	2	2	2	2	2	2	2	2	2	2	2	0	0	0	0	0	0	0	0	0	2	4	4	4	4	4	4	4	4	4	4	4	2	4	4	2	2	2
2021-04-07	46	2	4	1	5	infirmiere	7	2	2	2	2	1	2	2	2	2	1	2	2	2	2	2	0	0	0	0	0	0	0	0	0	2	4	3	4	4	4	4	3	2	4	4	2	4	4	4	1	1	4
2021-04-07	29	2	1	1	5	infirmiere	5	2	2	2	2	2	2	2	2	2	1	1	1	2	2	2	0	0	0	0	0	0	0	0	0	2	4	4	4	4	4	4	4	4	4	4	4	4	4	4	4	4	4
2021-06-08	28	2	1	1	5	medecin	2	2	2	2	2	2	2	2	2	2	1	2	1	2	1	2	0	0	0	0	0	0	0	0	0	2	2	4	4	4	4	4	4	4	4	4	4	4	4	4	2	2	2
2021-05-19	31	2	1	1	5	biologiste	8	3	2	2	2	2	2	2	2	2	2	1	1	2	2	2	0	0	0	0	0	0	0	0	0	2	2	2	4	4	4	4	2	2	4	4	4	2	4	4	2	2	2
2021-08-18	24	2	2	1	4	infirmiere	5	3	2	2	2	2	1	2	2	2	2	1	2	2	2	2	0	0	0	0	0	0	0	0	0	4	4	4	4	4	4	4	4	2	4	4	2	4	4	4	2	4	2
2021-05-28	26	1	2	1	4	infirmiere	3	3	2		2	2	2	2	2	2	1	1	1	1	1	2	0	0	0	0	0	0	0	0	0	4	2	3	4	4	4	3	2	2	4	2	2	2	4	4	2	2	2
2021-03-29	25	1	2	1	4	medecin	10	4	2		2	2	2	2	2	1	2	2	2	2	2	2	0	0	0	0	0	0	0	0	0	4	4	4	4	4	4	4	2	2	2	2	2	2	4	4	2	2	2
2021-04-07	25	2	1	1	5	sagef	7	4	2	2	2	2	2	2	2	2	2	2	2	2	2	2	0	0	0	0	0	0	0	0	0	2	4	4	4	4	4	4	4	4	4	4	4	4	4	4	2	1	4
2021-08-18	28	1	2	1	5	infirmiere	8	5	2		2	2	2	2	2	2	2	2	2	2	2	2	0	0	0	0	0	0	0	0	0	4	4	4	4	4	4	4	4	3	4	4	4	2	4	4	4	2	2
2021-04-19	34	2	1	1	4	infirmiere	10	5	2	2	2	2	1	2	2	2	1	1	2	2	1	2	0	0	0	0	0	0	0	0	0	3	4	2	4	2	4	3	4	2	4	4	2	2	4	4	4	2	2
2021-05-31	21	2	2	1	5	infirmiere	10	5	2	2	2	2	2	2	2	2	2	2	2	2	2	2	0	0	0	0	0	0	0	0	0	2	2	2	4	2	4	4	4	4	4	4	4	4	4	4	2	2	3
2021-04-21	28	1	2	1	5	infirmiere	6	6	2		2	2	2	2	2	2	1	2	1	2	1	2	0	0	0	0	0	0	0	0	0	2	3	3	4	4	4	4	3	2	2	2	2	2	4	4	4	2	4
2021-05-05	25	2	2	1	5	infirmiere	10	6	2	2	2	2	2	2	2	2	2	2	2	2	2	2	0	0	0	0	0	0	0	0	0	2	2	4	4	4	3	2	2	2	2	2	2	2	4	4	2	2	4
2021-04-07	25	1	2	1	5	infirmiere	7	7	2		2	2	2	2	2	2	2	2	2	2	2	2	0	0	0	0	0	0	0	0	0	2	2	4	4	5	5	5	1	2	5	5	5	2	5	5	2	2	2
2021-04-07	21	2	2	1	5	infirmiere	10	7	2	2	2	2	2	2	2	2	2	2	2	2	2	2	0	0	0	0	0	0	0	0	0	3	4	2	4	4	4	4	4	4	4	4	4	4	4	4	4	4	4
2021-04-21	23	1	2	1	5	infirmiere	9	8	2		2	2	2	2	1	2	1	2	1	2	2	2	0	0	0	0	0	0	0	0	0	4	4	4	4	4	4	3	2	2	2	2	2	2	4	4	4	4	4
2021-08-18	24	1	2	1	5	infirmiere	10	8	2		2	2	2	2	2	2	2	2	1	2	2	2	0	0	0	0	0	0	0	0	0	3	5	4	4	4	4	4	4	2	4	4	2	4	4	4	4	2	2
2021-08-18	23	2	2	1	5	infirmiere	10	8	2	2	2	2	2	2	1	2	1	1	2	2	2	2	0	0	0	0	0	0	0	0	0	2	2	2	1	1	2	1	2	2	2	2	4	2	4	4	2	2	4
2021-05-05	27	2	1	1	5	infirmiere	9	9	2	2	2	2	2	2	2	2	2	2	2	2	2	2	0	0	0	0	0	0	0	0	0	1	4	4	5	4	4	4	4	4	2	4	2	4	4	4	2	2	5
2021-04-21	25	2	2	1	5	ats	15	9	2	2	2	2	2	2	2	2	2	2	2	2	2	2	0	0	0	0	0	0	0	0	0	2	3	3	4	4	4	3	3	2	2	2	2	2	4	4	4	2	4
2021-05-03	27	2	1	1	4	sagef	4	2	2	2	2	2	2	2	1	2	1	1	1	1	2	1	0	0	1	0	0	0	0	0	0	1	4	1	4	4	4	4	5	4	4	4	1	1	4	4	2	1	1
2021-04-07	23	2	2	1	5	infirmiere	4	3	2	2	2	2	2	2	2	2	2	2	2	2	2	1	1	1	1	0	0	0	0	0	0	2	2	4	4	4	4	4	4	4	4	4	4	4	4	4	2	4	4
2021-04-07	20	2	2	1	5	infirmiere	7	4	1	2	2	2	2	2	2	2	1	2	2	2	2	1	0	1	1	1	0	0	0	0	0	4	4	4	4	4	4	4	4	1	4	4	4	4	4	4	4	4	4
2021-05-18	28	2	1	1	5	infirmiere	9	5	2	2	2	2	1	2	2	2	2	2	1	1	2	1	0	0	0	0	1	1	1	0	0	4	4	4	5	4	5	4	4	3	3	2	2	4	5	4	2	1	4
2021-04-07	38	2	1	1	5	infirmiere	9	4	2	2	2	2	2	2	2	2	1	2	2	2	2	1	1	1	0	0	0	0	0	1	0	4	4	4	4	5	5	5	5	5	5	3	4	4	4	4	2	4	4
2021-04-07	29	1	2	1	5	sagef	3	2	2		2	2	2	2	2	2	2	2	1	2	2	1	0	0	0	1	1	0	0	1	0	2	4	2	4	2	3	5	4	4	4	3	1	2	4	4	1	2	3
2021-04-07	25	2	1	1	5	medecin	3	2	2	1	2	2	2	2	2	2	2	2	2	2	2	2	0	0	0	0	0	0	0	0	0	2	4	1	4	1	4	4	2	2	4	2	2	2	4	4	2	4	4
2021-04-21	25	2	1	1	5	infirmiere	2	2	1	2	2	2	2	2	1	2	2	2	2	2	2	2	0	0	0	0	0	0	0	0	0	2	2	2	3	4	3	3	2	2	2	2	2	2	4	4	2	2	2
2021-04-07	25	2	1	1	5	infirmiere	4	2	2	2	2	2	2	2	2	2	2	1	2	2	2	2	0	0	0	0	0	0	0	0	0	4	4	1	5	5	5	4	5	5	3	3	3	2	5	5	4	4	3
2021-05-20	25	2	1	1	4	infirmiere	7	3	2	2	2	2	2	2	2	2	1	1	1	1	1	2	0	0	0	0	0	0	0	0	0	4	4	4	4	4	4	2	2	2	2	2	1	1	5	5	3	2	2
2021-04-07	25	2	2	1	5	biologiste	9	4	1	1	2	2	2	2	2	2	2	2	2	2	2	2	0	0	0	0	0	0	0	0	0	4	4	4	4	4	4	4	4	4	4	5	5	5	1	4	4	4	1
2021-08-18	29	2	1	1	5	infirmiere	5	5	2	2	2	2	2	2	2	2	2	2	1	2	2	2	0	0	0	0	0	0	0	0	0	4	4	4	4	4	4	4	4	3	4	4	3	4	4	4	4	2	2
2021-07-06	23	2	2	1	5	sagef	9	8	2	2	2	2	2	2	2	2	2	2	2	2	2	2	0	0	0	0	0	0	0	0	0	2	4	2	2	2	2	3	5	2	2	2	2	3	2	2	2	2	1
2021-06-22	40	1	1	1	4	sagef	2	2	2		2	2	2	2	2	2	1	1	1	1	2	1	0	0	1	0	1	1	0	0	0	2	2	2	4	4	4	4	4	3	2	4	2	3	4	4	2	2	2
2021-04-26	26	2	1	1	5	infirmiere	7	7	2	1	2	2	1	2	2	2	2	2	2	2	2	1	1	1	0	0	0	0	0	0	0	4	4	4	4	4	4	4	4	4	4	4	3	4	4	4	4	2	4
2021-05-05	30	2	2	1	5	infirmiere	25	20	2	2	2	2	2	2	2	2	1	1	1	1	2	1	1	1	1	0	0	0	0	0	0	4	4	4	4	4	4	4	4	4	4	4	4	4	4	4	2	2	4
2021-05-03	35	2	2	1	5	medecin	25	15	2	2	2	2	2	2	2	2	1	1	1	1	2	1	1	1	0	1	0	0	0	0	0	4	4	4	4	4	4	4	4	4	4	4	4	4	4	4	2	2	4
2021-04-07	42	2	1	1	5	sagef	14	12	2	2	2	2	2	2	2	2	1	2	1	2	2	1	0	1	1	1	0	0	0	0	0	2	2	2	4	4	4	4	4	4	4	4	4	4	4	4	4	2	2
2021-07-07	29	2	1	1	5	infirmiere	3	2	2	1	2	2	2	2	2	2	1	1	1	1	2	1	1	1	1	1	0	0	0	0	0	2	2	4	5	4	4	4	4	2	4	4	4	4	4	4	2	2	4
2021-07-08	26	1	2	1	4	sagef	6	6	2		2	2	2	2	2	2	1	1	1	2	1	1	1	1	1	1	0	0	0	0	0	2	4	4	4	4	4	4	4	3	5	5	4	4	4	4	2	2	2
2021-05-03	31	2	2	1	5	sagef	30	24	2	2	2	2	2	2	2	2	1	1	1	1	2	1	1	1	1	1	0	0	0	0	0	4	4	4	4	4	4	4	4	4	4	4	4	4	4	4	2	2	4
2021-04-07	28	2	2	1	5	infirmiere	5	3	2	2	2	2	2	2	1	2	2	2	2	1	2	1	1	1	0	0	1	0	0	0	0	3	4	4	5	5	5	4	5	5	5	5	4	5	5	5	1	1	3
2021-05-05	32	2	1	1	5	medecin	7	3	2	1	2	2	2	2	2	2	1	2	2	2	2	1	1	1	0	0	1	0	0	0	0	4	4	4	4	4	4	4	4	4	4	4	4	4	4	4	4	2	4
2021-05-03	27	2	1	1	5	medecin	4	4	2	1	2	2	2	2	2	2	1	2	2	2	2	1	1	1	0	0	1	0	0	0	0	4	4	4	4	4	4	4	4	4	4	4	4	4	4	4	4	4	4
2021-04-07	22	2	1	1	5	infirmiere	8	8	1	2	2	2	2	2	2	2	1	1	2	2	2	1	1	1	0	0	1	0	0	0	0	1	1	1	4	4	4	4	3	4	4	4	2	1	4	4	1	4	4
2021-05-03	30	1	2	1	4	sagef	3	3	2		2	2	2	2	2	2	1	1	1	1	1	1	1	0	1	0	1	0	0	0	0	4	4	4	4	4	4	4	2	2	2	2	2	2	4	4	2	2	4
2021-03-29	36	1	1	1	4	infirmiere	10	5	2		2	2	2	2	1	2	1	1	1	1	1	1	1	0	1	0	1	0	0	0	0	2	3	3	4	4	4	4	3	2	2	2	2	2	4	4	2	2	5
2021-04-19	21	1	2	1	5	infirmiere	21	3	2		2	2	2	2	2	2	1	1	1	2	2	1	1	0	0	1	1	0	0	0	0	2	4	4	4	4	4	4	2	4	4	4	4	4	2	4	2	2	2
2021-04-07	26	2	2	1	5	medecin	14	10	1	2	2	2	2	2	2	2	2	1	2	2	2	1	1	0	0	1	1	0	0	0	0	3	4	4	1	4	4	4	3	4	1	3	1	5	5	5	1	5	3
2021-06-02	23	2	1	1	5	sagef	4	1	2	2	2	2	1	2	2	2	1	1	1	1	1	1	0	1	0	1	1	0	0	0	0	4	4	4	4	4	4	4	2	2	2	2	4	2	4	4	4	2	4
2021-04-19	20	2	2	1	5	infirmiere	7	5	2	2	2	2	2	2	2	2	1	1	1	1	2	1	0	1	0	1	1	0	0	0	0	4	4	4	4	4	4	4	4	2	4	4	4	2	4	4	4	2	2
2021-04-17	40	1	1	1	4	sagef	5	2	2		2	2	2	2	2	2	2	2	2	2	2	1	0	0	1	1	1	0	0	0	0	4	4	4	3	4	4	2	2	2	4	4	2	2	4	2	2	2	2
2021-05-03	50	2	1	1	5	infirmiere	8	3	2	2	2	1	2	2	2	2	1	2	2	1	2	1	0	0	1	1	1	0	0	0	0	4	4	4	4	4	4	4	4	4	4	4	4	4	4	4	2	2	4
2021-06-01	20	2	1	1	5	infirmiere	11	4	2	2	2	2	2	2	2	2	1	1	1	1	1	1	0	0	1	1	1	0	0	0	0	4	4	4	4	4	2	4	4	2	4	4	4	2	4	4	2	2	2
2021-05-18	20	2	2	1	5	medecin	10	4	2	2	2	2	2	2	2	2	1	1	1	2	2	1	0	0	1	1	1	0	0	0	0	4	4	3	5	5	5	5	4	2	4	4	2	2	4	4	1	1	2
2021-08-18	26	2	2	1	4	medecin	10	7	2	2	2	2	2	2	2	2	2	2	1	2	2	1	1	1	1	1	1	0	0	0	0	2	2	4	4	4	4	2	2	2	2	4	2	2	4	4	2	2	2
2021-07-08	26	2	2	1	5	medecin	6	3	2	2	2	2	2	2	2	2	1	1	1	2	2	1	1	1	1	0	0	1	0	0	0	2	4	4	4	4	4	2	2	2	2	2	2	4	2	2	4	2	2
2021-05-26	28	2	1	1	5	sagef	5	2	2	2	2	2	1	2	1	1	1	1	1	2	2	1	0	0	1	1	0	1	0	0	0	4	4	4	4	4	4	4	4	2	2	4	4	2	4	4	4	4	2
2021-04-20	28	1	1	1	4	infirmiere	2	2	2		2	2	1	2	1	2	2	2	2	1	1	1	0	0	1	1	0	1	0	0	0	2	4	4	4	4	4	4	4	2	2	2	2	2	3	3	4	2	2
2021-03-29	30	1	2	1	4	infirmiere	5	3	2		2	2	2	2	1	2	1	1	1	1	1	1	1	0	0	0	1	1	0	0	0	2	4	4	4	4	4	5	4	4	2	2	2	2	4	4	2	2	4
2021-05-03	48	2	1	1	5	sagef	11	6	2	2	1	2	2	2	2	2	1	1	1	2	2	1	1	0	0	0	1	1	0	0	0	3	3	3	4	4	5	3	3	3	3	4	3	3	4	1	1	1	1
2021-07-06	27	1	2	1	5	infirmiere	19	8	2		2	2	2	2	2	2	1	2	2	2	2	1	1	0	0	0	1	1	0	0	0	4	4	4	4	4	4	4	3	2	2	2	2	2	4	4	2	2	2
2021-04-23	22	2	2	1	5	medecin	5	2	2	2	2	2	2	2	2	2	1	1	1	1	1	1	0	1	0	0	1	1	0	0	0	4	4	4	4	4	4	4	2	2	3	4	2	2	4	4	4	2	4
2021-05-03	49	2	1	1	5	biologiste	15	6	2	2	2	2	2	2	2	2	1	1	1	1	2	1	0	1	0	0	1	1	0	0	0	4	4	4	4	4	5	5	3	2	3	4	3	3	4	4	1	1	1
2021-07-08	30	1	1	1	5	infirmiere	4	2	2		2	2	2	2	2	2	1	2	1	2	2	1	0	0	1	0	1	1	0	0	0	2	4	4	4	4	4	3	4	2	2	2	2	4	3	3	4	2	2
2021-05-31	26	1	2	1	4	medecin	3	2	1		2	2	1	2	2	2	1	1	1	1	1	1	0	0	1	0	1	1	0	0	0	4	4	4	4	4	4	4	2	2	2	4	2	2	4	4	4	2	2
2021-05-05	40	1	1	1	4	sagef	8	5	2		2	2	2	2	2	2	1	1	1	1	1	1	0	1	1	0	1	1	0	0	0	3	4	4	5	4	4	4	4	4	2	4	2	4	4	4	2	2	5
2021-05-26	39	1	2	1	5	sagef	3	3	1		2	2	2	2	1	2	1	1	1	1	1	1	0	0	0	1	1	1	0	0	0	4	4	4	4	4	4	4	4	2	4	4	1	1	5	5	5	2	2
2021-07-08	30	1	1	1	4	infirmiere	14	9	2		2	2	1	2	2	2	1	1	1	1	1	1	0	0	1	1	1	1	0	0	0	4	5	4	4	4	4	2	4	2	2	2	2	2	4	4	2	2	2
2021-04-01	29	2	2	1	4	sagef	2	2	2	2	2	2	2	2	2	2	1	1	1	1	2	1	0	0	0	0	0	0	1	0	0	1	1	1	5	5	4	3	3	3	3	4	2	4	4	5	4	2	4
2021-04-29	20	2	2	1	5	sagef	10	4	2	2	2	2	2	2	2	2	1	1	1	1	1	1	1	0	0	0	1	0	1	0	0	4	4	3	5	5	5	4	2	4	4	2	4	4	4	4	1	2	2
2021-05-28	25	2	1	1	5	biologiste	5	4	2	2	2	2	1	2	2	2	1	1	1	1	1	1	0	1	0	0	1	0	1	0	0	4	4	4	4	2	4	4	4	2	4	4	4	2	4	4	2	2	2
2021-04-22	20	2	2	1	5	medecin	10	4	2	2	2	2	2	2	2	2	1	1	1	2	2	1	0	0	0	1	1	0	1	0	0	4	4	3	5	5	5	5	4	4	4	4	4	2	4	4	4	4	4
2021-04-24	20	2	2	1	5	infirmiere	10	4	2	2	2	2	2	2	2	2	1	1	1	2	1	1	0	0	0	1	1	0	1	0	0	4	4	3	5	5	5	4	4	2	4	4	2	2	4	4	1	1	1
2021-04-21	31	1	2	1	5	sagef	6	6	2		2	2	2	2	2	2	1	2	1	2	2	1	0	0	0	0	1	1	1	0	0	4	4	4	4	4	4	4	4	4	4	4	3	3	4	4	4	2	4
2021-07-08	28	1	2	1	4	sagef	8	6	2		2	2	2	2	2	2	1	1	1	1	2	1	0	0	0	0	1	1	1	0	0	2	5	4	4	4	4	4	4	4	4	4	4	4	4	4	2	2	2
2021-04-07	30	2	1	1	5	infirmiere	6	5	2	2	2	2	2	2	2	2	1	2	2	2	2	1	1	1	0	0	0	0	0	1	0	4	4	4	5	5	5	5	5	5	5	5	5	4	4	5	4	4	4
2021-05-03	38	2	1	1	5	sagef	8	3	2	2	2	2	2	2	2	2	1	2	1	1	2	1	0	1	0	0	1	0	0	1	0	2	1	1	4	4	4	4	4	4	4	4	4	4	4	4	4	4	4
2021-05-05	35	2	1	1	5	biolog	8	4	2	2	2	2	2	2	2	2	1	2	1	1	2	1	0	1	0	0	1	0	0	1	0	2	1	3	4	4	3	4	4	4	4	4	4	4	4	4	4	4	4
2021-07-15	29	2	2	1	5	biologiste	11	7	2	2	2	2	2	2	2	2	1	1	1	1	1	1	0	1	0	0	1	0	0	1	0	2	2	3	5	5	5	4	4	3	4	4	4	2	5	5	1	1	1
2021-07-15	35	2	1	1	5	infirmiere	12	8	2	2	2	2	2	2	1	2	1	1	1	1	1	1	0	0	0	1	1	0	0	1	0	3	4	3	4	4	4	4	3	3	5	3	3	3	5	5	1	2	1
2021-04-07	36	2	1	1	4	infirmiere	6	3	2	2	2	2	2	2	2	2	1	1	2	2	2	1	0	1	0	0	1	1	0	1	0	1	5	4	5	2	5	5	5	2	5	5	1	1	5	5	1	1	5
2021-05-03	42	1	1	1	4	ats	10	5	2		2	2	2	2	2	2	1	1	1	1	1	1	0	0	0	0	0	0	0	0	1	4	2	4	4	5	4	4	4	2	2	4	2	2	4	4	2	2	2
2021-07-08	27	2	2	1	5	infirmiere	7	4	2	2	2	2	2	2	2	2	1	2	2	2	2	1	1	0	0	0	1	0	0	0	1	2	2	2	3	3	2	2	2	2	2	2	2	2	4	4	4	2	3
2021-08-18	31	1	1	1	5	infirmiere	3	2	2		2	2	2	2	2	2	2	1	1	1	1	1	1	1	1	1	1	0	0	0	1	4	4	4	4	4	4	4	4	2	4	4	2	2	4	4	2	2	2
2021-06-05	36	2	1	1	5	infirmiere	7	2	2	2	2	2	2	2	2	2	2	2	1	2	2	2	0	0	0	0	0	0	0	0	0	2	2	2	4	4	4	4	4	2	4	4	2	2	4	4	2	2	2
2021-05-18	36	1	1	1	5	infirmiere	2	2	1		2	2	2	2	2	2	1	2	1	1	2	2	0	0	0	0	0	0	0	0	0	3	4	4	5	4	4	4	4	2	2	2	2	3	4	4	4	2	1
2021-04-21	30	2	1	1	5	infirmiere	3	2	2	1	2	2	2	2	2	2	1	2	1	2	2	2	0	0	0	0	0	0	0	0	0	2	3	3	4	3	4	2	2	2	2	2	2	2	4	4	4	2	2
2021-04-26	25	2	1	1	5	infirmiere	2	2	1	2	2	2	2	2	2	2	2	2	2	2	2	2	0	0	0	0	0	0	0	0	0	1	2	2	3	4	3	2	1	1	1	1	1	1	4	4	2	2	4
2021-05-24	32	2	1	1	5	infirmiere	6	2	2	1	2	2	2	2	2	1	1	2	2	2	2	2	0	0	0	0	0	0	0	0	0	4	4	2	4	2	4	4	4	2	4	2	2	2	4	4	2	2	2
2021-04-20	23	2	2	1	5	infirmiere	6	3	2	2	2	2	2	2	2	2	2	2	1	2	2	2	0	0	0	0	0	0	0	0	0	2	2	2	4	4	4	4	4	4	4	4	4	2	4	4	2	2	2
2021-04-07	35	1	2	1	5	infirmiere	5	3	2		2	2	2	2	2	2	2	2	2	1	2	2	0	0	0	0	0	0	0	0	0	4	4	4	5	4	5	4	5	5	4	3	2	2	4	4	4	4	4
2021-03-26	24	2	2	1	3	infirmiere	4	3	2	2	2	2	2	2	2	2	1	1	1	1	1	2	0	0	0	0	0	0	0	0	0	2	4	2	4	4	4	4	4	4	4	4	4	2	4	4	4	2	4
2021-05-28	63	2	4	1	5	infirmiere	6	3	2	2	1	2	2	2	2	1	2	2	2	2	2	2	0	0	0	0	0	0	0	0	0	2	4	2	4	4	4	4	4	2	4	2	2	2	4	4	4	2	2
2021-06-01	27	2	2	1	5	infirmiere	7	3	2	2	2	2	2	2	2	1	2	2	2	2	2	2	0	0	0	0	0	0	0	0	0	4	4	4	4	4	4	4	4	4	4	4	4	4	4	4	4	2	2
2021-06-28	25	1	2	1	5	infirmiere	8	4	2		2	2	2	2	1	2	2	2	2	2	2	2	0	0	0	0	0	0	0	0	0	2	4	2	4	4	4	4	2	2	2	2	2	2	4	4	4	2	2
2021-07-06	29	2	1	1	5	medecin	9	4	2	2	2	2	2	2	2	2	2	1	1	2	2	2	0	0	0	0	0	0	0	0	0	5	4	4	5	4	5	5	4	3	2	4	5	5	5	5	2	2	1
2021-07-06	26	2	1	1	5	infirmiere	4	4	2	2	2	2	2	2	2	2	2	2	2	2	2	2	0	0	0	0	0	0	0	0	0	4	4	4	5	5	5	4	2	2	2	2	2	2	4	4	2	2	1
2021-06-28	25	2	3	1	5	medecin	12	8	2	2	2	2	2	2	1	2	1	1	2	2	2	2	0	0	0	0	0	0	0	0	0	3	2	3	5	5	5	5	4	4	5	5	4	4	5	4	1	1	2
2021-04-17	25	2	2	1	3	medecin	9	9	2	2	2	2	2	2	2	2	1	2	1	2	2	2	0	0	0	0	0	0	0	0	0	2	2	2	4	4	4	5	4	2	4	4	2	2	4	4	4	2	2
2021-04-26	28	1	2	1	5	sagef	14	10	2		2	2	2	2	2	2	1	2	1	2	2	2	0	0	0	0	0	0	0	0	0	2	2	3	4	4	4	3	2	2	2	2	2	2	4	4	4	2	2
2021-07-08	29	1	2	1	4	ats	8	8	2		2	2	2	2	2	2	1	1	1	1	2	1	0	0	0	0	1	1	1	0	0	4	4	4	4	4	4	4	4	4	4	2	2	2	4	4	2	2	2
2021-03-25	26	1	2	1	4	infirmiere	13	6	2		2	2	2	2	2	1	1	1	1	1	1	2	0	0	0	0	0	0	0	0	0	4	3	4	3	4	4	3	2	2	3	3	2	1	4	4	3	4	3
2021-06-04	28	2	1	1	5	medecin	4	2	1	2	2	2	2	2	2	2	1	1	1	1	1	1	1	0	1	0	1	0	0	0	0	1	2	2	2	3	4	4	4	4	3	2	1	4	4	4	2	2	2
2021-06-04	26	2	2	1	5	infirmiere	13	10	2	2	2	2	2	2	2	2	2	2	1	2	2	1	1	1	1	0	1	0	0	0	0	5	5	4	5	1	4	5	5	5	4	4	2	4	4	4	2	2	1
2021-05-24	25	1	2	1	5	medecin	3	3	2		2	2	1	2	2	2	1	2	1	2	2	1	0	1	0	1	1	0	0	0	0	4	4	4	4	4	4	2	4	4	4	4	2	2	4	4	4	2	2
2021-04-14	32	1	1	1	4	biolog	9	4	2		2	2	1	2	1	2	1	2	1	1	2	1	0	1	0	1	1	0	0	0	0	4	4	4	4	4	4	2	2	2	2	2	2	2	4	4	4	2	2
2021-05-24	21	2	2	1	5	biolog	20	7	2	2	2	2	2	2	2	1	2	2	2	2	2	1	0	1	0	1	1	0	0	0	0	4	4	4	4	4	4	4	4	4	2	4	2	4	2	3	2	2	2
2021-04-20	30	2	1	1	4	sagef	5	2	2	2	2	2	1	2	1	2	1	2	1	1	1	1	0	0	1	1	1	0	0	0	0	2	4	4	4	4	4	4	4	2	4	4	2	2	4	4	4	2	2
2021-05-05	56	2	1	1	4	medecin	15	9	2	2	2	2	2	2	2	2	1	1	1	1	2	1	1	1	0	0	0	1	0	0	0	1	1	2	2	4	2	2	2	2	2	2	2	2	2	4	1	1	1
2021-06-04	38	1	1	1	4	biolog	5	2	2		2	2	2	2	2	2	1	2	1	2	2	1	1	0	1	0	0	1	0	0	0	1	4	2	2	4	4	3	2	2	2	2	2	2	4	4	4	2	2
2021-07-08	30	2	1	1	5	medecin	5	4	2	1	2	2	2	1	2	2	1	1	1	2	2	1	1	0	1	0	0	1	0	0	0	4	4	4	3	3	3	2	2	2	2	3	2	2	2	2	4	1	3
2021-04-14	28	1	2	1	4	medecin	9	6	2		2	2	2	2	2	2	1	1	2	1	1	1	1	0	0	1	0	1	0	0	0	4	5	5	5	5	5	5	5	3	5	5	3	3	5	5	5	1	1
2021-06-04	28	1	2	1	4	medecin	2	2	2		2	2	1	2	1	1	1	1	1	1	1	1	0	1	0	1	0	1	0	0	0	4	4	4	3	4	4	4	4	4	2	4	2	1	4	4	4	2	2
2021-07-08	28	1	2	1	4	medecin	4	4	2		2	2	2	2	1	2	1	1	1	1	1	1	1	0	0	0	1	1	0	0	0	4	4	4	4	4	4	4	4	2	2	4	2	2	4	4	2	2	2
2021-07-08	30	1	2	1	4	infirmiere	12	8	2		2	2	2	2	2	2	1	1	1	1	1	1	1	0	0	0	1	1	0	0	0	3	5	4	4	4	4	5	4	2	5	5	2	5	5	5	2	2	2
2021-04-21	33	1	1	1	4	infirmiere	6	6	2		2	2	2	2	2	2	1	1	1	1	1	1	0	0	1	0	1	1	0	0	0	4	5	4	4	4	4	4	4	3	2	2	2	4	4	4	2	2	4
2021-04-21	35	1	2	1	4	infirmiere	13	10	2		2	2	2	2	2	2	1	1	1	1	1	1	0	0	1	0	1	1	0	0	0	2	4	4	4	4	4	4	4	2	4	4	2	4	4	4	2	2	4
2021-06-05	30	1	2	1	5	infirmiere	1	1	1		2	2	2	2	1	2	1	1	1	1	1	1	0	0	0	0	1	1	1	0	0	4	2	4	4	4	4	2	2	2	4	4	2	2	4	5	2	2	2
2021-07-15	24	2	2	1	5	sagef	14	6	2	2	2	2	2	1	2	2	1	1	2	2	2	1	1	0	0	0	0	0	0	1	0	3	2	4	4	4	5	5	4	3	5	3	2	2	4	4	2	2	4
2021-06-05	25	2	2	1	5	sagef	4	1	2	2	2	2	1	2	1	2	1	1	1	2	1	2	0	0	0	0	0	0	0	0	0	2	2	2	3	4	2	2	2	2	2	3	2	2	4	4	4	2	2
2021-04-19	28	1	1	1	5	sagef	2	2	2		2	2	2	2	2	2	2	2	2	2	2	2	0	0	0	0	0	0	0	0	0	2	2	2	4	4	4	4	4	4	4	4	4	3	4	4	4	2	2
2021-07-14	26	2	1	1	5	sagef	5	2	2	2	2	2	2	1	1	2	2	2	2	2	2	2	0	0	0	0	0	0	0	0	0	2	4	4	4	3	4	2	2	2	2	2	2	2	3	3	2	2	2
2021-03-30	25	2	1	1	5	stagiaire	2	2	1	2	2	2	2	2	2	2	2	2	2	2	2	2	0	0	0	0	0	0	0	0	0	4	3	3	4	4	4	3	2	2	3	2	2	2	4	4	4	4	4
2021-06-29	30	2	1	1	5	biologiste	3	2	2	1	2	2	1	1	1	2	1	1	1	1	2	2	0	0	0	0	0	0	0	0	0	4	4	4	4	4	4	3	3	2	3	2	2	2	4	4	2	2	2
2021-07-08	28	2	1	1	5	infirmiere	2	2	2	2	2	2	2	2	2	2	2	2	2	2	2	2	0	0	0	0	0	0	0	0	0	3	4	5	4	4	4	3	5	2	4	2	2	1	2	2	4	1	3
2021-05-20	30	2	1	1	4	infirmiere	6	3	2	1	2	2	2	2	2	2	2	2	2	2	2	2	0	0	0	0	0	0	0	0	0	2	2	1	1	1	1	1	4	4	3	3	1	2	4	3	2	2	2
2021-06-04	28	1	2	1	4	infirmiere	5	4	2		2	2	1	2	2	2	1	1	1	1	2	2	0	0	0	0	0	0	0	0	0	1	5	5	5	5	5	1	2	2	4	2	2	2	4	5	2	2	1
2021-05-31	28	2	2	1	5	sagef	6	4	2	2	2	2	2	2	2	2	1	1	1	2	2	2	0	0	0	0	0	0	0	0	0	4	4	4	4	4	2	4	4	4	4	4	4	4	4	4	4	4	2
2021-07-06	25	2	2	1	5	infirmiere	7	4	2	2	2	2	2	2	2	2	2	2	2	2	2	2	0	0	0	0	0	0	0	0	0	4	5	4	4	5	2	3	3	2	2	2	2	2	4	4	4	2	4
2021-07-06	26	2	2	1	5	medecin	6	4	2	2	2	2	1	2	1	2	2	2	2	2	2	2	0	0	0	0	0	0	0	0	0	4	3	3	5	4	2	2	2	2	2	2	2	2	4	4	4	2	4
2021-06-05	50	2	4	1	5	infirmiere	6	4	2	2	1	2	1	2	1	2	1	1	1	1	1	2	0	0	0	0	0	0	0	0	0	4	4	4	4	4	4	4	4	2	4	4	4	2	4	4	2	2	2
2021-04-19	23	2	1	1	5	infirmiere	8	5	2	2	2	2	1	2	1	1	2	2	2	1	1	2	0	0	0	0	0	0	0	0	0	4	4	4	4	4	4	3	4	2	4	4	2	2	4	2	2	2	2
2021-04-14	28	1	1	1	4	medecin	5	5	2		2	2	2	2	2	2	1	1	1	1	1	2	0	0	0	0	0	0	0	0	0	3	4	3	4	4	3	3	3	2	2	3	2	2	3	3	4	1	1
2021-05-18	30	1	2	1	5	infirmiere	6	6	2		2	2	2	2	2	2	1	2	1	1	2	2	0	0	0	0	0	0	0	0	0	4	4	2	4	4	4	4	4	4	4	4	3	4	4	4	2	2	2
2021-07-15	26	2	2	1	5	infirmiere	6	6	2	2	2	2	2	2	2	2	2	2	2	2	2	2	0	0	0	0	0	0	0	0	0	2	5	4	4	4	4	4	4	2	2	2	2	2	5	5	4	2	4
2021-05-29	28	2	2	1	4	biolog	6	6	2	2	2	2	2	2	2	2	1	1	1	1	1	2	0	0	0	0	0	0	0	0	0	4	4	2	4	4	2	3	4	1	2	4	1	1	4	4	4	4	4
2021-05-28	30	2	2	1	5	infirmiere	10	8	2	2	2	2	1	2	2	2	1	2	2	2	2	2	0	0	0	0	0	0	0	0	0	2	2	2	4	4	3	2	4	2	2	4	2	2	4	4	4	2	2
2021-05-05	50	2	1	1	5	infirmiere	18	11	2	2	2	1	2	2	2	2	1	1	1	2	2	2	0	0	0	0	0	0	0	0	0	2	4	3	4	3	3	3	2	2	2	2	2	2	4	4	2	2	4
2021-06-04	34	1	2	1	4	sagef	1	1	2		2	2	2	2	2	2	1	2	1	2	2	1	1	0	0	0	1	1	0	0	0	3	4	1	4	4	4	4	4	1	4	4	1	3	4	4	2	4	1
2021-07-06	38	2	2	1	5	infirmiere	6	2	2	2	2	2	2	2	2	2	1	1	1	2	2	1	1	1	1	0	0	0	0	0	0	2	4	2	5	5	5	5	5	5	4	4	5	5	3	3	2	1	1
2021-07-06	32	2	1	1	5	sagef	4	2	2	2	2	2	2	2	2	2	2	1	2	2	2	1	0	1	1	0	1	0	0	1	0	4	2	2	4	4	4	4	2	2	2	2	2	3	4	2	2	2	4
2021-07-14	29	2	1	1	5	medecin	7	4	1	2	2	2	2	2	2	2	2	1	2	2	2	1	0	0	0	0	1	1	0	1	0	4	4	2	4	2	3	2	2	2	2	4	2	2	2	4	2	2	4
2021-06-28	24	2	1	1	5	sagef	17	8	2	1	2	2	2	2	2	2	2	1	2	1	1	1	0	0	0	0	1	1	0	1	0	4	2	5	4	4	2	2	4	2	1	1	1	4	1	1	2	1	1
2021-07-08	35	2	1	1	5	sagef	4	2	1	2	2	2	2	1	2	2	2	2	2	1	2	2	0	0	0	0	0	0	0	0	0	4	4	2	5	5	5	5	3	2	3	2	1	2	3	2	4	2	2
2021-04-01	38	2	1	1	4	infirmiere	3	3	1	2	2	2	2	2	2	2	1	1	1	1	2	2	0	0	0	0	0	0	0	0	0	1	1	3	4	4	4	3	2	2	3	4	4	2	2	4	2	2	2
2021-07-15	33	2	1	1	5	medecin	8	3	2	2	2	2	1	2	1	2	1	2	2	2	2	2	0	0	0	0	0	0	0	0	0	4	4	4	4	4	4	4	4	2	5	4	2	4	5	5	2	2	2
2021-06-29	29	2	1	1	5	sagef	8	6	1	1	2	2	1	2	2	2	2	2	2	2	2	2	0	0	0	0	0	0	0	0	0	2	4	3	4	4	3	5	4	2	3	2	4	2	4	4	2	2	4
2021-06-25	27	1	1	1	5	biolog	2	2	2		2	2	2	2	2	2	1	1	1	1	2	1	1	0	1	0	0	1	0	0	0	2	2	1	4	4	4	2	4	2	2	2	2	2	4	4	2	2	2
2021-08-18	50	1	1	1	4	sagef	17	8	2		2	2	1	2	2	1	2	1	2	1	1	1	1	0	0	0	0	0	0	0	0	4	4	4	4	4	4	4	4	2	4	4	2	4	4	4	2	2	2
2021-05-31	27	2	1	1	5	ats	5	3	2	2	2	2	2	2	1	2	1	1	1	1	2	1	0	0	1	0	0	0	0	0	0	2	4	2	4	4	4	4	4	4	4	4	2	2	4	4	2	2	2
2021-03-30	25	1	2	1	4	infirmiere	4	4	2		2	2	2	2	2	2	2	2	2	1	2	1	1	0	1	0	0	0	0	0	0	2	4	4	4	4	4	4	3	2	4	4	2	2	4	4	4	4	1
2021-03-24	23	2	1	1	5	sagef	4	2	2	1	2	2	1	2	2	2	1	1	1	2	2	1	0	0	0	1	0	0	0	0	0	1	2	2	4	4	4	4	2	2	2	2	2	2	4	4	4	4	4
2021-05-24	35	2	1	1	4	infirmiere	10	2	2	1	2	2	2	2	2	2	1	1	1	1	2	1	0	1	0	1	0	0	0	0	0	2	2	2	4	2	4	4	4	1	5	2	4	2	4	4	1	4	4
2021-03-30	23	2	2	1	5	medecin	6	5	1	2	2	2	2	2	2	2	1	2	1	1	2	1	0	1	0	1	0	0	0	0	0	2	2	2	4	4	4	4	4	4	4	4	4	2	4	4	2	4	4
2021-06-04	45	2	1	1	5	infirmiere	10	2	2	2	2	2	2	2	1	2	1	1	1	1	1	1	1	1	0	1	0	0	0	0	0	2	2	2	4	4	2	4	4	4	5	4	4	4	4	4	4	2	2
2021-04-07	25	2	1	1	5	sagef	7	6	2	1	2	2	2	2	2	2	1	1	2	2	2	1	0	0	1	1	0	0	0	0	0	2	2	2	4	4	4	4	2	2	4	4	4	4	4	4	2	2	4
2021-04-20	32	2	1	1	4	medecin	5	2	2	2	2	2	2	2	2	2	2	2	2	1	1	1	0	1	1	1	0	0	0	0	0	2	2	4	4	4	4	4	4	2	2	4	2	2	4	4	4	2	2
2021-04-07	20	2	2	1	5	medecin	6	4	1	2	2	2	2	2	2	2	1	2	2	2	2	1	0	1	1	1	0	0	0	0	0	3	4	4	5	4	4	4	4	5	4	4	4	4	4	4	4	4	4
2021-06-04	39	2	1	1	5	medecin	11	9	2	1	2	2	2	2	2	2	1	1	1	1	1	1	0	1	1	1	0	0	0	0	0	1	1	1	1	2	1	2	1	2	2	2	1	2	4	4	2	2	2
2021-05-05	36	2	1	1	4	medecin	6	3	2	1	2	2	2	2	2	2	1	1	1	1	1	1	1	1	1	1	0	0	0	0	0	4	5	4	4	4	4	4	4	4	4	4	4	4	5	5	2	2	5
2021-04-21	41	1	1	1	4	medecin	6	4	2		2	2	2	2	2	2	1	1	1	1	1	1	1	1	1	1	0	0	0	0	0	4	4	5	5	4	4	4	4	4	4	4	2	4	5	5	2	2	4
2021-04-21	35	1	1	1	4	infirmiere	9	5	2		2	2	2	2	2	2	1	1	1	1	1	1	1	1	1	1	0	0	0	0	0	2	5	4	4	4	4	3	3	3	2	2	2	2	4	4	4	2	4
2021-05-29	28	2	2	1	4	medecin	7	3	2	2	2	2	2	2	1	2	2	2	2	2	2	1	0	0	0	0	1	0	0	0	0	3	3	3	5	5	3	3	3	2	3	3	2	2	3	3	5	5	2
2021-03-24	35	1	2	1	4	medecin	15	11	2		2	2	1	2	2	2	1	1	1	1	2	1	0	0	0	0	1	0	0	0	0	2	1	2	4	4	4	4	4	4	4	4	1	2	4	4	4	4	1
2021-05-24	27	2	2	1	5	sagef	15	11	2	2	2	2	2	2	2	2	2	1	1	1	2	1	0	1	0	0	1	0	0	0	0	4	4	4	4	2	4	2	5	5	3	3	1	1	4	5	4	1	1
2021-04-19	45	1	1	1	4	infirmiere	5	2	2		2	2	2	2	2	2	1	1	1	1	1	1	1	1	0	0	1	0	0	0	0	4	5	4	5	4	5	3	3	3	2	2	2	3	4	4	2	2	5
2021-03-23	36	1	1	1	4	infirmiere	5	3	2		1	1	1	2	2	2	1	1	1	1	1	1	1	1	0	0	1	0	0	0	0	1	4	4	4	5	4	4	3	3	3	4	1	1	4	4	1	4	5
2021-06-01	45	2	1	1	5	medecin	9	4	2	2	2	2	2	2	2	2	1	1	1	1	1	1	1	1	0	0	1	0	0	0	0	4	4	4	4	4	5	4	4	4	4	4	3	4	4	5	2	2	2
2021-04-07	27	1	2	1	5	medecin	5	5	2		2	2	2	2	2	2	1	1	1	1	1	1	1	1	0	0	1	0	0	0	0	1	1	1	4	1	4	4	1	4	1	1	1	1	4	2	1	1	4
2021-04-26	36	2	1	1	5	medecin	10	8	2	2	2	2	2	1	2	2	1	1	1	1	1	1	1	1	0	0	1	0	0	0	0	4	4	4	4	4	4	4	4	2	4	4	4	4	5	5	4	2	4
2021-05-05	28	2	1	1	4	infirmiere	5	2	2	2	2	2	2	2	1	2	1	1	1	1	2	1	0	0	1	0	1	0	0	0	0	1	4	2	4	4	4	4	5	4	4	4	1	1	4	4	2	1	1
2021-04-26	36	1	1	1	4	infirmiere	5	2	2		2	2	2	2	2	2	1	1	1	1	1	1	1	0	1	0	1	0	0	0	0	4	4	4	5	5	4	4	4	2	2	4	2	4	5	5	2	2	2
2021-04-26	40	2	1	1	4	sagef	7	5	2	2	2	2	2	2	2	2	1	1	1	1	1	1	1	0	1	0	1	0	0	0	0	2	5	4	4	4	4	4	4	2	4	4	4	4	5	5	2	2	4
2021-05-19	50	2	1	1	5	ats	4	4	2	2	2	2	2	2	2	1	1	1	1	1	1	1	0	1	1	0	1	0	0	0	0	2	4	2	4	4	4	4	4	2	2	4	4	2	4	4	2	2	2
2021-07-15	26	2	2	1	5	infirmiere	15	8	2	2	2	2	2	2	2	2	2	2	2	2	2	1	0	1	1	0	1	0	0	0	0	3	2	1	4	5	5	5	3	5	5	2	2	5	5	5	1	1	2
2021-03-24	46	2	1	1	5	medecin	11	3	2	2	2	1	2	2	2	2	1	1	1	1	2	1	1	1	1	0	1	0	0	0	0	4	4	4	4	4	4	5	5	2	5	4	1	4	4	5	1	4	4
2021-04-19	33	2	2	1	5	medecin	2	1	2	2	2	2	1	2	1	2	2	2	2	1	1	1	0	1	0	1	1	0	0	0	0	2	4	4	4	4	4	4	4	4	4	4	2	2	4	4	2	2	2
2021-04-07	25	1	2	1	5	infirmiere	8	3	1		2	2	2	2	2	2	1	2	1	2	2	1	0	1	0	1	1	0	0	0	0	4	1	1	5	3	4	4	5	4	5	5	1	2	4	4	4	1	4
2021-04-26	38	1	1	1	4	medecin	8	6	2		2	2	2	2	2	2	1	1	1	1	1	1	0	0	1	1	1	0	0	0	0	3	5	4	4	4	5	4	3	3	2	2	2	2	5	5	2	2	4
2021-07-07	34	1	1	1	4	infirmiere	4	2	2		2	2	2	2	1	2	1	1	1	1	2	1	0	1	1	1	1	0	0	0	0	4	4	4	5	4	4	2	4	2	2	4	2	2	4	4	4	2	2
2021-07-06	33	1	1	1	5	medecin	3	2	2		2	2	2	2	2	2	1	2	1	2	2	1	1	1	0	0	0	1	0	0	0	5	5	5	5	3	3	5	5	5	5	5	2	3	5	5	5	5	3
2021-05-18	38	1	1	1	4	biologiste	5	2	2		2	2	2	2	2	2	1	1	1	1	1	1	1	0	1	0	0	1	0	0	0	3	4	4	4	4	4	4	4	3	2	2	2	4	4	4	1	1	4
2021-06-01	32	2	2	1	5	sagef	12	8	2	2	2	2	2	2	2	2	1	2	1	2	2	1	0	1	1	0	0	1	0	0	0	2	2	2	4	4	4	4	4	4	4	4	4	2	4	4	2	2	2
2021-03-30	30	1	2	1	4	biologiste	5	3	2		2	2	2	2	2	2	1	1	1	1	1	1	0	0	0	0	1	1	0	0	0	2	4	3	4	4	4	4	4	3	4	2	2	2	4	4	2	2	5
2021-05-31	36	1	1	1	4	medecin	7	3	2		1	2	2	1	2	2	1	1	1	2	2	1	1	0	0	0	1	1	0	0	0	4	3	2	4	4	4	4	4	2	2	4	2	2	4	4	4	2	2
2021-05-05	50	2	1	1	5	infirmiere	10	6	2	2	1	2	2	2	1	2	2	1	1	2	2	1	1	0	0	0	1	1	0	0	0	3	4	3	4	4	4	4	3	2	4	4	3	2	4	1	2	2	2
2021-05-31	50	2	1	1	4	medecin	10	8	2	2	2	2	2	2	2	2	1	1	1	1	2	1	1	0	0	0	1	1	0	0	0	1	4	2	4	4	4	4	4	2	4	2	2	4	4	4	4	2	2
2021-04-17	27	2	2	1	4	infirmiere	10	3	2	2	2	2	2	2	1	2	1	1	1	2	2	1	0	0	1	0	1	1	0	0	0	2	4	2	4	4	5	4	2	2	4	4	2	2	4	4	2	2	2
2021-03-26	25	1	2	1	5	medecin	5	3	2		2	2	2	2	2	2	2	2	2	2	2	1	0	0	1	0	1	1	0	0	0	4	4	4	4	4	4	4	4	4	4	4	3	3	4	4	4	4	4
2021-04-21	37	1	1	1	4	medecin	6	3	2		2	2	2	2	2	2	1	1	1	1	1	1	0	0	1	0	1	1	0	0	0	4	4	4	4	4	4	4	4	4	3	4	4	4	5	4	2	2	2
2021-05-28	29	2	2	1	5	medecin	4	4	2	2	2	2	1	2	2	1	1	2	2	1	2	1	0	0	1	0	1	1	0	0	0	4	4	2	4	4	4	4	4	4	4	4	2	2	4	4	4	2	2
2021-05-05	45	1	1	1	4	infirmiere	6	4	2		2	2	2	2	2	2	1	1	1	1	1	1	0	0	1	0	1	1	0	0	0	4	4	4	4	4	4	4	2	2	2	4	2	2	5	4	2	2	4
2021-03-29	50	1	1	1	4	infirmiere	7	5	2		1	1	2	2	2	2	1	1	1	1	1	1	0	0	1	0	1	1	0	0	0	2	4	4	4	4	4	4	4	4	4	3	2	3	4	4	2	2	5
2021-04-21	37	1	2	1	4	medecin	5	5	2		2	2	2	2	2	2	1	1	1	1	1	1	0	0	1	0	1	1	0	0	0	3	4	4	4	4	4	3	3	2	3	2	2	2	4	4	2	2	3
2021-06-04	49	2	1	1	5	infirmiere	8	6	2	2	2	2	2	2	2	2	1	1	1	1	2	1	0	0	1	0	1	1	0	0	0	4	4	4	4	4	4	4	4	4	4	4	4	4	4	4	4	2	1
2021-07-06	29	1	2	1	5	medecin	12	7	2		2	2	2	2	2	2	2	1	2	2	2	1	0	0	1	0	1	1	0	0	0	4	4	4	4	2	4	4	2	2	4	4	2	2	4	4	2	2	4
2021-07-02	27	1	2	1	4	infirmiere	15	8	2		2	2	2	2	2	2	1	1	1	1	1	1	0	0	1	0	1	1	0	0	0	4	4	3	3	4	3	3	2	2	2	2	2	2	4	4	2	2	2
2021-06-28	29	1	2	1	5	medecin	17	9	2		2	2	1	2	2	2	1	1	1	2	2	1	0	0	1	0	1	1	0	0	0	1	4	5	4	1	1	2	5	4	5	1	1	5	4	4	2	2	2
2021-04-21	45	1	1	1	4	infirmiere	5	3	2		1	1	2	2	2	2	1	1	1	1	1	1	1	1	1	0	1	1	0	0	0	4	4	4	4	4	4	5	4	4	4	4	4	4	5	4	2	2	4
2021-05-28	23	2	1	1	5	medecin	5	2	2	2	2	2	2	2	2	2	1	1	1	1	1	1	0	0	0	1	1	1	0	0	0	4	4	4	5	5	5	4	4	2	2	4	2	2	4	4	4	2	2
2021-06-02	28	1	1	1	4	medecin	3	2	1		2	2	1	2	1	2	1	1	1	2	1	1	0	0	0	1	1	1	0	0	0	4	2	2	4	5	5	3	2	2	2	2	2	2	4	4	2	2	2
2021-04-19	30	2	1	1	5	sagef	3	3	2	2	2	2	2	2	2	1	1	2	1	1	1	1	0	0	0	1	1	1	0	0	0	4	4	4	4	4	4	4	4	2	4	2	2	2	4	4	4	2	2
2021-06-04	41	1	1	1	4	sagef	4	3	2		2	2	1	1	2	2	2	2	1	1	1	1	0	0	0	1	1	1	0	0	0	4	4	4	2	4	2	2	2	2	2	4	2	2	4	4	2	2	2
2021-05-24	46	2	1	1	4	sagef	6	3	2	2	2	2	2	2	2	1	1	2	2	1	1	1	0	0	0	1	1	1	0	0	0	4	2	2	4	4	4	4	4	4	4	2	2	2	4	4	2	2	2
2021-04-17	32	2	1	1	3	infirmiere	8	3	2	2	2	2	1	2	2	2	1	1	1	1	1	1	0	0	0	1	1	1	0	0	0	2	2	2	4	4	4	4	4	2	4	4	4	4	4	4	2	2	2
2021-05-05	49	2	1	1	5	medecin	9	3	1	2	2	1	2	2	2	2	1	2	2	1	2	1	0	0	0	1	1	1	0	0	0	4	4	4	4	4	4	4	4	4	4	4	4	4	4	4	2	2	4
2021-07-08	32	2	1	1	5	infirmiere	6	4	2	2	2	2	2	2	2	2	2	2	1	2	2	1	1	1	0	0	0	0	1	0	0	5	5	5	5	4	4	4	4	2	4	4	4	4	4	4	4	4	4
2021-04-07	56	2	1	1	5	infirmiere	15	12	2	2	2	2	2	2	2	2	2	2	2	2	2	1	1	1	0	0	0	0	1	0	0	4	4	4	5	5	5	4	4	4	4	5	4	4	5	4	4	1	3
2021-07-01	33	1	2	1	4	infirmiere	6	4	2		2	2	2	2	2	2	1	1	1	1	1	1	1	1	1	0	0	0	1	0	0	4	4	4	4	5	4	4	4	4	4	4	2	4	4	4	2	2	4
2021-06-04	38	2	3	1	5	sagef	7	4	2	2	2	2	2	2	2	2	1	2	1	2	2	1	0	1	0	1	0	0	1	0	0	2	2	2	4	4	4	4	4	4	4	2	2	2	4	4	4	2	2
2021-07-06	40	2	1	1	5	infirmiere	5	3	2	2	2	2	1	2	2	2	1	2	2	2	2	1	1	1	1	1	0	0	1	0	0	2	5	5	5	1	5	5	5	5	1	1	5	1	5	5	1	1	3
2021-03-29	26	2	1	1	5	infirmiere	2	2	1	2	2	2	1	2	1	2	2	2	2	2	2	1	0	0	1	0	1	0	1	0	0	2	4	4	4	4	4	4	4	2	2	2	2	2	4	4	2	2	4
2021-07-15	28	2	1	1	5	medecin	6	2	2	2	2	2	2	2	2	2	2	2	2	2	2	1	1	0	1	0	1	0	1	0	0	4	5	2	4	3	3	5	4	3	4	3	2	4	4	4	2	2	2
2021-04-07	21	2	2	1	5	infirmiere	6	3	1	2	2	2	2	2	2	2	2	1	1	1	1	1	0	0	0	1	1	0	1	0	0	1	1	1	5	1	4	4	4	4	4	4	4	1	4	4	1	4	4
2021-07-08	26	1	2	1	5	sagef	8	3	2		2	2	2	2	2	2	2	2	2	2	2	1	0	0	0	0	1	1	1	0	0	4	4	5	5	4	4	4	4	3	5	5	2	5	5	5	2	2	5
2021-05-19	56	1	1	1	4	ats	8	3	2		1	2	2	2	2	1	1	1	1	1	1	1	0	0	0	0	1	1	1	0	0	4	4	4	4	4	4	2	2	2	2	3	2	2	2	4	4	2	5
2021-07-14	38	2	1	1	5	sagef	15	10	2	2	2	2	2	2	2	2	1	1	1	2	2	1	0	0	0	0	1	1	0	1	0	4	4	4	4	4	4	4	4	2	4	4	2	3	5	5	1	1	1
2021-07-14	39	2	1	1	5	infirmiere	12	9	2	2	2	2	2	2	2	2	2	1	2	2	2	1	0	0	1	0	0	0	1	1	0	4	4	4	4	4	4	4	4	2	2	4	2	2	4	4	2	2	4
2021-05-31	30	2	1	1	4	infirmiere	8	5	2	2	2	2	1	1	1	2	1	1	1	2	2	1	0	1	1	0	0	0	1	1	0	2	4	4	4	4	3	4	4	2	2	2	2	2	4	4	4	2	2
2021-06-04	62	2	4	1	5	medecin	12	5	2	2	2	2	2	2	2	2	1	1	1	1	2	1	1	0	0	1	0	0	1	1	0	3	3	3	2	2	5	5	5	5	5	5	5	5	5	5	1	2	2
2021-05-18	35	2	1	1	5	infirmiere	5	2	2	1	2	2	1	2	2	2	1	2	1	1	1	1	0	0	0	0	1	0	1	1	0	4	4	4	4	4	4	4	4	4	4	4	4	4	4	4	4	2	5
2021-07-14	32	1	1	1	5	medecin	4	3	2		2	2	2	2	2	2	2	1	1	2	2	1	0	0	0	0	1	0	1	1	0	2	2	1	4	4	4	5	5	1	1	5	1	2	5	5	2	2	1
2021-05-26	31	2	4	1	4	infirmiere	6	2	2	2	2	2	2	2	2	2	1	1	1	1	1	1	1	1	0	0	0	0	0	0	1	4	4	4	4	4	4	4	4	2	2	4	4	4	4	4	4	2	2
2021-04-19	22	2	1	1	5	infirmiere	2	2	2	2	2	2	1	2	2	2	2	2	2	2	2	2	0	0	0	0	0	0	0	0	0	2	4	2	4	4	4	4	2	4	4	4	4	2	4	4	4	2	4
2021-04-20	25	2	1	1	4	medecin	3	2	2	2	2	2	1	2	2	2	2	1	1	2	2	2	0	0	0	0	0	0	0	0	0	2	4	4	4	4	2	2	2	2	2	4	2	2	4	4	4	2	4
2021-06-01	28	2	1	1	5	medecin	5	2	2	1	2	2	2	2	2	2	1	2	1	2	2	2	0	0	0	0	0	0	0	0	0	4	5	4	4	4	4	4	4	2	4	4	2	4	4	4	4	2	2
2021-07-15	31	2	1	1	5	sagef	4	2	2	1	2	2	2	1	2	2	2	2	2	2	2	2	0	0	0	0	0	0	0	0	0	5	5	5	5	5	5	4	4	4	4	4	4	3	5	5	2	2	3
2021-05-26	41	1	1	1	4	sagef	5	2	2		2	2	1	2	1	2	1	1	1	1	1	2	0	0	0	0	0	0	0	0	0	4	4	4	4	4	4	4	4	2	2	4	2	2	4	4	2	2	2
2021-05-31	32	2	1	1	4	sagef	2	2	2	2	2	2	2	2	2	2	1	1	1	2	1	2	0	0	0	0	0	0	0	0	0	4	4	4	4	4	4	4	4	4	4	4	4	4	4	4	4	4	4
2021-04-19	29	2	1	1	5	sagef	6	2	2	2	2	2	2	2	2	2	1	1	1	1	1	2	0	0	0	0	0	0	0	0	0	2	2	2	4	4	4	4	4	2	2	4	2	2	4	4	4	2	2
2021-06-01	34	2	1	1	5	sagef	5	2	2	2	2	2	2	2	1	2	1	1	1	1	2	2	0	0	0	0	0	0	0	0	0	2	4	4	4	4	4	4	4	2	4	4	2	4	4	4	2	2	2
2021-06-04	38	2	1	1	5	ats	3	2	2	2	2	2	2	2	2	2	1	1	1	1	1	2	0	0	0	0	0	0	0	0	0	4	4	4	4	4	3	4	2	2	2	4	2	4	4	4	2	2	1
2021-07-07	28	2	1	1	5	infirmiere	6	2	2	2	2	2	1	2	2	2	2	1	1	2	2	2	0	0	0	0	0	0	0	0	0	4	4	4	4	4	4	4	4	2	4	4	4	2	4	4	2	4	2
2021-07-08	34	2	1	1	5	infirmiere	5	2	2	2	2	2	2	2	2	2	2	2	2	2	2	2	0	0	0	0	0	0	0	0	0	5	2	2	3	5	2	3	5	2	2	2	2	5	2	2	2	2	3
2021-05-24	38	2	1	1	5	medecin	15	3	2	2	2	2	1	2	2	1	1	1	2	2	2	2	0	0	0	0	0	0	0	0	0	4	4	4	4	4	4	5	5	4	5	4	2	2	4	4	2	2	2
2021-07-01	27	1	2	1	5	sagef	3	3	2		2	2	2	2	2	2	2	2	2	2	2	2	0	0	0	0	0	0	0	0	0	4	4	4	4	4	4	2	2	2	2	2	2	2	3	4	2	2	2
2021-06-05	27	2	3	1	5	sagef	3	3	1	2	2	2	1	2	2	2	1	1	1	1	1	2	0	0	0	0	0	0	0	0	0	4	2	4	4	4	4	2	4	2	2	2	2	2	4	4	2	2	2
2021-04-17	47	2	4	1	4	ats	5	3	2	2	2	2	1	2	2	2	1	1	1	1	2	2	0	0	0	0	0	0	0	0	0	4	4	4	4	5	4	4	2	2	2	2	2	2	4	4	2	2	2
2021-07-07	28	2	1	1	5	infirmiere	6	3	2	1	2	2	2	2	2	2	1	1	1	2	2	2	0	0	0	0	0	0	0	0	0	4	2	2	5	4	4	5	4	2	5	4	4	4	4	4	2	2	2
2021-04-17	22	2	2	1	5	infirmiere	5	4	2	2	2	2	2	2	2	1	1	2	2	1	1	2	0	0	0	0	0	0	0	0	0	2	4	2	4	4	4	4	4	2	4	4	3	4	4	4	2	2	2
2021-05-24	39	2	3	1	5	medecin	8	4	2	2	2	2	1	1	1	2	1	1	1	1	1	2	0	0	0	0	0	0	0	0	0	2	4	4	4	4	4	4	4	4	4	4	2	2	4	4	2	2	2
2021-07-07	32	2	1	1	4	sagef	7	4	2	2	2	2	2	2	2	1	1	1	1	1	1	2	0	0	0	0	0	0	0	0	0	4	4	4	5	4	4	5	5	2	5	4	2	4	4	4	2	2	2
2021-07-06	29	2	1	1	5	sagef	5	4	2	2	2	2	1	2	2	2	2	2	2	2	2	2	0	0	0	0	0	0	0	0	0	2	2	2	4	4	3	3	2	2	2	3	2	3	4	5	1	1	4
2021-04-13	36	1	1	1	4	sagef	5	4	2		2	2	2	2	2	2	1	1	1	1	1	2	0	0	0	0	0	0	0	0	0	4	2	4	4	4	4	3	2	2	2	4	4	4	4	4	4	2	2
2021-05-27	34	2	1	1	5	sagef	6	4	2	2	2	2	1	2	2	1	2	1	1	2	2	2	0	0	0	0	0	0	0	0	0	2	4	3	4	4	3	4	4	4	4	4	2	3	4	4	4	2	2
2021-06-04	45	2	1	1	5	infirmiere	5	4	2	2	2	2	2	2	1	2	1	1	1	2	2	2	0	0	0	0	0	0	0	0	0	2	4	4	4	4	4	4	4	2	4	3	2	4	4	4	2	2	2
2021-07-08	29	2	1	1	5	infirmiere	7	4	2	2	2	2	1	2	1	2	1	2	2	2	2	2	0	0	0	0	0	0	0	0	0	2	3	3	3	3	3	3	2	2	2	2	2	2	3	3	4	2	3
2021-07-08	32	2	1	1	5	infirmiere	6	4	2	2	2	2	2	2	2	2	2	2	2	2	2	2	0	0	0	0	0	0	0	0	0	4	4	4	5	3	3	4	4	2	5	4	3	3	3	3	2	2	1
2021-03-29	22	2	2	1	5	infirmiere	8	5	2	2	2	2	2	2	2	2	2	2	2	2	2	2	0	0	0	0	0	0	0	0	0	2	3	3	4	4	4	3	2	2	2	2	2	1	4	4	4	2	4
2021-04-20	22	2	2	1	5	infirmiere	10	5	2	2	2	2	2	2	2	2	2	2	2	2	2	2	0	0	0	0	0	0	0	0	0	2	2	2	4	4	4	4	4	4	4	4	4	4	4	4	4	2	2
2021-05-19	21	2	2	1	5	infirmiere	6	5	1	2	2	2	2	2	2	2	1	2	2	2	2	2	0	0	0	0	0	0	0	0	0	4	4	2	4	4	4	4	4	2	4	4	4	2	4	4	2	2	2
2021-05-24	28	1	1	1	5	infirmiere	10	5	2		2	2	2	2	2	2	1	2	1	1	1	2	0	0	0	0	0	0	0	0	0	4	4	4	4	4	4	4	4	2	4	4	4	4	4	4	2	2	2
2021-06-04	40	2	1	1	5	sagef	9	5	2	2	2	2	2	2	2	2	1	2	1	2	2	2	0	0	0	0	0	0	0	0	0	2	4	2	4	2	2	3	2	2	2	2	2	2	4	4	2	2	2
2021-07-06	36	2	1	1	5	infirmiere	7	5	1	2	2	2	2	2	1	2	1	1	2	2	2	2	0	0	0	0	0	0	0	0	0	4	5	5	5	5	5	5	5	4	5	5	4	5	4	4	4	2	4
2021-07-08	27	2	2	1	5	sagef	6	5	2	2	2	2	2	2	1	2	2	2	1	2	2	2	0	0	0	0	0	0	0	0	0	2	4	2	4	2	2	5	5	2	5	5	2	5	5	5	2	2	2
2021-07-14	36	2	1	1	5	infirmiere	7	5	2	2	2	2	2	2	2	2	1	2	1	2	2	2	0	0	0	0	0	0	0	0	0	3	3	4	4	4	4	4	4	2	2	3	2	2	4	4	4	2	2
2021-05-19	29	2	2	1	5	sagef	17	7	2	2	2	2	2	2	2	2	2	2	2	2	2	2	0	0	0	0	0	0	0	0	0	2	2	2	4	4	4	4	4	4	4	4	4	4	4	4	2	2	2
2021-07-14	37	2	1	1	5	medecin	9	7	2	1	2	2	2	2	1	2	2	2	2	2	1	2	0	0	0	0	0	0	0	0	0	4	4	4	4	4	2	4	4	4	4	4	4	4	4	5	4	2	2
2021-07-01	31	2	1	1	5	infirmiere	12	10	2	2	2	2	1	2	2	2	2	2	2	2	2	2	0	0	0	0	0	0	0	0	0	4	4	4	4	4	4	4	4	4	4	4	4	4	4	4	4	2	4
2021-07-14	30	2	1	1	5	biologiste	10	6	2	2	2	2	2	2	1	2	1	1	1	1	2	1	0	0	1	0	0	0	0	0	0	2	4	3	5	5	4	4	3	2	4	4	2	4	5	5	4	1	2
2021-04-21	29	2	1	1	4	sagef	5	2	2	2	2	2	2	2	2	2	1	1	1	1	1	1	1	0	1	0	1	0	0	0	0	3	4	4	5	4	5	4	4	4	4	4	3	4	5	5	2	2	4
2021-05-24	51	2	1	1	5	medecin	8	2	2	2	1	2	2	2	2	2	1	1	1	1	1	1	0	0	1	1	1	0	0	0	0	4	4	2	4	4	4	4	4	2	4	2	2	2	4	4	4	2	2
2021-05-18	38	1	1	1	4	infirmiere	6	3	2		2	2	2	2	2	2	1	1	1	1	1	1	0	0	1	1	1	0	0	0	0	2	4	4	4	4	4	4	3	2	2	2	2	2	4	4	2	2	5
2021-05-05	38	2	1	1	5	infirmiere	5	3	2	2	2	2	2	2	2	2	1	1	2	1	2	1	0	1	0	0	1	1	0	0	0	1	2	2	4	4	2	4	4	1	1	4	1	1	5	4	1	1	2
2021-04-26	30	1	2	1	4	medecin	5	5	2		2	2	2	2	2	2	1	1	1	1	1	1	0	1	0	0	1	1	0	0	0	4	4	4	5	5	5	4	3	2	2	2	2	2	4	4	2	2	4
2021-05-31	40	1	1	1	5	sagef	5	3	1		2	2	2	2	2	2	1	1	1	1	1	1	1	1	0	0	1	1	0	0	0	1	4	2	4	4	4	2	4	2	2	2	2	2	4	4	4	1	2
2021-07-14	45	2	1	1	5	medecin	9	4	2	2	2	1	1	2	1	2	1	1	1	1	1	1	0	0	0	1	1	1	0	0	0	3	2	2	4	4	4	4	3	2	4	2	2	2	4	4	2	2	2
2021-07-02	25	1	2	1	4	sagef	10	7	2		2	2	2	2	2	2	1	2	1	1	1	1	0	1	0	0	1	0	0	1	0	2	2	2	4	2	2	1	5	4	4	2	4	4	4	4	2	2	2
2021-06-28	32	2	2	1	5	sagef	15	13	2	2	2	2	2	2	2	2	1	1	2	1	2	1	0	0	0	0	1	1	0	0	1	1	4	5	4	1	1	5	4	2	4	4	2	3	1	2	4	2	4
2021-07-01	25	1	2	1	4	infirmiere	1	1	2		2	2	2	2	2	2	1	1	1	2	2	2	0	0	0	0	0	0	0	0	0	4	4	4	4	4	4	3	3	2	2	2	2	4	4	4	1	1	1
2021-05-18	25	2	2	1	3	sagef	7	2	2	2	2	2	2	2	2	2	1	2	1	1	1	2	0	0	0	0	0	0	0	0	0	4	4	2	4	5	5	3	3	4	4	4	2	2	4	4	4	2	2
2021-05-20	24	2	2	1	5	infirmiere	4	3	1	2	2	2	2	2	2	1	1	1	2	1	1	2	0	0	0	0	0	0	0	0	0	2	4	2	4	4	4	4	4	4	4	4	4	2	4	4	2	2	2
2021-07-01	30	1	1	1	5	infirmiere	5	3	2		2	2	2	2	2	2	1	2	1	1	1	2	0	0	0	0	0	0	0	0	0	5	5	3	5	5	5	4	4	2	2	4	2	2	4	4	2	2	2
2021-07-14	28	2	1	1	5	infirmiere	6	4	2	2	2	2	2	2	1	2	2	1	2	1	2	2	0	0	0	0	0	0	0	0	0	4	4	4	4	4	4	4	4	4	4	4	4	4	4	4	2	2	4
2021-06-29	27	1	2	1	5	sagef	9	5	1		2	2	2	1	2	2	1	2	2	2	2	2	0	0	0	0	0	0	0	0	0	2	4	2	4	3	3	3	3	2	2	2	2	2	4	4	2	2	2
2021-07-01	37	1	1	1	5	infirmiere	5	5	2		2	2	2	2	2	2	2	2	2	2	2	2	0	0	0	0	0	0	0	0	0	4	3	4	4	3	4	2	4	2	2	4	2	3	4	4	2	2	2
2021-06-28	27	2	2	1	5	sagef	7	5	2	2	2	2	2	2	2	2	1	1	1	1	1	2	0	0	0	0	0	0	0	0	0	4	4	4	4	4	4	4	4	3	4	4	3	3	4	4	1	1	1
2021-07-14	27	2	2	1	5	medecin	6	5	2	2	2	2	2	2	2	2	2	2	2	2	2	2	0	0	0	0	0	0	0	0	0	2	4	3	5	4	4	5	4	2	5	4	4	4	5	5	4	2	2
2021-07-14	31	2	1	1	5	infirmiere	12	6	2	2	2	2	2	2	2	2	2	1	1	2	1	2	0	0	0	0	0	0	0	0	0	4	4	4	4	4	4	3	4	4	2	4	2	3	4	4	2	1	4
2021-06-01	60	2	1	1	5	medecin	9	7	2	2	1	1	2	2	2	2	1	1	1	1	1	2	0	0	0	0	0	0	0	0	0	1	5	1	5	4	4	4	4	2	4	4	3	4	4	4	2	1	1
2021-07-02	27	1	2	1	4	infirmiere	15	8	2		2	2	2	2	2	2	1	2	2	2	1	2	0	0	0	0	0	0	0	0	0	4	5	4	4	4	4	3	2	2	2	2	2	2	4	4	2	2	3
2021-05-28	30		1	1	5	medecin	30	15	2		2	1	1	1	1	1	1	1	1	2	1	2	0	0	0	0	0	0	0	0	0	4	4	4	4	4	4	5	4	2	4	4	4	4	4	4	4	2	2
2021-07-01	27	1	2	1	4	sagef	7	7	2		2	2	2	2	2	2	1	2	1	1	1	1	1	1	0	0	1	0	0	0	0	4	5	4	4	4	4	4	4	4	4	4	3	4	4	4	1	1	4
2021-06-28	25	1	2	1	5	infirmiere	10	6	2		2	2	2	2	2	2	2	1	1	2	2	1	0	0	1	0	1	1	0	0	0	4	2	5	3	3	2	1	4	4	2	2	1	5	5	4	5	2	1
2021-05-24	34	1	1	1	4	infirmiere	5	2	2		2	2	1	2	2	2	1	1	1	1	1	1	0	1	1	0	0	0	1	0	0	4	4	4	4	4	4	4	4	2	4	2	4	4	4	4	4	2	2
2021-07-14	28	2	1	1	5	infirmiere	5	3	2	2	2	2	2	2	2	2	1	1	2	2	2	1	0	0	0	0	1	1	1	0	0	4	4	4	4	4	4	3	4	2	4	2	4	3	4	4	2	2	2
2021-06-29	32	1	2	1	5	sagef	7	4	2		2	2	2	2	2	2	1	1	1	1	1	1	0	0	0	1	1	0	0	1	0	3	2	3	5	4	4	4	4	4	4	4	4	4	4	4	4	2	2
2021-04-03	39	1	1	1	4	biolog	6	2	2		2	2	2	2	2	2	1	1	1	1	2	2	0	0	0	0	0	0	0	0	0	2	1	1	4	4	5	3	2	2	2	4	4	2	4	4	4	2	2
2021-06-28	37	1	1	1	5	sagef	10	6	2		2	2	2	2	2	2	1	1	2	2	2	2	0	0	0	0	0	0	0	0	0	4	4	4	4	5	5	1	4	2	4	5	2	4	4	4	4	2	2
2021-06-29	32	2	1	1	5	medecin	6	6	2	1	2	2	1	2	1	2	1	1	1	1	1	2	0	0	0	0	0	0	0	0	0	4	5	5	5	4	4	4	5	3	5	4	4	4	4	4	2	2	2
2021-03-30	38	2	1	1	4	sagef	15	10	2	2	2	2	2	2	2	2	2	1	1	1	1	2	0	0	0	0	0	0	0	0	0	4	4	4	4	4	4	5	3	2	5	3	2	2	4	4	2	2	1
2021-06-01	56	2	1	1	5	sagef	12	7	2	2	2	1	2	2	2	2	1	1	1	1	1	1	1	0	1	0	0	0	0	0	0	2	5	2	4	4	4	4	4	2	4	2	2	2	5	4	4	2	1
2021-06-04	56	2	1	1	4	ats	7	4	2	2	1	2	1	2	2	2	1	1	1	1	1	1	1	1	1	0	0	0	0	0	0	4	5	4	5	4	4	4	4	2	4	4	2	4	4	4	2	2	2
2021-05-24	42	1	1	1	5	medecin	6	4	2		1	2	2	2	2	2	1	1	1	1	1	1	1	1	1	0	0	0	0	0	0	4	4	4	4	4	4	4	4	4	4	4	4	4	5	5	4	2	2
2021-05-18	50	2	1	1	5	infirmiere	15	11	2	2	2	1	2	2	1	2	1	1	1	1	1	1	1	1	1	0	0	0	0	0	0	4	5	4	4	4	4	4	4	2	4	4	3	4	4	4	2	2	2
2021-05-24	45	1	1	1	5	medecin	10	2	2		2	2	2	2	2	2	1	1	1	2	2	1	1	1	1	1	0	0	0	0	0	2	4	2	4	4	3	5	4	2	4	4	2	2	5	4	4	2	5
2021-07-08	32	1	1	1	4	sagef	6	2	2		2	2	2	2	2	2	1	1	1	1	1	1	1	1	1	1	0	0	0	0	0	3	5	4	4	4	4	4	4	3	4	4	2	4	5	5	2	2	2
2021-03-30	28	1	2	1	4	ats	2	2	2		2	2	2	2	2	2	1	1	1	1	1	1	0	0	1	0	1	0	0	0	0	4	4	4	4	4	4	4	4	2	2	4	2	2	4	4	2	2	2
2021-07-06	32	1	1	1	4	ats	4	2	2		2	2	2	2	2	1	1	1	1	1	1	1	1	0	1	0	1	0	0	0	0	3	5	4	5	5	4	5	4	4	5	4	2	2	4	5	1	1	4
2021-05-24	58	2	1	1	5	infirmiere	5	5	2	2	2	2	1	2	1	1	1	1	1	1	2	1	0	1	0	1	1	0	0	0	0	4	4	4	4	4	4	4	4	4	2	2	2	2	4	4	4	4	4
2021-05-31	40	1	1	1	5	sagef	15	10	2		2	2	2	2	2	2	1	1	1	2	2	1	0	1	0	1	1	0	0	0	0	1	4	2	4	4	4	4	4	2	4	4	2	4	4	4	4	1	2
2021-04-06	60	2	1	1	5	medecin	8	4	2	2	2	2	2	2	2	1	1	1	1	2	2	1	0	0	1	1	1	0	0	0	0	2	4	2	4	5	5	4	4	3	4	2	2	2	4	4	1	4	2
2021-06-28	34	1	1	1	5	medecin	10	6	2		2	2	2	2	2	2	1	2	2	2	2	1	1	1	0	0	0	1	0	0	0	4	4	4	4	4	4	3	3	2	2	3	2	2	4	4	2	2	3
2021-07-14	40	2	1	1	5	medecin	9	6	2	2	1	2	2	2	2	2	1	1	2	2	2	1	1	0	1	0	0	1	0	0	0	4	5	3	4	4	4	4	4	4	4	4	4	4	4	2	2	2	3
2021-05-18	40	2	1	1	4	medecin	8	3	2	2	2	2	2	2	2	2	1	1	1	1	1	1	1	0	0	0	1	1	0	0	0	3	5	4	4	4	4	4	3	3	2	3	2	3	5	4	2	2	4
2021-03-30	38	1	1	1	4	infirmiere	3	2	2		2	2	2	2	2	2	1	1	1	1	1	1	1	0	1	0	1	1	0	0	0	2	5	4	4	3	4	5	4	3	4	4	2	4	4	4	2	2	5
2021-07-05	35	1	1	1	4	infirmiere	8	5	2		2	2	2	2	2	2	1	1	1	1	1	1	1	0	1	0	1	1	0	0	0	4	5	3	5	4	4	4	4	4	4	4	3	3	4	4	2	2	2
2021-05-31	28	1	2	1	4	sagef	2	2	2		2	2	2	2	2	2	1	1	1	1	1	1	0	0	0	1	1	1	0	0	0	4	2	2	2	2	4	4	2	2	2	2	2	2	4	4	4	4	2
2021-06-29	30	1	2	1	5	medecin	6	4	2		2	2	2	2	2	2	1	1	2	1	2	1	0	0	0	1	1	1	0	0	0	2	4	4	4	4	3	4	4	2	2	3	2	2	4	4	4	2	4
2021-07-14	41	1	1	1	5	medecin	9	4	2		2	2	1	2	2	2	1	1	1	2	1	1	1	1	1	1	1	1	0	0	0	4	4	4	4	4	4	5	4	4	4	4	4	4	5	5	2	2	2
2021-05-31	50	2	1	1	5	medecin	9	5	2	2	2	2	1	2	2	2	1	1	1	1	2	1	0	0	1	0	1	0	1	0	0	2	4	2	4	4	4	3	2	2	2	2	2	2	4	4	2	2	1
2021-07-06	35	1	2	1	4	infirmiere	6	6	2		2	2	2	2	2	2	1	1	1	1	1	1	0	0	0	0	1	1	1	0	0	3	5	3	5	4	4	4	3	2	2	3	2	2	4	4	2	2	2
2021-03-24	35	2	1	1	4	infirmiere	4	1	2	2	2	2	2	2	2	2	1	1	1	2	2	2	0	0	0	0	0	0	0	0	0	3	4	4	4	2	4	4	4	4	4	4	4	4	4	4	4	4	4
2021-07-02	28	1	2	1	4	infirmiere	1	1	2		2	2	2	2	1	2	1	1	2	1	1	2	0	0	0	0	0	0	0	0	0	4	4	4	5	4	4	4	2	1	3	2	1	1	4	4	1	2	2
2021-05-28	32	2	1	1	5	infirmiere	3	2	2	2	2	2	2	2	2	2	1	2	2	1	1	2	0	0	0	0	0	0	0	0	0	4	4	4	4	4	2	4	4	4	4	4	4	4	4	4	2	2	2
2021-03-30	34	2	1	1	3	sagef	7	3	1	2	2	2	2	2	2	2	2	1	1	2	2	2	0	0	0	0	0	0	0	0	0	2	4	4	4	4	4	5	4	2	5	5	4	4	4	4	2	4	5
2021-07-01	45	1	1	1	5	sagef	8	5	2		2	1	2	2	2	2	1	2	1	2	2	2	0	0	0	0	0	0	0	0	0	4	4	4	4	4	4	4	4	3	4	4	4	2	4	4	4	2	4
2021-07-06	50	2	1	1	5	sagef	10	7	2	2	1	2	1	2	2	2	1	2	2	2	2	2	0	0	0	0	0	0	0	0	0	4	4	3	4	3	4	5	5	2	3	4	2	4	3	4	2	2	4
2021-07-14	37	2	1	1	5	medecin	12	7	2	2	2	2	2	2	2	2	1	1	1	2	2	2	0	0	0	0	0	0	0	0	0	4	4	4	4	4	4	4	2	2	2	2	2	4	4	4	2	2	2
2021-06-28	42	2	1	1	5	infirmiere	13	9	2	2	2	1	2	2	2	2	2	1	1	2	2	2	0	0	0	0	0	0	0	0	0	1	4	5	5	5	3	2	4	2	1	4	4	3	4	5	4	2	2
2021-07-14	36	2	1	1	5	sagef	15	10	2	2	2	2	1	2	2	2	2	1	2	2	2	2	0	0	0	0	0	0	0	0	0	2	4	2	4	4	2	4	4	2	4	1	2	4	4	4	2	2	2
2021-06-02	39	1	1	1	4	medecin	7	3	2		2	2	1	2	1	2	1	1	1	1	1	1	0	0	0	1	1	1	0	0	0	4	2	2	4	3	2	4	2	2	2	4	2	4	4	4	4	2	2
2021-07-14	30	1	2	1	5	medecin	1	1	2		2	2	2	2	1	2	1	1	1	1	1	1	0	1	0	1	1	1	0	0	0	4	4	4	5	5	5	4	4	2	3	2	2	4	4	4	2	2	2
2021-07-14	28	2	1	1	5	medecin	7	4	2	2	2	2	2	2	2	2	2	2	1	2	2	2	0	0	0	0	0	0	0	0	0	4	4	5	4	4	4	3	4	2	4	4	2	3	2	2	4	2	4
2021-05-24	65	2	4	1	4	medecin	20	6	2	2	2	2	2	2	2	2	1	1	1	1	1	1	0	0	1	0	0	0	0	0	0	1	4	2	5	4	4	4	4	2	4	2	2	2	4	2	2	2	2
2021-05-31	60	2	1	1	4	medecin	18	7	2	2	2	1	2	2	2	2	1	1	1	1	1	1	1	0	1	0	0	0	0	0	0	2	5	4	4	4	4	3	4	2	2	2	2	2	4	4	2	2	2
2021-07-01	40	1	1	1	4	medecin	4	3	2		2	2	2	2	2	2	1	1	1	1	1	1	1	1	1	0	0	0	0	0	0	2	5	4	5	4	4	4	4	3	4	4	2	2	5	5	1	1	1
2021-07-02	31	1	2	1	4	medecin	3	3	2		2	2	2	2	2	2	1	1	1	1	1	1	1	1	1	1	0	0	0	0	0	3	3	2	5	5	4	4	4	4	4	4	2	2	5	5	1	1	1
2021-04-01	40	1	1	1	4	medecin	3	2	2		2	2	2	2	2	2	1	1	1	1	2	1	0	0	0	0	1	0	0	0	0	4	4	4	4	4	4	4	2	2	4	4	2	2	4	4	2	2	2
2021-06-28	26	1	2	1	4	medecin	2	2	2		2	1	1	2	2	2	1	1	1	1	1	1	1	0	1	0	1	0	0	0	0	4	5	5	4	4	4	1	1	1	1	1	1	1	3	3	2	2	2
2021-07-05	40	1	1	1	4	medecin	5	2	2		2	2	2	2	2	2	1	1	1	1	1	1	1	0	1	0	1	0	0	0	0	4	4	4	4	4	4	4	4	2	4	4	2	3	4	4	2	2	2
2021-05-26	43	1	1	1	4	medecin	9	4	2		2	2	2	2	2	2	1	1	1	1	1	1	1	0	1	0	1	0	0	0	0	4	4	4	4	4	4	4	4	2	3	4	1	1	4	4	4	2	2
2021-06-08	38	1	1	1	4	infirmiere	9	7	2		2	2	1	2	2	2	1	1	1	2	2	1	0	1	1	0	1	0	0	0	0	4	4	4	4	4	4	4	2	2	2	4	2	2	4	4	4	2	2
2021-06-05	42	1	1	1	4	medecin	6	2	2		1	2	2	2	2	1	1	1	1	1	1	1	0	0	1	1	1	0	0	0	0	4	4	4	4	4	4	2	2	4	4	3	1	1	4	4	4	2	2
2021-04-26	40	2	1	1	4	medecin	9	2	2	2	2	2	2	2	1	2	1	1	1	2	2	1	0	0	1	1	1	0	0	0	0	4	4	4	4	4	4	4	4	4	4	2	2	4	4	4	2	2	2
2021-06-08	34	2	1	1	5	medecin	9	3	2	2	2	2	2	1	1	1	1	1	2	2	2	1	0	0	1	1	1	0	0	0	0	4	2	2	4	2	2	4	4	4	4	4	4	4	4	4	4	2	2
2021-06-29	45	1	1	1	4	medecin	8	3	1		2	2	2	2	2	2	1	1	1	1	1	1	0	0	1	1	1	0	0	0	0	3	4	2	5	4	3	3	4	2	1	3	2	2	4	4	2	2	4
2021-07-02	30	1	2	1	4	medecin	2	2	2		2	2	2	2	2	2	1	1	1	1	1	1	1	0	1	0	0	1	0	0	0	2	5	4	4	4	4	3	3	2	2	4	2	2	4	4	2	2	2
2021-06-04	57	1	1	1	4	medecin	10	6	2		2	2	2	2	2	2	1	1	1	1	1	1	1	0	1	0	0	1	0	0	0	2	5	4	5	4	4	5	4	4	4	4	2	4	4	4	1	1	1
2021-05-24	36	1	1	1	4	medecin	6	2	2		2	1	1	2	1	2	1	1	1	1	1	1	1	0	0	0	1	1	0	0	0	4	4	4	4	4	4	4	4	4	4	4	4	4	5	5	2	2	2
2021-06-29	27	2	1	1	4	infirmiere	5	2	2	2	2	2	2	2	2	2	1	1	1	1	1	1	1	0	0	0	1	1	0	0	0	2	5	4	4	4	4	4	4	4	4	4	4	4	4	4	2	2	2
2021-07-01	27	1	2	1	4	medecin	4	2	1		2	2	2	2	2	2	1	1	1	1	1	1	1	0	0	0	1	1	0	0	0	4	4	4	4	4	4	4	4	4	4	4	4	4	4	4	1	1	4
2021-07-08	35	1	1	1	4	medecin	5	2	2		2	2	2	2	2	2	1	1	1	1	1	1	1	0	0	0	1	1	0	0	0	4	5	4	5	4	4	4	4	4	4	4	2	4	4	4	2	2	2
2021-05-24	58	2	4	1	5	sagef	8	3	2	2	2	2	1	2	2	1	1	2	1	2	2	1	0	1	0	0	1	1	0	0	0	2	3	3	5	5	5	5	5	4	5	1	1	3	4	4	1	2	4
2021-06-04	56	1	1	1	4	medecin	6	3	2		2	2	2	2	2	2	1	1	1	1	1	1	1	0	1	0	1	1	0	0	0	2	5	4	4	4	4	4	4	2	4	3	2	2	5	4	2	2	2
2021-04-19	33	1	1	1	4	medecin	4	2	2		2	2	1	2	2	1	2	2	2	2	2	1	0	0	0	1	1	1	0	0	0	4	4	4	4	4	4	4	4	2	4	4	2	4	4	4	2	2	2
2021-04-30	37	2	1	1	5	infirmiere	6	2	2	2	2	2	2	2	2	2	1	1	1	1	1	1	0	0	0	1	1	1	0	0	0	2	2	4	4	4	4	4	4	4	4	2	2	2	4	4	4	2	2
2021-06-03	52	1	1	1	4	medecin	6	3	2		2	2	2	2	1	1	1	1	1	1	1	1	0	1	1	0	0	0	1	0	0	2	2	2	4	4	4	2	4	2	4	4	2	2	4	4	4	2	2
2021-07-01	44	1	1	1	4	sagef	14	7	2		2	2	1	2	2	2	1	1	2	2	2	1	0	1	1	0	0	0	1	0	0	4	4	4	4	4	4	4	4	2	4	4	4	4	4	4	2	2	2
2021-06-04	40	2	1	1	5	medecin	6	5	2	2	2	2	2	2	2	1	2	2	1	1	1	1	0	1	0	1	0	0	1	0	0	2	4	2	4	4	4	4	4	4	4	4	4	2	4	4	4	2	2
2021-07-01	36	1	1	1	4	medecin	13	8	2		2	2	1	2	2	2	1	1	1	1	2	1	0	0	1	0	1	0	1	0	0	4	4	4	4	4	2	4	2	2	4	4	2	2	4	4	2	2	2
2021-05-24	50	2	1	1	4	medecin	7	4	2	2	2	1	2	2	2	2	1	1	1	2	2	1	0	1	1	0	0	0	0	1	0	2	2	2	4	5	5	4	2	2	4	4	2	2	4	4	4	2	2
2021-05-18	41	2	1	1	4	medecin	9	5	2	2	2	2	2	2	2	2	1	1	1	1	1	1	0	0	0	0	0	1	1	1	0	2	3	4	5	5	5	3	3	1	1	3	1	1	4	4	2	2	2
2021-08-18	35	1	1	1	4	infirmiere	20	9	2		2	2	2	2	2	2	1	1	1	1	1	1	0	0	0	0	0	0	0	0	1	4	4	4	4	4	4	5	5	2	4	4	4	2	4	4	1	2	4
2021-04-26	52	1	1	1	4	infirmiere	12	5	2		2	2	2	2	1	2	1	1	1	1	2	1	0	1	0	1	1	0	0	0	1	4	4	4	4	4	4	5	2	2	2	2	2	2	4	4	4	2	2
2021-07-07	62	2	1	1	4	medecin	20	5	2	2	2	1	1	2	2	2	1	1	1	1	1	1	1	0	1	0	0	1	0	0	1	4	5	4	5	4	4	5	4	4	4	4	4	4	3	3	4	2	2
2021-06-01	32	1	2	1	4	medecin	2	2	1		2	2	2	2	2	2	1	1	1	1	1	2	0	0	0	0	0	0	0	0	0	4	4	4	4	4	4	4	4	4	4	4	4	4	4	4	4	4	4
2021-06-01	29	1	1	1	5	medecin	4	2	2		2	2	2	2	2	2	1	1	2	2	2	2	0	0	0	0	0	0	0	0	0	2	2	2	4	4	4	4	2	4	4	2	2	2	4	4	2	2	2
2021-04-01	42	1	1	1	4	medecin	7	2	2		2	2	2	2	2	2	1	1	1	1	1	2	0	0	0	0	0	0	0	0	0	1	1	3	5	4	4	3	3	2	3	2	2	2	4	4	2	2	2
2021-05-31	26	2	1	1	4	infirmiere	4	2	2	2	2	2	2	2	2	2	2	2	2	1	2	2	0	0	0	0	0	0	0	0	0	2	2	2	4	4	3	4	4	2	2	2	2	2	2	2	2	2	2
2021-06-01	40	1	1	1	4	infirmiere	5	2	2		2	2	1	2	2	2	1	1	1	1	1	2	0	0	0	0	0	0	0	0	0	4	4	4	3	4	2	2	2	1	2	2	1	1	4	3	2	2	2
2021-06-01	32	2	1	1	4	medecin	5	2	2	2	2	2	1	2	1	2	2	1	2	2	2	2	0	0	0	0	0	0	0	0	0	4	4	4	3	4	4	4	2	2	4	4	2	2	4	4	2	2	2
2021-03-31	42	2	3	1	5	sagef	6	3	1	2	2	2	2	2	2	2	1	1	1	2	2	2	0	0	0	0	0	0	0	0	0	2	2	2	2	4	4	4	4	4	4	4	4	4	4	4	4	2	2
2021-06-01	42	2	1	1	5	sagef	8	3	2	2	2	2	2	2	1	1	2	1	1	1	1	2	0	0	0	0	0	0	0	0	0	4	4	4	4	4	4	4	4	2	4	4	2	4	4	4	2	2	2
2021-04-20	36	2	1	1	4	infirmiere	7	3	2	1	2	2	2	2	2	2	2	2	2	2	2	2	0	0	0	0	0	0	0	0	0	2	4	2	4	2	4	4	4	4	4	4	2	2	4	4	2	2	4
2021-05-31	48	2	1	1	5	medecin	5	4	2	2	2	2	2	2	2	2	1	1	1	1	1	2	0	0	0	0	0	0	0	0	0	2	2	2	5	4	4	3	2	2	2	2	2	2	4	4	2	2	1
2021-06-03	38	2	1	1	5	sagef	9	4	2	2	2	2	1	2	2	2	1	1	2	1	1	2	0	0	0	0	0	0	0	0	0	4	4	4	4	4	4	4	4	4	4	4	2	2	4	4	2	2	2
2021-04-26	42	2	1	1	5	medecin	10	5	2	2	2	1	2	2	2	2	2	2	1	2	2	2	0	0	0	0	0	0	0	0	0	4	4	4	4	4	4	4	2	2	4	2	2	2	4	4	2	2	2
2021-05-29	69	2	1	1	4	infirmiere	15	10	2	2	1	2	2	1	2	2	1	1	1	2	2	2	0	0	0	0	0	0	0	0	0	2	2	2	4	4	4	2	4	2	2	2	2	2	4	4	4	2	2
2021-06-08	40	2	1	1	5	infirmiere	6	2	2	2	2	2	2	2	1	2	2	1	1	2	1	1	0	1	1	1	0	0	0	0	0	4	4	4	2	4	4	4	2	2	4	4	2	2	4	4	2	2	2
2021-03-24	40	1	1	1	4	infirmiere	7	4	2		2	2	2	2	2	2	1	2	1	1	2	1	0	0	1	0	0	0	0	0	0	3	4	4	4	4	4	4	4	2	2	4	2	2	4	4	2	4	2
2021-06-28	32	2	1	1	4	sagef	6	4	2	1	2	2	2	2	2	2	1	1	1	2	2	1	0	1	1	1	0	0	0	0	0	2	1	1	4	4	4	2	2	2	2	2	2	2	4	4	2	2	3
2021-06-28	32	2	1	1	5	medecin	7	3	2	2	2	2	2	2	1	2	1	2	2	2	2	1	0	1	1	0	1	0	0	0	0	2	2	2	4	4	4	2	2	2	2	2	2	2	2	4	4	2	2
2021-06-28	42	2	1	1	5	medecin	8	5	2	2	2	2	1	2	2	2	1	1	1	2	2	1	0	1	1	0	1	0	0	0	0	4	4	4	4	4	4	4	4	4	4	2	2	2	4	4	4	2	2
2021-04-29	45	2	1	1	3	medecin	3	1	2	2	1	1	2	2	2	2	1	1	1	2	2	1	0	1	0	1	1	0	0	0	0	4	4	4	4	4	5	4	4	5	4	4	1	1	4	4	2	2	4
2021-06-28	26	2	2	1	4	biologiste	5	3	2	2	2	2	2	1	2	2	1	1	1	1	1	1	1	0	1	0	0	1	0	0	0	4	4	4	4	4	4	1	1	1	1	1	1	1	4	4	1	1	1
2021-05-24	33	1	1	1	4	medecin	2	2	1		2	2	2	2	2	2	1	1	1	1	1	1	0	0	1	1	0	1	0	0	0	4	4	4	4	4	4	4	4	2	4	4	2	2	4	4	4	2	4
2021-07-06	36	1	1	1	4	medecin	6	4	2		2	2	2	2	2	2	1	1	1	1	1	1	1	0	0	0	1	1	0	0	0	4	5	5	5	5	5	5	4	4	4	4	3	4	4	4	2	2	2
2021-05-03	38	1	1	1	4	sagef	5	3	2		2	1	2	2	2	2	1	1	2	1	2	1	0	1	0	0	1	1	0	0	0	1	1	1	4	1	1	4	4	1	1	4	1	1	5	1	1	1	2
2021-07-02	28	1	2	1	4	medecin	3	2	2		2	2	2	2	2	2	1	1	1	1	1	1	0	0	1	0	1	1	0	0	0	2	5	2	4	4	4	2	2	2	2	2	2	2	4	4	2	2	1
2021-07-02	30	1	2	1	4	medecin	8	5	2		2	2	2	2	2	2	1	1	1	1	1	1	0	0	1	0	1	1	0	0	0	4	4	4	2	4	3	1	1	1	1	1	1	1	4	4	2	2	2
2021-06-04	31	1	2	1	4	sagef	6	3	2		2	2	1	2	2	2	1	1	1	1	1	1	0	0	0	1	1	1	0	0	0	4	4	4	4	4	4	2	2	2	3	4	2	2	4	5	4	2	2
2021-06-25	25	1	2	1	4	infirmiere	1	1	2		2	2	2	2	2	2	1	1	1	1	1	1	0	0	0	1	0	1	0	1	0	4	4	4	4	4	2	4	2	2	4	4	4	4	4	4	2	2	4
2021-07-01	41	1	1	1	4	ats	6	5	2		2	1	2	2	2	2	1	1	1	1	1	1	1	0	0	0	0	1	0	0	1	3	5	4	4	4	4	2	4	2	4	4	2	4	4	4	2	2	2
2021-05-18	45	2	1	1	3	infirmiere	3	1	2	2	2	1	1	2	2	2	1	1	2	1	1	1	0	0	0	0	1	0	1	0	1	4	4	5	5	4	4	4	5	2	5	4	1	2	4	4	1	2	2
2021-06-08	50	2	1	1	5	medecin	6	1	1	2	2	2	2	2	2	2	1	1	1	2	2	2	0	0	0	0	0	0	0	0	0	2	2	2	4	4	4	4	4	4	4	4	2	2	4	4	2	2	2
2021-03-26	31	2	1	1	5	medecin	6	2	2	2	2	2	2	2	2	2	2	1	1	2	2	2	0	0	0	0	0	0	0	0	0	4	4	4	5	4	4	5	4	2	4	4	2	4	4	4	2	2	3
2021-06-25	24	2	1	1	5	medecin	4	2	1	1	2	1	1	2	2	2	2	2	2	2	2	2	0	0	0	0	0	0	0	0	0	2	3	4	4	4	4	4	4	2	4	4	2	4	4	4	4	2	2
2021-05-19	31	2	1	1	4	infirmiere	6	2	2	2	2	2	1	2	2	2	1	1	1	2	2	2	0	0	0	0	0	0	0	0	0	2	4	4	4	4	4	4	4	2	4	2	2	2	4	4	2	2	2
2021-07-02	35	1	1	1	4	medecin	4	2	2		2	2	2	2	2	2	1	1	1	1	1	1	1	1	1	0	0	0	0	0	0	4	5	4	4	4	4	4	4	4	2	4	2	4	4	4	2	2	2
2021-03-25	27	1	1	1	4	infirmiere	4	3	2		2	2	1	2	1	2	1	2	1	1	1	1	0	0	1	0	1	0	0	0	0	5	1	4	4	4	4	5	2	2	4	4	2	1	4	2	4	4	2
2021-05-26	55	2	4	1	5	medecin	6	4	2	2	2	1	2	2	1	2	1	1	1	1	1	1	0	0	1	1	1	0	0	0	0	4	4	4	4	4	4	4	4	4	4	4	4	4	4	4	4	2	2
2021-07-01	40	1	1	1	4	medecin	6	3	2		2	2	2	2	2	2	1	1	1	1	1	1	0	1	0	1	0	1	0	0	0	4	4	4	4	4	4	2	2	2	2	2	2	2	4	4	4	2	4
2021-04-26	42	2	1	1	5	medecin	13	5	2	2	2	2	2	2	2	2	1	1	1	1	1	1	0	0	1	1	0	1	0	0	0	2	2	2	4	4	4	5	4	4	4	2	2	2	4	4	2	2	2
2021-05-31	33	1	1	1	4	sagef	8	7	2		2	2	1	2	2	2	1	1	1	1	1	1	0	0	0	1	1	1	0	0	0	4	4	4	4	4	4	4	4	2	4	4	2	2	4	4	4	2	2
2021-03-30	55	1	1	1	4	sagef	9	5	2		1	2	2	2	2	2	1	1	1	1	1	1	1	0	0	1	0	0	1	0	0	3	3	3	5	5	5	3	3	2	4	2	2	2	2	4	2	2	2
2021-06-04	37	2	3	1	4	infirmiere	2	2	2	2	2	2	1	1	1	2	1	1	1	1	1	1	0	0	0	0	1	1	1	0	0	4	2	2	4	4	3	2	2	2	2	3	2	2	3	3	4	2	2
2021-04-30	48	2	1	1	5	medecin	8	6	2	2	2	2	2	2	2	2	1	1	1	2	2	1	0	1	1	0	0	0	0	0	1	4	4	4	4	4	4	4	4	2	4	4	2	2	4	4	4	2	2
2021-08-18	34	2	1	1	5	infirmiere	7	3	2	2	1	2	2	2	1	2	1	1	1	1	2	1	0	0	0	1	1	0	0	0	1	2	4	2	4	4	4	4	4	2	4	4	4	3	4	4	4	2	2
2021-06-08	35	1	1	1	5	infirmiere	3	2	2		2	2	2	2	2	1	1	1	1	1	2	2	0	0	0	0	0	0	0	0	0	4	2	4	4	4	4	4	4	2	4	2	2	2	4	4	2	2	2
2021-06-05	41	2	1	1	4	medecin	2	2	2	2	2	1	1	2	1	2	1	1	1	1	1	2	0	0	0	0	0	0	0	0	0	4	4	4	4	4	4	2	2	2	4	4	2	2	4	4	2	2	2
2021-05-21	63	2	1	1	5	medecin	3	3	2	2	1	1	2	2	2	2	1	1	1	1	1	2	0	0	0	0	0	0	0	0	0	4	4	4	4	4	4	4	4	4	4	4	4	4	4	4	4	4	4
2021-05-31	67	2	4	1	5	infirmiere	3	3	2	2	2	1	2	2	1	2	1	2	1	1	1	2	0	0	0	0	0	0	0	0	0	4	4	4	4	2	4	4	2	2	2	4	2	2	4	4	4	4	2
2021-04-20	34	2	1	1	4	sagef	6	3	2	2	2	2	1	2	2	2	1	2	2	2	2	2	0	0	0	0	0	0	0	0	0	4	4	2	4	4	4	4	4	2	4	4	2	2	4	4	2	2	4
2021-07-01	38	2	1	1	4	medecin	7	3	2	2	2	2	2	2	1	2	2	1	1	1	1	2	0	0	0	0	0	0	0	0	0	4	4	4	3	4	4	2	2	2	2	2	2	2	4	4	4	2	2
2021-07-01	36	2	1	1	5	biolog	16	4	2	2	1	2	2	2	2	2	1	1	1	2	2	2	0	0	0	0	0	0	0	0	0	2	2	2	4	4	2	4	2	2	4	4	2	2	4	4	4	2	2
2021-03-24	50	2	1	1	5	infirmiere	10	5	2	2	2	2	1	2	2	1	2	2	1	2	2	2	0	0	0	0	0	0	0	0	0	4	4	4	5	3	5	5	4	4	1	3	1	3	4	4	4	4	4
2021-03-24	27	1	2	1	4	infirmiere	13	12	2		2	2	2	2	2	2	1	1	1	1	1	1	0	0	1	0	1	0	0	0	0	1	1	1	4	4	4	4	4	2	3	1	4	2	4	4	2	4	1
2021-05-03	54	2	1	1	4	medecin	12	4	2	2	2	2	2	2	2	2	1	1	1	1	1	1	1	1	0	0	0	0	1	0	0	1	1	1	1	1	1	1	1	1	1	1	1	1	4	4	2	1	1
2021-05-29	50	2	4	1	5	medecin	19	6	2	2	1	1	1	2	2	2	1	1	1	1	1	1	0	1	1	1	0	0	0	0	0	4	4	4	4	4	4	2	2	2	2	2	2	2	4	4	4	4	4
2021-03-24	35	2	2	1	3	medecin	15	12	2	1	2	2	1	2	2	2	1	1	1	2	2	1	1	1	0	0	1	0	0	0	0	1	4	2	4	4	4	4	4	2	4	4	5	2	4	4	2	2	2
2021-06-28	37	1	1	1	4	medecin	3	2	1		2	2	1	2	1	2	1	1	1	1	1	1	0	0	1	1	1	0	0	0	0	3	4	2	4	4	4	2	2	2	2	4	2	2	4	4	4	2	2
2021-05-24	41	1	1	1	4	medecin	10	7	2		2	2	2	2	2	2	1	1	1	1	1	1	0	0	1	1	0	1	0	0	0	4	4	4	4	4	4	4	4	4	2	2	2	2	4	4	4	2	2
2021-06-25	31	1	2	1	4	medecin	3	2	1		2	2	2	2	2	2	1	1	1	2	2	1	0	1	0	0	1	1	0	0	0	5	5	5	5	5	5	5	3	3	5	5	5	3	5	5	5	1	1
2021-06-30	35	1	1	1	4	infirmiere	2	2	1		2	2	2	2	2	2	1	1	1	1	1	1	0	0	1	0	1	1	0	0	0	4	4	4	4	4	4	4	2	2	4	2	2	2	4	4	4	2	2
2021-04-17	27	1	2	1	4	medecin	1	1	2		2	2	1	2	1	2	1	1	1	1	1	1	0	0	0	1	1	1	0	0	0	3	4	4	4	4	3	2	2	2	2	4	2	2	4	4	4	2	2
2021-06-30	32	2	2	1	4	infirmiere	7	2	2	2	2	2	2	2	2	1	2	1	1	2	1	1	0	0	1	0	0	0	1	0	1	2	2	3	4	3	4	2	4	2	2	2	2	2	4	4	2	2	2
2021-06-10	25	2	1	1	4	medecin	1	1	2	2	2	2	2	2	2	2	2	2	1	2	2	2	0	0	0	0	0	0	0	0	0	2	2	2	5	3	4	4	4	2	4	4	2	4	4	4	2	3	4
2021-06-28	30	1	2	1	4	medecin	2	2	2		2	2	1	2	2	2	1	1	1	1	1	2	0	0	0	0	0	0	0	0	0	4	2	4	4	4	4	4	4	2	4	2	2	2	4	4	2	2	2
2021-07-01	34	2	1	1	5	medecin	3	3	2	1	1	2	2	2	2	1	2	2	2	2	2	2	0	0	0	0	0	0	0	0	0	4	4	4	3	2	2	4	4	2	2	2	4	3	4	4	2	2	2
2021-05-27	36	1	1	1	4	medecin	4	2	2		2	2	1	2	2	2	1	1	1	1	2	1	0	0	1	1	1	0	0	0	0	2	4	4	4	4	4	4	4	4	4	4	2	2	4	4	4	2	2
2021-06-04	36	1	1	1	4	medecin	16	7	1		2	2	2	2	2	2	1	1	1	1	1	1	0	0	0	1	1	1	0	0	0	4	4	4	4	4	3	2	1	1	2	2	1	1	4	4	2	2	2
2021-04-08	62	1	1	1	4	medecin	8	4	2		1	1	2	2	2	2	1	1	1	1	1	2	0	0	0	0	0	0	0	0	0	2	4	4	4	4	4	3	4	2	3	4	2	2	4	4	4	2	2
2021-04-13	42	1	1	1	4	medecin	10	4	2		2	2	1	2	2	2	1	1	1	1	1	2	0	0	0	0	0	0	0	0	0	2	2	2	5	5	4	3	2	2	2	3	2	2	4	4	2	2	2
2021-06-28	32	1	1	1	4	medecin	3	2	2		2	2	2	2	2	2	1	1	1	1	1	1	0	0	1	1	0	1	0	0	0	5	5	5	5	4	4	3	2	2	2	4	2	2	5	4	2	1	1
2021-04-01	24	2	1	1	4	infirmiere	3	2	1	2	2	2	2	2	2	1	1	2	1	1	1	1	0	0	1	1	0	1	0	0	0	4	4	4	4	5	4	2	2	2	2	2	2	2	4	4	2	1	2
2021-04-19	32	2	2	1	4	ats	4	3	2	2	2	2	2	2	2	2	2	1	1	2	1	2	0	0	0	0	0	0	0	0	0	4	4	4	4	4	4	5	2	2	2	2	2	2	2	4	2	2	2
2021-06-30	35	2	1	1	4	medecin	5	3	2	2	2	2	1	2	2	1	1	1	2	2	2	2	0	0	0	0	0	0	0	0	0	2	2	4	4	4	4	4	4	2	4	2	2	2	4	4	4	2	2
2021-04-08	25	2	2	1	5	infirmiere	15	5	2	2	2	2	2	2	2	2	1	2	1	1	1	1	0	1	0	0	0	0	0	0	0	4	2	4	4	4	4	4	4	2	4	4	2	4	4	4	4	2	2
2021-04-27	36	2	1	1	5	infirmiere	10	2	2	2	2	1	2	2	1	2	1	2	1	2	2	1	0	0	1	0	0	0	0	0	0	2	4	3	4	4	3	2	4	3	4	4	2	2	4	4	2	2	2
2021-06-11	36	1	1	1	4	infirmiere	5	3	2		2	2	2	2	2	2	2	2	1	2	2	1	0	0	1	0	0	0	0	0	0	4	4	4	5	4	4	2	2	2	2	4	2	2	4	4	3	3	4
2021-06-22	43	2	1	1	5	medecin	7	4	2	2	2	2	2	2	2	2	1	1	1	1	2	1	0	0	1	0	0	0	0	0	0	3	2	2	4	2	4	4	4	2	4	4	2	3	4	4	2	2	2
2021-04-01	52	1	1	1	5	infirmiere	13	9	2		2	2	2	2	1	2	1	2	1	2	2	1	0	0	1	0	0	0	0	0	0	2	2	2	4	4	4	5	4	2	5	4	2	3	4	4	2	2	2
2021-05-24	21	2	1	1	5	infirmiere	15	10	2	2	2	2	2	2	1	2	2	2	2	2	2	1	0	0	1	0	0	0	0	0	0	2	2	3	4	4	4	5	4	2	4	4	1	2	4	4	2	2	1
2021-05-07	30	1	1	1	4	infirmiere	5	2	2		2	2	2	2	2	2	2	1	1	1	1	1	0	0	0	1	0	0	0	0	0	4	4	4	4	4	4	2	4	2	2	4	2	2	2	4	4	4	4
2021-05-05	23	2	2	1	5	infirmiere	6	3	2	2	2	2	2	1	2	2	2	2	2	2	2	1	0	0	0	1	0	0	0	0	0	2	4	4	4	4	4	4	4	2	2	2	2	2	4	4	4	2	2
2021-04-16	25	1	2	1	5	stagiaire	7	4	2		2	2	2	2	2	2	2	1	2	2	2	1	0	0	0	1	0	0	0	0	0	2	2	4	4	4	4	5	4	3	4	4	2	2	4	4	4	2	2
2021-05-06	25	1	2	1	5	infirmiere	2	2	2		2	2	2	2	2	2	1	1	1	1	2	1	0	0	0	0	1	0	0	0	0	4	4	4	4	4	4	4	4	2	4	2	2	2	4	4	2	2	2
2021-04-28	25	2	2	1	5	medecin	8	3	2	2	2	2	2	2	1	2	1	2	1	1	1	1	0	0	0	0	1	0	0	0	0	4	2	2	4	4	4	4	4	4	4	4	4	3	4	4	4	2	2
2021-06-17	22	1	2	1	5	stagiaire	6	5	2		2	2	2	2	2	2	1	1	1	1	1	1	0	0	0	0	1	0	0	0	0	2	2	2	4	4	4	2	2	3	3	4	3	3	4	4	2	3	2
2021-05-05	23	1	1	1	5	medecin	15	9	2		2	2	1	2	2	2	1	2	1	2	2	1	0	0	0	0	1	0	0	0	0	2	4	4	4	4	4	5	4	2	4	2	2	4	4	4	2	2	2
2021-04-08	30	1	1	1	4	infirmiere	4	2	2		2	2	2	2	2	2	1	1	1	1	1	1	1	1	0	0	1	0	0	0	0	2	2	2	4	5	5	4	4	2	2	4	2	2	5	4	2	2	4
2021-06-10	28	1	2	1	4	infirmiere	1	1	1		2	2	2	2	2	2	1	1	1	2	2	1	0	0	1	0	1	0	0	0	0	2	4	4	4	4	4	4	4	2	4	4	4	4	4	4	2	2	2
2021-04-20	35	1	1	1	4	medecin	5	2	2		2	2	1	2	2	2	1	1	1	1	2	1	0	0	1	0	1	0	0	0	0	4	4	4	3	4	4	2	4	2	4	4	2	4	4	4	4	2	2
2021-04-23	36	2	2	1	5	medecin	6	3	1	2	2	2	2	2	2	1	2	1	1	2	2	1	0	0	1	0	1	0	0	0	0	4	4	4	2	3	4	2	4	2	2	4	2	2	2	4	4	3	2
2021-04-20	23	2	2	1	5	stagiaire	6	3	2	2	2	2	2	2	1	2	2	1	1	1	2	1	0	0	1	0	1	0	0	0	0	2	4	4	4	4	4	5	4	2	4	4	2	2	2	4	2	2	2
2021-04-20	35	1	1	1	4	infirmiere	5	3	2		2	2	2	2	2	2	1	2	1	1	1	1	0	0	1	0	1	0	0	0	0	4	4	4	4	4	4	5	4	2	4	4	2	2	4	4	2	2	2
2021-04-20	24	1	2	1	4	infirmiere	5	4	2		2	2	2	2	2	2	2	2	2	2	2	1	0	0	1	0	1	0	0	0	0	4	4	4	4	4	4	2	2	2	2	2	2	2	4	4	2	3	3
2021-06-17	22	2	2	1	4	medecin	7	4	2	2	2	2	2	2	2	2	1	2	2	1	2	1	0	0	1	0	1	0	0	0	0	4	4	4	4	4	4	3	3	2	4	3	2	3	4	4	2	2	2
2021-04-20	23	2	2	1	5	medecin	8	6	2	2	2	2	2	2	2	2	2	1	1	2	2	1	0	0	1	0	1	0	0	0	0	2	2	2	4	4	4	5	4	2	2	4	2	2	4	4	4	3	3
2021-04-15	21	2	2	1	5	infirmiere	9	9	2	2	2	2	2	2	2	2	2	2	1	2	2	1	0	0	1	0	1	0	0	0	0	2	2	2	4	4	4	5	4	3	4	4	2	2	4	4	2	4	2
2021-04-20	34	1	1	1	4	medecin	25	20	2		2	2	2	2	2	2	1	1	1	2	2	1	0	0	1	0	1	0	0	0	0	4	4	4	4	5	4	4	4	2	2	4	2	2	4	5	2	3	2
2021-04-27	31	1	2	1	4	medecin	2	2	2		2	2	2	2	1	2	1	1	1	1	2	1	0	1	1	0	1	0	0	0	0	4	2	2	4	4	4	4	4	2	4	4	2	2	4	5	2	2	2
2021-05-20	39	2	1	1	5	infirmiere	10	3	2	2	2	2	1	2	2	2	1	1	1	2	2	1	0	1	1	0	1	0	0	0	0	4	4	4	4	4	4	4	4	2	4	2	2	2	4	4	2	2	2
2021-05-11	30	1	2	1	4	infirmiere	3	2	2		2	2	1	2	1	2	1	1	1	1	1	1	0	0	0	1	1	0	0	0	0	4	4	4	4	4	2	2	4	2	2	4	2	2	4	4	4	2	4
2021-06-09	26	1	1	1	4	infirmiere	2	2	2		2	2	2	2	1	1	1	1	1	1	2	1	0	1	0	1	1	0	0	0	0	4	4	4	4	4	4	5	4	4	5	4	4	4	2	2	2	4	4
2021-05-05	23	1	2	1	5	medecin	2	2	2		2	2	2	2	2	2	1	1	2	2	2	1	0	0	1	1	1	0	0	0	0	4	4	3	4	4	4	2	4	2	2	4	2	2	4	4	2	4	4
2021-05-18	35	2	1	1	5	medecin	7	2	2	2	2	2	2	2	2	2	1	1	1	1	1	1	0	0	1	1	1	0	0	0	0	2	4	2	4	4	4	4	4	2	4	2	2	2	4	4	4	2	2
2021-05-06	19	2	2	1	5	sagef	6	2	2	2	2	2	2	2	2	2	2	2	2	2	2	1	0	0	1	1	1	0	0	0	0	4	4	4	4	4	4	4	4	2	4	4	2	2	5	4	2	3	2
2021-03-31	36	1	1	1	4	infirmiere	4	2	2		2	2	2	1	1	2	1	1	1	1	1	1	0	0	1	1	1	0	0	0	0	4	2	2	4	4	4	3	2	4	2	4	2	2	4	4	4	2	2
2021-04-20	27	1	1	1	4	infirmiere	3	2	2		2	2	2	2	2	2	1	2	1	2	2	1	0	0	1	1	1	0	0	0	0	4	5	4	5	5	5	4	4	2	2	4	2	2	4	4	4	2	2
2021-03-30	37	2	1	1	5	medecin	6	2	2	2	2	2	2	2	2	2	1	1	1	1	2	1	0	0	1	1	1	0	0	0	0	3	4	3	5	4	4	4	4	3	3	4	2	2	4	4	4	2	2
2021-05-24	25	2	2	1	5	medecin	4	3	2	2	2	2	2	2	2	2	2	1	1	1	2	1	0	0	1	1	1	0	0	0	0	4	4	4	4	4	4	4	4	2	4	4	2	2	4	4	4	5	2
2021-03-30	37	1	1	1	5	infirmiere	9	4	2		2	2	2	2	2	2	2	1	1	2	2	1	0	0	1	1	1	0	0	0	0	4	4	4	4	2	4	4	4	2	2	4	3	2	4	4	2	2	2
2021-05-27	25	2	1	1	4	medecin	10	4	2	2	2	2	2	2	1	2	1	1	1	1	2	1	0	0	1	1	1	0	0	0	0	4	5	4	4	4	2	2	4	2	2	4	2	2	4	4	2	1	2
2021-05-31	26	2	2	1	4	infirmiere	10	5	1	2	2	2	2	2	2	1	1	1	1	1	2	1	0	0	1	1	1	0	0	0	0	3	2	4	2	4	2	2	2	2	2	2	1	2	4	5	4	1	2
2021-05-27	22	2	2	1	5	medecin	20	12	2	2	2	2	2	2	2	2	2	2	1	2	2	1	0	0	1	1	1	0	0	0	0	4	4	4	4	4	4	2	4	3	4	4	1	2	4	4	4	3	2
2021-04-22	27	1	2	1	4	medecin	7	5	2		2	2	2	2	2	2	1	1	1	1	2	1	0	0	0	1	0	1	0	0	0	2	2	2	4	4	4	2	4	2	2	4	2	2	4	4	4	3	4
2021-05-05	25	1	2	1	5	stagiaire	5	3	2		2	2	2	2	2	2	2	2	1	1	2	1	0	1	0	1	0	1	0	0	0	2	2	2	4	4	4	4	4	2	2	2	2	2	4	4	2	2	2
2021-04-28	31	1	2	1	4	medecin	25	10	2		2	2	2	2	2	2	1	1	1	1	1	1	0	0	1	1	0	1	0	0	0	4	4	4	4	4	4	2	3	2	4	2	2	2	5	3	4	2	2
2021-05-31	28	1	1	1	4	infirmiere	4	2	2		2	2	2	2	1	2	1	1	1	1	1	1	0	0	1	0	1	1	0	0	0	3	4	4	4	4	4	2	4	1	4	4	1	1	4	5	1	1	1
2021-06-01	27	2	2	1	4	infirmiere	7	4	2	2	2	2	2	2	2	1	1	1	2	2	2	1	0	0	1	0	1	1	0	0	0	4	4	4	4	4	4	2	4	4	4	4	4	4	4	4	4	2	2
2021-05-26	27	2	2	1	4	medecin	7	3	2	2	2	2	2	2	1	2	1	1	1	1	2	1	0	0	0	1	1	1	0	0	0	4	4	2	4	4	4	4	4	1	2	4	1	1	4	4	4	2	1
2021-05-27	25	2	2	1	5	medecin	16	14	2	2	2	2	2	2	2	2	2	2	1	1	1	1	0	1	0	0	0	0	1	0	0	4	2	5	4	2	4	4	4	1	5	4	4	4	2	4	2	4	2
2021-05-24	52	2	1	1	5	infirmiere	7	5	2	2	2	2	2	2	2	2	1	2	1	2	2	1	0	0	1	0	0	0	1	0	0	4	4	4	4	4	5	5	4	2	5	4	4	2	4	4	2	1	2
2021-06-01	29	1	2	1	4	medecin	2	2	2		2	2	2	2	2	2	1	1	1	1	1	1	0	1	0	1	0	0	1	0	0	4	5	4	2	4	5	2	2	2	2	2	1	1	4	4	1	2	1
2021-05-26	28	2	1	1	4	infirmiere	6	6	2	2	2	2	2	2	2	2	1	2	1	2	2	1	0	1	0	1	0	0	1	0	0	2	4	4	4	2	2	5	4	4	4	4	4	2	4	5	2	1	2
2021-05-24	22	2	2	1	5	medecin	13	5	2	2	2	2	2	2	2	2	1	1	1	2	2	1	0	0	1	1	0	0	1	0	0	4	4	4	5	4	4	5	4	4	4	4	2	2	4	4	4	1	1
2021-05-31	26	2	2	1	4	infirmiere	9	5	2	2	2	2	2	2	1	1	2	1	1	1	1	1	0	0	1	1	0	0	1	0	0	3	2	2	5	4	4	5	4	4	4	4	1	4	5	4	2	1	1
2021-05-11	23	1	2	1	5	infirmiere	11	7	1		2	2	2	2	1	2	1	1	1	1	1	1	0	0	1	1	0	0	1	0	0	4	2	2	4	4	4	2	2	2	2	2	2	2	5	5	2	4	2
2021-04-16	35	1	1	1	4	medecin	6	4	2		2	2	2	2	2	2	1	1	1	1	1	1	0	0	0	0	1	0	1	0	0	4	4	2	4	4	4	4	4	2	4	4	4	2	4	4	4	4	2
2021-05-21	32	2	1	1	5	medecin	6	2	1	2	2	2	1	2	2	2	1	2	1	2	2	1	0	0	1	0	1	0	1	0	0	2	4	4	4	4	4	5	4	2	4	2	2	2	4	5	2	4	2
2021-06-02	22	2	1	1	5	infirmiere	5	2	2	1	2	2	2	2	1	2	1	1	1	1	1	1	0	0	1	0	1	0	1	0	0	4	4	4	4	4	4	5	4	2	2	4	2	2	5	5	4	2	2
2021-04-06	30	2	1	1	4	infirmiere	2	2	2	1	2	2	1	2	1	2	1	1	1	2	2	1	0	0	1	0	1	0	1	0	0	2	2	2	4	4	4	2	2	2	2	2	2	2	4	4	2	2	2
2021-05-20	26	2	2	1	4	infirmiere	8	3	2	2	2	2	2	2	2	2	1	1	1	1	1	1	0	0	1	0	1	0	1	0	0	4	2	2	4	4	2	4	2	2	2	2	2	2	4	4	2	2	2
2021-03-31	20	1	2	1	5	infirmiere	9	8	2		2	2	2	2	2	2	2	1	2	1	2	1	0	0	1	0	1	0	1	0	0	4	4	4	4	2	4	4	4	3	4	4	4	2	4	4	4	4	2
2021-04-30	23	2	2	1	5	infirmiere	6	4	2	2	2	2	2	2	1	2	2	1	1	1	1	1	0	1	1	0	1	0	1	0	0	4	4	4	4	4	4	4	4	2	4	4	3	4	3	4	2	2	2
2021-05-24	23	2	1	1	5	infirmiere	4	2	2	2	2	2	1	2	1	2	1	1	1	2	2	1	0	0	0	1	1	0	1	0	0	2	2	2	4	4	4	5	4	2	5	4	4	4	4	4	2	4	4
2021-05-24	23	1	2	1	5	infirmiere	5	3	2		2	2	2	2	2	2	2	2	1	2	2	1	0	0	0	1	1	0	1	0	0	2	2	2	4	4	4	5	4	2	4	4	2	4	4	4	2	1	2
2021-05-24	21	2	2	1	5	infirmiere	6	4	2	2	2	2	2	2	2	2	1	1	1	2	2	1	0	0	0	1	1	0	1	0	0	2	2	2	4	4	4	4	4	4	4	4	2	4	4	4	2	3	1
2021-03-31	25	1	2	1	5	medecin	9	7	2		2	2	2	2	1	2	2	2	2	1	2	1	0	0	0	1	1	0	1	0	0	2	4	4	4	4	4	5	4	2	2	4	2	2	4	3	2	2	2
2021-05-24	23	2	2	1	5	medecin	12	10	2	2	2	2	2	2	2	2	1	1	1	2	2	1	0	0	0	1	1	0	1	0	0	2	2	2	4	4	4	5	4	2	4	4	2	2	4	4	4	3	2
2021-04-01	22	2	1	1	5	medecin	4	4	2	2	2	2	2	2	2	2	2	2	2	2	2	1	0	0	0	0	0	0	0	0	1	3	4	2	2	2	3	1	2	2	1	2	2	2	4	3	4	2	2
2021-04-30	31	1	2	1	4	medecin	2	2	2		2	2	2	2	2	2	1	1	1	1	1	1	0	0	1	0	0	0	0	0	1	4	4	4	4	4	4	5	2	2	2	4	2	2	4	4	2	2	2
2021-05-21	35	1	1	1	4	sagef	8	5	1		2	2	2	2	1	2	1	1	1	1	1	1	0	1	1	0	0	0	0	0	1	4	4	4	2	4	2	2	4	2	2	2	2	2	4	4	2	3	4
2021-06-02	33	1	1	1	4	medecin	3	2	2		2	2	2	2	2	2	1	1	2	1	1	1	0	1	0	1	0	0	0	0	1	4	4	4	4	5	4	2	2	2	2	2	2	2	4	4	4	1	2
2021-04-15	28	1	1	1	4	medecin	5	3	2		2	2	2	2	1	1	2	1	1	1	1	1	0	0	1	1	0	0	0	0	1	4	2	4	2	4	2	2	2	2	2	2	2	2	2	3	2	2	2
2021-04-27	22	2	2	1	5	medecin	10	3	2	2	2	2	1	2	1	2	2	2	1	2	2	1	0	0	0	0	1	0	0	0	1	4	2	4	4	3	4	2	2	2	2	2	2	2	4	4	2	2	2
2021-05-21	30	2	1	1	4	sagef	8	2	2	2	2	2	1	2	2	2	1	2	1	1	1	1	0	0	1	0	0	1	0	0	1	4	4	4	4	4	2	5	4	2	2	4	2	2	4	4	4	2	2
2021-05-24	30	1	2	1	4	stagiaire	7	5	2		2	2	2	2	2	2	1	1	1	1	2	1	0	0	1	0	0	1	0	0	1	4	5	4	5	4	4	4	5	1	2	4	2	1	4	5	2	2	1
2021-04-23	52	1	1	1	4	stagiaire	5	2	2		2	2	2	2	2	2	1	1	1	1	1	1	0	0	1	0	0	1	1	0	1	4	4	4	4	5	4	2	4	2	2	2	2	2	4	4	2	2	2
2021-04-02	22	2	1	1	5	infirmiere	1	1	1	2	2	2	2	2	2	2	2	2	2	2	2	2	0	0	0	0	0	0	0	0	0	2	2	2	4	4	4	4	4	2	2	4	2	2	4	4	4	2	2
2021-06-10	23	1	2	1	5	infirmiere	1	1	1		2	2	1	2	2	1	1	1	1	1	2	2	0	0	0	0	0	0	0	0	0	4	4	4	4	4	4	4	4	3	4	4	3	2	4	4	2	2	2
2021-03-31	29	2	1	1	3	infirmiere	3	1	1	2	2	2	2	2	2	2	1	1	1	1	1	2	0	0	0	0	0	0	0	0	0	2	2	2	2	2	2	4	4	2	4	4	3	2	4	4	2	2	2
2021-04-20	20	2	2	1	5	medecin	11	2	1	2	2	2	2	2	2	2	2	2	1	2	2	2	0	0	0	0	0	0	0	0	0	2	2	2	4	4	4	4	2	2	2	4	2	4	4	2	4	3	2
2021-05-12	30	2	1	1	5	medecin	4	2	2	2	2	2	2	2	2	2	1	1	1	2	2	2	0	0	0	0	0	0	0	0	0	4	2	4	5	5	4	5	2	2	4	4	2	2	4	4	2	2	2
2021-04-15	22	2	1	1	5	medecin	3	2	2	1	2	2	2	2	1	2	2	2	2	2	2	2	0	0	0	0	0	0	0	0	0	2	4	2	4	3	3	4	4	3	4	4	2	2	4	4	2	2	3
2021-04-03	30	2	1	1	4	sagef	5	2	2	2	2	2	2	2	2	2	1	1	1	1	2	2	0	0	0	0	0	0	0	0	0	2	2	2	4	4	4	3	2	2	3	4	4	4	4	4	4	2	2
2021-04-06	30	1	1	1	4	sagef	2	2	2		2	2	2	2	2	2	1	1	1	1	1	2	0	0	0	0	0	0	0	0	0	2	2	2	4	4	4	3	4	2	3	4	2	2	4	4	2	2	2
2021-05-18	29	2	1	1	4	medecin	4	2	1	2	2	2	2	1	2	2	1	1	1	1	1	2	0	0	0	0	0	0	0	0	0	4	4	4	4	5	5	4	4	2	3	4	2	2	4	4	2	2	2
2021-06-22	26	2	1	1	5	sagef	4	2	2	2	2	2	1	2	2	2	2	2	1	2	2	2	0	0	0	0	0	0	0	0	0	4	4	4	4	4	4	4	3	3	3	4	3	3	4	4	4	3	2
2021-04-02	22	2	1	1	5	pharma	4	2	2	2	2	2	1	2	2	2	1	1	2	2	2	2	0	0	0	0	0	0	0	0	0	4	4	4	4	4	4	5	2	2	4	2	4	2	4	4	2	2	2
2021-04-06	36	2	1	1	4	infirmiere	7	3	2	2	2	2	2	2	2	2	1	1	1	1	1	2	0	0	0	0	0	0	0	0	0	4	2	4	4	4	4	5	2	2	4	5	2	2	4	4	2	2	4
2021-05-18	29	2	1	1	5	stagiaire	4	3	2	2	2	2	1	2	2	2	1	1	1	1	1	2	0	0	0	0	0	0	0	0	0	4	4	2	4	4	4	5	4	2	2	2	2	2	4	4	2	2	1
2021-06-16	35	2	1	1	4	infirmiere	8	4	2	2	2	2	1	2	2	2	1	2	1	2	2	2	0	0	0	0	0	0	0	0	0	4	4	4	4	4	4	4	4	2	4	4	2	2	4	4	2	3	4
2021-05-05	24	2	2	1	5	infirmiere	5	5	2	2	2	2	2	2	1	2	2	2	2	2	2	2	0	0	0	0	0	0	0	0	0	2	2	2	4	4	4	4	4	2	5	4	4	2	4	4	2	2	2
2021-06-01	26	2	2	1	4	infirmiere	8	5	2	2	2	2	1	2	2	2	2	2	1	1	2	2	0	0	0	0	0	0	0	0	0	2	2	2	4	4	4	5	4	4	4	3	2	2	4	4	1	1	2
2021-04-28	28	2	2	1	5	medecin	7	7	2	2	2	2	2	2	2	1	2	2	1	2	2	2	0	0	0	0	0	0	0	0	0	2	4	2	4	4	4	5	4	2	4	4	4	2	4	4	4	2	4
2021-04-22	23	2	2	1	5	infirmiere	7	7	2	2	2	2	1	2	2	2	2	2	2	2	2	2	0	0	0	0	0	0	0	0	0	2	2	2	2	4	4	5	4	2	4	3	4	2	4	4	4	2	2
2021-06-07	24	2	2	1	5	infirmiere	8	7	2	2	2	2	2	2	2	2	1	1	1	2	2	2	0	0	0	0	0	0	0	0	0	4	4	4	5	4	4	4	2	2	4	3	2	2	5	4	2	1	2
2021-04-06	29	2	1	1	4	stagiaire	15	7	2	2	2	2	1	2	1	1	1	1	1	1	1	2	0	0	0	0	0	0	0	0	0	2	2	2	4	4	4	4	4	2	2	2	2	2	4	4	4	2	2
2021-04-23	28	2	2	1	5	infirmiere	10	8	2	2	2	2	2	2	2	2	2	2	2	2	2	2	0	0	0	0	0	0	0	0	0	4	2	4	4	3	4	4	4	2	4	4	2	2	4	4	2	3	4
2021-05-24	26	2	3	1	5	infirmiere	11	9	2	2	2	2	2	2	2	2	2	2	2	2	2	2	0	0	0	0	0	0	0	0	0	2	5	4	4	2	4	4	4	2	4	4	1	2	4	4	2	2	1
2021-06-24	26	1	2	1	4	medecin	15	9	2		2	2	2	2	2	2	1	1	2	1	2	2	0	0	0	0	0	0	0	0	0	2	2	2	4	4	4	4	3	2	2	3	2	2	4	4	4	2	2
2021-05-28	30	2	3	1	5	sagef	15	10	2	2	2	2	1	2	2	2	2	2	1	2	2	2	0	0	0	0	0	0	0	0	0	2	4	4	2	4	4	2	4	2	2	4	2	2	4	4	2	2	1
2021-06-08	25	2	1	1	5	medecin	15	10	2	1	2	2	2	2	2	1	2	2	1	1	2	2	0	0	0	0	0	0	0	0	0	4	2	4	5	4	4	5	4	2	4	4	2	4	4	4	2	1	2
2021-04-01	26	2	2	1	4	infirmiere	15	10	2	2	2	2	2	2	2	2	1	1	1	1	2	2	0	0	0	0	0	0	0	0	0	2	2	4	4	4	4	4	4	4	4	4	2	4	4	4	2	2	2
2021-04-14	23	2	1	1	5	infirmiere	20	12	2	2	2	2	2	2	2	2	1	1	1	1	1	2	0	0	0	0	0	0	0	0	0	2	2	2	4	4	2	4	4	2	2	2	2	2	4	4	2	2	2
2021-06-05	26	1	2	2	4	medecin	12	7	2		2	2	1	2	1	2	1	1	1	2	1	1	0	1	0	0	1	1	0	0	0	4	4	4	4	3	2	3	2	2	2	4	2	2	3	3	2	2	2
2021-04-19	25	1	2	2	5	medecin	3	2	2		2	2	2	2	2	2	2	2	2	2	2	2	0	0	0	0	0	0	0	0	0	4	4	2	4	4	4	4	4	4	4	4	2	2	4	4	4	2	2
2021-04-13	20	2	2	2	5	infirmiere	15	4	2	2	2	2	2	2	2	2	1	1	1	1	1	1	0	0	0	1	1	0	0	0	0	4	4	4	4	4	4	4	2	2	2	3	2	2	4	4	2	2	2
2021-04-19	36	1	1	2	4	medecin	2	2	2		2	2	1	2	2	2	1	1	1	1	2	1	0	1	1	0	0	1	0	0	0	2	4	4	4	4	4	5	4	4	4	4	2	2	4	4	4	2	2
2021-04-14	35	1	1	2	4	medecin	10	8	2		2	2	2	2	2	2	1	1	2	2	2	1	0	0	0	0	1	1	0	0	0	5	5	5	5	5	3	5	5	5	5	2	5	5	5	5	1	1	1
2021-04-21	29	1	2	2	5	pharma	5	5	2		2	2	2	1	2	2	1	1	1	2	1	1	0	0	1	0	1	1	0	0	0	4	4	4	4	4	4	4	4	3	2	4	2	2	4	4	4	2	4
2021-05-31	27	1	2	2	4	infirmiere	16	4	2		2	2	2	2	2	2	1	1	1	1	1	1	0	0	0	1	1	1	0	0	0	4	2	4	5	4	4	4	2	2	4	4	2	2	4	4	2	2	2
2021-05-28	55	1	1	2	4	infirmiere	3	2	2		2	2	1	2	1	1	1	1	1	1	1	1	0	1	0	0	1	0	1	0	0	4	2	4	4	4	4	4	4	4	4	4	4	4	4	4	4	2	2
2021-06-16	42	1	1	2	4	infirmiere	9	2	2		2	2	2	2	2	2	1	1	1	1	1	1	0	0	0	0	0	0	0	1	0	2	2	2	5	5	3	5	5	4	4	4	3	2	4	4	4	3	2
2021-04-19	21	1	2	2	5	infirmiere	1	1	2		2	2	2	2	2	2	2	2	1	1	2	2	0	0	0	0	0	0	0	0	0	2	2	2	4	4	4	4	4	2	4	4	2	2	4	4	2	2	2
2021-04-28	26	2	2	2	5	medecin	5	2	2	2	1	2	2	1	2	2	2	2	1	2	2	2	0	0	0	0	0	0	0	0	0	4	2	2	4	4	4	4	4	4	4	4	4	4	4	4	2	4	2
2021-04-21	26	2	1	2	5	sagef	3	2	2	1	2	2	2	2	2	2	2	2	1	2	2	2	0	0	0	0	0	0	0	0	0	2	4	4	4	4	4	4	4	3	2	2	2	4	4	4	4	2	4
2021-05-28	25	2	2	2	5	sagef	2	2	1	2	2	2	2	2	1	2	1	1	1	1	2	2	0	0	0	0	0	0	0	0	0	4	4	2	4	4	4	3	4	2	4	4	4	2	4	4	2	4	4
2021-05-26	45	1	1	2	4	infirmiere	6	2	2		2	2	2	2	2	2	1	1	1	1	1	2	0	0	0	0	0	0	0	0	0	2	2	2	5	5	5	5	5	1	1	4	2	2	2	2	2	2	2
2021-04-17	23	2	2	2	5	sagef	3	2	2	2	2	2	2	2	2	2	1	2	2	2	1	2	0	0	0	0	0	0	0	0	0	4	4	4	4	4	4	4	4	2	4	4	2	4	4	4	4	2	2
2021-05-20	21	2	2	2	5	medecin	5	3	2	2	2	2	2	1	2	2	1	2	2	2	1	2	0	0	0	0	0	0	0	0	0	1	2	2	4	3	4	5	4	4	4	5	4	2	4	5	4	2	2
2021-04-28	19	2	2	2	5	medecin	6	3	2	2	2	2	2	2	2	2	1	2	1	2	2	2	0	0	0	0	0	0	0	0	0	2	2	2	4	4	4	4	4	2	4	4	2	2	4	4	4	2	4
2021-04-17	19	2	2	2	5	infirmiere	6	3	2	2	2	2	2	2	2	1	2	2	2	2	2	2	0	0	0	0	0	0	0	0	0	4	4	4	4	4	4	4	2	4	4	4	4	4	4	4	2	2	2
2021-05-19	25	2	3	2	4	medecin	6	4	2	2	2	2	2	2	1	1	1	1	1	1	1	2	0	0	0	0	0	0	0	0	0	4	4	4	5	4	4	4	2	2	4	2	2	2	4	4	2	4	2
2021-04-14	20	2	2	2	3	medecin	8	6	2	2	2	2	2	2	2	2	2	2	2	2	2	2	0	0	0	0	0	0	0	0	0	4	4	3	4	4	5	5	2	2	4	4	2	2	4	4	4	1	2
2021-04-21	24	2	2	2	5	infirmiere	10	8	2	2	2	2	2	2	2	2	2	2	1	2	2	2	0	0	0	0	0	0	0	0	0	2	2	2	4	4	2	2	2	2	2	2	2	2	4	4	2	2	4
2021-03-26	29	1	2	2	4	medecin	15	8	2		2	2	1	2	2	2	2	2	2	1	2	2	0	0	0	0	0	0	0	0	0	3	3	4	4	4	4	4	5	5	5	4	3	2	5	5	2	4	2
2021-06-01	27	2	2	2	4	infirmiere	22	10	2	2	2	2	2	2	2	2	1	1	1	1	1	2	0	0	0	0	0	0	0	0	0	4	4	4	4	4	4	4	4	2	2	4	4	2	4	4	2	2	2
2021-06-05	22	2	2	2	5	infirmiere	20	11	2	2	2	2	1	2	2	2	1	1	2	2	2	2	0	0	0	0	0	0	0	0	0	4	4	4	5	5	4	2	2	2	3	4	2	2	4	4	2	2	2
2021-04-11	20	2	2	2	3	infirmiere	15	11	2	2	2	2	2	2	2	2	2	2	2	2	2	2	0	0	0	0	0	0	0	0	0	2	3	3	4	4	4	5	4	4	4	2	2	2	2	4	4	2	2
2021-05-05	29	2	2	2	5	infirmiere	11	5	2	2	2	2	2	2	2	2	1	1	1	1	2	1	1	0	1	0	0	0	0	1	0	4	4	4	4	4	4	4	4	4	4	4	4	4	4	4	4	2	2
2021-05-31	29	1	2	2	5	infirmiere	3	1	2		2	2	2	1	1	2	1	2	2	2	2	2	0	0	0	0	0	0	0	0	0	4	4	2	4	4	2	4	4	2	2	2	2	2	4	4	2	2	2
2021-06-05	23	2	2	2	5	infirmiere	2	2	1	2	2	2	1	2	2	2	1	1	1	1	1	2	0	0	0	0	0	0	0	0	0	4	4	4	4	4	4	2	2	2	2	2	2	2	2	2	2	2	2
2021-04-21	26	2	2	2	5	infirmiere	9	6	2	2	2	2	2	2	2	2	2	2	2	2	2	2	0	0	0	0	0	0	0	0	0	2	2	2	4	4	3	2	2	2	2	2	2	2	4	4	4	2	2
2021-06-22	34	2	1	2	5	infirmiere	15	8	2	2	2	2	2	2	2	1	1	1	1	1	2	1	0	0	0	0	0	1	0	0	0	4	2	2	4	4	4	4	4	2	4	4	2	2	4	4	2	2	4
2021-03-31	23	2	2	2	5	infirmiere	3	3	2	2	2	2	1	2	2	2	1	1	1	2	2	1	0	0	1	0	0	0	0	0	0	5	5	5	5	5	5	5	5	1	5	5	5	4	5	5	2	1	2
2021-04-01	20	2	1	2	5	infirmiere	10	3	2	1	2	2	1	2	2	2	1	1	1	2	2	1	1	0	1	0	0	0	0	0	0	5	3	5	5	5	5	5	5	1	5	5	1	1	5	5	2	2	1
2021-03-31	23	2	2	2	5	ats	3	3	2	2	2	2	2	2	2	2	1	1	1	1	2	1	0	1	0	1	0	0	0	0	0	4	4	4	5	5	3	5	5	1	5	4	1	2	5	5	5	1	1
2021-04-01	24	2	2	2	5	infirmiere	5	5	2	2	2	2	1	1	2	2	2	2	2	2	2	1	0	0	1	1	0	0	0	0	0	4	3	3	5	5	5	3	3	1	1	1	1	1	5	5	5	5	4
2021-04-01	19	2	2	2	5	infirmiere	9	4	2	2	2	2	2	2	2	2	1	1	2	2	2	1	1	1	1	1	0	0	0	0	0	5	5	5	5	5	5	5	5	5	5	5	3	5	5	3	3	2	5
2021-03-31	21	2	1	2	5	sagef	2	2	2	1	2	2	2	2	2	2	1	2	1	2	2	1	0	0	0	0	1	0	0	0	0	4	5	4	5	5	5	5	5	1	5	5	1	1	5	5	4	1	2
2021-03-31	22	2	1	2	5	medecin	4	2	2	2	2	2	1	2	2	1	2	1	2	2	2	1	0	0	0	0	1	0	0	0	0	4	4	5	5	5	5	5	5	1	5	4	5	5	5	2	4	1	1
2021-04-13	25	2	2	2	5	sagef	7	4	2	2	2	2	2	2	2	2	1	1	1	1	1	1	0	0	0	0	1	0	0	0	0	4	4	4	4	4	4	4	2	2	2	4	2	2	4	4	4	2	2
2021-03-31	24	2	2	2	5	medecin	11	7	2	2	2	2	1	2	2	2	1	1	1	2	2	1	0	0	0	0	1	0	0	0	0	4	4	3	5	5	5	5	2	2	5	3	4	1	3	5	4	4	2
2021-04-29	24	2	2	2	4	medecin	5	3	1	2	2	2	1	2	1	2	1	1	1	1	1	1	0	0	1	0	1	0	0	0	0	2	2	2	4	4	4	5	3	2	4	4	2	4	4	4	4	2	2
2021-03-31	22	2	2	2	5	medecin	15	9	2	2	2	2	2	2	2	2	1	2	2	1	1	1	0	1	1	0	1	0	0	0	0	1	4	1	5	2	4	5	5	5	5	3	5	5	5	5	4	1	4
2021-05-31	26	2	2	2	4	biologiste	3	3	2	2	2	2	2	2	2	2	1	1	1	1	1	1	1	0	0	1	0	1	0	0	0	4	4	4	4	4	4	4	4	4	4	4	4	4	4	4	4	2	2
2021-04-01	33	1	2	2	4	infirmiere	4	4	2		2	2	2	2	2	2	1	1	1	1	2	1	0	0	0	0	1	1	0	0	0	1	1	1	5	4	4	2	3	2	2	2	1	1	4	4	2	2	2
2021-03-26	24	2	2	2	4	infirmiere	11	7	2	2	2	2	2	2	1	2	1	1	1	1	1	1	1	0	0	0	1	1	0	0	0	1	2	2	5	4	4	2	2	2	1	2	1	1	2	4	5	1	4
2021-04-21	28	1	2	2	5	infirmiere	2	2	1		2	2	2	2	2	2	2	2	2	2	2	1	0	0	1	0	1	1	0	0	0	4	4	4	4	4	4	4	5	4	4	4	4	4	5	5	4	2	4
2021-04-01	25	2	2	2	5	infirmiere	16	8	2	2	2	2	2	2	2	2	2	2	1	2	2	1	0	0	0	0	0	0	1	0	0	5	5	3	5	5	5	5	5	2	5	4	5	3	5	5	4	1	2
2021-04-21	27	1	2	2	5	medecin	8	5	2		2	2	2	2	1	2	1	2	1	2	2	1	0	0	0	0	1	1	1	0	0	4	4	4	4	4	4	4	4	3	3	2	2	2	4	5	2	2	4
2021-06-05	21	1	2	2	5	medecin	9	6	2		2	2	2	2	2	2	1	1	1	1	1	1	0	0	0	0	1	1	1	0	0	4	4	4	4	4	4	4	4	4	4	4	4	4	4	4	4	4	4
2021-03-31	29	2	1	2	5	medecin	4	1	2	2	2	2	2	2	2	1	2	2	2	2	2	2	0	0	0	0	0	0	0	0	0	1	1	1	5	5	5	5	5	2	5	2	1	2	4	4	3	1	3
2021-04-08	34	1	2	2	4	sagef	1	1	2		2	2	2	2	2	2	1	1	1	1	1	2	0	0	0	0	0	0	0	0	0	2	2	2	4	2	4	2	4	2	2	4	2	2	4	4	4	2	2
2021-05-26	29	1	2	2	4	infirmiere	1	1	1		2	2	1	2	1	1	1	1	1	1	1	2	0	0	0	0	0	0	0	0	0	4	4	4	4	4	4	4	4	2	5	4	4	4	4	4	4	4	4
2021-04-14	32	1	2	2	4	infirmiere	1	1	1		2	2	2	2	2	2	1	1	1	1	1	2	0	0	0	0	0	0	0	0	0	4	2	4	5	5	4	2	2	2	2	3	2	2	4	4	4	2	2
2021-05-20	24	2	2	2	5	infirmiere	10	2	2	2	2	2	2	2	1	2	1	1	1	1	1	2	0	0	0	0	0	0	0	0	0	3	2	2	2	1	1	1	4	4	4	4	4	4	4	4	4	4	4
2021-05-05	30	2	1	2	5	infirmiere	3	2	2	1	2	2	1	2	2	2	1	2	1	2	2	2	0	0	0	0	0	0	0	0	0	4	4	4	4	4	4	4	4	4	4	4	4	4	4	4	4	2	5
2021-03-25	21	2	1	2	5	infirmiere	2	2	2	1	2	2	1	2	2	2	2	1	2	2	2	2	0	0	0	0	0	0	0	0	0	1	4	1	4	4	4	4	3	2	2	2	1	2	4	4	2	4	4
2021-04-01	24	2	1	2	5	sagef	6	2	2	2	2	2	2	2	2	1	1	2	2	2	2	2	0	0	0	0	0	0	0	0	0	1	2	2	5	5	3	5	1	1	5	5	5	4	5	5	5	1	1
2021-04-01	19	2	2	2	5	infirmiere	6	2	2	2	2	2	2	2	2	2	2	2	2	2	2	2	0	0	0	0	0	0	0	0	0	1	1	1	5	2	2	5	5	2	5	4	1	1	5	5	4	1	4
2021-05-19	20	2	2	2	5	infirmiere	5	2	2	2	2	2	2	2	2	2	1	1	1	2	1	2	0	0	0	0	0	0	0	0	0	2	2	2	2	4	4	4	2	2	2	2	2	2	4	4	4	2	2
2021-04-02	21	2	1	2	5	infirmiere	4	2	1	2	2	2	2	2	2	2	1	1	2	2	2	2	0	0	0	0	0	0	0	0	0	2	5	2	5	5	4	5	5	5	5	4	5	5	5	5	2	1	2
2021-05-24	24	2	2	2	5	infirmiere	6	3	2	2	2	2	1	2	1	2	1	1	1	2	2	2	0	0	0	0	0	0	0	0	0	2	2	2	2	2	2	4	4	2	2	4	2	2	5	5	2	2	2
2021-03-31	21	2	1	2	5	infirmiere	7	3	2	2	2	2	2	1	1	2	2	2	2	2	2	2	0	0	0	0	0	0	0	0	0	1	4	4	5	5	1	5	5	1	5	5	5	1	5	5	1	1	1
2021-04-01	22	2	2	2	5	infirmiere	7	3	2	2	2	2	2	2	1	2	2	1	2	2	2	2	0	0	0	0	0	0	0	0	0	1	1	1	5	1	5	5	1	3	5	3	1	3	3	5	1	1	1
2021-05-25	28	2	1	2	5	medecin	4	4	2	2	2	2	1	1	1	2	1	1	1	1	2	2	0	0	0	0	0	0	0	0	0	5	5	4	5	4	3	4	4	4	3	4	2	2	5	5	2	2	2
2021-05-18	28	1	2	2	5	infirmiere	7	5	2		2	2	2	2	2	2	1	2	1	1	1	2	0	0	0	0	0	0	0	0	0	4	4	4	4	4	4	4	3	3	2	2	2	2	4	4	2	2	2
2021-04-21	26	2	2	2	5	infirmiere	8	5	2	2	2	2	2	2	2	2	1	2	1	2	2	2	0	0	0	0	0	0	0	0	0	2	3	4	4	4	4	4	4	3	4	2	2	4	4	4	2	2	4
2021-05-31	28	1	2	2	4	infirmiere	18	5	1		2	2	2	2	1	2	1	1	1	1	1	2	0	0	0	0	0	0	0	0	0	4	2	4	4	4	2	4	4	4	4	4	4	4	2	4	4	2	2
2021-06-29	24	1	2	2	4	infirmiere	8	6	2		2	2	2	2	2	2	1	1	1	2	2	2	0	0	0	0	0	0	0	0	0	4	4	4	4	4	4	4	4	2	4	4	2	4	4	4	4	2	2
2021-05-19	24	2	2	2	5	infirmiere	11	6	2	2	2	2	1	2	1	2	1	2	1	1	1	2	0	0	0	0	0	0	0	0	0	4	2	4	4	4	4	4	4	2	4	4	4	2	4	4	2	2	2
2021-05-18	26	2	2	2	4	infirmiere	10	6	2	2	2	2	2	2	1	2	2	1	1	2	2	2	0	0	0	0	0	0	0	0	0	4	4	4	3	2	4	5	4	4	2	4	4	2	4	2	4	2	4
2021-03-31	20	2	2	2	5	infirmiere	8	7	2	2	2	2	2	2	2	2	2	2	2	2	2	2	0	0	0	0	0	0	0	0	0	1	4	4	5	4	4	5	4	1	4	4	5	4	5	5	4	1	2
2021-04-20	21	2	2	2	5	infirmiere	20	8	2	2	2	2	2	2	2	2	2	2	2	2	2	2	0	0	0	0	0	0	0	0	0	2	2	2	4	4	4	4	4	4	4	4	2	2	4	4	2	2	2
2021-03-24	26	2	1	2	5	sagef	6	2	2	2	2	2	2	2	2	2	2	2	1	2	2	1	0	0	1	1	0	0	0	0	0	1	2	2	5	4	4	3	4	4	1	1	1	1	4	4	2	4	2
2021-06-04	22	1	2	2	5	infirmiere	2	2	2		2	2	2	2	2	2	1	1	1	1	1	2	0	0	0	0	0	0	0	0	0	4	2	4	4	2	2	4	4	2	2	2	2	2	4	4	4	2	2
2021-04-07	38	2	1	2	5	infirmiere	6	4	2	2	2	2	2	2	2	2	2	2	2	2	2	1	1	0	0	0	0	0	0	0	0	5	4	4	5	1	5	5	4	4	3	3	3	3	5	5	1	4	4
2021-04-19	22	2	1	2	5	infirmiere	2	2	1	2	2	2	2	2	2	2	1	1	2	2	2	1	0	1	0	0	0	0	0	0	0	2	2	2	5	4	2	5	1	1	5	1	2	2	2	4	4	2	2
2021-04-02	24	2	2	2	5	infirmiere	10	4	2	2	2	2	2	2	2	2	2	2	2	1	2	1	0	1	0	0	0	0	0	0	0	1	2	2	5	5	4	5	4	2	4	4	5	3	5	4	4	1	4
2021-05-07	27	2	1	2	5	infirmiere	8	5	2	2	2	2	2	2	2	2	2	2	2	2	2	1	0	1	0	0	0	0	0	0	0	4	4	4	5	4	2	5	4	4	5	2	4	4	4	4	4	2	2
2021-04-21	22	2	2	2	5	infirmiere	5	2	2	2	2	2	2	2	2	2	2	2	1	2	2	1	0	0	1	0	0	0	0	0	0	2	4	2	5	5	5	4	5	5	4	4	4	1	5	5	4	2	2
2021-05-03	20	2	2	2	5	infirmiere	7	3	2	2	2	2	2	2	2	2	2	2	2	2	2	1	0	0	1	0	0	0	0	0	0	2	4	2	5	2	5	5	5	4	4	4	4	2	5	5	2	2	4
2021-05-11	21	2	2	2	5	infirmiere	9	4	2	2	2	2	2	2	2	2	2	1	2	2	2	1	0	0	1	0	0	0	0	0	0	2	2	2	5	5	4	5	4	4	4	4	4	2	5	5	4	2	2
2021-04-02	24	2	2	2	5	infirmiere	7	4	2	2	2	2	2	2	2	2	2	2	2	1	2	1	0	1	1	0	0	0	0	0	0	4	2	2	4	5	5	2	4	4	5	2	2	2	5	2	2	1	2
2021-04-07	20	2	2	2	5	sagef	7	5	1	2	2	2	2	2	2	2	1	2	2	1	1	1	0	1	1	0	0	0	0	0	0	4	2	4	4	4	5	5	5	5	5	4	5	4	5	5	4	1	2
2021-04-21	24	2	1	2	5	infirmiere	1	1	2	2	2	2	2	1	2	2	1	1	1	2	2	1	0	0	0	1	0	0	0	0	0	2	2	2	5	3	3	5	5	4	5	4	4	4	5	5	4	2	2
2021-05-06	25	2	1	2	5	sagef	4	2	2	2	2	2	2	2	2	2	2	2	1	2	2	1	0	0	0	1	0	0	0	0	0	2	4	2	4	4	4	2	4	2	2	2	4	2	4	4	2	2	2
2021-04-20	20	2	1	2	5	sagef	2	2	2	2	2	2	2	2	2	2	1	1	1	2	2	1	0	0	0	1	0	0	0	0	0	2	2	2	5	5	5	5	3	2	2	4	2	2	5	5	4	1	1
2021-04-26	21	2	2	2	5	infirmiere	3	3	2	2	2	2	2	2	2	2	1	1	2	2	2	1	0	0	0	1	0	0	0	0	0	2	2	2	5	2	4	3	2	1	2	4	4	1	5	5	4	2	2
2021-04-21	22	2	2	2	5	infirmiere	9	5	2	2	2	2	2	2	2	2	1	2	2	2	2	1	0	0	0	1	0	0	0	0	0	2	2	2	5	2	4	5	4	4	5	4	4	4	5	5	4	2	2
2021-04-22	24	2	1	2	5	ats	12	5	2	2	2	2	2	2	2	2	1	1	1	2	2	1	0	0	0	1	0	0	0	0	0	2	2	2	5	5	5	5	4	3	4	3	4	4	5	5	4	2	2
2021-05-07	22	2	1	2	5	infirmiere	15	8	2	2	2	2	2	2	2	2	1	1	1	1	1	1	0	0	0	1	0	0	0	0	0	2	2	2	4	2	2	4	4	4	4	4	4	4	5	5	2	2	4
2021-04-02	26	1	2	2	5	infirmiere	1	1	2		2	2	1	2	2	2	2	1	2	2	2	1	0	1	0	1	0	0	0	0	0	4	5	4	5	5	4	5	2	2	5	2	1	1	2	4	2	1	1
2021-05-03	26	2	1	2	5	sagef	10	2	2	2	2	2	2	2	2	1	1	1	1	2	2	1	0	1	0	1	0	0	0	0	0	2	2	2	5	5	5	5	4	4	4	4	2	1	5	5	3	2	4
2021-05-04	23	2	1	2	5	infirmiere	10	5	2	2	2	2	2	2	2	2	2	2	2	2	2	1	0	1	0	1	0	0	0	0	0	4	4	4	4	4	4	4	4	4	4	4	4	4	4	4	3	2	4
2021-04-22	20	2	2	2	5	infirmiere	8	6	2	2	2	2	2	2	2	2	2	1	1	2	2	1	0	1	0	1	0	0	0	0	0	4	4	2	5	2	2	5	4	2	5	4	4	2	5	5	2	2	4
2021-04-07	21	2	1	2	5	infirmiere	4	1	2	1	2	2	2	2	2	2	1	1	1	1	2	1	0	0	0	0	1	0	0	0	0	2	2	4	5	2	4	5	5	1	5	5	4	5	5	5	4	2	5
2021-03-31	23	1	2	2	5	infirmiere	8	2	2		2	2	2	2	2	1	1	1	2	2	2	1	0	0	0	0	1	0	0	0	0	5	4	2	3	5	2	5	5	1	5	1	1	1	5	5	5	1	1
2021-05-04	30	1	2	2	5	infirmiere	2	2	1		2	2	1	2	2	2	1	2	1	2	2	1	0	0	0	0	1	0	0	0	0	4	4	4	5	5	4	5	2	2	2	4	2	2	5	4	2	2	2
2021-04-02	26	2	2	2	5	infirmiere	3	2	2	2	2	2	1	2	2	2	1	1	1	1	2	1	0	0	0	0	1	0	0	0	0	3	2	2	5	5	5	1	1	1	2	1	1	2	5	5	1	1	1
2021-04-06	22	2	1	2	5	infirmiere	4	2	2	2	2	2	2	2	2	2	2	1	1	2	2	1	0	0	0	0	1	0	0	0	0	2	2	2	5	5	4	5	5	4	5	4	4	4	5	5	2	1	5
2021-04-06	19	2	2	2	5	infirmiere	5	2	2	2	2	2	2	2	2	2	2	2	2	2	2	1	0	0	0	0	1	0	0	0	0	2	2	3	2	4	4	5	3	1	5	4	2	4	5	5	2	1	1
2021-04-20	20	2	2	2	5	infirmiere	8	2	2	2	2	2	2	2	2	2	1	1	2	2	2	1	0	0	0	0	1	0	0	0	0	2	4	2	5	4	2	4	4	4	4	4	2	4	5	4	4	2	4
2021-04-22	23	2	1	2	5	infirmiere	4	2	2	2	2	2	2	2	2	2	1	1	1	1	1	1	0	0	0	0	1	0	0	0	0	2	2	2	5	5	5	5	2	4	4	4	4	2	5	5	4	2	2
2021-04-30	23	2	1	2	5	infirmiere	4	2	2	2	2	2	2	2	2	2	1	2	1	2	2	1	0	0	0	0	1	0	0	0	0	2	4	2	5	2	5	5	2	4	5	4	3	2	5	5	4	2	2
2021-05-06	20	2	2	2	5	infirmiere	5	2	2	2	2	2	2	2	2	2	2	2	1	1	2	1	0	0	0	0	1	0	0	0	0	3	4	3	4	4	4	1	2	2	2	4	2	2	4	5	4	2	2
2021-05-07	23	2	1	2	5	infirmiere	3	2	2	2	2	2	2	2	2	2	1	2	2	2	2	1	0	0	0	0	1	0	0	0	0	2	2	2	4	4	4	4	4	2	4	4	2	2	4	4	4	2	3
2021-05-11	23	2	1	2	5	infirmiere	5	2	1	2	2	2	2	2	2	2	2	1	1	2	2	1	0	0	0	0	1	0	0	0	0	2	2	4	4	2	2	2	4	4	4	4	4	4	4	4	4	2	4
2021-04-06	19	2	2	2	5	infirmiere	7	3	2	2	2	2	2	2	1	2	2	2	2	2	2	1	0	0	0	0	1	0	0	0	0	2	2	2	5	5	5	5	4	4	5	4	2	4	5	3	1	1	5
2021-04-06	25	2	1	2	5	ats	4	3	2	2	2	2	2	2	2	1	2	1	2	2	2	1	0	0	0	0	1	0	0	0	0	2	2	2	5	5	4	5	4	1	5	4	4	4	5	5	4	1	1
2021-04-26	25	2	1	2	5	infirmiere	6	3	2	2	2	2	2	2	2	2	2	1	2	2	2	1	0	0	0	0	1	0	0	0	0	4	2	4	5	4	5	5	5	4	4	4	4	4	5	5	2	2	2
2021-04-30	24	2	2	2	5	infirmiere	7	3	2	2	2	2	2	2	2	2	1	2	1	2	2	1	0	0	0	0	1	0	0	0	0	2	2	4	5	5	5	4	4	1	4	4	1	2	3	5	2	2	3
2021-05-18	22	2	1	2	5	infirmiere	4	4	1	2	2	2	2	2	1	2	2	1	2	2	2	1	0	0	0	0	1	0	0	0	0	2	2	2	5	4	4	5	2	2	2	4	4	2	4	4	4	2	2
2021-04-26	24	2	1	2	5	infirmiere	7	4	2	2	2	2	1	2	2	2	1	1	2	2	2	1	0	0	0	0	1	0	0	0	0	4	4	4	5	5	5	4	4	2	4	4	4	4	5	5	4	2	2
2021-05-17	24	2	2	2	5	infirmiere	9	5	2	2	2	2	2	2	1	1	2	1	2	2	2	1	0	0	0	0	1	0	0	0	0	2	2	2	5	4	2	4	4	4	3	4	4	4	3	3	2	1	2
2021-03-31	27	2	2	2	5	infirmiere	7	7	2	2	2	2	2	2	2	2	1	1	1	2	2	1	0	0	0	0	1	0	0	0	0	1	1	2	4	4	4	5	4	1	4	1	1	1	5	5	5	1	2
2021-05-07	26	2	1	2	5	infirmiere	10	7	2	2	2	2	2	2	1	1	2	2	1	1	1	1	0	0	0	0	1	0	0	0	0	4	4	4	4	4	2	2	2	2	2	4	1	2	4	4	2	2	2
2021-04-06	22	2	2	2	5	sagef	11	10	2	2	2	2	2	2	2	2	1	1	1	2	2	1	0	0	0	0	1	0	0	0	0	2	2	2	5	5	5	1	3	1	5	4	5	4	5	5	4	1	2
2021-05-06	20	2	2	2	5	infirmiere	5	2	2	2	2	2	2	2	2	2	2	2	1	2	2	1	0	1	0	0	1	0	0	0	0	2	2	2	4	5	5	5	4	4	4	4	4	4	2	2	4	2	4
2021-05-04	22	2	2	2	5	ats	12	4	2	2	2	2	2	2	2	1	2	2	1	2	2	1	0	1	0	0	1	0	0	0	0	2	4	2	5	5	5	5	4	4	5	4	4	4	3	3	2	2	2
2021-04-07	28	2	1	2	5	sagef	6	4	2	2	2	2	1	2	2	2	2	1	1	2	2	1	0	1	0	0	1	0	0	0	0	4	2	4	5	5	4	5	4	2	5	4	3	2	5	5	4	1	4
2021-04-22	21	1	2	2	5	infirmiere	12	7	2		2	2	2	2	2	2	1	2	1	2	2	1	0	1	0	0	1	0	0	0	0	2	4	4	5	5	5	5	4	1	5	2	4	2	5	5	4	2	2
2021-05-03	23	2	1	2	5	infirmiere	9	6	2	2	2	2	2	2	2	2	2	2	2	2	2	1	0	0	1	0	1	0	0	0	0	2	4	2	4	4	4	4	4	4	4	4	4	2	5	5	4	2	2
2021-07-14	34	2	1	2	5	infirmiere	3	2	2	2	2	2	1	2	2	2	2	1	1	1	1	1	1	0	1	0	1	0	0	0	0	1	2	2	4	4	4	4	2	4	4	4	2	4	4	4	2	2	4
2021-05-11	22	2	1	2	5	infirmiere	7	3	2	2	2	2	2	2	2	2	1	1	1	2	2	1	1	0	1	0	1	0	0	0	0	4	2	4	5	5	4	5	4	4	2	4	4	4	5	5	2	2	2
2021-04-07	24	2	1	2	5	infirmiere	2	2	2	2	2	2	1	2	2	2	2	2	2	1	1	1	0	1	1	0	1	0	0	0	0	2	2	2	5	5	4	5	4	2	5	4	5	4	5	5	2	1	1
2021-04-08	28	2	1	2	5	infirmiere	4	2	2	1	2	2	2	2	2	2	1	1	1	1	1	1	0	1	1	0	1	0	0	0	0	2	2	2	5	5	5	5	4	1	4	4	1	1	5	5	4	2	4
2021-05-07	23	2	1	2	5	sagef	4	3	2	2	2	2	2	2	2	2	1	1	1	2	2	1	0	1	1	0	1	0	0	0	0	2	2	4	5	4	4	4	2	2	2	2	4	2	5	3	2	2	4
2021-04-08	20	2	2	2	5	infirmiere	5	4	2	2	2	2	2	2	1	2	1	2	2	2	2	1	0	1	1	0	1	0	0	0	0	4	2	4	5	5	5	5	5	5	5	5	5	5	5	5	2	1	2
2021-04-08	21	2	1	2	4	sagef	6	5	2	2	2	2	2	2	1	2	1	2	1	2	2	1	0	1	1	0	1	0	0	0	0	3	5	2	5	5	5	5	5	1	5	5	5	1	3	5	3	4	5
2021-05-17	26	2	2	2	5	infirmiere	7	1	2	2	2	2	2	2	2	2	2	1	1	2	2	1	0	0	0	1	1	0	0	0	0	4	4	4	3	4	2	5	4	4	4	4	4	4	4	4	2	1	2
2021-04-21	19	2	1	2	5	infirmiere	3	2	2	2	2	2	2	2	2	2	2	2	1	2	2	1	0	0	0	1	1	0	0	0	0	2	2	2	2	2	2	2	4	1	2	2	1	2	3	4	2	2	2
2021-04-19	20	2	1	2	5	infirmiere	4	2	2	2	2	2	2	2	1	2	1	2	1	1	1	1	0	0	0	1	1	0	0	0	0	2	2	2	4	4	4	5	5	1	4	4	5	4	4	4	4	2	2
2021-04-19	21	2	1	2	5	infirmiere	5	4	1	2	2	2	1	2	2	2	1	1	2	2	2	1	0	0	0	1	1	0	0	0	0	2	4	2	5	2	4	5	4	4	5	5	4	2	5	5	4	2	2
2021-05-04	23	2	2	2	5	infirmiere	10	5	2	2	2	2	2	2	2	2	2	2	1	2	2	1	0	0	0	1	1	0	0	0	0	2	2	2	5	4	5	5	4	4	5	4	4	4	3	3	2	2	2
2021-05-17	27	2	1	2	5	infirmiere	3	1	2	2	2	2	2	1	1	2	2	2	1	2	2	1	0	1	0	1	1	0	0	0	0	4	4	4	5	2	4	5	3	2	2	2	4	2	2	4	2	2	2
2021-04-22	23	1	2	2	5	sagef	2	2	1		2	2	2	2	2	2	1	2	2	1	1	1	0	1	0	1	1	0	0	0	0	2	2	2	5	5	4	4	4	2	4	1	4	1	5	5	2	2	3
2021-04-06	22	2	1	2	5	medecin	4	2	2	1	2	2	1	2	2	2	2	2	2	2	2	1	0	1	0	1	1	0	0	0	0	2	4	4	5	5	5	5	4	1	5	4	1	1	5	4	4	1	1
2021-05-04	30	2	1	2	5	medecin	5	3	2	2	2	2	1	2	2	2	1	1	1	1	1	1	0	1	0	1	1	0	0	0	0	4	4	2	5	4	4	5	4	4	4	4	2	2	4	4	4	2	2
2021-04-19	21	2	1	2	5	sagef	4	2	2	2	2	2	2	2	2	2	2	2	1	1	1	1	0	0	0	0	0	1	0	0	0	4	2	2	4	5	4	4	4	1	4	4	1	1	4	4	4	2	2
2021-04-21	30	1	2	2	4	infirmiere	12	8	2		2	2	1	2	2	2	1	1	1	1	1	1	1	0	0	0	1	1	0	0	0	2	4	4	4	4	4	4	4	2	4	2	2	2	5	5	4	2	4
2021-05-05	34	2	1	2	4	infirmiere	5	2	2	2	2	2	2	2	1	2	1	1	1	1	1	1	0	0	1	0	1	1	0	0	0	4	4	4	4	4	4	4	4	4	4	4	2	4	4	4	2	2	4
2021-05-17	23	2	1	2	5	infirmiere	2	2	2	1	2	2	2	2	2	2	2	2	1	1	2	1	0	0	0	0	0	0	1	0	0	2	2	2	5	2	2	4	3	2	3	3	2	2	5	4	2	4	4
2021-05-11	20	2	2	2	5	infirmiere	5	3	2	2	2	2	2	2	1	2	1	1	1	1	1	1	0	0	0	0	0	0	1	0	0	2	2	2	5	5	4	2	2	2	2	2	1	2	5	5	4	2	2
2021-04-06	23	2	2	2	5	sagef	15	8	1	2	2	2	2	2	2	2	2	1	2	2	2	1	0	0	0	0	0	0	1	0	0	2	2	2	5	5	5	5	5	1	5	4	4	1	5	5	4	3	3
2021-05-11	20	2	2	2	5	infirmiere	11	8	2	2	2	2	2	2	1	2	1	2	1	2	2	1	0	0	0	0	0	0	1	0	0	2	2	2	4	4	2	5	4	4	4	4	5	4	4	4	2	2	2
2021-05-06	21	2	2	2	5	infirmiere	7	4	2	2	2	2	2	2	2	2	2	1	2	2	2	1	0	1	0	0	0	0	1	0	0	4	2	2	5	4	4	5	4	2	4	4	2	2	2	4	2	2	2
2021-05-17	26	2	2	2	5	infirmiere	9	4	2	2	2	2	2	2	1	2	2	2	2	1	2	1	0	1	1	0	0	0	1	0	0	2	2	2	5	2	4	4	4	2	4	4	4	2	5	5	4	2	2
2021-04-02	19	2	1	2	5	infirmiere	3	2	2	2	2	2	2	2	2	1	2	2	2	2	2	1	0	0	0	1	0	0	1	0	0	2	2	2	5	5	2	5	5	2	5	4	5	4	5	4	4	3	2
2021-04-21	20	2	2	2	5	sagef	10	6	2	2	2	2	2	2	2	2	1	2	1	1	2	1	0	0	0	1	0	0	1	0	0	2	4	2	5	5	4	5	5	2	3	4	1	1	5	5	4	2	2
2021-04-08	23	2	1	2	5	infirmiere	4	2	2	2	2	2	2	2	2	2	2	2	2	2	2	1	0	0	0	0	1	0	1	0	0	2	4	2	4	4	4	4	1	1	4	4	5	1	5	5	1	1	1
2021-04-22	21	2	2	2	5	sagef	10	7	1	2	2	2	2	2	2	2	2	1	1	2	2	1	0	0	0	0	1	0	1	0	0	2	4	2	5	4	4	5	4	1	5	5	1	2	3	5	2	2	2
2021-05-18	23	2	2	2	5	infirmiere	4	3	2	2	2	2	2	2	2	2	2	2	2	2	2	1	0	1	0	0	1	0	1	0	0	2	2	3	5	3	2	5	2	2	4	4	4	2	5	4	2	2	4
2021-05-05	19	2	2	2	5	infirmiere	5	3	2	2	2	2	2	2	2	2	1	1	2	2	2	1	0	0	0	1	1	0	1	0	0	2	2	2	4	2	4	4	4	2	4	4	4	2	4	4	4	2	2
2021-05-04	28	2	2	2	5	sagef	7	6	2	2	2	2	2	2	2	1	1	1	1	2	2	1	0	0	0	1	0	0	0	1	0	2	4	4	4	4	2	5	4	4	4	4	4	1	2	2	4	2	2
2021-06-04	28	1	1	2	5	sagef	3	2	2		2	2	2	2	2	2	1	1	1	1	1	1	1	0	1	1	0	0	0	1	0	4	4	2	4	4	4	2	4	2	2	4	2	2	4	4	2	2	4
2021-05-04	20	2	2	2	5	infirmiere	9	5	2	2	2	2	2	2	2	2	1	2	1	2	2	1	0	0	0	1	1	0	0	1	0	2	4	4	2	4	4	2	4	4	4	2	2	2	2	2	4	2	2
2021-04-21	22	2	2	2	5	infirmiere	9	3	2	2	2	2	2	2	2	2	2	2	2	2	2	1	0	0	0	1	0	0	1	1	0	4	4	4	5	5	5	4	5	1	5	4	4	4	5	5	4	2	2
2021-07-15	29	2	1	2	5	infirmiere	6	4	2	2	2	2	2	2	2	2	1	2	2	2	2	1	0	0	0	0	1	0	1	1	0	3	2	3	4	1	4	5	2	2	5	1	1	2	5	5	2	2	4
2021-06-28	32	2	2	2	5	infirmiere	8	5	2	2	2	2	1	1	1	2	1	1	2	1	1	1	0	0	0	0	1	0	1	1	0	4	2	2	5	5	5	5	4	4	4	4	3	3	5	5	1	1	1
2021-04-28	21	2	2	2	5	infirmiere	7	1	2	2	2	2	2	2	2	2	1	2	2	2	2	2	0	0	0	0	0	0	0	0	0	2	2	2	4	4	4	4	4	2	4	4	4	4	4	4	4	2	4
2021-04-01	29	2	1	2	5	infirmiere	3	1	2	2	2	2	1	2	2	2	2	2	2	2	2	2	0	0	0	0	0	0	0	0	0	3	3	3	5	3	5	5	3	1	5	4	1	1	3	5	4	1	2
2021-04-02	24	2	1	2	5	infirmiere	3	1	2	2	2	2	2	2	2	2	1	1	1	2	2	2	0	0	0	0	0	0	0	0	0	2	2	2	5	4	3	5	4	2	4	3	5	3	4	4	4	2	2
2021-04-08	21	2	1	2	4	infirmiere	1	1	2	2	2	2	2	2	2	2	2	2	2	2	2	2	0	0	0	0	0	0	0	0	0	2	2	4	5	5	5	5	5	1	5	5	5	1	5	4	4	4	2
2021-04-21	23	2	2	2	5	infirmiere	4	1	2	2	2	2	2	2	2	2	2	2	2	2	2	2	0	0	0	0	0	0	0	0	0	2	2	2	2	2	4	2	2	2	2	2	2	2	4	2	2	2	2
2021-04-22	21	2	2	2	5	sagef	5	1	1	2	2	2	2	2	2	2	2	2	2	2	2	2	0	0	0	0	0	0	0	0	0	2	2	2	5	5	4	5	2	2	5	4	2	1	5	5	2	2	2
2021-05-05	30	2	1	2	5	sagef	3	1	2	2	2	2	2	2	2	2	1	2	1	1	1	2	0	0	0	0	0	0	0	0	0	4	4	4	4	5	5	5	3	2	2	4	2	2	5	5	4	2	2
2021-05-07	27	2	1	2	5	sagef	7	1	2	2	2	2	2	2	2	2	1	2	1	2	2	2	0	0	0	0	0	0	0	0	0	2	2	2	4	4	4	4	4	4	4	3	2	2	4	4	4	2	2
2021-04-09	27	2	1	2	5	sagef	5	1	2	1	2	2	2	2	2	2	1	1	1	1	1	2	0	0	0	0	0	0	0	0	0	2	2	4	5	4	4	5	2	1	5	5	5	4	5	4	4	4	2
2021-04-19	20	2	2	2	5	ats	7	1	1	2	2	2	1	2	2	2	2	2	2	2	2	2	0	0	0	0	0	0	0	0	0	4	4	2	4	4	4	4	4	1	5	4	4	1	5	5	1	1	1
2021-04-26	21	2	2	2	5	ats	6	1	2	2	2	2	2	2	2	2	2	2	2	2	2	2	0	0	0	0	0	0	0	0	0	1	1	3	5	2	4	5	1	1	5	4	1	2	4	4	2	2	1
2021-05-17	24	2	2	2	5	infirmiere	5	1	2	2	2	2	2	2	1	2	2	1	1	2	2	2	0	0	0	0	0	0	0	0	0	2	4	4	4	4	4	5	4	4	4	4	4	2	4	5	4	2	2
2021-05-03	21	2	1	2	5	infirmiere	4	2	2	2	2	2	1	2	2	2	2	2	2	2	2	2	0	0	0	0	0	0	0	0	0	2	4	4	5	5	4	5	4	2	5	4	4	2	5	5	4	2	2
2021-04-01	28	2	3	2	5	infirmiere	5	2	2	2	2	2	2	2	2	1	2	1	2	2	2	2	0	0	0	0	0	0	0	0	0	1	4	5	2	5	2	2	2	2	1	4	1	1	5	5	4	4	5
2021-04-30	22	2	2	2	5	infirmiere	7	2	2	2	2	2	2	2	1	2	1	2	2	2	2	2	0	0	0	0	0	0	0	0	0	4	4	4	2	3	4	3	2	2	3	4	2	2	3	2	4	2	4
2021-05-18	27	2	1	2	5	infirmiere	3	2	1	1	2	2	2	2	2	2	1	2	1	2	2	2	0	0	0	0	0	0	0	0	0	4	4	4	4	4	4	4	4	4	4	4	4	4	4	4	4	2	4
2021-03-30	24	2	1	2	5	infirmiere	5	2	2	2	2	2	1	2	2	2	1	2	2	2	2	2	0	0	0	0	0	0	0	0	0	1	1	1	5	5	2	5	5	1	5	5	3	3	5	5	1	1	1
2021-03-31	22	2	1	2	5	infirmiere	5	2	2	2	2	2	1	2	2	2	2	2	1	2	2	2	0	0	0	0	0	0	0	0	0	2	5	2	5	2	4	5	2	1	5	4	1	1	5	5	1	1	2
2021-04-02	22	2	3	2	5	infirmiere	20	2	2	2	2	2	2	2	2	2	2	2	2	2	2	2	0	0	0	0	0	0	0	0	0	3	5	1	5	2	3	5	2	1	5	4	5	4	5	3	4	4	4
2021-04-06	28	2	1	2	5	infirmiere	2	2	1	2	2	2	2	2	2	2	2	1	1	1	2	2	0	0	0	0	0	0	0	0	0	4	5	4	5	2	4	2	2	1	2	4	1	1	2	2	4	1	2
2021-04-06	29	2	1	2	5	infirmiere	2	2	2	2	2	2	1	2	2	2	1	1	2	2	2	2	0	0	0	0	0	0	0	0	0	4	5	4	5	2	3	5	3	2	5	3	3	2	2	2	4	1	2
2021-04-07	29	2	1	2	5	infirmiere	4	2	2	1	2	2	2	2	2	2	1	1	1	1	2	2	0	0	0	0	0	0	0	0	0	2	2	2	5	2	4	5	4	4	5	5	4	4	5	4	2	2	2
2021-04-07	20	2	1	2	5	infirmiere	5	2	2	2	2	2	2	2	2	2	2	2	2	2	2	2	0	0	0	0	0	0	0	0	0	2	2	2	5	5	5	5	2	2	5	2	4	2	5	5	4	1	1
2021-04-08	24	2	1	2	5	infirmiere	2	2	1	2	2	2	2	2	2	2	1	2	2	2	2	2	0	0	0	0	0	0	0	0	0	2	2	2	5	3	2	5	5	2	5	4	4	2	2	4	2	1	4
2021-04-08	22	2	2	2	5	infirmiere	2	2	1	2	2	2	2	2	1	1	2	1	2	1	2	2	0	0	0	0	0	0	0	0	0	1	4	2	4	4	5	2	4	1	2	3	1	1	5	5	1	1	4
2021-04-09	22	2	2	2	5	infirmiere	3	2	2	2	2	2	2	2	1	2	1	2	2	2	2	2	0	0	0	0	0	0	0	0	0	2	2	2	4	2	4	2	4	1	2	5	5	1	4	2	4	1	5
2021-04-09	22	2	2	2	5	infirmiere	2	2	2	2	2	2	2	2	2	2	2	2	2	2	2	2	0	0	0	0	0	0	0	0	0	2	2	2	3	5	2	5	2	2	2	2	1	2	3	3	4	3	3
2021-04-09	24	2	1	2	5	infirmiere	3	2	2	1	2	2	2	2	2	2	2	2	2	2	2	2	0	0	0	0	0	0	0	0	0	3	4	3	5	4	4	5	3	1	5	3	2	1	3	4	2	3	2
2021-04-09	23	2	1	2	5	infirmiere	3	2	2	2	2	2	2	2	1	2	2	1	2	2	2	2	0	0	0	0	0	0	0	0	0	4	4	5	5	3	4	5	5	1	5	5	1	1	2	4	4	4	2
2021-04-19	21	2	1	2	5	infirmiere	4	2	2	2	2	2	2	2	2	2	2	2	2	2	2	2	0	0	0	0	0	0	0	0	0	2	4	4	4	5	4	5	4	4	5	4	4	2	4	5	4	1	2
2021-04-20	21	2	1	2	5	infirmiere	2	2	2	1	2	2	2	2	2	2	2	2	2	2	2	2	0	0	0	0	0	0	0	0	0	2	4	2	5	2	2	5	5	2	5	4	4	2	2	4	4	2	2
2021-04-20	18	2	1	2	5	infirmiere	4	2	2	2	2	2	2	2	2	2	2	2	2	2	2	2	0	0	0	0	0	0	0	0	0	2	4	2	5	2	2	5	2	1	5	4	4	2	3	5	4	1	2
2021-04-21	27	2	1	2	5	infirmiere	5	2	2	2	2	2	2	2	2	2	2	2	2	2	2	2	0	0	0	0	0	0	0	0	0	2	2	2	5	2	4	3	2	1	2	1	1	2	2	5	2	2	3
2021-04-22	24	2	1	2	5	infirmiere	5	2	2	2	2	2	2	2	2	2	1	2	2	2	2	2	0	0	0	0	0	0	0	0	0	2	2	2	5	5	2	5	2	2	2	3	1	1	5	4	4	2	2
2021-04-26	22	2	1	2	5	infirmiere	2	2	2	1	2	2	2	2	2	2	2	2	2	2	2	2	0	0	0	0	0	0	0	0	0	2	2	2	5	2	2	4	4	2	4	4	4	1	4	4	4	2	4
2021-04-30	24	2	2	2	5	infirmiere	6	2	2	2	2	2	2	2	2	1	1	1	1	1	1	2	0	0	0	0	0	0	0	0	0	2	4	2	5	5	5	5	2	1	4	4	4	4	5	5	1	2	2
2021-04-30	24	2	2	2	5	infirmiere	10	2	2	2	2	2	2	2	2	1	1	1	1	1	1	2	0	0	0	0	0	0	0	0	0	2	4	2	5	4	4	2	2	2	4	4	2	1	5	4	2	2	2
2021-04-30	20	2	1	2	5	infirmiere	2	2	2	2	2	2	2	2	2	2	1	1	1	2	2	2	0	0	0	0	0	0	0	0	0	3	2	4	5	3	2	2	2	2	2	2	2	1	5	5	4	2	2
2021-04-30	25	2	1	2	5	infirmiere	6	2	2	2	2	1	2	2	1	2	2	2	2	2	2	2	0	0	0	0	0	0	0	0	0	2	2	2	5	2	2	5	4	2	4	4	4	2	2	4	2	2	2
2021-04-30	26	2	1	2	5	infirmiere	5	2	1	2	2	2	1	2	1	2	2	1	2	2	2	2	0	0	0	0	0	0	0	0	0	1	2	1	3	2	3	3	4	1	4	4	4	1	3	4	2	2	2
2021-04-30	28	2	1	2	5	infirmiere	8	2	2	2	2	2	1	2	2	2	2	2	2	2	2	2	0	0	0	0	0	0	0	0	0	2	2	2	3	2	4	2	2	2	2	2	2	2	2	2	2	1	2
2021-04-30	22	2	1	2	5	infirmiere	2	2	2	2	2	2	2	1	2	2	2	2	1	2	2	2	0	0	0	0	0	0	0	0	0	2	2	2	4	2	4	5	2	2	3	4	4	2	4	4	2	2	4
2021-05-04	22	2	1	2	5	infirmiere	2	2	1	2	2	2	2	2	2	2	2	2	2	2	2	2	0	0	0	0	0	0	0	0	0	2	2	2	5	4	4	3	2	2	3	2	2	1	5	3	2	2	3
2021-05-07	26	2	1	2	5	infirmiere	4	2	2	2	2	2	2	2	2	2	2	1	2	2	2	2	0	0	0	0	0	0	0	0	0	2	2	4	4	4	2	5	4	2	4	4	2	2	4	4	2	2	2
2021-05-07	28	2	1	2	5	medecin	8	2	2	2	2	2	2	2	2	2	2	1	1	2	2	2	0	0	0	0	0	0	0	0	0	2	2	2	4	4	4	5	4	2	4	4	1	2	4	4	4	2	4
2021-05-17	25	2	1	2	5	sagef	6	2	2	2	2	2	2	1	2	1	1	1	1	2	2	2	0	0	0	0	0	0	0	0	0	2	2	2	5	4	4	5	4	2	4	4	2	2	2	4	4	2	4
2021-07-08	28	2	1	2	5	sagef	3	2	2	2	2	2	2	2	2	2	2	2	2	2	2	2	0	0	0	0	0	0	0	0	0	1	4	1	5	4	2	4	5	2	2	2	2	5	3	3	4	2	2
2021-05-21	35	2	1	2	4	sagef	8	2	1	2	2	2	2	2	2	2	1	1	1	1	2	2	0	0	0	0	0	0	0	0	0	2	2	2	4	4	4	4	4	4	4	4	4	4	4	4	4	4	4
2021-03-30	24	2	3	2	5	sagef	4	2	2	2	2	2	2	2	2	2	2	2	2	2	2	2	0	0	0	0	0	0	0	0	0	1	1	1	5	5	3	5	3	1	5	1	3	1	5	5	1	2	1
2021-03-30	25	2	1	2	5	sagef	5	2	2	2	2	2	1	2	2	2	2	1	2	2	2	2	0	0	0	0	0	0	0	0	0	1	1	1	3	5	1	3	5	1	3	3	1	1	5	5	4	1	5
2021-03-30	24	2	1	2	5	sagef	4	2	1	2	2	2	2	2	2	2	2	2	1	2	2	2	0	0	0	0	0	0	0	0	0	1	3	1	5	5	5	5	5	1	5	4	4	5	5	5	4	1	2
2021-04-01	28	2	1	2	5	sagef	7	2	2	2	2	2	2	2	2	2	1	1	1	2	2	2	0	0	0	0	0	0	0	0	0	1	5	4	5	5	4	5	5	1	5	5	5	1	5	5	4	3	2
2021-04-01	19	2	2	2	5	sagef	5	2	2	2	2	2	2	2	2	2	2	2	2	2	2	2	0	0	0	0	0	0	0	0	0	1	2	5	5	5	2	5	5	3	5	5	5	2	5	4	2	4	2
2021-04-06	25	2	1	2	5	sagef	4	2	2	2	2	2	2	2	2	2	2	2	2	2	2	2	0	0	0	0	0	0	0	0	0	2	2	2	5	4	4	5	2	2	5	4	4	1	5	5	4	2	4
2021-04-19	22	2	1	2	5	sagef	3	2	1	2	2	2	1	2	1	2	2	1	1	2	2	2	0	0	0	0	0	0	0	0	0	2	2	2	5	4	4	4	4	1	2	4	4	4	4	4	1	2	4
2021-04-20	24	2	1	2	5	sagef	2	2	1	2	2	2	2	2	2	2	2	2	2	2	2	2	0	0	0	0	0	0	0	0	0	4	4	4	4	5	4	5	4	4	5	4	4	4	5	5	4	2	4
2021-04-20	20	2	1	2	5	sagef	2	2	2	1	2	2	2	2	2	2	2	2	2	2	2	2	0	0	0	0	0	0	0	0	0	2	2	2	5	5	2	5	4	2	3	1	4	1	4	5	4	1	1
2021-04-21	23	2	1	2	5	sagef	4	2	2	1	2	2	2	2	2	2	2	2	2	2	2	2	0	0	0	0	0	0	0	0	0	2	2	2	5	5	4	5	4	4	2	4	4	2	5	5	2	2	2
2021-04-21	24	2	1	2	5	sagef	5	2	2	2	2	2	2	2	2	2	2	1	1	1	1	2	0	0	0	0	0	0	0	0	0	2	2	2	5	2	3	3	5	5	5	4	3	4	5	5	4	2	4
2021-04-22	23	2	1	2	5	ats	2	2	2	1	2	2	2	2	2	2	2	2	2	2	2	2	0	0	0	0	0	0	0	0	0	2	2	2	5	2	4	5	1	4	5	4	2	2	5	4	4	2	2
2021-05-07	29	2	1	2	5	infirmiere	6	2	2	2	2	2	2	2	2	2	2	2	2	2	2	2	0	0	0	0	0	0	0	0	0	4	4	4	4	2	4	5	4	4	4	4	4	4	5	5	4	2	2
2021-05-17	31	2	1	2	5	infirmiere	4	2	1	2	2	2	2	2	2	2	2	2	2	2	2	2	0	0	0	0	0	0	0	0	0	4	4	4	4	4	4	4	4	2	5	4	2	2	4	4	4	2	4
2021-05-04	19	2	2	2	5	infirmiere	5	3	2	2	2	2	2	2	2	2	2	2	2	2	2	2	0	0	0	0	0	0	0	0	0	2	2	2	5	2	5	5	4	2	2	4	3	1	5	3	4	2	2
2021-04-06	23	1	2	2	5	infirmiere	4	3	2		2	2	2	2	2	2	2	1	2	1	2	2	0	0	0	0	0	0	0	0	0	3	4	4	5	5	5	5	4	1	3	5	4	1	2	3	2	1	2
2021-04-06	20	1	2	2	5	infirmiere	3	3	2		2	2	2	2	2	2	1	1	2	2	2	2	0	0	0	0	0	0	0	0	0	2	2	2	5	4	5	5	4	4	5	4	4	4	5	5	1	4	1
2021-04-07	22	1	2	2	5	infirmiere	6	3	1		2	2	2	2	1	2	2	1	2	2	2	2	0	0	0	0	0	0	0	0	0	2	2	4	5	5	5	5	3	1	5	4	1	2	5	5	2	1	1
2021-04-09	25	1	2	2	5	infirmiere	3	3	2		2	2	2	2	1	2	1	2	1	1	1	2	0	0	0	0	0	0	0	0	0	2	2	4	4	2	5	5	4	2	2	4	4	4	2	5	2	1	2
2021-04-02	25	2	1	2	5	infirmiere	5	3	2	2	2	2	2	2	2	2	2	2	2	2	2	2	0	0	0	0	0	0	0	0	0	2	5	4	5	5	5	5	5	4	5	4	5	4	5	5	4	4	4
2021-04-06	21	2	2	2	5	infirmiere	5	3	2	2	2	2	2	2	1	2	2	2	2	2	2	2	0	0	0	0	0	0	0	0	0	2	4	4	4	4	4	5	4	1	5	4	1	1	5	4	4	2	4
2021-04-06	22	2	1	2	5	infirmiere	3	3	1	1	2	2	2	2	2	2	1	2	2	2	2	2	0	0	0	0	0	0	0	0	0	2	2	2	5	2	2	2	4	2	2	2	2	2	2	2	2	2	2
2021-04-07	22	2	2	2	5	infirmiere	6	3	2	2	2	2	2	2	2	2	2	2	2	1	1	2	0	0	0	0	0	0	0	0	0	4	4	4	2	4	2	4	2	1	1	4	1	2	3	5	2	1	2
2021-04-20	20	2	2	2	5	infirmiere	8	3	2	2	2	2	2	2	2	2	2	2	2	2	2	2	0	0	0	0	0	0	0	0	0	2	4	2	3	2	3	5	4	1	4	4	4	2	3	3	4	1	2
2021-04-21	22	2	2	2	5	infirmiere	5	3	2	2	2	2	2	2	2	2	2	2	2	2	2	2	0	0	0	0	0	0	0	0	0	2	2	2	2	2	4	5	4	2	5	4	2	2	5	5	4	2	2
2021-04-22	22	2	2	2	5	infirmiere	5	3	1	2	2	2	2	2	2	2	1	2	1	2	2	2	0	0	0	0	0	0	0	0	0	4	4	2	5	5	2	5	5	1	5	4	4	1	5	5	2	2	2
2021-04-30	23	2	2	2	5	infirmiere	10	3	2	2	2	2	2	2	1	1	1	1	2	1	1	2	0	0	0	0	0	0	0	0	0	2	4	4	5	2	4	2	2	4	4	4	4	4	5	5	4	2	2
2021-04-30	20	2	2	2	5	infirmiere	3	3	2	2	1	1	2	2	2	2	2	2	1	2	2	2	0	0	0	0	0	0	0	0	0	2	4	4	2	2	2	5	3	2	4	2	2	2	5	4	4	2	2
2021-05-04	23	2	2	2	5	infirmiere	12	3	2	2	2	2	2	2	2	2	2	2	2	2	2	2	0	0	0	0	0	0	0	0	0	2	2	2	4	3	3	3	3	2	4	3	4	2	3	3	3	2	3
2021-05-05	25	2	2	2	5	infirmiere	4	3	2	2	2	2	2	2	2	2	1	1	2	2	2	2	0	0	0	0	0	0	0	0	0	2	2	2	4	2	4	5	4	2	4	4	2	2	4	4	2	2	4
2021-05-06	23	2	2	2	5	infirmiere	5	3	2	2	2	2	2	2	1	1	2	1	1	1	2	2	0	0	0	0	0	0	0	0	0	2	4	3	5	4	4	4	5	2	2	4	2	2	4	4	4	2	2
2021-05-07	20	2	2	2	5	labotech	7	3	2	2	2	2	2	2	2	2	2	2	2	2	2	2	0	0	0	0	0	0	0	0	0	2	4	2	5	1	4	5	4	2	5	4	4	2	4	5	2	2	2
2021-05-07	25	2	1	2	5	sagef	3	3	2	2	2	2	2	2	2	2	2	2	2	2	2	2	0	0	0	0	0	0	0	0	0	4	4	4	5	2	2	5	4	1	5	4	4	1	4	4	4	2	2
2021-05-11	22	2	1	2	5	ats	4	3	2	2	2	2	2	2	2	2	2	2	2	2	2	2	0	0	0	0	0	0	0	0	0	4	4	4	4	4	4	4	4	2	2	4	1	1	4	4	4	2	4
2021-03-31	27	1	2	2	5	biologiste	7	3	2		2	2	2	2	1	2	1	1	1	1	1	2	0	0	0	0	0	0	0	0	0	4	4	4	5	5	5	1	5	2	1	5	1	1	3	5	4	1	2
2021-04-26	19	2	2	2	5	biologiste	8	3	2	2	2	2	2	2	2	2	2	2	2	2	2	2	0	0	0	0	0	0	0	0	0	2	2	1	5	4	5	5	4	4	4	4	4	4	5	5	4	2	2
2021-05-03	23	2	2	2	5	infirmiere	8	4	2	2	2	2	2	2	2	2	1	2	2	2	2	2	0	0	0	0	0	0	0	0	0	2	2	2	4	4	4	5	4	4	4	4	4	2	5	5	2	2	1
2021-05-07	24	2	2	2	4	infirmiere	4	4	2	2	2	2	2	2	2	2	2	2	2	2	2	2	0	0	0	0	0	0	0	0	0	2	2	2	2	4	2	2	2	2	2	2	2	2	2	4	2	2	2
2021-05-11	23	1	2	2	4	infirmiere	4	4	2		2	2	2	2	2	2	2	1	2	1	2	2	0	0	0	0	0	0	0	0	0	2	2	1	4	4	4	2	2	1	1	2	1	1	3	3	2	2	2
2021-04-20	21	1	2	2	5	infirmiere	7	4	2		2	2	2	2	2	2	2	2	1	2	2	2	0	0	0	0	0	0	0	0	0	2	2	2	5	2	2	5	4	2	5	4	2	2	3	5	4	2	2
2021-05-03	20	1	2	2	5	infirmiere	5	4	2		2	2	2	2	1	2	2	2	2	2	2	2	0	0	0	0	0	0	0	0	0	2	2	2	3	5	2	5	4	2	4	4	4	4	5	3	4	2	2
2021-04-06	24	1	2	2	5	infirmiere	5	4	1		2	2	2	2	1	2	1	2	2	2	2	2	0	0	0	0	0	0	0	0	0	2	2	3	5	2	2	2	3	1	2	3	2	2	5	2	2	1	1
2021-04-07	24	1	2	2	5	infirmiere	10	4	2		2	2	2	2	2	1	2	2	1	2	2	2	0	0	0	0	0	0	0	0	0	4	2	4	5	2	5	5	4	1	5	4	4	4	5	5	1	1	2
2021-03-31	21	2	1	2	5	infirmiere	5	4	2	2	2	2	2	2	2	2	2	2	2	2	2	2	0	0	0	0	0	0	0	0	0	2	1	1	5	5	5	5	2	1	5	4	5	1	5	5	1	1	1
2021-04-06	21	2	2	2	5	infirmiere	4	4	2	2	2	2	2	2	2	2	2	2	2	2	2	2	0	0	0	0	0	0	0	0	0	2	2	2	5	5	5	5	1	1	2	2	1	1	2	5	4	1	1
2021-04-08	20	2	2	2	5	infirmiere	6	4	2	2	2	2	2	2	1	2	2	2	2	2	2	2	0	0	0	0	0	0	0	0	0	4	3	4	2	5	5	1	5	1	3	4	5	2	5	3	2	1	3
2021-04-08	22	2	2	2	5	infirmiere	10	4	2	2	2	2	2	2	1	2	2	2	2	2	2	2	0	0	0	0	0	0	0	0	0	2	5	2	5	4	4	5	4	4	5	4	5	4	5	5	4	1	3
2021-04-08	22	2	2	2	5	infirmiere	5	4	2	2	2	2	2	2	2	2	2	2	2	2	2	2	0	0	0	0	0	0	0	0	0	2	2	2	2	2	2	2	2	1	1	2	1	1	2	2	2	1	2
2021-04-09	21	2	2	2	4	infirmiere	9	4	2	2	2	2	2	2	2	1	1	2	2	2	2	2	0	0	0	0	0	0	0	0	0	4	2	4	5	3	5	2	2	2	2	5	1	2	3	5	4	1	5
2021-04-09	20	2	1	2	5	infirmiere	7	4	2	2	2	2	2	2	2	2	1	2	2	1	1	2	0	0	0	0	0	0	0	0	0	2	2	2	5	5	5	5	5	2	5	4	5	5	5	5	2	1	2
2021-04-21	21	2	2	2	5	infirmiere	5	4	2	2	2	2	2	2	2	2	2	1	2	2	2	2	0	0	0	0	0	0	0	0	0	2	2	2	5	2	2	4	4	2	4	4	1	1	4	4	4	2	2
2021-04-22	19	2	2	2	5	infirmiere	5	4	2	2	2	2	2	2	2	2	2	1	1	2	2	2	0	0	0	0	0	0	0	0	0	2	4	2	3	2	2	5	5	1	4	4	4	4	4	4	4	2	4
2021-05-06	26	2	1	2	5	infirmiere	6	4	2	2	2	2	2	2	2	2	2	1	1	1	1	2	0	0	0	0	0	0	0	0	0	2	2	4	5	4	4	4	4	4	4	4	2	2	4	4	2	2	2
2021-05-07	20	2	2	2	5	medecin	4	4	2	2	2	2	2	2	2	2	1	2	2	1	1	2	0	0	0	0	0	0	0	0	0	4	4	4	5	4	2	3	2	2	2	2	2	2	3	2	2	2	2
2021-05-07	21	2	2	2	5	sagef	6	4	2	2	2	2	2	2	2	2	2	2	2	2	2	2	0	0	0	0	0	0	0	0	0	2	2	2	2	2	2	4	4	4	4	4	4	2	4	4	4	2	2
2021-05-17	19	2	2	2	5	sagef	4	4	2	2	2	2	2	2	2	2	2	2	2	1	1	2	0	0	0	0	0	0	0	0	0	2	2	2	5	4	2	5	4	2	2	4	2	2	3	4	4	2	2
2021-03-30	25	2	1	2	4	sagef	10	4	2	2	2	2	2	2	1	1	1	1	1	1	1	2	0	0	0	0	0	0	0	0	0	1	2	4	5	5	5	2	1	1	3	1	1	1	5	2	3	1	2
2021-03-30	22	2	2	2	5	sagef	5	4	2	2	2	2	2	2	2	2	2	1	2	2	2	2	0	0	0	0	0	0	0	0	0	1	1	1	4	4	3	5	3	1	5	5	1	1	5	5	3	4	3
2021-04-20	25	2	3	2	5	infirmiere	4	4	2	2	2	2	2	2	2	2	2	2	2	2	2	2	0	0	0	0	0	0	0	0	0	2	2	2	4	4	2	4	4	2	4	4	1	4	4	5	4	2	4
2021-04-21	21	2	1	2	5	infirmiere	16	4	2	2	2	2	1	2	2	2	2	2	2	2	2	2	0	0	0	0	0	0	0	0	0	2	2	2	2	2	2	5	4	2	5	4	4	2	2	4	2	2	2
2021-04-21	23	2	2	2	5	infirmiere	7	4	2	2	2	2	1	1	2	2	1	1	1	2	2	2	0	0	0	0	0	0	0	0	0	4	4	4	5	2	2	4	4	1	5	4	1	1	3	5	4	2	2
2021-05-03	24	1	2	2	5	infirmiere	11	5	2		2	2	2	2	2	2	2	2	2	2	2	2	0	0	0	0	0	0	0	0	0	2	2	2	4	4	4	5	4	2	4	4	3	2	4	5	2	2	2
2021-04-06	23	2	2	2	5	infirmiere	15	5	2	2	2	2	2	2	2	2	2	2	2	2	2	2	0	0	0	0	0	0	0	0	0	2	2	2	5	2	2	5	4	2	5	4	4	4	4	5	4	4	4
2021-04-30	22	2	1	2	5	medecin	4	5	2	2	2	2	2	2	2	2	2	2	2	2	2	2	0	0	0	0	0	0	0	0	0	2	2	2	2	3	5	5	4	1	5	2	4	2	4	4	4	2	2
2021-05-03	23	2	2	2	5	sagef	8	5	2	2	2	2	2	2	2	1	2	2	2	2	2	2	0	0	0	0	0	0	0	0	0	2	2	2	5	5	5	4	4	2	4	4	4	2	4	4	4	2	2
2021-05-03	25	2	1	2	5	infirmiere	6	5	2	2	2	2	1	2	2	2	1	2	2	1	2	2	0	0	0	0	0	0	0	0	0	2	4	2	4	2	4	4	4	4	4	4	4	4	4	3	2	2	3
2021-05-26	33	1	2	2	4	infirmiere	12	5	1		2	2	2	2	2	2	1	1	1	1	1	2	0	0	0	0	0	0	0	0	0	4	4	4	4	4	4	4	4	4	4	4	4	4	4	5	4	4	2
2021-05-07	18	2	2	2	5	infirmiere	5	5	2	2	2	2	1	2	2	2	2	2	2	2	2	2	0	0	0	0	0	0	0	0	0	4	4	4	5	2	4	5	4	4	4	4	4	4	5	5	4	2	2
2021-03-30	21	2	2	2	5	infirmiere	12	6	2	2	2	2	1	2	2	1	1	2	2	2	2	2	0	0	0	0	0	0	0	0	0	4	5	4	5	5	3	5	3	1	5	5	5	5	5	5	4	1	5
2021-03-31	21	2	2	2	5	infirmiere	11	6	2	2	2	2	1	2	2	2	2	2	2	2	2	2	0	0	0	0	0	0	0	0	0	4	2	4	5	2	2	5	5	3	5	5	5	5	5	5	4	2	2
2021-04-02	22	2	2	2	5	infirmiere	8	6	2	2	2	2	2	2	1	2	1	2	1	2	2	2	0	0	0	0	0	0	0	0	0	4	2	3	5	5	5	5	5	2	2	4	2	1	3	5	4	1	2
2021-04-06	24	2	1	2	5	infirmiere	11	6	2	2	2	2	1	2	1	2	1	2	2	2	2	2	0	0	0	0	0	0	0	0	0	2	2	2	5	4	2	5	4	1	2	2	1	1	5	2	4	1	2
2021-04-08	22	2	1	2	5	infirmiere	10	6	2	2	2	2	2	2	2	2	2	2	2	2	2	2	0	0	0	0	0	0	0	0	0	2	5	2	5	5	2	5	5	4	5	4	5	5	5	5	4	1	4
2021-04-09	36	2	1	2	5	infirmiere	7	6	2	2	2	2	2	2	2	2	1	2	2	2	2	2	0	0	0	0	0	0	0	0	0	4	4	4	4	4	4	4	4	2	4	4	4	2	4	4	4	2	2
2021-04-21	21	2	2	2	5	sagef	8	6	2	2	2	2	2	2	2	1	2	2	2	2	2	2	0	0	0	0	0	0	0	0	0	2	2	2	4	2	2	4	4	4	4	4	4	2	5	5	2	2	2
2021-04-22	34	2	1	2	5	infirmiere	10	6	2	1	2	2	2	2	1	1	1	1	1	2	2	2	0	0	0	0	0	0	0	0	0	2	4	4	5	2	2	5	4	4	5	4	4	4	5	5	4	2	2
2021-07-01	26	2	2	2	5	infirmiere	9	6	2	2	2	2	2	1	1	2	2	2	2	2	2	2	0	0	0	0	0	0	0	0	0	2	2	2	2	3	2	2	2	2	2	2	2	2	4	4	5	2	4
2021-05-07	22	2	2	2	5	infirmiere	6	6	2	2	2	2	2	2	2	2	2	2	2	2	2	2	0	0	0	0	0	0	0	0	0	2	4	4	4	4	4	2	2	2	2	2	4	4	4	2	4	2	2
2021-04-06	25	1	2	2	5	infirmiere	10	7	2		2	2	1	2	2	2	2	2	2	2	2	2	0	0	0	0	0	0	0	0	0	2	4	2	5	5	5	5	2	1	1	5	1	1	3	3	4	1	3
2021-04-22	18	1	2	2	5	infirmiere	10	7	2		2	2	2	2	2	2	2	1	2	2	2	2	0	0	0	0	0	0	0	0	0	2	2	2	5	2	5	4	4	4	4	4	4	4	3	5	4	2	2
2021-04-09	22	2	2	2	5	sagef	7	7	2	2	2	2	1	1	1	2	1	2	2	1	1	2	0	0	0	0	0	0	0	0	0	2	3	2	5	5	5	5	3	1	3	5	1	2	5	4	4	4	1
2021-04-26	24	2	2	2	5	infirmiere	9	7	2	2	2	2	2	2	2	2	2	1	1	2	2	2	0	0	0	0	0	0	0	0	0	2	4	2	4	4	4	4	4	4	4	2	4	4	4	4	4	2	2
2021-05-07	23	2	1	2	5	infirmiere	10	7	2	2	2	2	2	2	2	2	2	1	2	2	2	2	0	0	0	0	0	0	0	0	0	4	4	4	5	5	4	5	5	4	5	4	4	2	5	5	2	2	3
2021-05-07	22	2	1	2	5	infirmiere	10	7	2	2	2	2	2	2	2	2	2	2	2	2	2	2	0	0	0	0	0	0	0	0	0	2	2	2	5	5	4	5	4	2	4	4	2	4	4	4	4	2	2
2021-04-08	21	2	2	2	4	infirmiere	10	8	2	2	2	2	2	2	2	2	2	2	2	2	2	2	0	0	0	0	0	0	0	0	0	2	2	2	2	5	5	2	4	2	5	4	4	1	4	5	2	1	5
2021-05-03	20	2	2	2	5	infirmiere	8	8	2	2	2	2	2	2	2	2	2	2	2	2	2	2	0	0	0	0	0	0	0	0	0	2	2	2	5	2	2	4	2	2	4	4	2	2	2	2	4	2	2
2021-05-18	31	2	2	2	5	medecin	9	8	2	2	2	2	2	2	2	1	1	1	2	1	1	2	0	0	0	0	0	0	0	0	0	4	4	4	5	4	4	5	4	2	5	4	2	3	5	5	4	2	2
2021-04-07	23	2	2	2	5	infirmiere	14	9	2	2	2	2	2	2	2	2	2	1	2	1	2	2	0	0	0	0	0	0	0	0	0	4	5	4	5	5	5	5	4	4	5	4	4	4	5	5	5	1	4
2021-04-06	22	2	2	2	5	infirmiere	15	10	2	2	2	2	1	2	2	1	1	1	1	2	2	2	0	0	0	0	0	0	0	0	0	2	2	2	5	4	3	2	2	2	1	1	2	2	4	3	4	1	4
2021-05-31	29	1	2	2	4	infirmiere	10	10	2		2	2	2	2	2	2	1	2	1	1	1	2	0	0	0	0	0	0	0	0	0	4	4	2	5	4	4	3	2	2	2	2	2	2	4	4	4	2	2
2021-04-09	22	2	2	2	5	infirmiere	22	15	2	2	2	2	1	2	2	2	2	2	2	2	2	2	0	0	0	0	0	0	0	0	0	2	5	4	5	2	5	5	5	2	5	4	2	3	5	5	2	1	3
2021-04-08	25	2	1	2	5	infirmiere	25	20	2	2	2	2	1	2	2	1	2	2	2	1	2	2	0	0	0	0	0	0	0	0	0	2	2	2	5	5	5	5	1	1	5	4	5	1	5	5	1	1	2
2021-05-07	27	2	2	2	5	medecin	25	20	2	2	2	2	1	2	2	2	2	1	1	1	2	2	0	0	0	0	0	0	0	0	0	2	2	4	2	4	4	2	2	2	2	2	2	2	2	2	4	2	2
2021-03-30	20	1	2	2	5	infirmiere	8	5	2		2	2	1	2	2	2	1	2	2	2	2	1	0	0	1	0	0	0	0	0	0	1	1	1	5	5	5	5	3	1	1	3	2	2	5	5	3	1	1
2021-05-06	24	2	2	2	5	infirmiere	4	2	2	2	2	2	1	2	1	2	2	1	2	2	2	1	0	1	0	1	0	0	0	0	0	2	2	2	5	2	4	4	4	4	4	4	4	2	5	5	4	2	2
2021-04-03	32	2	3	2	4	infirmiere	6	3	2	2	2	2	2	2	2	2	1	1	1	1	1	1	0	1	0	1	0	0	0	0	0	4	4	4	4	4	4	4	4	4	4	4	4	4	4	4	2	2	2
2021-05-03	25	2	2	2	5	biologiste	4	3	1	2	2	2	2	2	2	2	1	1	1	1	1	1	0	0	0	0	1	0	0	0	0	4	4	4	2	4	4	2	2	4	2	2	1	2	4	4	1	1	2
2021-05-17	23	2	2	2	5	infirmiere	4	3	2	2	2	1	1	1	2	2	2	2	2	1	1	1	0	0	0	0	1	0	0	0	0	2	4	2	5	4	4	5	5	4	5	4	4	4	4	4	2	2	2
2021-06-04	30	2	1	2	5	infirmiere	4	3	2	2	2	2	2	2	2	2	2	1	1	2	2	1	1	0	1	0	1	0	0	0	0	2	2	2	4	4	4	4	4	2	2	2	4	2	4	4	2	2	2
2021-04-07	23	1	2	2	5	sagef	1	1	2		2	2	2	2	2	2	1	2	1	1	1	1	0	1	1	0	1	0	0	0	0	5	5	5	5	5	5	2	5	1	5	4	3	4	5	5	2	1	1
2021-05-17	27	2	1	2	5	infirmiere	6	3	2	2	2	2	2	2	2	2	1	1	1	2	2	1	0	1	1	0	1	0	0	0	0	2	2	2	5	4	2	4	4	4	4	4	4	2	4	4	3	1	2
2021-04-20	23	1	2	2	5	sagef	5	4	2		2	2	2	2	1	2	1	1	1	2	2	1	0	1	1	0	1	0	0	0	0	4	2	4	5	5	4	5	1	1	1	4	4	1	5	5	1	1	2
2021-04-26	27	2	1	2	5	medecin	6	2	2	2	2	2	1	2	2	1	1	2	1	1	1	1	0	0	0	1	1	0	0	0	0	2	2	2	5	3	5	3	4	2	2	4	3	4	5	5	2	1	2
2021-05-05	28	2	2	2	4	infirmiere	3	2	2	2	2	2	2	2	2	2	1	1	1	1	1	1	0	1	0	1	1	0	0	0	0	4	2	4	4	4	4	4	4	2	2	2	2	2	4	4	2	2	2
2021-05-28	26	2	1	2	5	infirmiere	4	2	2	2	2	2	2	2	1	2	1	1	1	2	2	1	0	1	1	0	1	1	0	0	0	1	3	2	4	2	4	4	4	4	3	4	3	3	4	5	4	2	2
2021-06-05	28	2	1	2	4	biologiste	3	2	2	1	2	2	2	2	2	2	1	1	1	1	1	1	0	0	0	1	1	1	0	0	0	4	4	4	4	4	4	4	4	2	4	4	2	2	4	4	4	2	2
2021-05-04	31	2	2	2	5	biologiste	2	2	2	2	2	2	2	2	2	2	1	2	2	2	2	1	0	0	0	0	0	0	1	0	0	1	4	1	5	4	4	5	4	2	4	4	2	2	5	2	2	2	5
2021-03-30	29	2	1	2	5	sagef	5	2	2	2	2	2	2	2	2	2	2	2	2	2	2	1	0	1	1	0	0	0	1	0	0	1	1	2	5	5	5	5	3	1	3	1	1	1	5	5	4	1	1
2021-05-18	27	1	2	2	4	sagef	2	2	2		2	2	2	2	2	2	2	2	1	2	2	2	0	0	0	0	0	0	0	0	0	3	2	4	4	4	4	3	2	2	2	3	2	2	5	3	2	1	2
2021-05-11	23	2	2	2	4	biologiste	2	2	2	2	2	2	2	2	2	2	1	1	2	1	1	2	0	0	0	0	0	0	0	0	0	4	4	4	4	4	4	3	2	2	2	2	2	2	3	4	2	2	4
2021-04-08	22	2	1	2	5	infirmiere	5	2	2	2	2	2	2	2	2	2	2	2	2	2	2	2	0	0	0	0	0	0	0	0	0	2	2	4	5	4	2	4	2	2	4	4	4	2	2	4	2	2	1
2021-04-21	24	2	1	2	5	infirmiere	4	2	2	2	2	2	2	1	2	2	2	1	2	2	2	2	0	0	0	0	0	0	0	0	0	4	2	2	5	5	4	2	4	4	4	4	4	4	5	5	2	2	1
2021-05-18	22	1	2	2	4	infirmiere	3	3	2		2	2	2	2	2	2	2	2	1	1	1	2	0	0	0	0	0	0	0	0	0	2	3	3	4	4	4	2	3	2	4	3	2	2	4	4	2	2	2
2021-05-03	22	1	2	2	5	infirmiere	5	3	2		2	2	2	2	1	2	1	1	1	1	1	2	0	0	0	0	0	0	0	0	0	4	4	4	5	5	5	5	5	2	4	4	4	4	5	5	4	2	3
2021-03-30	29	2	2	2	5	biologiste	4	3	2	2	2	2	2	2	1	1	1	1	1	1	2	2	0	0	0	0	0	0	0	0	0	1	1	1	5	3	3	4	3	1	4	3	3	3	3	3	4	3	4
2021-05-03	27	2	2	2	5	infirmiere	6	3	2	2	2	2	2	2	1	2	2	1	1	2	2	2	0	0	0	0	0	0	0	0	0	2	2	2	4	4	2	2	4	2	2	2	2	1	4	4	4	1	1
2021-05-11	27	2	1	2	5	biologiste	5	3	1	2	2	2	2	2	2	2	1	1	1	1	2	2	0	0	0	0	0	0	0	0	0	2	2	2	5	4	4	4	3	1	2	2	2	2	2	2	2	2	2
2021-04-07	27	1	2	2	4	sagef	10	4	2		2	2	2	2	2	2	1	2	2	2	2	2	0	0	0	0	0	0	0	0	0	4	5	4	2	4	5	2	1	1	2	2	2	2	5	2	1	1	4
2021-05-05	27	2	1	2	5	infirmiere	6	5	2	2	2	2	2	2	2	2	2	1	1	2	2	2	0	0	0	0	0	0	0	0	0	2	4	2	4	4	2	5	4	2	2	2	4	2	4	4	2	2	2
2021-04-20	22	2	2	2	4	infirmiere	9	7	2	2	2	2	2	2	2	2	2	2	2	1	1	2	0	0	0	0	0	0	0	0	0	2	2	2	4	4	4	4	2	2	4	2	1	2	5	4	4	2	2
2021-04-08	25	2	2	2	5	infirmiere	10	7	2	2	2	2	1	2	1	2	2	2	2	2	2	2	0	0	0	0	0	0	0	0	0	2	5	2	3	2	2	3	2	1	2	4	4	2	4	4	2	2	2
2021-05-05	24	2	2	2	5	medecin	13	10	2	2	2	2	1	2	2	2	2	2	1	2	2	2	0	0	0	0	0	0	0	0	0	2	2	2	4	2	2	2	2	2	2	2	2	2	4	4	4	2	3
2021-05-17	29	2	1	2	5	infirmiere	25	15	1	2	2	2	1	2	2	2	2	1	1	2	2	2	0	0	0	0	0	0	0	0	0	2	2	2	2	2	2	2	2	2	2	3	4	2	5	4	2	2	2
2021-04-19	23	2	1	2	5	infirmiere	4	2	2	1	2	2	2	2	2	2	1	1	1	1	1	1	0	1	1	0	0	0	0	0	0	4	2	2	5	4	4	5	2	1	4	4	4	2	4	4	4	1	4
2021-04-21	50	1	1	2	4	infirmiere	7	4	2		2	1	1	2	1	2	1	1	1	1	1	1	1	1	1	0	0	0	0	0	0	4	4	4	5	4	5	4	4	4	4	4	4	4	5	5	2	2	2
2021-03-31	32	2	1	2	5	infirmiere	6	2	2	2	2	2	2	2	1	2	1	2	1	2	2	1	1	1	0	1	0	0	0	0	0	4	4	4	5	5	5	5	5	5	5	5	5	5	5	5	3	1	1
2021-04-07	27	2	2	2	5	sagef	15	10	2	2	2	2	2	2	1	2	1	1	1	2	2	1	0	0	1	1	0	0	0	0	0	4	5	4	5	2	4	5	4	4	5	4	4	4	5	5	2	1	5
2021-04-19	44	2	4	2	5	infirmiere	8	5	2	2	2	2	1	2	1	1	2	2	2	2	2	1	0	1	1	1	0	0	0	0	0	4	4	4	4	4	4	4	4	4	2	4	4	2	4	4	4	2	2
2021-04-02	25	2	2	2	4	sagef	10	7	2	2	2	2	2	2	2	2	2	1	1	1	1	1	0	1	1	1	0	0	0	0	0	2	5	3	5	2	2	5	2	4	5	2	5	2	5	5	5	1	1
2021-04-14	25	2	2	2	5	infirmiere	7	2	2	2	2	2	2	1	2	2	1	1	1	2	2	1	0	0	0	0	1	0	0	0	0	4	4	4	4	4	4	4	4	4	4	4	4	4	5	5	4	1	2
2021-04-19	22	1	2	2	5	infirmiere	4	3	2		2	2	2	2	2	2	2	1	1	2	2	1	0	0	0	0	1	0	0	0	0	4	2	4	5	5	5	5	5	1	5	2	4	1	5	5	1	1	1
2021-04-20	22	2	1	2	5	ats	4	3	2	2	2	2	2	2	2	2	1	1	1	2	2	1	0	0	0	0	1	0	0	0	0	2	2	2	3	2	2	3	3	1	2	4	1	1	4	4	2	2	2
2021-03-31	25	2	2	2	5	infirmiere	8	7	2	2	2	2	2	2	2	2	1	1	1	2	2	1	0	0	0	0	1	0	0	0	0	5	5	5	5	5	5	5	3	1	5	5	5	1	5	5	4	1	1
2021-04-19	30	2	2	2	5	medecin	14	8	2	2	2	2	2	2	2	2	2	2	2	2	2	1	0	0	0	0	1	0	0	0	0	2	2	2	4	4	4	4	2	2	4	2	2	2	5	4	2	2	1
2021-05-06	29	1	2	2	5	biologiste	15	10	2		2	2	2	2	2	2	2	1	1	2	2	1	0	0	0	0	1	0	0	0	0	4	4	4	5	4	2	4	2	2	2	2	2	2	5	5	4	2	2
2021-07-14	29	1	2	2	5	ats	6	3	2		2	2	2	2	2	2	1	1	1	2	2	1	1	1	0	0	1	0	0	0	0	4	4	5	4	4	4	3	2	2	2	4	2	4	5	5	2	2	2
2021-03-31	27	1	1	2	4	biologiste	2	2	2		2	2	2	2	2	2	2	2	2	2	2	1	0	1	1	0	1	0	0	0	0	4	4	4	5	5	3	5	3	1	5	4	1	2	5	3	5	3	2
2021-05-17	22	2	1	2	4	infirmiere	3	3	2	2	2	2	2	2	2	2	1	1	1	1	1	1	0	1	1	0	1	0	0	0	0	2	4	2	5	2	4	5	4	4	5	4	2	4	5	4	2	1	2
2021-04-20	23	2	2	2	5	infirmiere	4	2	2	2	2	2	1	2	2	2	1	2	1	1	1	1	0	0	0	1	1	0	0	0	0	4	2	4	5	4	4	2	4	2	5	4	3	1	5	5	4	2	2
2021-05-06	30	1	1	2	4	infirmiere	3	2	2		2	2	2	2	1	2	1	1	1	2	2	1	0	0	0	1	1	0	0	0	0	4	4	4	5	4	4	2	4	2	4	5	2	2	4	5	4	2	2
2021-05-19	58	2	4	2	5	medecin	3	2	2	2	2	2	2	2	1	1	1	2	1	2	2	1	0	1	0	1	1	0	0	0	0	4	4	4	4	4	4	4	4	2	4	4	4	4	4	4	4	2	2
2021-04-29	20	2	2	2	5	infirmiere	18	16	2	2	2	2	2	2	2	2	1	1	1	1	2	1	0	1	0	1	1	0	0	0	0	2	2	2	4	2	2	4	4	4	4	4	4	2	4	4	4	2	2
2021-04-19	45	2	1	2	5	infirmiere	7	3	2	2	2	2	2	2	1	1	1	1	1	2	2	1	0	0	1	1	1	0	0	0	0	4	4	4	4	4	4	2	4	4	4	4	2	2	4	4	2	2	2
2021-05-28	26	1	2	2	4	infirmiere	4	3	2		2	2	2	2	1	2	1	1	1	1	1	1	0	0	1	1	1	0	0	0	0	4	2	2	4	4	4	2	2	2	2	2	2	2	4	4	4	2	2
2021-05-03	22	2	2	2	5	biologiste	15	5	2	2	2	2	2	2	2	2	1	1	1	1	1	1	0	0	1	1	1	0	0	0	0	4	4	4	3	4	2	2	2	2	2	2	2	2	4	4	4	2	2
2021-05-26	22	2	1	2	5	medecin	12	7	2	2	2	2	1	2	1	2	1	1	1	1	1	1	0	0	1	1	1	0	0	0	0	4	4	4	4	4	4	4	4	2	4	4	4	4	5	5	5	2	2
2021-05-24	26	1	2	2	5	infirmiere	3	3	2		2	2	2	2	2	2	1	1	1	1	2	1	0	0	1	0	0	1	0	0	0	4	4	4	4	4	4	4	4	2	4	2	2	2	4	4	2	2	4
2021-05-07	27	1	1	2	4	biologiste	3	2	2		2	2	2	2	2	1	1	1	1	1	2	1	0	1	1	0	0	1	0	0	0	1	4	4	5	4	4	4	4	2	4	5	2	2	3	4	4	2	2
2021-04-08	30	2	2	2	4	medecin	8	2	2	2	2	2	1	2	1	2	1	1	1	1	2	1	0	0	0	0	1	1	0	0	0	2	2	2	4	4	2	4	2	2	2	2	2	2	4	4	2	2	2
2021-05-19	19	1	2	2	5	infirmiere	5	3	2		2	2	2	1	1	2	1	1	1	2	2	1	1	0	0	0	1	1	0	0	0	4	4	4	4	4	4	2	2	2	2	2	2	2	4	4	2	2	2
2021-06-04	50	1	1	2	4	sagef	9	7	2		2	1	2	2	2	2	1	1	1	1	1	1	1	0	0	0	1	1	0	0	0	2	4	3	4	4	4	4	2	2	2	4	2	4	4	4	4	2	2
2021-06-05	24	1	2	2	4	infirmiere	2	2	2		2	2	2	2	2	2	1	1	1	1	1	1	0	0	0	1	1	1	0	0	0	4	4	4	4	4	4	5	4	4	4	4	4	4	4	4	4	2	2
2021-06-28	26	2	2	2	4	ats	12	8	2	2	2	2	2	2	2	2	2	1	1	2	2	1	0	0	0	1	1	1	0	0	0	1	4	4	5	5	5	4	5	1	2	1	1	1	5	5	1	1	2
2021-06-04	59	2	1	2	5	infirmiere	5	5	2	2	2	1	2	2	1	2	1	1	1	1	1	1	1	0	1	0	0	0	1	0	0	2	4	4	4	4	4	4	4	4	4	4	2	4	5	4	4	2	2
2021-04-20	23	2	2	2	5	para	8	3	2	2	2	2	1	2	1	2	1	1	2	2	2	1	0	1	1	0	0	0	1	0	0	2	2	2	5	5	3	5	5	4	5	4	5	4	3	3	4	2	3
2021-06-04	29	2	1	2	5	infirmiere	7	5	2	2	2	2	2	2	2	2	1	1	1	1	1	1	1	0	0	1	0	0	1	0	0	2	1	1	1	1	4	4	1	4	4	4	4	4	4	4	4	1	4
2021-05-07	25	2	1	2	5	biologiste	4	2	2	2	2	2	2	2	2	2	2	1	1	2	2	1	0	1	0	1	0	0	1	0	0	2	2	2	5	2	2	5	4	2	2	3	4	2	5	4	4	2	2
2021-05-07	27	1	2	2	5	medecin	10	10	1		2	2	2	2	2	1	1	1	1	1	1	1	0	1	0	1	0	0	1	0	0	2	2	4	5	2	5	5	2	4	2	2	4	4	4	4	4	2	2
2021-03-30	36	1	2	2	5	infirmiere	7	4	2		2	2	2	2	2	2	1	1	1	1	1	1	0	0	1	1	0	0	1	0	0	1	1	1	5	5	5	5	5	1	1	1	2	1	5	5	2	1	1
2021-05-17	23	1	2	2	4	infirmiere	7	6	2		2	2	1	2	2	2	1	1	1	1	1	1	0	0	0	0	1	0	1	0	0	2	2	2	5	4	4	4	5	2	4	4	3	2	5	2	2	1	2
2021-05-28	30	1	1	2	4	infirmiere	3	3	2		2	2	2	2	1	2	1	1	1	1	1	1	0	0	1	0	1	0	1	0	0	4	4	4	4	4	4	3	4	2	4	2	2	2	4	4	2	2	2
2021-05-29	22	1	2	2	5	infirmiere	5	4	2		2	2	2	2	2	1	1	1	1	2	2	1	0	1	0	0	0	0	1	1	0	2	2	2	5	2	5	5	2	2	4	4	4	2	4	5	2	2	2
2021-05-26	22	2	1	2	5	medecin	3	3	2	2	2	2	2	2	2	2	1	1	1	2	2	1	0	0	0	0	1	0	1	1	0	4	4	4	4	4	4	4	4	4	4	4	4	4	4	4	4	4	4
2021-05-03	48	2	1	2	4	sagef	10	7	2	2	2	2	2	2	2	2	1	1	1	2	2	1	0	0	0	0	0	0	0	0	1	4	4	4	4	2	4	4	4	2	4	2	2	2	4	4	4	2	4
2021-05-03	49	2	1	2	3	infirmiere	19	8	2	2	2	2	2	2	2	2	1	1	1	2	2	1	0	0	0	0	0	0	0	0	1	4	4	4	4	4	4	4	4	3	4	4	2	2	2	4	2	2	4
2021-05-21	27	2	2	2	4	infirmiere	22	6	2	2	2	2	2	2	1	2	1	1	1	1	1	1	0	0	1	0	1	0	0	0	1	2	2	2	4	4	4	2	2	2	2	4	2	2	4	4	4	4	4
2021-06-28	28	2	1	2	5	medecin	6	3	1	2	2	2	1	2	2	2	1	1	1	1	1	1	0	0	0	0	1	1	0	0	1	3	3	3	5	4	4	4	3	3	4	4	2	2	4	4	1	1	1
2021-03-31	23	2	2	2	5	medecin	14	1	2	2	2	2	2	2	1	2	1	1	1	2	2	2	0	0	0	0	0	0	0	0	0	4	4	4	4	2	4	4	4	2	4	3	3	2	3	3	2	2	2
2021-04-28	20	2	2	2	5	infirmiere	8	1	2	2	2	2	2	2	1	2	2	1	2	2	2	2	0	0	0	0	0	0	0	0	0	2	2	4	4	2	4	2	2	2	2	2	2	2	4	4	4	2	2
2021-03-30	25	1	2	2	4	infirmiere	1	1	2		2	2	2	2	2	2	2	2	2	2	2	2	0	0	0	0	0	0	0	0	0	1	5	4	5	5	5	5	5	1	5	5	3	3	5	1	5	1	1
2021-05-25	35	2	1	2	4	medecin	7	1	2	2	2	2	2	2	2	2	1	1	1	1	1	2	0	0	0	0	0	0	0	0	0	4	4	4	4	4	4	2	4	4	4	4	4	4	4	4	2	2	2
2021-05-31	23	1	2	2	5	ats	5	2	2		2	2	1	2	2	2	1	2	1	2	2	2	0	0	0	0	0	0	0	0	0	4	4	4	4	4	3	3	4	2	2	2	1	1	3	3	2	2	4
2021-04-29	21	2	2	2	5	infirmiere	6	2	2	2	2	2	2	2	2	2	2	2	2	2	2	2	0	0	0	0	0	0	0	0	0	2	2	2	4	4	4	4	4	4	4	4	2	4	4	4	2	2	2
2021-06-01	25	1	2	2	4	infirmiere	5	2	2		2	2	2	2	1	2	1	1	1	1	1	2	0	0	0	0	0	0	0	0	0	4	4	2	5	5	4	4	2	2	4	3	3	4	3	3	2	1	1
2021-04-19	25	1	1	2	5	medecin	2	2	1		2	2	2	2	2	2	1	1	1	2	2	2	0	0	0	0	0	0	0	0	0	1	1	1	5	5	5	5	4	4	5	3	4	1	4	5	2	1	1
2021-06-02	32	1	2	2	5	medecin	2	2	2		2	2	1	2	1	2	1	1	1	1	1	2	0	0	0	0	0	0	0	0	0	4	4	4	4	4	4	4	2	2	2	4	4	2	4	4	2	2	2
2021-04-19	26	2	1	2	5	sagef	6	2	2	2	2	2	2	2	1	1	1	1	1	1	2	2	0	0	0	0	0	0	0	0	0	4	4	3	5	4	2	5	5	4	5	4	4	4	5	4	2	2	2
2021-04-17	29	1	2	2	4	infirmiere	2	2	2		2	2	1	2	2	2	1	1	1	1	2	2	0	0	0	0	0	0	0	0	0	4	4	4	4	4	2	2	4	2	2	4	2	2	4	4	4	2	2
2021-06-04	41	1	3	2	4	infirmiere	5	2	2		2	2	2	2	2	1	1	1	1	1	1	2	0	0	0	0	0	0	0	0	0	2	4	2	4	4	2	4	4	4	4	2	4	2	4	4	2	2	2
2021-06-01	26	2	2	2	5	medecin	2	2	2	2	2	2	2	2	2	2	2	2	1	2	2	2	0	0	0	0	0	0	0	0	0	2	4	2	4	4	4	4	4	4	4	4	2	2	4	4	2	2	4
2021-04-03	32	1	2	2	5	medecin	3	3	2		2	2	2	2	2	2	1	1	1	1	1	2	0	0	0	0	0	0	0	0	0	1	1	1	5	5	5	3	2	2	2	4	2	2	4	4	4	2	2
2021-06-29	27	2	2	2	5	medecin	10	3	2	2	2	2	2	2	2	2	2	2	1	2	2	2	0	0	0	0	0	0	0	0	0	4	4	4	4	4	4	4	4	2	4	4	2	4	4	4	4	2	2
2021-04-30	35	2	1	2	4	infirmiere	8	3	2	2	2	2	2	2	2	2	2	2	2	2	2	2	0	0	0	0	0	0	0	0	0	4	4	4	4	4	4	2	4	2	2	2	2	2	4	4	4	2	2
2021-04-20	29	1	1	2	4	infirmiere	4	3	2		2	2	2	2	2	2	2	1	1	2	2	2	0	0	0	0	0	0	0	0	0	2	4	2	4	2	2	5	4	2	4	2	2	2	4	4	4	2	4
2021-04-30	30	1	2	2	4	medecin	7	3	2		2	2	2	2	2	2	1	1	2	1	2	2	0	0	0	0	0	0	0	0	0	2	4	4	4	4	4	4	4	4	4	2	2	2	4	4	4	2	2
2021-04-20	26	1	2	2	5	sagef	6	4	2		2	2	2	2	1	2	2	2	2	2	2	2	0	0	0	0	0	0	0	0	0	2	2	3	4	4	4	3	2	1	2	4	1	2	3	4	2	2	2
2021-03-31	28	2	2	2	5	infirmiere	8	4	2	2	2	2	2	2	2	2	2	1	1	1	2	2	0	0	0	0	0	0	0	0	0	3	3	3	5	3	3	5	3	1	5	4	5	3	5	3	4	1	1
2021-05-20	36	1	1	2	4	infirmiere	7	4	2		2	2	1	2	1	1	1	2	2	2	2	2	0	0	0	0	0	0	0	0	0	4	4	2	4	4	4	4	4	2	4	2	2	2	4	4	4	2	2
2021-04-01	29	2	2	2	5	sagef	9	4	2	2	2	2	2	2	1	1	2	2	2	1	1	2	0	0	0	0	0	0	0	0	0	1	5	2	5	3	5	5	5	3	2	3	3	3	5	2	3	1	3
2021-04-01	32	2	1	2	5	infirmiere	10	5	2	1	2	2	2	2	2	2	2	2	2	2	2	2	0	0	0	0	0	0	0	0	0	5	3	3	5	1	2	3	3	1	3	4	2	2	3	4	1	1	2
2021-04-19	22	2	2	2	5	infirmiere	8	5	2	2	2	2	2	2	2	1	2	1	2	2	2	2	0	0	0	0	0	0	0	0	0	2	2	2	5	4	2	4	1	1	1	4	3	4	4	4	2	2	2
2021-07-14	41	2	3	2	5	medecin	6	5	2	2	2	2	2	2	2	1	1	1	2	2	2	2	0	0	0	0	0	0	0	0	0	3	2	2	4	4	4	2	2	2	2	2	2	3	4	4	2	2	3
2021-03-31	24	2	1	2	5	infirmiere	7	6	2	2	2	2	2	2	2	2	2	2	2	2	2	2	0	0	0	0	0	0	0	0	0	1	1	1	5	2	2	5	3	2	5	5	1	1	4	5	5	1	2
2021-04-09	26	2	2	2	5	biologiste	7	6	2	2	2	2	2	2	2	1	1	1	1	1	2	2	0	0	0	0	0	0	0	0	0	3	4	3	5	4	2	5	2	2	3	4	1	1	3	5	2	2	5
2021-06-08	33	2	1	2	4	infirmiere	12	8	2	2	2	2	2	2	2	1	1	1	1	1	2	2	0	0	0	0	0	0	0	0	0	4	2	3	3	4	4	4	2	2	2	2	2	2	4	4	2	2	2
2021-07-02	26	2	2	2	5	infirmiere	18	11	2	2	2	2	2	2	2	2	1	2	2	2	2	2	0	0	0	0	0	0	0	0	0	4	4	4	4	4	4	4	5	4	4	4	4	4	4	4	4	2	4
2021-04-14	24	1	2	2	4	infirmiere	8	6	2		2	2	2	2	2	2	1	2	2	1	1	1	0	0	0	1	0	0	0	0	0	2	4	4	2	4	2	2	2	2	2	3	1	2	4	4	2	2	2
2021-05-05	25	2	1	2	5	infirmiere	2	2	2	2	2	2	2	2	2	2	1	1	2	2	2	1	0	1	0	1	0	0	0	0	0	1	4	2	4	2	2	5	4	2	2	2	2	2	5	4	2	2	2
2021-05-06	24	1	2	2	5	infirmiere	5	4	2		2	2	2	2	2	2	1	1	1	2	2	1	0	0	0	0	1	1	0	0	0	2	4	4	4	4	4	4	2	2	2	4	2	2	2	4	4	2	4
2021-07-14	38	1	1	2	5	sagef	9	4	2		2	2	2	2	1	2	1	1	1	1	1	1	0	1	0	0	1	1	0	0	0	3	4	4	4	4	2	2	4	2	2	2	2	1	4	4	2	2	2
2021-07-15	40	1	1	2	5	ats	8	5	2		2	1	2	2	1	2	1	1	1	1	2	1	0	0	0	1	1	1	0	0	0	2	4	2	2	4	2	2	3	2	3	2	2	1	4	4	2	1	3
2021-06-05	31	1	2	2	5	medecin	2	2	2		2	2	2	2	2	2	1	1	1	1	1	1	0	0	0	1	1	0	1	0	0	4	4	4	4	4	4	2	4	2	2	4	2	2	4	4	4	2	2
2021-07-14	28	2	2	2	4	infirmiere	8	5	2	2	2	2	1	2	1	2	2	1	1	2	2	1	0	0	0	0	1	1	1	0	0	2	5	2	4	3	3	3	2	2	2	2	2	3	4	4	4	2	2
2021-05-05	30	2	2	2	5	biologiste	9	5	2	2	2	2	2	2	2	2	2	2	2	2	2	1	0	0	0	0	0	0	1	1	0	3	2	2	4	2	4	2	2	2	2	2	2	2	5	5	4	2	2
2021-04-14	34	2	1	2	4	infirmiere	6	2	2	2	2	2	2	2	2	2	1	1	1	1	1	2	0	0	0	0	0	0	0	0	0	2	2	2	2	2	2	2	2	2	2	2	2	2	3	3	2	2	2
2021-07-14	26	2	1	2	5	biologiste	4	4	2	1	2	2	1	2	2	2	1	1	1	2	2	2	0	0	0	0	0	0	0	0	0	2	5	4	5	4	4	5	4	4	4	4	3	4	4	5	4	2	2
2021-04-14	28	1	2	2	4	infirmiere	10	6	2		2	2	2	2	2	2	2	2	2	1	2	2	0	0	0	0	0	0	0	0	0	2	2	4	4	2	4	5	4	1	5	4	4	3	4	5	2	2	4
2021-06-05	29	2	1	2	5	medecin	10	8	2	2	2	2	2	2	2	2	1	1	1	1	1	2	0	0	0	0	0	0	0	0	0	2	2	4	4	4	2	3	4	2	2	2	2	2	5	5	2	2	2
2021-05-11	27	1	2	2	4	infirmiere	6	4	2		2	2	2	2	2	2	1	1	1	1	1	1	0	1	1	0	1	0	0	0	0	4	4	4	4	4	4	2	2	2	2	1	1	1	4	4	2	2	2
2021-03-24	20	2	2	2	4	infirmiere	5	4	2	2	2	1	2	1	2	2	2	1	1	2	1	1	0	0	1	1	1	0	0	0	0	2	4	2	4	4	4	4	4	4	4	3	1	2	4	4	2	4	2
2021-05-30	46	1	1	2	4	biologiste	4	2	2		2	2	2	2	2	2	1	1	1	1	1	1	0	0	0	1	1	1	0	0	0	2	2	2	4	4	2	2	2	2	2	3	1	1	4	4	2	2	2
2021-06-28	32	2	2	2	5	infirmiere	9	5	2	2	2	2	2	2	2	2	1	1	1	1	1	1	1	1	0	0	0	0	1	0	0	2	5	4	4	4	4	4	4	4	4	4	4	4	4	4	4	2	2
2021-06-28	26	2	1	2	5	medecin	6	4	1	2	2	2	2	2	1	2	1	1	1	1	1	1	0	0	0	0	1	0	1	1	0	3	3	3	5	5	5	4	4	2	4	4	3	3	5	5	1	1	1
2021-04-20	28	2	1	2	4	sagef	4	2	2	2	2	2	2	2	2	2	2	2	2	2	2	2	0	0	0	0	0	0	0	0	0	2	2	2	4	4	4	4	2	2	4	4	1	1	2	4	4	2	1
2021-04-09	31	1	1	2	5	infirmiere	6	2	2		2	2	2	2	2	2	1	1	1	1	1	2	0	0	0	0	0	0	0	0	0	4	3	2	4	4	4	2	4	2	2	4	2	2	4	4	2	2	2
2021-06-04	30	2	2	2	4	infirmiere	2	2	2	2	2	2	2	1	1	2	1	1	1	1	1	2	0	0	0	0	0	0	0	0	0	2	2	2	4	2	2	3	2	1	2	2	1	1	4	4	4	2	2
2021-06-29	29	2	2	2	5	infirmiere	7	5	2	2	2	2	2	2	2	2	2	2	2	2	2	2	0	0	0	0	0	0	0	0	0	2	5	2	4	3	4	4	4	2	2	2	2	2	4	4	4	2	4
2021-05-24	32	2	2	2	5	infirmiere	15	7	2	2	2	2	1	2	2	2	1	1	1	1	1	2	0	0	0	0	0	0	0	0	0	4	4	4	4	4	4	4	4	2	2	2	2	2	4	4	4	2	2
2021-05-24	45	1	1	2	5	medecin	10	5	2		2	2	2	2	2	2	1	1	1	1	1	1	1	1	0	0	1	0	0	0	0	2	4	2	4	4	5	2	4	2	2	4	2	2	4	4	4	2	2
2021-05-24	38	2	1	2	5	medecin	9	7	2	2	2	2	2	2	2	2	1	1	1	1	1	1	1	0	1	0	1	0	0	0	0	2	3	2	1	3	4	5	4	4	4	4	4	4	4	4	1	1	1
2021-04-07	23	2	1	2	5	infirmiere	3	2	2	2	2	2	1	2	1	1	1	1	1	1	1	1	0	1	0	1	1	0	0	0	0	2	2	3	5	5	5	5	4	1	5	4	1	1	3	5	1	1	1
2021-04-13	29	2	2	2	4	medecin	9	2	2	2	2	2	2	2	2	2	1	1	1	1	1	1	0	1	0	1	1	0	0	0	0	4	4	4	4	4	4	2	2	2	2	3	2	2	4	4	2	2	2
2021-06-01	30	1	2	2	4	sagef	5	4	2		2	2	2	2	2	2	1	1	1	1	1	1	0	0	0	1	1	1	0	0	0	4	4	4	4	4	4	2	2	2	2	2	1	1	4	4	4	4	4
2021-05-05	41	2	2	2	5	infirmiere	4	1	2	2	1	2	2	2	2	2	1	1	1	2	2	1	0	1	0	1	0	0	1	0	0	4	4	4	4	2	4	5	2	2	2	4	2	4	2	4	4	2	3
2021-05-31	42	2	1	2	4	infirmiere	2	2	1	2	2	2	2	1	1	2	1	1	1	1	1	1	0	0	0	0	1	1	1	0	0	4	4	4	4	4	4	4	2	2	4	4	4	2	4	4	4	4	4
2021-06-28	30	2	1	2	5	infirmiere	5	3	2	1	2	2	2	2	2	2	1	1	1	1	1	1	0	0	0	0	0	0	0	1	0	4	3	4	4	4	4	4	4	2	4	4	2	2	4	4	1	2	2
2021-07-01	30	2	1	2	5	sagef	5	2	2	2	2	2	2	2	2	2	1	2	2	2	2	2	0	0	0	0	0	0	0	0	0	4	4	4	4	4	2	2	2	2	2	2	2	2	4	4	2	2	4
2021-04-09	25	1	2	2	5	medecin	4	3	2		2	2	2	2	2	2	2	1	2	1	2	2	0	0	0	0	0	0	0	0	0	3	2	2	2	3	2	2	2	2	1	2	1	2	3	4	3	1	3
2021-07-01	35	2	1	2	5	sagef	6	6	2	2	2	2	2	2	2	2	2	2	2	2	2	2	0	0	0	0	0	0	0	0	0	2	4	2	5	5	3	3	3	2	4	3	2	3	4	4	2	2	2
2021-06-29	30	2	1	2	5	biologiste	12	7	2	2	2	2	1	2	1	2	1	1	1	2	2	2	0	0	0	0	0	0	0	0	0	2	4	3	2	4	3	4	4	2	2	2	2	4	4	4	2	2	2
2021-05-18	36	1	2	2	4	medecin	3	3	2		2	2	2	2	2	2	1	1	1	1	1	2	0	0	0	0	0	0	0	0	0	4	4	4	5	5	5	2	2	2	2	4	2	2	4	3	4	2	2
2021-06-29	40	2	1	2	5	infirmiere	8	2	1	2	2	2	2	2	2	2	1	1	1	1	1	1	1	1	0	0	0	0	0	0	0	4	5	4	4	4	4	4	4	2	2	4	2	4	4	4	4	2	2
2021-05-11	36	1	1	2	4	medecin	7	3	2		2	2	2	2	2	2	2	2	2	2	2	1	0	0	1	0	0	0	0	0	0	2	2	2	4	2	4	5	4	4	5	4	4	2	5	5	4	1	2
2021-05-11	30	1	1	2	4	infirmiere	4	2	2		2	2	2	2	2	2	1	1	1	1	2	1	0	1	1	0	0	0	0	0	0	4	4	2	4	5	4	4	4	2	4	4	2	2	4	4	2	2	2
2021-04-22	45	2	1	2	5	medecin	7	3	2	2	2	2	2	2	2	2	1	1	1	1	1	1	0	1	1	0	0	0	0	0	0	2	2	2	4	2	2	4	4	4	4	4	4	2	4	5	2	2	2
2021-06-30	27	1	2	2	4	sagef	1	1	2		2	2	2	2	2	2	1	1	1	1	1	1	1	1	1	0	0	0	0	0	0	1	4	4	4	4	4	4	4	4	4	4	4	4	4	4	2	2	2
2021-04-02	28	2	1	2	5	medecin	3	2	2	2	2	2	2	2	2	2	1	1	2	2	2	1	0	0	0	1	0	0	0	0	0	4	5	4	5	5	4	5	4	4	5	4	4	4	5	5	2	1	4
2021-04-02	31	1	1	2	4	infirmiere	4	2	2		2	2	2	2	1	2	1	1	1	1	1	1	0	0	0	1	0	0	0	0	0	5	5	5	4	5	5	4	2	1	1	2	2	1	5	3	2	1	1
2021-04-21	30	2	1	2	5	ats	7	4	2	1	2	1	2	2	2	2	1	1	1	1	2	1	0	0	0	1	0	0	0	0	0	4	4	4	4	2	2	5	4	2	4	4	4	1	5	5	4	2	1
2021-05-06	30	1	1	2	4	medecin	4	3	2		2	2	2	2	1	2	1	2	1	1	2	1	0	1	0	1	0	0	0	0	0	4	4	2	4	4	4	4	4	2	4	4	2	4	4	4	4	2	2
2021-04-01	28	2	2	2	5	biologiste	8	6	2	2	2	2	2	2	1	2	2	2	1	2	2	1	0	1	0	1	0	0	0	0	0	3	4	2	2	2	3	5	5	5	5	4	5	5	3	5	4	1	1
2021-06-08	45	2	1	2	5	medecin	6	4	2	2	2	2	2	2	2	2	1	1	2	1	1	1	0	1	1	1	0	0	0	0	0	2	2	2	4	4	4	4	4	4	4	4	2	2	4	4	2	2	2
2021-04-14	29	2	1	2	4	infirmiere	3	1	2	2	2	2	2	2	2	2	2	1	2	2	2	1	0	0	0	0	1	0	0	0	0	2	2	2	5	4	4	5	3	1	1	4	1	1	4	4	1	1	5
2021-05-11	38	1	1	2	4	medecin	5	2	2		2	2	2	1	1	2	2	1	1	1	2	1	0	0	0	0	1	0	0	0	0	2	4	4	4	4	2	2	2	2	1	4	1	1	4	4	4	2	4
2021-05-11	24	1	2	2	4	medecin	4	4	2		2	2	2	2	2	1	1	1	1	1	1	1	0	0	0	0	1	0	0	0	0	5	4	4	5	5	5	2	3	2	1	2	2	2	5	5	2	2	3
2021-04-21	28	1	1	2	5	medecin	5	5	2		2	2	2	2	2	2	1	1	2	2	2	1	0	0	0	0	1	0	0	0	0	2	4	2	3	3	3	5	4	1	2	4	2	1	5	5	2	2	2
2021-07-02	35	1	1	2	4	biologiste	3	3	1		2	2	1	2	2	2	1	1	1	1	1	1	1	0	1	0	1	0	0	0	0	4	4	4	4	4	4	3	3	2	3	4	2	2	4	4	1	2	2
2021-05-17	26	1	2	2	4	biologiste	1	1	2		2	2	2	2	2	2	1	1	2	1	1	1	0	1	1	0	1	0	0	0	0	4	4	4	5	4	3	3	4	2	4	4	2	2	4	4	2	2	2
2021-05-17	27	1	2	2	4	biolog	4	4	2		2	2	2	2	2	2	1	1	1	1	1	1	0	1	1	0	1	0	0	0	0	4	4	4	5	4	4	4	4	2	4	4	2	2	4	4	4	2	2
2021-05-11	35	1	1	2	4	infirmiere	16	6	2		2	2	2	2	1	2	1	1	1	1	1	1	0	1	1	0	1	0	0	0	0	4	4	4	4	5	5	2	4	2	2	5	2	2	2	3	2	2	3
2021-05-06	29	1	2	2	4	medecin	1	1	2		2	2	2	2	2	2	1	2	1	1	1	1	0	0	0	1	1	0	0	0	0	5	4	4	5	2	4	5	3	4	5	4	4	2	4	4	4	2	2
2021-05-11	39	1	1	2	4	infirmiere	9	4	2		2	2	2	2	2	2	1	1	1	1	1	1	1	0	0	1	1	0	0	0	0	4	2	2	4	4	2	4	2	2	2	4	1	1	5	5	4	2	1
2021-05-24	27	1	2	2	5	infirmiere	12	5	2		2	2	2	2	2	2	1	1	1	1	1	1	1	0	0	1	1	0	0	0	0	4	4	4	5	5	5	3	2	2	2	2	2	2	4	4	4	2	2
2021-05-04	29	1	2	2	4	medecin	1	1	2		2	2	2	2	2	2	1	1	1	1	2	1	0	1	0	1	1	0	0	0	0	5	4	2	5	4	4	4	2	2	4	3	4	2	4	4	2	2	2
2021-05-20	31	2	1	2	5	medecin	4	2	2	2	2	2	1	2	1	1	1	1	1	2	2	1	0	1	0	1	1	0	0	0	0	2	4	4	4	4	4	4	4	4	4	4	4	4	4	4	4	2	2
2021-06-30	23	2	1	2	5	medecin	4	2	2	2	2	2	1	2	2	1	1	2	2	2	2	1	0	1	0	1	1	0	0	0	0	3	4	4	4	4	4	3	2	2	4	4	2	2	4	4	2	2	3
2021-04-07	28	1	2	2	4	medecin	4	4	2		2	2	2	2	1	1	1	1	1	1	1	1	0	1	0	1	1	0	0	0	0	5	5	4	5	5	5	5	3	1	1	2	1	2	5	4	4	1	2
2021-06-28	30	2	1	2	4	medecin	7	3	1	2	2	2	1	2	2	2	1	1	1	1	1	1	0	0	0	0	0	1	0	0	0	3	1	3	5	5	5	3	4	1	1	3	5	1	5	5	1	1	1
2021-06-29	25	1	2	2	4	medecin	5	2	2		2	2	2	2	2	2	1	1	1	1	1	1	0	1	0	0	0	1	0	0	0	4	4	4	5	4	4	4	3	2	4	1	1	3	5	5	1	1	1
2021-05-06	25	1	2	2	4	medecin	6	6	2		2	2	2	2	2	2	1	1	1	1	2	1	0	1	1	0	0	1	0	0	0	4	4	4	4	4	2	5	4	4	4	4	4	2	4	5	2	2	2
2021-06-02	34	1	1	2	4	infirmiere	2	2	2		2	2	2	2	2	1	1	1	1	1	1	1	0	1	0	1	0	1	0	0	0	4	4	2	4	4	4	4	2	1	1	4	1	1	4	3	4	4	2
2021-05-03	35	1	1	2	4	medecin	4	2	2		2	2	2	2	2	2	2	2	2	1	2	1	0	0	0	0	1	1	0	0	0	4	4	4	5	4	4	4	2	1	2	2	1	1	3	2	2	2	1
2021-07-01	34	1	2	2	4	infirmiere	3	2	2		2	2	2	2	2	2	1	1	1	1	1	1	1	1	0	0	1	1	0	0	0	4	5	4	4	4	4	2	2	2	2	2	2	2	4	4	2	2	2
2021-05-18	36	1	1	2	5	infirmiere	7	4	2		2	2	2	2	2	1	1	1	1	1	2	1	0	0	1	0	1	1	0	0	0	4	4	4	5	4	5	5	4	2	5	2	2	2	5	5	2	2	2
2021-06-01	37	2	1	2	4	medecin	14	9	2	2	2	2	1	2	1	2	2	1	2	2	2	1	0	0	0	1	1	1	0	0	0	2	4	4	4	4	4	4	2	2	4	2	2	2	4	4	2	2	2
2021-05-06	38	2	1	2	5	medecin	7	1	2	2	2	2	2	2	2	2	1	1	1	1	1	1	0	1	0	0	0	0	1	0	0	4	2	4	4	4	4	4	2	2	5	4	4	4	4	4	4	2	3
2021-03-31	54	2	4	2	5	medecin	10	6	2	2	2	2	2	2	2	1	1	1	1	1	1	1	0	1	0	1	0	0	1	0	0	2	4	1	5	5	5	5	5	2	5	5	5	5	5	5	2	1	1
2021-05-17	29	1	2	2	4	medecin	4	4	2		2	2	2	2	2	2	1	1	1	1	1	1	0	0	1	0	1	0	1	0	0	2	2	3	5	5	2	2	4	2	2	2	2	2	5	3	2	2	2
2021-04-05	27	1	2	2	4	medecin	8	7	2		2	2	1	2	2	2	2	2	1	1	2	1	0	0	1	0	1	0	1	0	0	5	4	4	2	5	5	3	1	1	2	4	1	1	5	5	2	1	1
2021-05-24	35	1	1	2	4	sagef	6	2	2		2	2	2	2	2	2	1	1	1	1	1	1	0	0	0	0	1	1	1	0	0	4	4	4	4	4	4	4	4	2	3	4	4	2	4	4	4	4	4
2021-05-04	30	1	2	2	4	infirmiere	1	1	1		2	2	2	2	2	2	1	1	1	1	1	1	0	1	0	1	0	0	0	1	0	4	4	4	5	4	4	4	5	1	4	5	4	4	3	3	4	1	2
2021-06-04	42	2	4	2	4	medecin	3	1	2	2	1	2	2	2	1	1	1	1	1	1	2	1	1	1	1	0	0	1	1	1	0	4	4	4	4	4	4	5	4	4	4	4	4	4	4	2	2	2	2
2021-04-30	35	2	1	2	5	medecin	6	3	2	2	1	1	2	2	2	2	2	1	2	1	1	1	0	0	0	0	1	1	0	0	1	2	4	4	4	4	4	4	4	4	4	4	2	4	4	4	2	2	2
2021-05-06	35	2	4	2	5	medecin	2	1	2	2	2	2	2	2	2	1	2	1	2	2	2	2	0	0	0	0	0	0	0	0	0	2	4	2	5	4	2	4	4	2	2	4	2	2	4	4	4	2	3
2021-04-14	30	1	2	2	4	medecin	1	1	1		2	2	2	2	2	2	2	2	1	2	2	2	0	0	0	0	0	0	0	0	0	4	2	4	2	4	2	2	2	1	2	2	1	1	3	3	3	2	2
2021-04-01	38	1	2	2	4	ats	1	1	2		2	2	2	2	2	2	1	1	1	1	1	2	0	0	0	0	0	0	0	0	0	4	1	4	5	5	5	1	2	2	1	5	2	1	5	5	5	1	1
2021-05-07	28	1	2	2	4	infirmiere	1	1	2		2	2	2	2	1	2	1	1	1	1	1	2	0	0	0	0	0	0	0	0	0	4	4	2	5	4	4	4	2	2	2	2	2	2	5	4	2	1	4
2021-05-22	30	1	2	2	4	infirmiere	1	1	2		2	2	2	2	2	2	1	1	1	1	2	2	0	0	0	0	0	0	0	0	0	4	4	2	4	5	5	2	3	2	2	2	1	1	3	4	2	1	4
2021-03-31	41	2	1	2	5	infirmiere	5	2	2	2	2	2	1	2	2	2	1	1	1	1	1	2	0	0	0	0	0	0	0	0	0	2	4	3	4	4	4	4	4	2	4	4	2	2	4	4	2	2	2
2021-03-30	28	1	1	2	5	medecin	2	2	2		2	2	2	2	2	2	1	1	1	1	2	2	0	0	0	0	0	0	0	0	0	2	2	2	4	4	4	2	3	2	2	3	2	2	4	4	4	2	2
2021-05-28	37	2	1	2	5	medecin	3	2	2	1	2	2	1	2	2	1	1	2	1	2	2	2	0	0	0	0	0	0	0	0	0	4	4	2	4	4	4	4	4	4	4	4	4	4	4	4	4	2	2
2021-05-28	36	2	1	2	5	infirmiere	4	2	2	2	2	2	1	2	2	1	1	2	1	2	2	2	0	0	0	0	0	0	0	0	0	4	4	4	4	4	4	4	4	4	4	4	4	2	4	4	2	2	2
2021-04-09	38	1	1	2	4	infirmiere	6	2	2		2	2	2	2	2	2	1	1	1	1	1	2	0	0	0	0	0	0	0	0	0	2	2	4	5	4	4	2	2	2	2	3	2	2	4	4	2	2	2
2021-06-03	38	1	1	2	4	medecin	8	2	2		2	2	2	2	1	2	1	1	1	2	2	2	0	0	0	0	0	0	0	0	0	2	2	2	4	4	4	4	2	2	2	2	2	2	4	4	2	2	2
2021-05-17	40	1	1	2	5	infirmiere	6	3	2		2	2	2	2	2	2	1	1	1	2	2	2	0	0	0	0	0	0	0	0	0	2	4	2	5	4	4	4	4	2	4	2	4	2	4	4	4	2	2
2021-05-27	27	2	2	2	5	medecin	5	3	2	2	2	2	2	2	1	2	1	2	1	2	2	2	0	0	0	0	0	0	0	0	0	2	4	4	4	4	4	4	2	2	2	4	2	2	4	4	4	2	2
2021-05-29	20	1	1	2	4	medecin	3	3	2		2	2	2	2	2	2	2	2	2	2	2	2	0	0	0	0	0	0	0	0	0	4	4	4	5	2	4	1	1	1	1	2	1	2	5	4	2	2	2
2021-06-04	29	2	3	2	5	medecin	4	4	2	2	2	2	1	2	2	2	1	1	1	2	2	2	0	0	0	0	0	0	0	0	0	2	4	4	2	4	4	4	4	2	4	4	2	2	4	4	4	2	2
2021-04-01	45	1	1	2	4	sagef	4	4	2		2	2	2	1	1	2	1	1	1	1	1	2	0	0	0	0	0	0	0	0	0	4	4	4	4	4	4	3	2	2	2	3	2	2	4	4	4	2	2
2021-05-05	31	1	2	2	4	infirmiere	9	4	1		2	2	2	2	1	2	1	1	1	2	2	2	0	0	0	0	0	0	0	0	0	4	2	4	4	4	4	4	4	4	4	2	2	2	4	4	2	2	2
2021-05-05	25	2	2	2	4	medecin	6	4	2	2	2	2	1	2	2	1	1	2	1	1	1	2	0	0	0	0	0	0	0	0	0	4	2	4	5	5	5	5	1	1	5	2	1	2	5	5	2	2	2
2021-06-04	27	2	1	2	5	medecin	4	4	2	2	2	2	2	2	1	2	1	1	1	1	1	2	0	0	0	0	0	0	0	0	0	2	2	2	4	4	4	2	4	2	3	4	2	2	4	4	2	2	2
2021-05-28	37	2	1	2	5	infirmiere	11	5	1	2	2	2	2	2	2	2	2	2	1	1	2	2	0	0	0	0	0	0	0	0	0	2	2	2	4	4	4	4	4	4	4	4	4	4	4	4	4	2	2
2021-05-23	25	1	2	2	4	medecin	9	5	2		2	2	1	2	1	2	1	1	1	1	1	2	0	0	0	0	0	0	0	0	0	4	4	4	4	4	4	4	4	2	2	4	2	2	4	4	4	2	2
2021-05-20	51	1	1	2	4	medecin	13	6	2		2	2	2	2	2	1	1	1	1	1	1	2	0	0	0	0	0	0	0	0	0	4	2	4	4	4	4	3	4	2	2	2	2	2	4	4	4	2	2
2021-04-01	44	2	1	2	5	para	12	5	2	2	2	2	2	2	1	2	1	1	1	1	1	1	0	0	0	0	1	0	0	0	0	2	5	4	5	5	5	5	2	4	5	4	5	4	5	5	3	4	5
2021-05-28	47	1	3	2	4	sagef	9	5	2		2	1	1	1	1	2	1	1	1	1	1	1	1	0	0	1	1	0	0	0	0	4	4	4	4	4	4	4	4	2	2	4	2	2	4	4	4	2	2
2021-06-29	42	1	1	2	4	infirmiere	4	4	2		2	2	2	2	2	2	1	1	1	1	1	1	1	0	0	1	1	1	0	0	0	4	4	4	5	4	4	4	4	4	4	4	4	4	4	5	2	2	2
2021-04-07	30	2	1	2	4	medecin	5	2	2	2	2	2	2	2	2	2	1	1	2	1	2	1	1	0	1	0	0	0	1	0	0	2	4	4	4	4	4	4	4	2	2	2	2	2	4	4	2	4	2
2021-03-31	43	2	1	2	4	medecin	10	5	2	2	2	2	2	2	2	2	1	1	1	1	1	2	0	0	0	0	0	0	0	0	0	2	2	2	4	4	4	3	3	3	3	4	3	2	4	4	2	2	2
2021-04-20	59	2	4	2	5	medecin	7	7	2	2	2	1	2	2	2	1	1	1	2	2	2	1	0	1	1	0	0	0	0	0	0	4	4	2	5	2	4	4	4	2	4	4	2	4	3	2	2	2	1
2021-04-30	29	1	2	2	4	sagef	1	1	2		2	2	2	2	1	2	1	1	1	1	2	1	0	0	1	1	0	0	0	0	0	4	4	2	5	4	2	2	2	2	2	4	1	1	5	5	2	2	4
2021-04-08	33	1	1	2	4	biologiste	8	5	2		2	2	2	2	1	2	1	1	2	1	1	1	0	0	1	1	0	0	0	0	0	4	2	2	4	4	4	5	5	1	2	4	1	1	5	2	4	2	1
2021-04-01	37	1	1	2	4	medecin	19	11	2		2	2	2	1	1	1	1	2	1	2	2	1	0	0	0	0	1	0	0	0	0	4	5	5	5	5	5	5	5	2	5	4	2	1	3	5	1	1	1
2021-04-02	30	2	1	2	5	sagef	8	4	2	2	2	2	2	2	2	2	1	1	1	2	2	1	1	0	1	0	1	0	0	0	0	5	4	5	5	4	4	5	5	4	5	4	4	4	5	4	4	1	5
2021-04-26	26	1	2	2	4	infirmiere	1	1	2		2	2	2	2	2	2	1	1	1	1	1	1	0	1	1	0	1	0	0	0	0	2	2	4	5	2	4	4	2	1	4	4	4	1	5	5	4	2	1
2021-04-08	38	1	1	2	4	medecin	3	3	2		2	2	2	2	2	2	1	1	1	1	2	1	0	1	1	0	1	0	0	0	0	4	5	4	5	2	5	5	2	2	5	4	5	3	5	5	1	4	5
2021-04-14	40	2	1	2	5	medecin	4	3	2	2	2	2	2	1	1	1	1	1	1	2	2	1	0	1	1	0	1	0	0	0	0	4	4	2	4	2	4	4	4	4	4	4	4	3	4	4	4	2	4
2021-04-19	46	1	1	2	4	biologiste	5	4	2		2	2	2	2	2	1	1	1	1	1	1	1	0	0	0	1	1	0	0	0	0	2	2	2	5	5	5	5	4	2	5	4	4	4	5	5	2	1	1
2021-07-01	42	1	3	2	4	medecin	3	2	2		1	1	2	2	2	2	1	1	1	1	1	1	1	0	1	0	0	1	0	0	0	4	4	4	4	4	4	4	2	2	2	1	1	1	4	4	4	1	2
2021-06-01	30	1	1	2	4	infirmiere	3	2	2		2	2	1	2	1	2	1	1	1	1	1	1	0	0	1	1	0	1	0	0	0	4	4	4	4	4	4	2	2	2	2	2	2	2	4	4	4	2	2
2021-05-18	35	1	1	2	4	medecin	10	6	2		2	1	2	2	1	2	1	1	1	1	2	1	0	0	0	1	1	1	0	0	0	2	5	3	4	4	2	2	4	2	2	4	2	2	5	4	2	2	2
2021-05-17	36	1	1	2	4	medecin	5	2	2		2	2	2	2	2	2	1	1	1	1	1	1	0	0	0	0	0	0	1	0	0	2	2	2	5	4	4	4	2	2	4	2	4	2	4	4	4	1	2
2021-04-14	42	1	1	2	5	medecin	5	2	2		2	2	2	2	2	1	1	1	1	1	1	1	0	1	0	1	0	0	1	0	0	4	2	4	5	5	5	5	4	4	2	3	4	4	5	5	1	1	2
2021-06-01	29	1	2	2	4	medecin	4	3	2		2	2	2	2	2	2	1	1	1	1	1	1	0	1	0	0	1	0	1	0	0	4	4	4	5	4	4	2	1	1	1	2	2	2	5	2	2	2	2
2021-04-02	36	1	2	2	4	medecin	13	8	2		2	2	2	2	2	1	1	1	2	2	2	1	0	0	0	0	0	0	0	1	0	4	5	4	5	5	4	1	5	1	4	3	4	4	3	2	4	2	5
2021-06-05	52	1	1	2	4	sagef	4	2	2		2	2	2	2	1	2	1	1	1	1	1	1	0	0	0	0	1	0	1	1	0	4	4	2	4	4	2	2	4	2	2	4	3	2	4	4	2	2	2
2021-06-30	42	2	1	2	4	biologiste	6	4	2	2	2	2	1	2	2	2	1	1	1	1	1	1	1	0	0	0	0	1	1	1	0	3	4	4	4	4	4	3	3	1	1	1	1	1	4	4	1	1	1
2021-05-17	34	1	1	2	4	infirmiere	6	2	2		2	2	2	2	1	2	2	1	1	1	2	2	0	0	0	0	0	0	0	0	0	2	2	2	5	5	5	5	5	2	4	4	4	2	4	5	4	2	4
2021-05-27	35	2	2	2	5	sagef	4	2	2	2	2	2	2	2	2	1	2	1	1	2	2	2	0	0	0	0	0	0	0	0	0	2	4	4	4	4	4	4	2	2	2	2	2	2	4	4	4	2	2
2021-04-20	32	2	1	2	5	medecin	10	3	2	1	2	2	2	2	2	2	2	2	2	2	2	2	0	0	0	0	0	0	0	0	0	2	2	2	5	4	4	5	4	2	2	4	2	2	5	4	2	2	5
2021-04-01	59	2	1	2	5	sagef	8	3	2	2	2	1	1	2	2	2	2	2	2	2	2	2	0	0	0	0	0	0	0	0	0	4	5	4	5	5	4	5	4	1	5	4	1	1	4	5	2	2	1
2021-04-26	41	2	3	2	5	sagef	6	3	2	2	2	2	2	2	2	2	1	1	1	1	1	2	0	0	0	0	0	0	0	0	0	4	4	4	5	4	4	2	4	4	4	4	4	4	4	5	2	2	2
2021-05-18	38	1	1	2	4	sagef	7	5	2		2	2	2	2	2	2	1	1	1	1	2	2	0	0	0	0	0	0	0	0	0	1	2	2	5	5	4	4	4	2	2	4	2	2	5	4	4	2	1
2021-04-19	40	2	1	2	5	medecin	10	5	2	2	1	1	2	2	2	2	1	1	1	2	1	2	0	0	0	0	0	0	0	0	0	4	4	4	4	4	4	4	4	2	2	3	2	2	4	4	2	2	2
2021-06-29	33	2	1	2	5	sagef	7	5	2	2	2	2	2	2	1	2	2	2	2	2	2	2	0	0	0	0	0	0	0	0	0	2	2	2	4	3	3	3	2	2	2	2	2	2	4	4	2	2	2
2021-04-26	37	2	1	2	5	para	16	6	2	2	2	2	2	2	2	2	1	1	1	1	2	2	0	0	0	0	0	0	0	0	0	4	4	3	5	5	5	4	2	1	4	4	2	2	5	5	4	2	4
2021-05-29	28	2	2	2	4	medecin	12	10	2	2	1	2	2	2	2	2	1	2	2	1	2	2	0	0	0	0	0	0	0	0	0	2	2	4	4	4	4	3	4	2	4	4	2	2	5	5	4	2	2
2021-03-30	32	2	1	2	5	labotech	12	4	2	2	2	2	2	2	2	1	1	1	1	2	2	1	0	0	0	1	0	0	1	0	0	4	4	2	3	4	3	4	4	4	4	4	3	2	4	4	2	2	4
2021-06-03	20	1	2	2	4	medecin	8	4	2		2	2	2	2	2	2	1	1	1	1	1	2	0	0	0	0	0	0	0	0	0	1	1	1	1	1	1	1	3	3	3	3	1	1	4	4	1	1	1
2021-04-14	40	1	4	2	4	medecin	1	1	2		2	2	1	2	1	2	2	2	1	1	1	1	0	0	0	0	1	0	0	0	0	4	2	4	4	5	5	2	4	2	1	3	1	2	4	4	4	2	4
2021-03-24	34	1	1	2	5	medecin	7	2	2		2	2	2	2	2	2	1	1	1	1	1	1	0	0	0	0	1	0	0	0	0	1	4	2	4	4	4	4	4	2	4	3	1	2	4	4	4	4	4
2021-05-04	35	1	1	2	4	infirmiere	3	2	2		2	2	2	2	1	2	1	1	1	1	1	1	0	0	0	0	1	0	0	0	0	2	2	1	5	5	5	4	4	1	4	4	4	4	5	4	2	2	2
2021-04-13	31	1	2	2	4	medecin	5	5	2		2	2	2	2	2	2	1	1	1	1	2	1	0	1	0	0	1	0	0	0	0	4	4	4	2	4	4	2	4	3	4	2	2	2	4	4	4	3	4
2021-04-22	30	2	1	2	4	medecin	8	3	2	2	2	2	2	2	2	2	1	1	1	1	1	1	0	0	1	0	1	0	0	0	0	4	4	4	5	5	4	3	2	1	4	4	1	1	5	5	4	2	2
2021-04-21	65	2	4	2	5	medecin	7	4	2	2	2	2	2	2	2	2	1	1	1	1	1	1	0	1	1	0	1	0	0	0	0	2	4	4	5	4	5	5	4	2	4	4	2	4	4	4	2	2	2
2021-05-21	33	1	1	2	4	medecin	3	2	2		2	2	2	2	2	2	1	1	1	1	1	1	1	1	0	0	0	1	0	0	0	4	4	4	4	4	4	4	4	2	4	4	4	4	4	4	4	4	4
2021-03-31	32	1	1	2	4	medecin	6	5	2		2	2	2	2	2	2	1	1	1	1	1	1	0	0	0	1	0	1	0	0	0	5	5	4	5	5	5	5	5	1	5	5	5	1	5	5	5	1	4
2021-06-05	37	1	1	2	4	infirmiere	5	2	2		2	2	1	2	2	2	1	1	1	1	1	1	0	0	0	0	1	1	0	0	0	4	4	4	2	4	4	1	2	1	1	1	2	2	5	3	4	2	2
2021-05-07	36	1	1	2	4	medecin	5	2	2		2	2	2	2	2	2	1	1	1	1	1	1	0	1	0	0	1	1	0	0	0	2	4	2	5	4	3	3	3	2	2	4	2	2	5	2	2	2	4
2021-04-18	39	1	1	2	4	infirmiere	8	4	2		2	2	2	2	2	2	1	1	1	2	2	1	0	1	0	0	1	1	0	0	0	5	4	5	5	5	4	5	4	2	4	4	2	2	4	4	2	2	2
2021-04-19	30	2	2	2	5	infirmiere	2	2	1	2	2	2	2	2	1	2	2	2	1	1	1	1	0	0	0	1	1	1	0	0	0	4	4	4	4	4	4	4	4	2	4	4	2	2	4	4	2	2	2
2021-05-06	34	1	2	2	4	medecin	2	2	2		2	2	2	2	1	2	1	1	1	1	2	1	0	0	0	0	0	0	1	0	0	4	4	4	5	4	4	5	4	2	2	2	4	2	5	4	2	2	2
2021-03-31	55	2	4	2	5	medecin	5	2	2	2	2	1	2	2	2	2	1	1	1	1	1	1	0	1	1	0	0	0	1	0	0	4	5	4	5	4	5	5	5	4	5	5	5	5	5	5	4	1	1
2021-04-26	63	2	4	2	4	medecin	7	2	2	2	2	2	2	1	1	2	1	1	1	1	1	1	0	0	0	1	0	0	1	0	0	2	2	2	5	5	5	5	4	4	4	4	1	2	3	4	2	2	1
2021-05-07	39	1	1	2	4	medecin	13	12	2		2	2	2	2	1	2	2	2	2	2	2	1	0	1	0	0	1	0	1	0	0	4	4	2	5	4	4	4	5	2	5	3	4	2	3	3	1	1	5
2021-06-03	36	1	1	2	4	medecin	3	2	2		2	2	2	2	2	2	1	1	1	1	1	1	0	0	1	0	1	0	1	0	0	4	4	4	4	4	4	4	2	2	2	2	2	2	4	4	2	2	2
2021-05-03	42	1	1	2	4	medecin	9	6	2		2	2	1	2	1	1	1	1	1	1	2	1	0	0	0	0	1	1	1	0	0	4	4	4	2	5	4	2	4	2	2	2	1	1	4	4	2	1	1
2021-05-26	25	2	2	2	4	medecin	1	1	1	2	2	2	1	2	1	2	1	1	1	1	1	1	0	0	0	0	1	1	0	1	0	4	4	4	3	5	2	1	2	1	1	1	1	1	3	3	1	1	1
2021-04-20	41	1	1	2	4	medecin	4	2	2		2	2	2	2	1	1	1	1	1	1	1	2	0	0	0	0	0	0	0	0	0	4	4	4	4	4	4	4	4	2	2	4	2	4	4	4	4	2	2
2021-03-30	35	1	1	2	4	medecin	3	2	2		2	2	2	2	1	2	1	2	1	2	2	2	0	0	0	0	0	0	0	0	0	1	1	1	5	5	4	2	4	1	2	2	4	1	5	4	5	2	1
2021-04-13	35	1	1	2	4	medecin	3	2	2		2	2	2	2	2	2	1	1	1	1	1	2	0	0	0	0	0	0	0	0	0	4	4	4	2	4	2	2	2	2	4	4	2	4	4	4	4	2	4
2021-06-05	35	2	2	2	4	medecin	9	3	2	2	2	2	2	2	1	2	1	1	1	1	1	2	0	0	0	0	0	0	0	0	0	4	4	4	4	4	4	4	4	2	2	4	2	2	4	4	4	2	2
2021-07-01	28	1	2	2	4	medecin	5	4	2		2	2	1	2	1	2	1	2	1	1	1	2	0	0	0	0	0	0	0	0	0	4	4	4	4	4	4	2	2	2	2	2	2	2	4	4	1	1	1
2021-07-01	40	1	1	2	4	medecin	12	4	2		2	2	1	2	1	1	1	1	1	1	2	2	0	0	0	0	0	0	0	0	0	4	4	4	4	4	4	4	4	2	4	3	2	2	4	4	2	2	2
2021-04-07	47	1	1	2	4	medecin	6	5	2		2	2	2	2	2	2	1	1	1	1	1	2	0	0	0	0	0	0	0	0	0	4	4	4	5	5	5	3	2	2	2	3	2	2	4	4	4	2	2
2021-05-06	42	2	4	2	4	infirmiere	5	5	2	2	2	1	2	2	2	2	1	1	1	1	1	2	0	0	0	0	0	0	0	0	0	2	2	2	4	4	4	4	3	4	5	4	4	4	4	4	4	2	2
2021-03-25	39	2	1	2	4	medecin	12	6	2	2	2	2	2	2	2	2	1	1	1	1	2	1	0	0	1	1	0	0	1	0	0	4	4	4	3	4	4	2	4	2	2	2	1	2	4	4	4	2	2
2021-06-01	58	1	1	2	4	medecin	10	5	2		2	2	2	2	2	2	1	2	2	2	2	2	0	0	0	0	0	0	0	0	0	2	4	4	4	4	4	4	4	2	2	4	2	2	4	4	4	2	3
2021-06-01	54	1	1	2	5	medecin	10	8	2		1	1	2	2	2	2	1	1	1	1	1	1	0	0	1	0	1	1	0	0	0	4	5	4	4	4	4	4	4	2	2	4	2	2	3	3	4	2	2
2021-05-27	33	2	1	2	4	medecin	5	2	2	2	2	2	1	2	1	2	2	1	1	2	2	2	0	0	0	0	0	0	0	0	0	2	4	3	4	4	3	4	4	4	4	4	2	2	4	4	4	2	2
2021-05-27	36	2	1	2	4	infirmiere	6	4	2	2	2	2	2	2	2	2	2	1	1	2	2	2	0	0	0	0	0	0	0	0	0	2	2	4	4	4	4	4	4	2	4	2	2	2	4	4	4	2	2
2021-03-24	55	2	1	2	4	infirmiere	6	4	2	2	2	1	1	2	1	2	1	1	1	1	1	1	0	0	0	0	1	0	0	0	0	4	4	4	5	5	5	5	5	4	5	3	1	1	3	4	2	4	4
2021-05-31	63	1	4	2	4	medecin	6	3	2		2	1	2	2	2	1	1	1	2	2	2	1	0	0	0	1	0	1	0	1	0	2	4	2	4	4	1	4	4	4	4	4	4	4	4	4	4	2	2
2021-05-31	55	2	1	2	5	medecin	5	1	2	2	2	1	2	2	2	1	1	2	2	2	2	2	0	0	0	0	0	0	0	0	0	2	2	2	5	4	4	3	4	2	2	2	2	2	4	4	4	2	2
2021-05-28	60	2	4	2	5	medecin	11	5	2	2	2	1	1	2	1	2	1	1	1	1	1	2	0	0	0	0	0	0	0	0	0	2	2	2	4	4	5	4	4	2	4	4	4	2	5	5	4	2	2
2021-04-14	45	1	1	2	4	medecin	12	8	2		2	2	2	2	1	2	2	1	1	1	2	1	0	0	0	0	1	0	0	0	0	5	4	4	5	5	4	4	2	2	2	2	2	2	4	4	2	2	2
2021-03-30	57	2	4	2	4	medecin	7	5	2	2	2	2	2	2	2	1	1	1	1	2	2	1	0	0	1	0	1	0	0	0	0	2	4	4	5	4	4	3	1	1	4	4	1	1	5	4	2	1	1
2021-04-28	31	1	2	2	4	medecin	5	3	1		2	2	2	2	2	2	1	1	1	1	2	1	0	1	1	0	1	0	0	0	0	4	4	4	4	4	4	4	2	2	2	4	2	2	4	4	2	2	3
2021-06-25	37	2	1	2	4	medecin	8	3	2	2	2	2	2	2	1	2	1	1	1	1	2	1	0	1	1	0	1	0	0	0	0	2	4	2	4	4	4	4	4	2	2	4	4	2	3	3	4	2	2
2021-04-22	52	1	1	2	4	medecin	15	10	2		2	1	2	2	2	1	1	1	1	1	1	1	0	1	0	1	1	0	0	0	0	4	4	4	5	5	4	5	4	4	5	4	4	4	5	5	2	2	5
2021-05-28	35	1	2	2	4	medecin	1	1	2		2	2	2	2	2	2	1	1	1	1	1	1	1	0	1	0	0	1	0	0	0	4	4	4	4	4	4	2	2	2	2	4	2	2	4	4	2	2	2
2021-06-05	63	1	1	2	4	labotech	13	7	2		2	1	2	2	2	1	1	1	1	1	1	1	0	1	1	0	0	1	0	0	0	4	4	4	5	4	4	5	4	2	5	4	2	1	5	4	4	1	2
2021-04-01	28	1	1	2	4	ats	2	2	2		2	2	2	2	2	2	2	2	2	2	2	1	0	0	1	1	0	1	0	0	0	4	3	4	4	4	3	4	2	2	2	2	2	1	4	4	2	1	2
2021-05-29	45	1	1	2	4	medecin	5	2	2		2	2	2	2	2	2	1	1	1	1	2	1	0	0	0	0	1	1	1	0	0	4	4	4	4	4	4	5	4	4	2	2	2	4	4	3	2	2	2
2021-06-28	26	1	2	2	5	medecin	2	2	2		2	2	2	2	2	1	1	1	1	1	1	1	1	1	1	0	1	1	1	0	1	2	3	3	4	4	4	2	2	2	3	2	2	2	4	4	4	2	2
2021-06-07	29	1	1	2	4	medecin	3	2	1		1	2	2	2	2	2	1	1	1	1	1	2	0	0	0	0	0	0	0	0	0	2	1	1	4	4	1	2	2	2	2	4	2	2	4	4	2	2	2
2021-05-28	41	1	1	2	4	para	6	2	2		2	2	1	2	1	2	1	1	1	1	1	2	0	0	0	0	0	0	0	0	0	1	1	1	1	1	1	1	1	1	1	1	1	1	4	4	4	4	4
2021-06-01	41	1	1	2	4	medecin	8	3	1		2	2	2	2	1	2	1	2	1	1	1	2	0	0	0	0	0	0	0	0	0	2	4	4	3	4	3	3	4	1	2	2	5	1	3	3	4	2	2
2021-04-19	45	1	1	2	4	medecin	10	7	2		2	1	2	2	2	2	1	1	1	1	2	2	0	0	0	0	0	0	0	0	0	4	4	4	4	4	4	4	2	2	2	2	2	2	2	4	2	2	2
2021-03-26	25	1	2	2	4	medecin	13	8	2		2	2	2	2	2	2	1	2	1	2	2	1	0	0	0	0	1	1	1	0	0	4	4	5	4	4	4	5	2	2	2	2	2	2	4	4	4	2	2
2021-04-13	34	1	1	2	4	medecin	4	2	2		2	2	2	2	2	2	1	1	1	1	1	1	0	0	1	0	0	0	0	0	0	2	2	2	4	4	4	2	4	2	2	2	2	2	4	4	2	2	4
2021-04-29	42	1	1	2	4	medecin	8	3	2		2	2	2	2	2	2	1	1	1	1	2	1	1	0	0	0	1	1	0	0	0	2	2	2	4	4	4	2	2	2	2	3	2	2	4	4	2	2	2
2021-04-17	35	1	1	2	4	medecin	3	2	2		2	2	1	2	2	2	1	1	1	1	1	2	0	0	0	0	0	0	0	0	0	4	4	3	4	4	4	3	4	2	2	4	2	2	4	4	4	2	2
2021-04-08	50	1	1	2	4	medecin	5	5	2		2	2	2	2	2	2	1	1	1	1	1	2	0	0	0	0	0	0	0	0	0	2	2	2	4	4	4	2	2	2	3	2	2	2	4	4	2	2	2
2021-06-04	49	1	1	2	4	medecin	6	2	2		2	2	1	2	2	2	1	1	1	1	1	1	0	1	0	1	1	0	0	0	0	4	4	4	4	4	4	4	4	2	4	4	4	4	4	4	4	2	2
2021-06-04	50	1	1	2	4	medecin	5	2	2		2	2	2	2	2	2	1	1	1	1	1	2	0	0	0	0	0	0	0	0	0	4	4	4	4	4	3	2	2	2	2	4	2	2	4	4	2	2	2
2021-04-01	27	2	2	2	4	medecin	8	8	2	2	2	2	1	2	1	1	1	2	1	1	1	1	0	0	1	1	0	1	0	0	0	5	5	4	4	4	3	4	4	3	4	3	2	2	3	3	2	2	1
2021-06-25	30	1	1	2	4	medecin	5	3	2		2	2	2	2	2	2	1	1	1	1	1	1	0	0	0	1	1	1	0	0	0	4	5	5	4	4	4	4	2	2	4	3	2	2	4	5	2	2	2
2021-06-30	29	2	2	2	4	medecin	9	6	2	2	2	2	2	2	2	2	1	1	1	1	1	1	0	1	0	0	0	1	1	0	0	4	4	4	4	4	4	4	4	4	4	4	2	2	4	4	2	2	2
2021-06-25	27	2	2	2	4	infirmiere	4	3	2	2	2	2	2	2	1	2	1	1	1	2	2	1	0	0	0	0	0	1	0	0	1	4	4	4	4	4	4	3	3	2	2	2	2	2	4	4	4	2	2
2021-07-01	30	1	1	2	4	infirmiere	3	2	2		2	2	2	2	2	2	1	1	1	2	2	2	0	0	0	0	0	0	0	0	0	2	2	2	2	2	2	2	2	2	2	2	2	2	4	4	2	2	2
2021-06-30	34	2	1	2	4	infirmiere	4	3	2	1	2	2	2	2	2	2	1	1	1	2	2	2	0	0	0	0	0	0	0	0	0	3	3	3	4	5	4	4	3	1	2	1	3	1	4	5	3	1	2
2021-06-04	30	2	2	2	5	infirmiere	2	2	1	2	2	2	2	2	1	2	1	1	1	2	2	1	0	0	0	1	1	0	1	0	0	4	4	4	4	4	4	2	4	2	4	4	2	2	4	4	2	2	2
2021-04-22	22	2	1	2	5	infirmiere	3	2	2	1	2	2	1	2	2	2	2	2	2	2	2	1	0	0	1	0	0	0	0	0	0	2	2	2	4	4	4	4	4	2	4	4	4	2	4	4	2	2	2
2021-04-23	21	1	2	2	5	infirmiere	7	4	2		2	2	2	2	2	2	2	1	2	1	1	1	0	0	1	0	0	0	0	0	0	2	4	2	4	4	4	4	2	2	4	4	4	2	4	4	2	2	2
2021-05-11	26	2	1	2	5	infirmiere	7	5	2	2	2	2	2	2	2	2	2	2	2	2	2	1	0	0	1	0	0	0	0	0	0	3	4	2	4	4	4	4	4	2	4	4	4	2	4	4	2	3	2
2021-04-14	24	2	1	2	5	infirmiere	4	2	2	1	2	2	1	2	2	2	2	2	2	2	2	1	0	0	0	1	0	0	0	0	0	4	4	2	4	4	4	4	2	2	2	4	2	2	4	4	2	2	2
2021-05-12	20	2	2	2	5	medecin	3	2	2	2	2	2	2	2	1	2	2	1	1	1	1	1	0	0	0	1	0	0	0	0	0	2	2	4	4	4	4	4	4	2	4	4	2	4	4	4	2	2	2
2021-04-22	23	1	2	2	5	infirmiere	7	4	2		2	2	2	2	2	2	2	1	1	2	2	1	0	0	0	1	0	0	0	0	0	4	2	4	4	4	4	4	2	2	2	2	2	2	4	4	2	2	2
2021-06-02	24	1	2	2	5	infirmiere	6	4	2		2	2	2	2	2	2	2	2	2	2	2	1	0	0	0	1	0	0	0	0	0	2	2	4	4	4	4	5	2	2	5	4	2	2	4	4	4	2	2
2021-04-13	54	1	1	2	4	medecin	6	4	2		2	2	1	2	2	2	1	1	1	1	2	1	0	0	0	1	0	0	0	0	0	4	3	3	4	4	4	4	4	3	2	4	2	2	4	5	2	2	2
2021-05-20	24	2	2	2	5	infirmiere	9	5	2	2	2	2	2	2	2	1	2	1	1	1	2	1	0	0	0	1	0	0	0	0	0	2	2	2	4	4	4	2	2	2	2	2	2	2	4	4	4	2	2
2021-04-28	20	2	2	2	5	medecin	6	2	2	2	2	2	2	2	2	2	1	1	1	1	1	1	0	1	0	1	0	0	0	0	0	1	2	2	4	4	4	4	4	4	4	4	4	4	4	4	2	2	2
2021-04-27	35	1	1	2	4	medecin	5	3	2		2	2	2	2	2	2	1	1	1	2	2	1	0	1	0	1	0	0	0	0	0	2	4	2	4	5	4	4	4	2	4	4	2	2	4	4	2	4	2
2021-05-31	32	1	1	2	5	medecin	10	5	2		2	2	2	2	2	2	1	2	2	2	2	1	0	1	0	1	0	0	0	0	0	4	4	4	4	5	4	4	2	2	4	4	2	2	4	4	4	2	1
2021-05-07	35	1	2	2	4	sagef	5	5	2		2	2	1	2	2	2	1	1	1	2	1	1	0	1	0	1	0	0	0	0	0	2	4	2	5	2	5	5	3	2	2	4	2	4	4	4	2	2	2
2021-04-23	40	1	1	2	4	infirmiere	6	2	2		2	2	2	2	1	2	1	1	1	1	1	1	0	0	1	1	0	0	0	0	0	4	4	4	5	5	5	5	4	2	4	4	2	2	4	4	4	2	2
2021-04-27	26	2	1	2	4	medecin	2	2	2	1	2	2	2	2	1	2	1	1	1	1	2	1	0	0	1	1	0	0	0	0	0	4	4	4	5	4	4	4	5	2	4	4	2	2	4	4	4	2	2
2021-04-21	23	2	2	2	5	sagef	4	2	2	2	2	2	1	2	1	1	1	1	1	2	2	1	0	0	1	1	0	0	0	0	0	2	2	2	4	2	5	5	4	2	4	4	4	4	4	4	2	2	2
2021-04-27	24	2	1	2	5	infirmiere	8	3	1	2	2	2	2	2	2	2	2	1	1	2	2	1	0	0	1	1	0	0	0	0	0	4	2	2	5	4	4	2	4	2	2	4	2	3	2	3	2	3	3
2021-04-23	30	1	1	2	4	medecin	5	4	2		2	2	2	2	2	2	1	1	1	1	2	1	0	0	1	1	0	0	0	0	0	4	4	4	4	4	4	5	5	2	4	2	2	2	5	4	2	2	2
2021-04-21	23	2	2	2	5	infirmiere	9	5	2	2	2	2	2	2	1	2	1	1	1	2	2	1	0	0	1	1	0	0	0	0	0	4	5	4	5	2	4	4	4	2	4	4	2	4	4	4	2	3	2
2021-05-27	25	2	1	2	5	infirmiere	4	2	1	2	2	2	1	2	2	2	2	1	2	2	2	1	0	1	1	1	0	0	0	0	0	2	4	2	5	4	4	5	4	2	2	4	4	4	5	4	2	2	2
2021-05-27	33	1	1	2	4	infirmiere	2	2	2		2	2	2	2	2	2	2	1	1	1	1	1	0	1	1	1	0	0	0	0	0	4	4	4	4	4	4	4	2	2	4	4	2	3	4	5	4	2	2
2021-04-23	31	2	1	2	5	infirmiere	4	3	2	2	2	2	2	2	2	2	1	1	1	1	1	1	0	1	1	1	0	0	0	0	0	4	4	4	2	2	2	2	2	2	4	4	2	2	4	4	4	3	3
2021-04-27	26	1	2	2	5	infirmiere	4	4	2		2	2	2	2	2	2	1	1	1	1	2	1	0	0	0	0	1	0	0	0	0	4	4	4	4	4	4	4	4	2	4	2	2	2	4	4	4	3	4
2021-04-15	25	2	2	2	5	medecin	5	4	2	2	2	2	2	2	2	2	2	1	1	2	2	1	0	0	0	0	1	0	0	0	0	4	2	3	4	5	3	5	5	3	4	4	2	4	2	3	2	4	2
2021-03-29	31	1	2	2	5	infirmiere	5	5	2		2	2	2	2	2	2	2	2	1	2	2	1	0	0	0	0	1	0	0	0	0	4	4	4	4	4	2	2	2	2	2	2	2	2	4	4	4	2	2
2021-05-24	20	2	2	2	5	sagef	8	5	2	2	2	2	2	2	2	1	2	2	1	2	2	1	0	0	0	0	1	0	0	0	0	2	1	2	4	4	4	5	2	2	4	4	4	4	5	5	4	1	4
2021-05-07	33	1	2	2	4	stagiaire	5	5	2		2	2	2	2	2	2	1	1	1	1	2	1	0	0	0	0	1	0	0	0	0	4	4	4	2	4	4	2	2	2	2	2	2	2	2	4	4	2	2
2021-04-28	24	2	2	2	5	stagiaire	6	6	2	2	2	2	2	1	2	2	2	1	1	1	1	1	0	0	0	0	1	0	0	0	0	2	4	4	5	4	4	5	4	2	4	4	2	4	4	4	2	2	4
2021-04-27	24	2	1	2	5	infirmiere	4	2	2	2	2	2	1	2	2	2	2	2	1	1	1	1	0	0	1	0	1	0	0	0	0	4	4	4	2	2	4	2	2	2	4	4	2	2	4	4	2	2	4
2021-06-11	29	1	1	2	4	sagef	2	2	1		2	2	2	2	1	1	2	1	2	1	1	1	0	0	1	0	1	0	0	0	0	1	1	1	4	4	4	4	4	2	2	4	2	2	4	4	2	2	3
2021-04-01	20	2	2	2	5	infirmiere	6	2	2	2	2	2	2	2	2	2	2	2	2	2	2	1	0	0	1	0	1	0	0	0	0	2	2	2	4	2	4	5	4	2	4	4	2	2	4	4	2	2	2
2021-04-28	20	2	2	2	5	infirmiere	4	3	2	2	2	2	2	2	2	2	1	1	1	2	2	1	0	0	1	0	1	0	0	0	0	4	2	2	4	4	4	4	4	2	4	4	2	2	4	4	2	2	4
2021-04-27	21	2	2	2	5	infirmiere	4	3	2	2	2	2	1	2	2	1	1	1	2	2	2	1	0	0	1	0	1	0	0	0	0	2	2	2	5	2	5	5	4	2	4	4	4	5	4	4	2	2	2
2021-04-23	21	2	1	2	5	infirmiere	6	4	2	2	2	2	1	2	2	2	2	1	2	2	2	1	0	0	1	0	1	0	0	0	0	4	2	4	4	4	4	3	2	2	2	2	2	2	2	4	2	2	3
2021-04-20	23	2	2	2	5	infirmiere	5	4	2	2	2	2	2	2	2	2	2	1	2	2	2	1	0	0	1	0	1	0	0	0	0	4	2	2	4	5	4	5	2	2	2	2	2	2	4	4	2	2	3
2021-05-21	26	2	2	2	5	infirmiere	7	4	2	2	2	2	2	2	2	2	2	2	1	2	2	1	0	0	1	0	1	0	0	0	0	2	4	2	4	4	4	5	4	3	4	4	4	4	4	4	2	4	2
2021-04-23	20	2	2	2	5	medecin	5	5	2	2	2	2	2	2	2	2	1	1	1	2	2	1	0	0	1	0	1	0	0	0	0	2	2	2	4	4	4	4	2	2	4	4	2	2	4	4	3	3	3
2021-05-07	21	2	1	2	5	medecin	8	6	1	2	2	2	2	2	2	2	2	2	2	2	2	1	0	0	1	0	1	0	0	0	0	3	2	3	4	4	4	4	4	2	2	2	4	4	4	4	2	2	3
2021-04-20	21	2	2	2	5	infirmiere	10	8	2	2	2	2	2	2	1	2	1	2	1	1	1	1	0	0	1	0	1	0	0	0	0	2	4	4	4	4	3	4	4	2	4	4	2	4	4	4	4	2	4
2021-04-14	47	1	1	2	4	medecin	8	3	2		2	1	2	2	2	2	1	1	1	1	1	1	1	0	1	0	1	0	0	0	0	4	4	4	4	4	5	5	4	3	4	4	2	4	4	4	2	3	2
2021-04-23	26	1	2	2	4	medecin	1	1	2		2	2	2	2	1	1	1	1	1	1	1	1	0	1	1	0	1	0	0	0	0	2	2	2	4	4	4	4	4	2	4	4	2	2	4	4	4	2	4
2021-04-16	28	2	1	2	4	medecin	3	2	2	2	2	2	1	1	2	1	1	1	1	1	2	1	0	1	1	0	1	0	0	0	0	2	2	2	4	2	4	5	4	2	5	2	2	2	4	4	4	2	2
2021-04-22	33	1	1	2	4	infirmiere	2	2	2		2	2	2	2	2	2	1	1	1	1	2	1	0	1	1	0	1	0	0	0	0	4	4	4	4	4	4	2	2	2	2	2	2	2	4	4	2	2	2
2021-04-15	30	1	1	2	4	infirmiere	3	2	2		2	2	2	2	2	2	2	1	1	2	2	1	0	1	1	0	1	0	0	0	0	4	4	4	2	2	3	4	2	2	4	2	2	2	4	4	2	2	2
2021-04-23	38	1	1	2	4	ats	4	2	1		2	2	2	2	2	2	1	1	1	1	1	1	0	1	1	0	1	0	0	0	0	4	4	4	4	4	4	4	4	2	2	4	2	2	4	4	2	2	2
2021-04-21	25	1	2	2	5	infirmiere	4	3	2		2	2	2	2	2	2	1	1	1	1	2	1	0	1	1	0	1	0	0	0	0	4	2	4	4	4	4	5	4	2	4	4	3	2	4	5	2	4	2
2021-04-20	18	2	2	2	5	infirmiere	7	3	2	2	2	2	2	2	2	2	2	2	1	2	2	1	0	1	1	0	1	0	0	0	0	2	2	2	4	2	4	5	4	2	4	4	2	2	4	4	4	2	4
2021-04-21	22	2	1	2	5	stagiaire	7	4	2	2	2	2	2	2	2	2	2	1	1	1	2	1	0	1	1	0	1	0	0	0	0	4	4	4	2	4	2	4	4	3	4	4	2	4	4	4	2	2	2
2021-05-06	27	1	2	2	5	medecin	5	5	2		2	2	2	2	2	2	2	1	2	2	2	1	0	1	1	0	1	0	0	0	0	2	4	4	4	2	4	2	2	2	2	2	2	2	4	4	2	2	3
2021-04-22	32	2	2	2	5	medecin	15	10	2	2	2	2	2	2	1	1	2	2	1	1	1	1	0	1	1	0	1	0	0	0	0	5	4	4	5	4	3	2	4	2	4	4	2	4	4	5	2	2	2
2021-04-01	22	2	2	2	5	infirmiere	15	10	2	2	2	2	2	2	1	2	2	1	1	1	1	1	0	1	1	0	1	0	0	0	0	4	4	4	3	4	4	4	5	2	4	4	2	3	3	3	2	2	2
2021-04-13	30	1	2	2	4	medecin	20	15	2		2	2	2	2	2	2	1	1	1	1	1	1	0	1	1	0	1	0	0	0	0	4	4	2	2	4	4	2	2	3	2	2	2	2	4	4	4	2	4
2021-05-05	27	1	2	2	4	medecin	1	1	2		2	2	2	2	2	2	1	1	1	1	1	1	0	0	0	1	1	0	0	0	0	4	2	4	4	4	4	4	2	2	2	2	2	2	4	4	2	2	2
2021-04-27	22	2	1	2	5	medecin	2	2	2	2	2	2	2	2	2	1	1	1	1	2	2	1	0	0	0	1	1	0	0	0	0	4	4	4	4	2	4	2	4	2	2	2	2	4	4	4	4	2	2
2021-04-16	27	1	2	2	4	sagef	2	2	2		2	2	2	2	2	2	1	1	1	1	1	1	0	0	0	1	1	0	0	0	0	2	4	4	2	4	3	2	2	2	2	2	2	2	4	4	4	2	2
2021-04-23	28	1	1	2	4	infirmiere	2	2	2		2	2	2	2	2	2	1	1	1	1	1	1	0	0	0	1	1	0	0	0	0	4	4	2	4	4	4	2	2	2	2	4	2	2	4	4	4	4	4
2021-04-30	30	1	2	2	4	infirmiere	2	2	2		2	2	1	2	2	1	1	1	1	1	1	1	0	0	0	1	1	0	0	0	0	4	4	4	4	4	4	4	4	2	4	4	2	2	4	4	2	3	4
2021-04-21	25	2	1	2	5	infirmiere	3	2	2	2	2	2	2	2	2	2	2	1	1	2	2	1	0	0	0	1	1	0	0	0	0	2	2	2	4	2	2	3	2	2	4	2	4	2	4	4	2	3	2
2021-04-22	23	1	2	2	5	infirmiere	7	3	2		2	2	2	2	2	2	2	1	1	2	2	1	0	0	0	1	1	0	0	0	0	4	4	4	4	4	4	4	4	2	4	4	2	2	4	5	2	4	2
2021-06-02	24	1	2	2	5	infirmiere	4	3	2		2	2	2	2	2	2	1	1	1	1	2	1	0	0	0	1	1	0	0	0	0	4	4	4	4	4	4	2	5	2	2	4	2	2	4	4	2	2	2
2021-04-22	23	2	2	2	5	medecin	5	4	2	2	2	2	2	2	2	2	2	2	1	1	2	1	0	0	0	1	1	0	0	0	0	4	4	4	4	4	4	4	4	2	4	4	2	2	4	5	2	2	2
2021-05-11	24	2	2	2	5	infirmiere	6	4	2	2	2	2	2	2	2	2	2	2	2	2	2	1	0	0	0	1	1	0	0	0	0	3	2	4	4	4	4	2	2	2	2	4	2	2	4	4	2	2	2
2021-05-18	23	1	1	2	5	medecin	5	4	2		2	2	2	2	2	1	2	1	1	1	2	1	0	0	0	1	1	0	0	0	0	4	4	4	2	4	2	2	2	2	4	4	2	2	4	3	4	2	2
2021-04-27	36	2	1	2	4	medecin	5	4	2	2	2	2	2	2	1	2	1	1	1	1	1	1	0	0	0	1	1	0	0	0	0	3	4	4	4	4	4	4	4	2	4	4	2	2	4	4	2	2	4
2021-04-15	20	2	2	2	5	sagef	8	6	2	2	2	2	2	2	2	2	1	1	1	1	2	1	0	0	0	1	1	0	0	0	0	2	2	2	4	2	4	4	4	2	4	2	4	4	4	4	4	4	2
2021-04-28	26	1	2	2	4	medecin	6	6	2		2	2	2	2	1	2	1	1	1	1	2	1	0	0	0	1	1	0	0	0	0	4	4	4	2	4	2	2	2	2	2	2	2	2	4	4	2	2	2
2021-04-21	35	1	1	2	4	infirmiere	7	7	2		2	2	1	2	2	2	1	1	1	1	2	1	0	0	0	1	1	0	0	0	0	4	4	4	4	4	3	2	4	2	4	4	2	2	4	4	3	2	2
2021-06-04	24	2	2	2	5	infirmiere	20	13	2	2	2	2	1	2	2	2	1	1	1	1	1	1	1	0	0	1	1	0	0	0	0	4	4	2	4	4	4	3	4	2	2	2	2	2	4	4	2	2	2
2021-05-28	30	1	2	2	4	infirmiere	1	1	2		2	2	2	2	2	2	1	1	1	1	1	1	0	1	0	1	1	0	0	0	0	4	4	5	4	4	4	2	4	1	2	1	1	1	4	4	1	2	2
2021-04-15	20	2	2	2	5	infirmiere	3	2	2	2	2	2	2	2	1	2	1	1	2	2	2	1	0	1	0	1	1	0	0	0	0	4	4	4	4	4	4	4	4	3	2	2	2	2	4	4	2	2	2
2021-06-02	26	2	1	2	5	medecin	3	3	2	2	2	2	2	2	2	2	2	1	2	1	1	1	0	1	0	1	1	0	0	0	0	4	2	4	4	4	4	2	2	2	2	4	2	2	4	5	4	2	4
2021-06-02	25	2	1	2	5	infirmiere	5	3	2	2	2	2	1	2	1	2	1	1	1	2	2	1	0	1	0	1	1	0	0	0	0	2	4	4	4	4	4	2	4	2	4	4	2	2	4	4	2	4	2
2021-06-02	24	2	2	2	5	medecin	3	3	1	2	2	2	2	2	2	2	1	2	2	2	2	1	0	1	0	1	1	0	0	0	0	2	2	2	4	3	4	4	4	1	3	2	2	2	4	4	2	1	2
2021-05-31	25	2	2	2	4	infirmiere	4	3	2	2	2	2	1	2	2	2	1	1	1	1	1	1	0	1	0	1	1	0	0	0	0	2	4	4	5	4	4	2	2	1	1	1	1	1	4	5	1	2	1
2021-05-07	20	2	2	2	5	infirmiere	5	4	1	2	2	2	2	2	2	2	2	1	1	1	1	1	0	1	0	1	1	0	0	0	0	4	2	4	4	4	4	5	4	2	4	4	2	2	4	5	2	2	2
2021-05-31	30	1	1	2	4	medecin	5	5	2		2	2	2	2	2	2	1	1	1	1	2	1	0	1	0	1	1	0	0	0	0	4	4	4	4	4	4	4	4	2	4	2	2	2	4	4	4	4	2
2021-05-27	25	1	2	2	5	medecin	7	7	2		2	2	2	2	2	2	2	2	1	2	2	1	0	1	0	1	1	0	0	0	0	4	4	4	5	4	4	2	4	2	4	4	2	2	4	4	2	2	1
2021-06-02	26	1	2	2	5	infirmiere	16	8	2		2	2	2	2	2	2	2	2	1	1	1	1	0	1	0	1	1	0	0	0	0	2	4	4	4	5	4	2	4	4	2	4	2	2	4	4	4	2	2
2021-04-30	29	1	2	2	4	infirmiere	12	9	2		2	2	2	2	2	2	1	1	1	1	2	1	0	1	0	1	1	0	0	0	0	2	2	2	4	4	4	2	4	2	2	2	2	2	2	4	2	4	4
2021-04-20	25	1	2	2	4	medecin	20	10	2		2	2	2	2	2	2	2	1	1	1	2	1	0	1	0	1	1	0	0	0	0	4	2	4	4	4	4	5	4	2	4	5	2	2	4	4	2	3	4
2021-04-23	27	1	2	2	5	infirmiere	2	2	2		2	2	2	2	2	2	2	1	2	2	2	1	0	0	1	1	1	0	0	0	0	4	2	2	5	4	4	4	4	2	4	4	2	2	4	4	2	2	4
2021-03-31	25	1	2	2	5	medecin	5	3	2		2	2	2	2	2	2	1	2	2	2	2	1	0	0	1	1	1	0	0	0	0	2	4	4	4	2	3	2	4	2	2	4	2	2	4	4	4	3	2
2021-04-30	31	1	2	2	4	medecin	3	3	1		2	2	2	2	2	2	1	1	1	1	2	1	0	0	1	1	1	0	0	0	0	4	4	4	4	2	4	4	4	2	4	4	2	2	4	4	2	2	4
2021-05-05	26	2	2	2	5	medecin	5	4	2	2	2	2	2	2	2	2	2	1	1	2	2	1	0	0	1	1	1	0	0	0	0	2	2	4	4	4	4	4	4	2	4	4	2	4	4	4	2	2	2
2021-04-22	28	1	1	2	4	medecin	6	4	2		2	2	2	2	2	2	1	1	1	1	1	1	0	1	1	1	1	0	0	0	0	4	4	4	5	4	4	2	2	2	2	2	2	2	4	4	4	2	2
2021-04-09	29	1	2	2	4	infirmiere	5	3	2		2	2	2	2	2	2	1	1	1	1	1	1	0	0	0	0	0	1	0	0	0	4	4	4	4	4	4	5	4	2	2	2	2	2	2	2	4	2	4
2021-06-09	28	1	2	2	4	medecin	1	1	2		2	2	2	2	2	2	2	2	1	1	2	1	0	1	0	1	0	1	0	0	0	4	4	4	4	4	4	4	2	2	4	4	2	2	5	4	2	3	4
2021-05-31	32	2	4	2	4	medecin	3	2	2	2	2	2	2	2	2	2	1	1	1	1	2	1	0	1	0	1	0	1	0	0	0	2	2	2	4	4	2	4	2	2	4	2	1	1	5	4	1	1	1
2021-06-02	27	1	2	2	5	medecin	5	3	2		2	2	2	2	2	2	2	1	1	2	2	1	0	1	0	1	0	1	0	0	0	2	2	2	5	4	4	4	4	2	2	2	2	2	4	4	2	2	2
2021-05-20	26	1	2	2	4	medecin	6	4	2		2	2	2	2	1	2	1	1	1	1	1	1	0	0	1	1	0	1	0	0	0	2	4	4	4	4	4	2	4	2	2	4	2	2	3	3	2	2	3
2021-05-05	27	1	2	2	4	sagef	1	1	2		2	2	2	2	2	2	1	1	1	1	1	1	0	0	0	0	1	1	0	0	0	4	4	4	4	2	3	2	4	2	2	4	2	4	4	4	2	2	2
2021-04-01	32	1	1	2	4	infirmiere	4	2	2		2	2	1	1	2	2	2	1	1	2	2	1	0	0	0	0	1	1	0	0	0	4	4	4	4	4	2	3	2	2	4	2	2	2	4	4	2	2	2
2021-04-22	27	1	2	2	4	infirmiere	2	2	2		2	2	2	2	1	2	1	1	1	1	1	1	0	0	0	0	1	1	0	0	0	4	2	4	4	4	4	2	2	2	2	4	2	2	4	4	2	3	4
2021-04-02	30	2	1	2	4	medecin	7	2	2	2	2	2	2	2	2	2	1	1	1	2	2	1	0	1	0	0	1	1	0	0	0	1	1	2	5	4	4	2	2	2	2	4	2	2	4	4	2	2	2
2021-05-21	23	2	2	2	5	stagiaire	5	3	2	2	2	2	2	2	1	2	1	2	1	1	2	1	0	0	1	0	1	1	0	0	0	4	4	4	4	3	4	4	4	2	4	4	4	2	4	4	4	2	4
2021-05-20	25	2	2	2	5	medecin	5	3	2	2	2	2	2	2	2	1	2	1	2	2	2	1	0	0	1	0	1	1	0	0	0	2	2	2	4	4	4	4	2	2	4	4	2	2	5	4	2	4	2
2021-03-25	30	2	2	2	4	medecin	6	5	2	2	2	2	2	2	1	2	1	1	1	1	1	1	0	0	1	0	1	1	0	0	0	2	4	4	5	4	4	4	3	2	4	3	2	2	4	4	4	2	3
2021-05-24	24	2	2	2	4	medecin	8	5	2	2	2	2	2	2	2	2	1	1	1	1	2	1	0	0	1	0	1	1	0	0	0	3	2	4	5	5	4	4	4	3	4	4	2	3	4	4	1	2	3
2021-05-24	28	2	2	2	4	medecin	2	2	2	2	2	2	1	2	2	2	1	1	1	1	1	1	0	0	0	1	1	1	0	0	0	4	5	4	4	4	4	4	4	2	2	4	2	1	4	4	2	4	4
2021-05-21	25	1	2	2	4	medecin	5	4	2		2	2	2	2	2	2	1	1	1	1	1	1	0	0	0	1	1	1	0	0	0	4	4	4	4	4	4	2	2	2	2	2	2	2	4	4	2	2	2
2021-05-31	27	2	2	2	4	sagef	4	4	2	2	2	2	2	2	2	2	2	1	1	1	1	1	0	0	0	1	1	1	0	0	0	2	2	4	2	4	2	2	2	1	2	2	1	1	2	4	4	3	2
2021-04-28	26	1	2	2	4	infirmiere	7	5	2		2	2	2	2	1	2	1	1	1	1	2	1	0	0	0	1	1	1	0	0	0	2	4	2	4	4	4	4	4	2	4	4	4	4	4	4	2	2	2
2021-05-11	27	1	2	2	4	sagef	2	2	2		2	2	2	1	2	2	1	1	1	1	1	1	0	1	1	1	1	1	0	0	0	4	2	4	2	4	2	2	2	2	2	2	2	2	4	4	2	2	2
2021-04-27	25	2	1	2	5	infirmiere	5	2	2	1	2	2	2	2	2	2	2	2	2	2	2	1	0	0	0	0	0	0	1	0	0	2	2	2	4	4	4	2	4	2	2	4	4	2	4	4	2	3	2
2021-05-18	24	1	1	2	5	infirmiere	6	4	2		2	2	1	2	1	2	2	2	1	2	2	1	0	0	1	0	0	0	1	0	0	4	4	4	4	4	4	5	2	2	4	4	2	2	2	2	2	2	2
2021-04-01	46	2	1	2	5	sagef	6	4	2	2	2	2	2	2	2	2	2	1	1	2	2	1	0	0	1	0	0	0	1	0	0	2	4	4	4	4	4	4	2	2	4	2	2	2	4	4	2	2	2
2021-05-20	21	2	2	2	5	infirmiere	4	2	2	2	2	2	2	2	2	1	2	2	2	2	2	1	0	0	0	1	0	0	1	0	0	2	4	2	2	4	4	2	4	2	2	2	2	2	3	3	2	3	2
2021-05-27	24	2	1	2	5	medecin	3	3	2	2	2	2	2	2	2	2	1	1	1	2	2	1	0	0	0	1	0	0	1	0	0	2	5	4	4	4	4	5	4	1	2	5	2	2	4	4	4	1	2
2021-03-30	40	2	1	2	5	infirmiere	13	9	2	2	2	2	2	2	2	1	2	1	1	1	1	1	0	1	0	1	0	0	1	0	0	4	4	4	3	2	4	3	2	2	2	2	2	2	4	4	3	4	2
2021-04-13	22	2	2	2	5	stagiaire	6	3	2	2	2	2	2	2	2	2	1	1	1	1	1	1	0	0	1	1	0	0	1	0	0	4	4	4	5	4	4	4	3	2	4	4	2	2	4	4	4	2	4
2021-05-06	26	2	2	2	4	infirmiere	1	1	1	2	2	2	2	2	2	2	1	1	1	1	2	1	0	0	0	0	1	0	1	0	0	2	4	4	2	4	2	2	2	2	2	4	2	2	4	2	2	3	4
2021-04-13	19	2	2	2	5	infirmiere	6	5	2	2	2	2	2	1	2	2	1	1	1	1	1	1	0	0	0	0	1	0	1	0	0	4	4	4	4	4	4	4	4	3	4	4	2	2	4	4	4	2	2
2021-06-07	24	1	2	2	4	infirmiere	5	5	1		2	2	2	2	1	1	1	1	1	1	1	1	0	0	0	0	1	0	1	0	0	4	4	4	4	4	2	2	2	2	2	2	2	2	4	4	2	2	2
2021-05-05	20	2	2	2	5	medecin	11	2	2	2	2	2	2	1	1	2	2	2	2	2	2	1	0	1	0	0	1	0	1	0	0	4	4	4	4	2	4	2	3	2	4	4	4	4	4	4	2	4	2
2021-05-11	23	2	1	2	5	medecin	3	2	2	2	2	2	2	2	2	1	1	2	1	1	1	1	0	1	0	0	1	0	1	0	0	2	4	4	4	4	4	2	2	2	2	2	2	2	4	4	2	3	2
2021-04-01	27	2	1	2	5	infirmiere	7	4	2	2	2	2	2	2	2	2	1	1	1	1	1	1	0	1	0	0	1	0	1	0	0	2	4	2	4	4	4	4	4	3	4	2	2	2	4	4	2	2	2
2021-04-06	30	1	2	2	4	medecin	12	8	2		2	2	1	2	1	2	1	1	1	1	2	1	0	1	0	0	1	0	1	0	0	4	4	4	4	4	4	3	4	4	4	4	2	2	4	4	2	2	4
2021-04-28	30	1	2	2	4	infirmiere	12	11	2		2	2	1	2	1	2	1	1	1	1	1	1	0	1	0	0	1	0	1	0	0	2	2	4	4	4	4	4	2	2	4	4	2	2	4	4	2	2	2
2021-05-20	20	2	2	2	5	stagiaire	5	3	2	2	2	2	1	2	2	2	2	2	1	2	2	1	0	0	0	1	1	0	1	0	0	2	2	4	4	4	4	2	4	2	4	4	2	2	4	3	2	2	2
2021-06-09	29	1	2	2	4	medecin	4	3	2		2	2	2	2	2	2	1	1	1	1	1	1	0	0	0	1	1	0	1	0	0	2	2	2	5	2	2	2	4	2	1	2	2	2	5	4	2	2	2
2021-05-24	26	1	2	2	5	infirmiere	9	5	2		2	2	2	2	2	2	1	1	1	1	1	1	0	0	0	1	1	0	1	0	0	4	5	4	4	2	4	5	4	2	5	4	2	4	4	5	2	2	3
2021-06-08	28	2	2	2	4	medecin	5	5	2	2	2	2	2	2	2	2	1	1	1	1	1	1	0	0	0	1	1	0	1	0	0	4	2	4	4	4	4	2	2	2	2	2	2	2	4	4	4	2	3
2021-06-02	26	2	2	2	4	medecin	6	6	2	2	2	2	2	2	2	2	1	2	1	2	2	1	0	0	0	1	1	0	1	0	0	2	2	2	4	4	2	2	2	1	1	1	2	1	4	4	2	1	2
2021-05-05	22	2	2	2	5	infirmiere	14	9	2	2	2	2	2	2	2	2	2	2	1	2	2	1	0	0	0	1	1	0	1	0	0	2	2	2	4	4	4	4	4	2	2	4	2	2	4	4	2	3	2
2021-05-27	27	1	2	2	4	medecin	5	5	2		2	2	2	2	2	2	1	1	1	1	1	1	0	1	0	1	1	0	1	0	0	4	5	4	2	4	4	1	5	2	1	2	2	2	4	5	4	1	2
2021-05-28	23	2	2	2	4	medecin	5	3	2	2	2	2	2	2	1	2	1	1	2	1	2	1	0	0	0	1	0	1	1	0	0	4	5	4	4	5	4	4	4	2	4	2	1	2	5	4	2	2	2
2021-05-06	23	1	2	2	5	medecin	12	6	2		2	2	2	2	2	2	2	1	1	1	2	1	0	1	0	0	0	1	1	1	0	4	4	4	4	4	4	4	4	2	4	2	2	2	4	5	4	4	4
2021-05-07	28	1	2	2	4	medecin	3	3	2		2	2	2	2	2	2	1	1	1	1	2	1	0	0	0	0	0	0	0	0	1	4	2	2	4	4	4	2	2	2	4	2	2	2	3	3	2	2	2
2021-05-31	27	1	2	2	4	medecin	2	2	1		2	2	2	2	2	2	1	2	1	1	1	1	0	0	0	1	0	0	0	0	1	4	2	4	2	4	4	1	2	1	2	1	1	1	4	3	2	2	2
2021-06-01	28	1	1	2	4	medecin	3	2	2		2	2	2	2	1	1	1	2	1	1	1	1	0	1	0	1	0	0	0	0	1	4	4	4	4	4	4	2	4	2	2	2	1	2	4	5	2	4	2
2021-05-24	32	1	2	2	4	medecin	6	6	2		2	2	2	2	1	2	1	1	1	1	1	1	0	0	1	1	0	0	0	0	1	4	5	4	4	4	4	2	1	1	1	2	1	1	4	2	4	2	2
2021-06-08	29	1	2	2	4	stagiaire	1	1	2		2	2	2	2	1	2	2	1	1	2	1	1	0	0	0	0	1	0	0	0	1	4	4	4	4	4	4	4	4	2	4	4	2	2	4	4	2	4	2
2021-05-07	25	2	2	2	4	stagiaire	6	5	2	2	2	2	1	2	1	2	2	1	1	1	1	1	0	1	1	0	1	0	0	0	1	4	4	4	2	4	2	2	2	2	2	4	4	2	4	4	2	2	2
2021-06-01	29	2	2	2	4	medecin	1	1	2	2	2	2	2	2	2	2	1	1	1	1	2	1	0	0	0	1	1	0	0	0	1	4	4	4	4	5	4	2	2	1	1	1	1	1	1	1	2	3	3
2021-06-09	25	1	2	2	4	infirmiere	3	1	2		2	2	2	2	2	2	2	2	1	2	2	1	0	0	0	1	1	0	0	0	1	3	2	2	4	2	4	4	4	2	2	2	2	2	2	4	2	2	2
2021-06-01	23	1	2	2	4	medecin	3	3	2		2	2	1	2	2	2	1	1	1	1	1	1	0	0	0	1	1	0	0	0	1	5	5	4	4	4	4	4	4	2	5	4	1	1	5	5	1	1	2
2021-05-21	29	1	2	2	4	medecin	4	4	2		2	2	2	2	2	2	1	2	1	1	1	1	0	0	0	1	1	0	0	0	1	4	4	4	4	4	4	1	2	2	4	2	2	2	4	4	2	1	1
2021-05-27	28	1	2	2	5	medecin	8	5	2		2	2	2	2	2	2	2	2	1	1	1	1	0	0	0	1	1	0	0	0	1	2	4	2	5	4	4	4	4	2	4	1	1	2	5	4	4	1	2
2021-04-28	27	1	2	2	4	medecin	1	1	2		2	2	2	2	2	2	1	1	1	1	1	1	0	1	0	1	1	0	0	0	1	4	4	4	4	4	4	2	2	2	4	2	2	2	4	4	2	3	2
2021-06-01	25	1	2	2	4	medecin	3	3	2		2	2	2	2	1	2	1	1	1	1	2	1	0	1	0	1	1	0	0	0	1	4	2	4	5	4	4	2	2	2	2	2	2	2	4	5	1	2	2
2021-04-14	28	1	2	2	4	medecin	4	3	2		2	2	2	2	1	2	1	1	1	1	1	1	0	0	0	0	0	1	0	0	1	4	4	4	4	4	2	2	2	2	2	2	2	2	5	4	4	2	4
2021-05-21	26	1	2	2	4	medecin	8	8	2		2	2	2	2	2	2	1	1	1	1	1	1	0	1	0	0	0	1	0	0	1	4	4	4	4	4	2	2	2	2	2	4	2	2	4	4	2	3	2
2021-05-26	31	1	1	2	4	medecin	3	2	2		2	2	2	2	2	2	1	1	1	1	1	1	0	0	0	1	0	1	0	0	1	4	4	4	4	5	4	5	4	2	2	4	1	2	4	4	1	1	2
2021-06-08	33	1	1	2	4	medecin	5	2	2		2	2	2	2	2	1	1	2	1	1	2	1	0	0	0	0	1	1	0	0	1	4	4	4	2	4	4	2	2	2	1	4	1	2	4	5	4	2	2
2021-05-31	28	1	2	2	4	medecin	4	4	2		2	2	2	2	1	2	1	1	1	1	1	1	0	0	0	0	1	1	0	0	1	4	4	4	4	4	4	5	4	2	4	4	2	2	4	5	4	2	2
2021-04-15	30	2	2	2	4	medecin	6	5	2	2	2	2	2	2	1	2	1	1	1	1	1	1	0	0	0	0	1	1	0	0	1	2	4	4	3	4	3	3	2	2	4	4	2	2	2	4	4	2	2
2021-06-02	24	2	2	2	4	stagiaire	3	3	2	2	2	2	2	2	2	2	1	1	1	1	2	1	0	0	0	1	0	0	1	0	1	2	4	2	5	4	4	5	4	1	4	2	1	2	4	4	4	3	3
2021-05-27	27	2	2	2	4	infirmiere	10	10	1	2	2	2	2	2	2	2	1	2	1	1	1	1	0	0	0	1	0	0	1	0	1	4	4	4	4	4	4	2	2	1	1	1	1	1	3	4	4	1	4
2021-06-08	29	1	2	2	4	infirmiere	10	7	2		2	2	2	2	1	2	2	2	1	1	2	1	0	1	0	1	0	0	1	0	1	4	4	4	4	4	2	2	2	2	2	4	1	2	4	4	2	4	2
2021-06-07	20	1	2	2	4	medecin	1	1	2		2	2	1	2	2	2	1	1	1	1	1	1	1	1	1	1	1	1	1	1	1	5	1	1	5	5	5	5	5	5	5	4	5	1	5	5	3	1	1
2021-03-30	45	2	3	2	5	medecin	2	1	2	2	2	1	1	2	2	2	1	1	2	2	2	2	0	0	0	0	0	0	0	0	0	4	4	3	4	3	4	4	4	2	4	3	2	2	4	4	3	4	2
2021-05-07	20	2	2	2	5	biolog	9	1	2	2	2	2	2	2	2	1	2	2	1	2	2	2	0	0	0	0	0	0	0	0	0	2	2	4	4	4	4	4	4	2	2	3	4	4	4	4	2	2	2
2021-04-06	31	1	2	2	4	infirmiere	1	1	2		2	2	2	2	2	2	1	1	1	1	1	2	0	0	0	0	0	0	0	0	0	2	4	4	2	2	4	2	2	2	4	3	2	2	4	4	2	2	2
2021-04-13	27	2	2	2	4	infirmiere	1	1	1	2	2	2	2	2	1	2	1	1	2	1	1	2	0	0	0	0	0	0	0	0	0	4	4	4	4	4	2	2	2	2	2	2	2	2	2	4	4	2	2
2021-03-31	40	2	1	2	4	infirmiere	6	2	2	2	2	2	2	2	1	1	1	1	2	2	2	2	0	0	0	0	0	0	0	0	0	4	4	4	5	3	4	4	4	2	4	3	4	2	4	4	2	2	2
2021-04-03	25	2	1	2	5	infirmiere	6	2	2	2	2	2	2	2	2	2	1	1	1	2	2	2	0	0	0	0	0	0	0	0	0	1	1	3	4	4	4	4	4	2	4	4	2	1	4	4	2	2	2
2021-04-08	22	2	1	2	5	infirmiere	2	2	1	1	2	2	2	2	2	2	1	1	1	1	1	2	0	0	0	0	0	0	0	0	0	2	2	2	5	4	4	4	2	2	2	2	2	2	4	4	4	2	2
2021-04-13	28	2	1	2	5	infirmiere	4	2	2	2	2	2	1	1	1	2	2	1	2	2	2	2	0	0	0	0	0	0	0	0	0	4	4	4	4	4	4	4	2	2	2	4	2	2	4	4	2	2	3
2021-04-28	32	2	2	2	5	infirmiere	8	2	2	2	2	2	2	2	2	2	2	1	1	2	2	2	0	0	0	0	0	0	0	0	0	2	2	2	4	4	4	2	2	2	2	3	2	2	4	4	2	2	4
2021-03-29	23	2	1	2	5	infirmiere	3	2	2	2	2	2	2	2	2	2	2	1	2	2	2	2	0	0	0	0	0	0	0	0	0	4	4	4	3	4	4	2	2	2	2	2	2	2	4	4	2	2	2
2021-04-16	19	2	1	2	5	infirmiere	3	2	2	1	2	2	1	2	2	2	2	2	2	2	2	2	0	0	0	0	0	0	0	0	0	2	2	2	4	4	4	5	2	2	4	4	2	2	4	4	2	2	2
2021-04-28	25	2	2	2	5	medecin	5	2	2	2	2	2	2	2	2	2	2	2	2	2	2	2	0	0	0	0	0	0	0	0	0	2	2	2	2	2	3	2	2	2	2	2	2	2	4	4	2	3	3
2021-05-07	23	2	1	2	5	medecin	5	2	2	2	2	2	2	2	2	1	2	1	1	2	1	2	0	0	0	0	0	0	0	0	0	4	2	4	2	4	2	4	4	2	2	3	4	2	4	4	2	2	2
2021-05-11	24	1	1	2	5	medecin	2	2	2		2	2	2	2	2	1	2	2	1	2	2	2	0	0	0	0	0	0	0	0	0	2	4	4	4	3	4	4	2	2	4	3	2	4	2	4	2	3	2
2021-04-01	38	2	1	2	4	medecin	2	2	2	2	2	2	1	2	1	2	1	1	1	1	2	2	0	0	0	0	0	0	0	0	0	4	4	4	4	4	4	5	4	2	3	5	4	4	4	4	4	2	2
2021-05-18	28	2	1	2	4	sagef	5	2	2	2	2	2	2	2	2	1	1	2	1	2	2	2	0	0	0	0	0	0	0	0	0	4	4	4	2	2	2	5	4	2	4	4	4	4	4	4	2	2	2
2021-05-24	29	2	2	2	4	sagef	6	2	2	2	2	2	2	2	2	2	2	1	1	2	2	2	0	0	0	0	0	0	0	0	0	2	4	4	4	4	4	2	4	2	4	2	1	2	4	3	2	1	1
2021-05-24	38	1	1	2	4	sagef	4	2	2		2	2	2	2	1	2	2	2	2	1	1	2	0	0	0	0	0	0	0	0	0	4	4	4	2	3	2	2	4	2	5	3	2	4	5	4	2	2	4
2021-06-22	26	2	2	2	5	sagef	2	2	2	2	2	2	2	2	2	2	1	2	2	1	1	2	0	0	0	0	0	0	0	0	0	2	2	2	4	4	4	4	3	3	4	4	3	3	4	4	2	3	2
2021-06-11	52	2	3	2	5	stagiaire	4	2	1	2	2	2	2	2	2	1	1	1	1	1	2	2	0	0	0	0	0	0	0	0	0	4	2	2	4	4	4	4	4	3	4	4	2	2	4	4	2	2	2
2021-04-01	40	2	1	2	5	stagiaire	8	2	2	2	2	2	2	2	2	2	2	1	1	2	2	2	0	0	0	0	0	0	0	0	0	4	4	4	4	4	4	4	4	3	4	4	2	2	4	4	4	2	2
2021-04-01	22	2	1	2	5	infirmiere	3	2	2	2	2	2	2	2	2	2	2	1	2	2	2	2	0	0	0	0	0	0	0	0	0	2	2	2	4	4	4	4	4	2	4	4	4	4	4	4	2	2	3
2021-05-26	27	2	2	2	4	infirmiere	2	2	2	1	2	2	2	2	2	2	1	2	2	2	2	2	0	0	0	0	0	0	0	0	0	4	3	3	4	4	3	3	3	1	2	3	2	2	4	4	2	2	3
2021-04-13	19	2	2	2	5	infirmiere	3	2	2	2	2	2	2	2	2	2	2	2	2	2	2	2	0	0	0	0	0	0	0	0	0	2	2	2	4	4	2	5	2	2	2	4	2	2	3	3	2	2	2
2021-05-26	30	1	2	2	5	infirmiere	3	3	2		2	2	2	2	1	2	2	1	2	2	2	2	0	0	0	0	0	0	0	0	0	2	4	4	4	4	3	4	4	2	2	2	2	2	4	4	2	2	2
2021-03-31	20	2	2	2	5	medecin	6	3	2	2	2	2	1	2	2	2	2	2	2	2	2	2	0	0	0	0	0	0	0	0	0	2	2	2	2	4	4	3	2	2	2	2	2	2	4	4	2	3	3
2021-04-27	21	2	2	2	5	medecin	6	3	2	2	2	2	2	2	2	2	1	2	1	2	2	2	0	0	0	0	0	0	0	0	0	2	4	4	4	4	4	5	4	2	4	4	4	4	4	4	2	2	3
2021-04-20	23	2	2	2	5	sagef	4	3	2	2	2	2	2	2	2	2	2	1	1	2	2	2	0	0	0	0	0	0	0	0	0	4	4	4	5	5	4	4	2	2	2	2	2	2	4	4	3	3	3
2021-05-26	30	2	1	2	4	infirmiere	6	3	2	1	2	2	1	2	2	2	1	1	1	1	2	2	0	0	0	0	0	0	0	0	0	4	4	2	4	4	2	2	1	2	4	1	1	2	5	4	2	3	2
2021-06-09	28	1	2	2	4	infirmiere	5	3	2		2	2	2	2	2	2	1	2	1	1	2	2	0	0	0	0	0	0	0	0	0	4	4	4	4	4	4	2	4	2	4	4	2	4	4	4	3	2	2
2021-04-01	22	2	1	2	5	infirmiere	10	3	2	2	2	2	2	2	2	2	2	2	2	2	2	2	0	0	0	0	0	0	0	0	0	2	2	4	4	2	2	2	2	2	2	2	2	2	4	4	2	2	2
2021-04-01	24	2	2	2	5	infirmiere	10	4	2	2	2	2	2	2	2	2	1	1	1	1	2	2	0	0	0	0	0	0	0	0	0	1	2	3	4	4	4	3	3	3	3	4	2	2	4	4	2	2	2
2021-04-08	23	2	2	2	5	infirmiere	4	4	2	2	2	2	2	2	2	2	1	2	1	1	1	2	0	0	0	0	0	0	0	0	0	2	2	2	4	4	4	4	4	2	4	4	2	2	4	4	2	4	2
2021-04-08	23	2	1	2	5	infirmiere	7	4	2	2	2	2	2	2	1	2	1	1	1	1	1	2	0	0	0	0	0	0	0	0	0	2	2	2	2	4	4	4	4	4	4	4	4	4	4	4	2	2	2
2021-04-13	22	2	1	2	5	medecin	4	4	2	2	2	2	2	2	2	2	1	2	1	1	1	2	0	0	0	0	0	0	0	0	0	2	2	2	4	4	4	4	4	2	4	4	2	2	4	4	4	2	2
2021-04-19	24	2	2	2	5	medecin	4	4	2	2	2	2	2	2	2	2	2	2	2	2	2	2	0	0	0	0	0	0	0	0	0	2	2	2	4	4	4	4	4	4	4	4	2	4	4	4	2	2	2
2021-04-15	22	2	2	2	4	medecin	4	4	2	2	2	2	2	2	1	2	1	1	1	2	2	2	0	0	0	0	0	0	0	0	0	2	2	4	4	4	3	2	4	2	4	4	2	2	2	3	4	2	2
2021-04-13	49	2	3	2	4	stagiaire	4	4	2	2	2	2	2	2	2	2	1	1	1	1	1	2	0	0	0	0	0	0	0	0	0	4	4	4	4	4	3	3	2	2	2	2	2	2	4	4	2	2	2
2021-05-19	29	1	2	2	4	medecin	5	4	2		2	2	2	2	2	2	1	1	1	1	1	2	0	0	0	0	0	0	0	0	0	3	5	3	5	5	5	3	1	1	1	2	1	1	4	4	1	1	2
2021-04-28	25	1	2	2	4	infirmiere	4	4	2		2	2	2	2	2	2	1	2	1	1	1	2	0	0	0	0	0	0	0	0	0	4	4	4	2	4	2	2	2	2	2	4	2	2	2	4	4	2	4
2021-03-25	23	2	2	2	5	infirmiere	6	4	2	2	2	2	2	2	2	2	1	1	1	1	2	2	0	0	0	0	0	0	0	0	0	4	2	4	4	2	2	4	4	3	5	4	2	2	4	4	4	2	2
2021-04-14	22	2	2	2	3	infirmiere	10	4	2	2	2	2	1	2	2	2	2	2	2	1	2	2	0	0	0	0	0	0	0	0	0	2	4	2	4	4	4	4	4	4	4	4	2	2	4	4	2	2	2
2021-04-14	31	1	2	2	5	medecin	7	5	2		2	2	2	2	2	2	1	1	1	2	1	2	0	0	0	0	0	0	0	0	0	4	4	4	5	5	4	2	3	2	2	2	2	2	4	4	2	2	4
2021-04-30	24	2	2	2	5	sagef	5	5	2	2	2	2	1	2	2	2	2	1	1	2	2	2	0	0	0	0	0	0	0	0	0	2	2	2	4	4	4	5	4	2	4	4	2	2	4	4	2	4	2
2021-05-20	22	2	2	2	5	infirmiere	6	5	2	2	2	2	1	2	2	1	2	2	1	2	2	2	0	0	0	0	0	0	0	0	0	4	2	2	4	4	4	5	4	2	4	3	2	2	4	4	4	2	2
2021-04-15	60	1	1	2	4	medecin	9	5	2		2	1	2	2	2	2	1	1	1	1	1	2	0	0	0	0	0	0	0	0	0	3	3	3	3	3	3	2	2	2	2	2	3	3	3	4	4	3	4
2021-04-27	22	2	2	2	5	stagiaire	10	5	2	2	2	2	2	2	1	2	2	2	2	2	2	2	0	0	0	0	0	0	0	0	0	2	2	2	2	4	2	2	2	2	2	4	2	2	4	4	2	2	2
2021-05-20	22	2	1	2	5	infirmiere	8	6	2	2	2	2	2	2	2	2	2	2	2	2	2	2	0	0	0	0	0	0	0	0	0	2	2	2	4	2	4	2	4	2	4	4	2	2	4	4	2	2	2
2021-04-27	29	2	1	2	4	medecin	6	6	1	2	2	2	1	2	2	2	1	1	1	2	2	2	0	0	0	0	0	0	0	0	0	3	4	4	5	2	4	5	4	2	4	2	2	2	4	4	4	2	2
2021-06-02	26	2	2	2	4	medecin	6	6	2	2	2	2	2	2	2	2	2	1	1	2	2	2	0	0	0	0	0	0	0	0	0	2	2	1	4	4	4	2	1	2	1	2	1	1	4	2	2	2	2
2021-04-14	25	1	2	2	5	infirmiere	10	7	2		2	2	1	2	2	2	2	1	2	2	2	2	0	0	0	0	0	0	0	0	0	4	4	4	4	4	4	3	2	2	4	4	4	4	4	4	2	3	3
2021-03-31	30	2	2	2	4	medecin	10	7	2	2	2	2	1	2	2	1	1	1	1	1	1	2	0	0	0	0	0	0	0	0	0	2	2	2	4	4	4	3	4	2	2	2	2	2	4	4	4	2	2
2021-06-05	26	1	2	3	4	medecin	8	5	2		2	2	2	2	2	2	1	1	1	1	1	1	0	0	0	1	1	1	0	0	0	2	2	2	4	4	4	2	2	2	2	4	2	1	4	4	4	2	2
2021-05-19	29	2	1	3	5	medecin	6	4	2	2	2	2	2	2	2	2	1	2	2	2	2	1	0	1	1	1	0	0	0	0	0	4	4	4	4	4	4	4	2	2	4	2	2	2	4	4	2	2	2
2021-04-26	27	1	2	3	4	medecin	2	2	2		2	2	2	2	2	2	1	1	1	1	1	1	1	0	1	0	0	1	0	0	0	2	2	2	4	2	2	3	4	2	4	3	2	3	3	4	2	2	2
2021-05-24	32	1	2	3	4	medecin	6	2	2		2	2	1	2	1	1	1	1	1	1	1	1	0	0	0	0	0	1	1	1	0	4	4	4	5	5	5	5	4	2	4	4	2	2	4	4	2	2	2
2021-05-24	29	1	2	3	2	medecin	1	1	2		2	2	1	2	2	2	1	1	1	1	2	1	1	1	1	1	1	1	1	1	0	3	4	4	4	3	4	4	4	4	2	4	4	4	4	4	4	4	4
2021-04-17	35	1	3	3	4	infirmiere	1	1	2		2	2	1	2	2	2	2	1	1	1	1	2	0	0	0	0	0	0	0	0	0	4	4	4	4	4	4	4	4	4	4	4	2	4	4	4	2	2	2
2021-04-14	26	2	1	3	4	sagef	7	2	2	2	2	2	1	2	2	2	1	2	1	2	2	2	0	0	0	0	0	0	0	0	0	2	2	2	4	4	4	4	2	2	2	2	2	2	4	4	4	2	2
2021-04-14	28	2	1	3	3	stagiaire	3	2	2	2	2	2	2	2	1	2	1	2	2	2	2	2	0	0	0	0	0	0	0	0	0	4	4	4	4	4	4	5	4	4	2	4	4	2	4	4	2	2	2
2021-04-19	20	2	1	3	5	infirmiere	6	3	2	2	2	2	1	2	2	2	2	2	2	2	2	2	0	0	0	0	0	0	0	0	0	2	2	2	4	4	3	4	2	2	4	4	2	2	4	4	4	2	2
2021-05-24	28	2	1	3	5	ats	5	3	2	1	2	2	1	2	2	1	1	1	1	1	1	2	0	0	0	0	0	0	0	0	0	4	4	4	5	2	4	5	2	2	5	4	4	2	4	4	2	2	2
2021-05-29	27	1	2	3	4	infirmiere	5	3	2		2	2	2	2	2	2	1	1	1	1	2	2	0	0	0	0	0	0	0	0	0	3	1	1	4	1	1	3	1	3	4	1	4	1	4	4	1	1	4
2021-06-22	45	2	1	3	5	infirmiere	3	2	2	2	2	2	1	2	2	2	1	2	1	1	2	1	1	1	0	0	1	0	0	0	0	2	4	2	4	4	4	4	4	2	4	4	4	2	4	4	2	2	2
2021-06-22	63	2	4	3	5	medecin	10	7	2	2	2	1	2	2	2	2	1	2	2	1	2	2	0	0	0	0	0	0	0	0	0	2	2	2	4	4	4	4	4	2	4	4	2	4	4	4	2	2	2
2021-05-19	26	2	1	3	5	medecin	4	2	2	2	2	2	1	2	2	2	1	1	2	2	2	1	0	1	1	1	0	0	0	0	0	4	4	4	4	4	4	4	4	4	4	4	4	4	4	4	4	2	2
2021-03-31	28	1	1	3	3	infirmiere	4	2	2		2	2	2	2	2	2	1	2	2	1	1	1	0	0	0	0	0	0	1	0	0	2	2	2	5	4	5	5	4	2	4	4	4	2	4	4	4	2	2
2021-05-31	42	1	1	3	4	medecin	3	2	2		2	2	2	2	2	2	1	2	2	1	1	1	0	1	0	1	0	0	1	0	0	4	4	4	4	4	4	4	2	2	4	2	4	4	4	4	4	2	2
2021-05-20	30	1	2	3	4	medecin	5	2	1		2	2	2	1	1	2	1	1	1	1	1	1	0	0	0	0	1	1	1	0	0	4	4	2	4	4	4	2	2	1	1	2	1	1	5	5	3	2	2
2021-05-03	30	2	2	3	5	infirmiere	12	5	2	2	2	2	2	2	2	2	1	1	1	1	2	1	1	0	1	0	0	0	0	1	0	4	4	4	4	4	4	4	4	4	4	4	4	4	4	4	4	2	2
2021-05-19	38	2	1	3	4	sagef	6	2	2	2	2	2	2	2	2	2	1	1	1	2	2	2	0	0	0	0	0	0	0	0	0	2	2	2	4	2	2	2	2	2	2	3	2	2	4	4	2	2	2
2021-04-20	39	1	2	3	4	medecin	1	1	2		2	2	1	2	1	2	1	1	1	1	1	2	0	0	0	0	0	0	0	0	0	2	2	2	2	4	2	2	2	2	2	4	2	2	4	4	4	2	2
2021-05-16	32	2	1	3	5	infirmiere	15	10	2	2	2	2	2	2	2	2	2	2	1	2	2	1	1	1	0	0	1	0	0	0	0	4	4	4	4	4	4	5	5	2	5	4	3	4	4	4	2	2	2
2021-06-08	28	2	1	3	5	infirmiere	15	8	2	2	2	2	2	2	2	2	1	1	1	1	2	1	0	0	1	1	1	0	0	0	0	2	2	2	4	4	4	4	4	4	4	4	4	4	4	4	4	2	2
2021-05-31	27	1	2	3	4	medecin	4	3	2		2	2	2	2	2	2	1	1	1	1	2	1	1	1	0	0	0	1	0	0	0	2	4	2	4	2	4	4	4	4	4	4	2	2	4	4	2	2	2
2021-05-28	27	2	2	3	5	medecin	6	3	2	2	2	2	2	2	2	2	2	2	2	2	2	1	0	0	1	0	1	1	0	0	0	2	2	2	4	4	4	2	4	4	4	3	2	4	4	4	2	2	2
2021-05-24	30	2	2	3	5	medecin	2	2	2	2	2	2	2	2	2	2	1	1	1	1	1	1	0	1	1	0	0	0	1	0	0	4	4	4	5	5	5	4	2	2	4	4	2	2	4	4	4	4	4
2021-05-18	30	1	2	3	4	medecin	2	2	2		2	2	2	2	2	2	1	1	1	1	1	1	0	0	0	0	1	1	1	0	0	4	4	4	4	4	4	3	4	2	4	4	2	2	4	4	4	4	2
2021-05-31	25	1	2	3	4	medecin	6	2	2		2	2	1	2	2	2	1	1	1	1	1	1	0	0	0	0	0	1	1	1	0	4	2	2	4	4	2	4	2	2	4	4	4	2	4	4	4	4	2
2021-04-30	30	1	2	3	4	medecin	1	1	2		2	2	1	2	2	2	1	1	1	1	1	1	0	1	0	1	0	0	0	0	1	4	4	4	4	4	4	5	4	2	4	2	2	4	4	4	2	2	2
2021-05-28	28	1	2	3	4	infirmiere	1	1	1		2	2	2	2	2	2	2	2	1	1	1	2	0	0	0	0	0	0	0	0	0	4	3	3	5	5	5	4	3	2	2	2	2	2	4	4	2	2	3
2021-04-01	31	1	2	3	4	infirmiere	5	4	2		2	2	1	1	1	2	1	1	1	1	2	2	0	0	0	0	0	0	0	0	0	2	3	3	5	5	5	5	4	2	4	4	2	2	4	4	4	2	2
2021-05-24	33	2	1	3	4	medecin	3	2	2	2	2	2	2	2	2	2	1	1	1	1	1	1	0	0	1	1	1	0	0	0	0	4	4	4	4	4	4	4	4	4	4	4	2	2	4	4	4	4	4
2021-06-01	31	2	2	3	5	ats	3	3	2	2	2	2	1	2	1	2	1	1	1	1	1	1	0	0	1	1	1	0	0	0	0	4	4	4	4	4	4	2	2	2	2	4	2	2	4	4	2	2	2
2021-05-18	31	1	2	3	5	infirmiere	4	2	2		2	2	2	2	2	2	1	1	1	1	1	2	0	0	0	0	0	0	0	0	0	1	1	1	4	4	4	2	2	2	2	2	1	1	4	4	4	2	2
2021-04-20	28	1	1	3	4	medecin	2	2	2		2	2	1	2	2	2	1	2	1	2	2	2	0	0	0	0	0	0	0	0	0	2	2	4	4	4	2	2	2	2	2	2	2	2	4	4	2	2	2
2021-06-05	26	2	1	3	5	medecin	6	4	2	2	2	2	1	2	2	2	1	2	1	2	2	2	0	0	0	0	0	0	0	0	0	4	4	4	4	4	4	5	4	4	2	4	2	2	5	5	4	4	2
2021-06-04	47	2	1	3	5	medecin	8	4	2	2	2	2	2	2	2	2	1	1	1	1	1	1	1	1	1	0	0	0	0	0	0	4	4	4	5	5	4	4	4	4	5	4	4	4	4	4	2	2	2
2021-04-14	23	1	2	3	4	infirmiere	3	2	2		2	2	2	2	1	2	1	1	2	2	2	1	0	1	0	1	1	0	0	0	0	2	4	4	4	4	2	2	3	2	2	2	2	2	3	4	4	2	2
2021-05-28	33	1	2	3	4	medecin	2	2	1		2	2	2	2	2	2	1	1	1	1	1	1	0	0	1	1	1	0	0	0	0	4	4	4	5	4	4	4	4	1	2	4	1	1	4	4	2	2	2
2021-04-17	38	2	2	3	4	infirmiere	1	1	2	2	2	2	1	2	1	2	2	1	1	1	1	1	0	0	0	1	1	1	0	0	0	2	4	2	4	4	4	3	3	2	2	4	2	2	4	2	4	2	2
2021-06-05	27	1	2	3	5	infirmiere	13	5	2		2	2	2	2	1	2	1	1	1	2	2	1	0	0	1	0	0	1	1	0	0	4	4	4	4	4	2	2	2	1	1	3	2	2	2	4	4	4	2
2021-04-30	32	1	2	3	4	medecin	1	1	2		2	2	1	2	2	2	1	1	1	1	1	1	0	0	1	0	1	0	0	1	0	2	4	4	4	4	4	4	2	2	4	2	2	2	4	4	2	2	2
2021-05-26	28	2	3	3	5	medecin	15	5	2	2	2	2	1	2	2	2	1	1	1	2	2	1	0	0	0	1	0	0	1	1	0	4	4	4	4	4	4	4	4	2	2	4	2	1	4	4	4	2	2
2021-04-03	32	2	2	3	5	medecin	1	1	2	2	2	2	2	2	2	2	1	1	1	2	2	2	0	0	0	0	0	0	0	0	0	2	2	2	4	4	3	3	2	2	2	4	4	2	4	4	4	4	4
2021-05-19	33	1	2	3	4	medecin	1	1	1		2	2	2	2	2	2	1	1	1	2	2	2	0	0	0	0	0	0	0	0	0	4	4	4	4	4	4	4	4	2	4	4	2	2	4	4	4	4	4
2021-04-19	32	1	2	3	4	sagef	2	2	2		2	2	2	2	2	2	2	2	2	1	1	2	0	0	0	0	0	0	0	0	0	2	2	4	3	4	4	2	3	2	4	2	2	2	4	4	4	2	2
2021-04-19	26	2	1	3	4	medecin	6	2	2	2	2	2	2	2	2	2	1	2	2	2	2	2	0	0	0	0	0	0	0	0	0	2	2	2	4	4	4	4	4	4	4	4	4	2	4	4	2	2	4
2021-04-30	37	1	2	3	4	medecin	4	2	2		2	2	2	2	2	2	1	1	1	1	1	2	0	0	0	0	0	0	0	0	0	2	4	2	4	4	4	4	4	4	4	3	4	4	4	4	2	2	2
2021-04-17	23	2	2	3	3	stagiaire	6	3	2	2	2	2	1	2	1	2	2	1	2	2	1	2	0	0	0	0	0	0	0	0	0	4	4	4	4	4	4	4	4	2	2	4	4	4	4	4	2	2	2
2021-03-31	33	1	2	3	4	infirmiere	3	3	2		2	2	2	2	2	2	1	1	1	1	1	2	0	0	0	0	0	0	0	0	0	2	2	2	4	4	4	3	4	2	3	4	4	2	4	4	2	2	2
2021-03-31	45	1	1	3	4	infirmiere	10	4	2		1	2	2	2	2	2	1	1	1	1	1	2	0	0	0	0	0	0	0	0	0	2	2	2	4	4	4	3	3	2	3	2	2	2	4	4	2	2	2
2021-05-31	22	2	2	3	4	infirmiere	8	4	2	2	2	2	1	2	2	2	2	2	2	2	2	2	0	0	0	0	0	0	0	0	0	1	1	2	4	3	4	5	4	3	5	3	1	1	4	3	1	1	1
2021-05-24	28	1	2	3	5	medecin	22	10	2		2	2	2	2	2	2	1	1	1	2	2	2	0	0	0	0	0	0	0	0	0	2	2	2	5	5	5	5	4	2	3	4	2	2	4	4	2	2	2
2021-06-05	19	1	2	3	5	medecin	19	12	2		2	2	1	2	2	2	1	1	2	2	2	2	0	0	0	0	0	0	0	0	0	2	2	2	3	3	3	1	1	1	1	2	1	1	3	3	4	2	2
2021-06-04	28	1	2	3	5	medecin	1	1	2		2	2	2	2	2	2	2	1	1	1	1	1	0	1	0	1	1	0	0	0	0	4	4	2	4	2	4	4	4	2	4	4	2	2	4	4	2	2	2
2021-03-26	27	1	2	3	4	infirmiere	5	4	2		2	2	2	2	2	2	1	1	1	2	2	1	1	1	1	1	0	1	0	0	0	4	2	4	4	5	4	3	2	1	4	1	1	1	5	4	1	1	4
2021-05-26	33	2	1	3	4	medecin	6	2	1	1	2	2	1	2	2	2	1	1	1	1	1	1	1	0	0	1	0	0	1	0	0	4	4	4	4	4	4	4	2	4	4	4	4	4	4	4	4	2	2
2021-05-24	27	1	2	3	4	sagef	10	4	2		2	2	1	2	2	2	1	2	2	1	1	1	1	1	1	1	1	1	1	1	0	5	5	5	5	5	5	5	5	1	5	4	1	1	4	5	5	1	1
2021-05-28	40	2	1	3	5	para	6	5	2	2	2	2	2	2	2	2	1	1	1	1	1	1	0	0	1	1	1	0	0	0	0	4	4	4	4	4	4	4	2	2	4	4	2	2	4	4	4	2	2
2021-06-04	28	2	2	3	4	medecin	10	6	2	2	2	2	1	2	1	2	1	1	1	1	1	2	0	0	0	0	0	0	0	0	0	4	4	4	2	4	4	2	2	2	4	4	4	4	2	4	2	2	4
2021-06-28	27	2	1	3	5	medecin	7	5	2	1	2	2	1	1	2	2	2	1	1	1	2	1	0	0	1	0	1	0	1	0	0	1	4	4	5	5	5	2	2	4	1	5	2	3	1	1	2	2	2
2021-04-24	29	1	2	3	4	medecin	6	6	2		2	2	1	2	1	2	1	1	1	2	1	1	1	1	0	1	0	0	0	0	0	4	4	4	4	4	5	4	4	2	4	4	4	2	3	4	4	2	2
2021-05-18	29	1	2	3	4	sagef	6	6	2		2	2	1	2	1	2	1	1	1	2	2	1	0	1	1	0	1	0	0	0	0	4	4	4	5	4	5	4	4	2	4	5	5	4	4	4	2	2	2
2021-04-29	29	1	2	3	4	infirmiere	6	6	2		2	2	1	2	1	2	1	1	1	1	1	1	0	1	1	0	1	0	0	0	0	4	4	4	5	5	4	2	4	2	4	4	2	2	4	4	4	2	4
2021-05-31	29	1	2	3	4	sagef	6	6	2		2	2	1	2	1	2	1	1	2	1	1	1	1	0	0	1	1	0	0	0	0	4	4	4	4	5	5	5	4	4	4	4	2	4	4	3	4	2	2
2021-04-22	29	1	2	3	4	medecin	6	6	2		2	2	2	2	1	2	1	1	1	1	1	1	0	0	1	0	1	0	1	0	0	4	4	4	4	4	4	4	4	4	4	4	4	4	4	4	4	4	2
2021-03-31	30	1	2	3	4	medecin	5	3	2		2	2	2	1	1	2	1	1	1	1	1	2	0	0	0	0	0	0	0	0	0	2	4	4	5	4	5	3	3	3	3	3	3	2	4	4	2	2	2
2021-06-05	42	2	1	3	5	infirmiere	7	5	2	2	1	2	1	2	2	2	1	1	1	1	1	2	0	0	0	0	0	0	0	0	0	2	4	4	4	4	4	2	2	2	3	2	2	2	4	4	2	2	2
2021-05-19	29	1	2	3	4	medecin	6	6	1		2	2	2	2	2	2	1	1	1	1	2	2	0	0	0	0	0	0	0	0	0	4	4	4	4	4	4	3	4	2	2	4	4	4	4	4	4	2	2
2021-06-01	40	1	1	3	4	medecin	4	2	2		2	2	2	2	2	1	1	2	1	2	2	2	0	0	0	0	0	0	0	0	0	4	4	4	4	4	4	4	2	2	2	2	2	2	4	4	2	2	2
2021-05-29	31	1	2	3	4	sagef	8	4	2		2	2	2	2	2	2	1	1	1	1	1	2	0	0	0	0	0	0	0	0	0	4	4	4	4	4	4	5	4	4	4	4	3	4	4	5	2	2	2
2021-04-17	25	1	2	3	4	medecin	7	5	2		2	2	2	2	2	2	2	1	1	2	2	2	0	0	0	0	0	0	0	0	0	4	4	4	4	4	4	4	3	2	4	4	2	2	4	4	4	2	2
2021-04-02	40	1	2	3	4	infirmiere	1	1	1		2	2	2	2	1	2	1	2	1	1	1	1	1	1	1	0	0	0	0	0	0	3	4	3	4	4	4	4	3	2	1	1	1	1	4	4	1	1	1
2021-04-30	45	2	4	3	5	medecin	6	4	2	2	2	2	2	2	2	2	1	1	1	2	2	1	1	0	1	0	1	0	0	0	0	2	2	2	4	4	4	5	4	4	4	4	4	4	4	4	4	2	2
2021-05-05	48	1	1	3	4	medecin	6	5	2		2	1	1	2	2	2	1	1	1	1	1	1	0	1	1	0	1	0	0	0	0	2	4	4	5	4	5	4	4	4	2	4	2	2	4	4	2	2	4
2021-05-24	30	1	2	3	5	medecin	1	1	2		2	2	1	2	2	2	2	2	2	2	2	1	0	1	0	1	1	0	0	0	0	2	2	4	4	4	4	4	2	2	2	2	2	2	4	4	4	2	2
2021-04-26	29	1	2	3	4	medecin	1	1	2		2	2	1	2	2	2	1	1	1	2	2	1	0	0	1	1	1	0	0	0	0	4	2	2	4	4	4	2	2	2	2	4	2	2	4	4	2	2	2
2021-05-26	25	1	1	3	4	medecin	6	6	2		2	2	2	2	2	2	1	1	1	1	1	1	0	0	1	1	1	0	0	0	0	4	4	4	4	4	5	5	4	2	4	2	1	1	4	4	4	2	2
2021-04-17	34	1	1	3	4	infirmiere	5	3	2		2	2	2	2	2	2	1	1	1	1	1	1	0	1	1	0	0	1	0	0	0	3	3	3	5	5	5	5	4	4	4	3	2	3	4	4	4	2	2
2021-05-28	32	1	2	3	4	infirmiere	6	5	2		2	2	2	2	2	2	1	1	1	1	1	1	0	1	1	0	0	1	0	0	0	3	5	5	5	5	5	4	4	3	3	2	2	2	5	5	2	2	1
2021-05-24	30	1	1	3	4	medecin	4	2	2		2	2	2	2	1	2	1	1	2	1	1	1	0	0	0	1	1	1	0	0	0	4	4	4	4	4	4	4	4	2	4	3	2	2	4	4	4	2	2
2021-05-24	31	2	3	3	5	sagef	5	2	2	2	2	2	2	2	2	2	1	1	1	1	2	2	0	0	0	0	0	0	0	0	0	2	2	2	4	4	4	1	2	1	1	2	2	1	4	4	4	2	4
2021-06-04	24	2	2	3	5	sagef	3	2	2	2	2	2	1	2	2	2	1	1	1	1	1	2	0	0	0	0	0	0	0	0	0	4	4	4	2	4	3	2	2	2	4	2	2	2	3	3	4	2	2
2021-05-25	48	1	1	3	4	sagef	9	5	2		2	2	1	2	1	2	1	1	1	1	1	2	0	0	0	0	0	0	0	0	0	4	4	4	4	4	3	2	3	1	1	3	1	1	5	5	4	2	2
2021-04-30	52	2	1	3	5	medecin	5	5	2	2	2	2	2	2	2	1	2	2	2	2	2	2	0	0	0	0	0	0	0	0	0	2	4	2	4	4	4	5	4	4	4	4	2	2	4	4	2	2	2
2021-04-30	53	2	1	3	5	medecin	10	10	2	2	2	1	2	2	2	1	2	2	1	2	2	2	0	0	0	0	0	0	0	0	0	2	2	3	4	3	2	4	4	4	4	4	4	4	4	4	4	2	2
2021-04-30	49	2	1	3	5	ats	5	2	2	2	2	2	2	2	1	2	2	2	1	2	2	1	0	0	1	1	0	1	0	0	0	4	4	4	4	2	4	4	4	4	2	3	2	2	4	4	4	2	3
2021-04-26	40	1	1	3	4	infirmiere	7	4	2		2	2	2	2	2	2	1	1	1	1	1	1	0	0	0	1	1	1	0	0	0	4	4	4	4	4	4	4	4	4	4	2	2	4	4	4	4	2	2
2021-05-24	52	1	1	3	4	infirmiere	6	2	2		1	1	2	2	2	2	1	1	1	1	1	1	0	0	0	0	1	1	1	0	0	4	4	4	4	4	4	4	4	2	2	2	1	1	5	5	3	3	3
2021-03-31	26	1	1	3	5	medecin	4	2	2		2	2	2	2	2	2	1	1	1	1	2	2	0	0	0	0	0	0	0	0	0	1	1	1	4	5	5	4	3	2	4	2	2	2	4	4	2	2	2
2021-06-04	42	2	1	3	5	infirmiere	5	2	2	2	2	2	2	2	2	2	1	1	1	2	2	2	0	0	0	0	0	0	0	0	0	2	2	2	4	4	4	2	2	2	2	3	1	1	4	4	2	2	2
2021-05-20	42	2	1	3	5	medecin	5	3	2	2	2	2	1	2	2	2	2	1	1	2	2	2	0	0	0	0	0	0	0	0	0	4	4	4	4	4	4	4	2	2	2	4	2	2	4	4	2	2	2
2021-05-24	38	1	1	3	4	medecin	10	4	2		2	2	1	2	2	2	2	1	1	1	2	2	0	0	0	0	0	0	0	0	0	2	2	2	4	4	4	2	4	2	2	2	2	2	4	4	2	2	2
2021-04-26	52	2	1	3	5	medecin	13	12	2	2	2	2	2	2	2	2	2	2	2	2	2	2	0	0	0	0	0	0	0	0	0	4	4	2	4	4	2	5	4	4	4	4	2	2	4	4	2	2	2
2021-06-04	35	1	1	3	4	medecin	4	2	2		2	2	2	2	2	2	1	1	1	1	1	2	0	0	0	0	0	0	0	0	0	4	4	2	4	4	2	4	2	2	2	4	4	2	4	4	4	4	4
2021-04-03	49	1	1	3	4	medecin	8	2	1		1	2	2	2	2	2	1	1	1	1	1	1	0	0	0	1	1	0	0	0	0	4	4	4	5	5	5	4	4	2	2	4	2	2	4	4	2	2	2
2021-06-03	50	2	1	3	4	medecin	10	7	2	2	2	2	1	2	2	2	1	1	1	1	1	1	0	1	0	1	1	0	0	0	0	4	4	4	4	4	4	4	4	2	4	4	4	4	4	4	4	2	2
2021-04-01	35	1	1	3	4	medecin	7	4	2		2	2	2	2	2	2	1	1	1	1	1	1	0	0	1	0	1	1	0	0	0	2	4	4	4	4	3	4	2	2	4	2	2	2	4	4	4	2	2
2021-05-29	48	1	1	3	4	infirmiere	6	4	2		2	2	2	2	1	1	1	1	1	1	1	1	0	0	0	1	1	1	0	0	0	4	4	4	4	4	2	4	2	2	4	4	1	2	4	4	4	4	4
2021-04-30	32	1	1	3	4	medecin	6	3	2		2	2	2	2	2	2	1	1	1	1	1	1	0	0	0	1	1	0	0	0	1	4	2	4	4	4	4	4	4	2	2	2	2	2	4	4	4	2	2
2021-04-09	52	1	3	3	4	medecin	5	1	2		1	2	2	2	2	2	1	1	1	1	1	2	0	0	0	0	0	0	0	0	0	2	2	2	5	5	5	2	2	2	2	4	2	4	4	4	2	2	2
2021-06-04	29	2	1	3	5	medecin	2	2	2	2	2	2	2	2	2	2	1	2	2	2	2	2	0	0	0	0	0	0	0	0	0	4	4	4	4	4	4	2	2	2	2	2	2	2	4	4	2	2	2
2021-04-08	42	1	1	3	4	medecin	6	4	2		2	2	2	2	2	2	1	1	1	1	1	2	0	0	0	0	0	0	0	0	0	2	2	2	4	4	4	3	4	4	4	4	4	2	4	4	4	2	2
2021-06-04	45	1	1	3	4	medecin	10	4	2		2	2	2	2	2	2	1	1	1	1	1	1	0	0	0	0	1	1	1	0	0	4	4	4	4	4	4	4	2	2	4	3	2	2	4	4	4	4	2
2021-04-19	50	1	1	3	4	infirmiere	11	6	2		2	1	2	2	2	2	1	1	2	1	1	1	0	0	1	1	1	0	0	0	0	4	4	3	4	4	4	4	3	3	4	4	4	2	4	4	4	2	2
2021-04-30	48	1	1	3	4	infirmiere	30	9	2		2	2	2	2	2	2	1	1	2	1	2	1	0	1	0	1	0	1	0	0	0	4	2	2	4	4	4	4	4	2	4	2	2	2	4	4	4	2	2
2021-04-19	38	1	1	3	4	medecin	13	7	2		1	1	2	2	1	2	2	1	1	1	1	1	0	0	0	1	1	1	0	0	0	3	3	3	4	4	4	4	4	2	3	4	2	2	4	4	4	2	2
2021-05-31	75	2	4	3	4	medecin	5	5	2	2	1	1	2	2	2	2	1	1	1	1	1	1	0	0	0	0	1	1	0	1	0	4	4	4	4	4	4	4	4	4	4	4	4	4	4	4	4	4	2
2021-07-01	30	2	2	3	5	medecin	20	15	2	2	2	2	2	2	2	2	1	1	2	2	2	2	0	0	0	0	0	0	0	0	0	4	4	2	4	4	4	4	4	2	4	4	4	2	4	4	4	2	2
2021-06-01	58	1	1	3	4	medecin	6	5	2		1	2	1	2	2	2	1	1	1	1	1	1	0	0	1	1	0	0	0	0	1	4	4	4	4	4	4	2	2	2	2	4	2	2	4	4	4	2	2
2021-05-31	53	1	1	3	4	medecin	8	4	2		2	2	2	2	2	2	2	2	1	2	2	2	0	0	0	0	0	0	0	0	0	4	4	4	4	4	4	4	4	2	2	4	4	2	2	4	4	2	2
2021-04-29	50	2	4	3	4	medecin	8	7	2	2	1	1	1	2	1	2	1	1	1	1	1	2	0	0	0	0	0	0	0	0	0	4	4	4	4	4	4	4	4	4	4	4	4	4	4	4	2	2	2
2021-06-25	34	1	1	3	4	medecin	12	10	2		2	2	2	2	2	2	1	1	1	1	1	2	0	0	0	0	0	0	0	0	0	4	4	4	4	4	4	4	4	2	2	2	2	2	4	4	4	2	2
2021-06-30	24	1	2	3	4	infirmiere	2	2	2		2	2	1	2	2	2	1	1	1	1	1	1	0	0	1	0	1	1	0	0	0	4	4	4	2	4	4	4	4	2	2	4	2	2	4	4	2	2	2
2021-06-08	28	1	2	3	4	medecin	8	6	2		2	2	2	2	1	2	1	1	1	1	1	1	0	1	1	1	0	0	0	0	0	4	4	4	4	4	4	5	4	2	4	4	2	2	4	4	4	1	2
2021-04-23	30	1	2	3	4	medecin	5	2	2		2	2	1	2	1	2	1	1	1	1	1	1	0	0	1	0	1	0	0	0	0	4	2	4	4	4	4	2	3	2	4	2	2	2	4	4	2	2	2
2021-04-16	23	2	2	3	5	medecin	6	4	2	2	2	2	2	2	2	2	1	1	1	2	2	1	0	0	1	0	1	0	0	0	0	2	2	2	4	2	2	5	4	2	4	4	2	2	4	4	2	2	2
2021-04-15	25	2	2	3	4	sagef	5	5	2	2	2	2	1	2	2	2	2	1	1	1	1	1	0	0	1	0	1	0	0	0	0	4	2	4	4	4	4	4	2	3	2	2	2	2	4	4	4	2	2
2021-04-14	32	1	2	3	4	infirmiere	3	3	2		2	2	2	2	2	2	2	1	1	1	1	1	0	1	1	0	1	0	0	0	0	4	4	4	3	4	4	2	3	2	2	4	2	2	4	4	4	2	4
2021-05-11	27	1	2	3	4	medecin	1	1	2		2	2	2	2	2	2	1	2	1	1	1	1	0	1	0	1	1	0	0	0	0	4	2	4	4	5	2	2	4	2	4	2	2	2	4	4	2	2	2
2021-05-18	20	2	1	3	5	medecin	4	1	2	2	2	2	2	2	2	2	1	1	1	1	1	1	0	1	0	1	1	0	0	0	0	4	4	4	4	4	4	4	2	2	4	4	2	2	4	4	4	2	2
2021-05-27	29	2	2	3	5	medecin	7	4	2	2	2	2	2	2	2	2	2	2	1	2	2	1	0	1	0	1	1	0	0	0	0	2	4	4	4	4	4	4	4	2	2	4	4	4	4	4	4	2	2
2021-04-21	29	1	2	3	4	infirmiere	5	3	2		2	2	2	2	2	2	1	1	1	1	1	1	0	1	1	1	0	1	0	0	0	4	2	4	4	4	4	4	4	2	4	2	2	2	4	4	2	2	2
2021-04-13	30	1	2	3	4	medecin	2	2	2		2	2	2	2	2	2	1	1	1	1	1	1	0	0	0	0	1	1	0	0	0	2	2	2	5	5	4	2	2	2	2	2	2	2	5	5	4	2	2
2021-06-02	24	1	2	3	4	medecin	7	6	2		2	2	2	2	1	2	1	1	1	1	1	1	0	0	0	1	1	1	0	0	0	2	4	4	4	5	4	4	2	2	4	4	2	2	5	4	2	2	1
2021-04-20	18	2	2	3	5	medecin	7	7	2	2	2	2	2	2	2	2	1	2	2	2	2	1	0	0	0	0	0	0	1	0	0	4	2	4	4	4	4	5	2	2	2	4	4	2	4	4	2	4	4
2021-05-28	22	2	2	3	4	stagiaire	8	8	2	2	2	2	2	2	2	2	1	1	1	1	1	1	0	0	1	0	1	0	1	0	0	4	4	4	4	4	4	4	4	4	2	4	2	2	5	4	2	2	2
2021-04-21	29	1	2	3	4	medecin	12	10	2		2	2	2	2	1	1	1	1	1	1	1	1	0	1	1	0	0	0	0	0	1	4	4	4	4	2	4	4	4	2	4	4	2	2	4	4	2	2	4
2021-03-26	39	2	1	3	4	infirmiere	5	2	2	2	2	2	2	2	2	2	1	1	1	1	2	1	0	0	1	0	1	0	0	0	1	2	4	4	4	4	4	4	4	2	4	4	2	2	4	4	2	2	2
2021-06-02	26	1	2	3	4	infirmiere	1	1	2		2	2	2	2	2	2	2	1	1	1	1	1	0	0	0	1	0	1	0	0	1	2	2	4	4	4	4	4	4	4	4	2	2	2	4	5	2	2	2
2021-05-26	24	2	2	3	4	infirmiere	1	1	2	2	2	2	2	2	1	2	1	1	1	1	2	1	0	0	0	0	1	1	0	0	1	4	4	4	5	5	4	2	2	2	2	2	1	2	4	4	3	3	3
2021-04-06	19	2	2	3	5	infirmiere	7	1	2	2	2	2	1	2	1	2	1	1	1	1	1	2	0	0	0	0	0	0	0	0	0	3	2	4	4	4	4	3	2	2	2	4	4	4	4	4	2	2	2
2021-04-01	30	2	1	3	5	infirmiere	5	2	1	2	2	2	2	2	2	2	1	1	1	1	1	2	0	0	0	0	0	0	0	0	0	2	2	2	5	5	5	2	2	2	2	2	2	2	3	3	2	2	2
2021-05-24	32	2	1	3	5	medecin	4	2	2	2	2	2	2	2	2	2	2	2	1	2	2	2	0	0	0	0	0	0	0	0	0	3	4	4	4	5	4	2	2	2	2	4	2	2	4	4	2	1	1
2021-03-31	23	2	2	3	5	infirmiere	6	3	2	2	2	2	2	1	2	2	1	1	1	1	1	2	0	0	0	0	0	0	0	0	0	2	2	2	4	4	4	5	4	4	4	4	2	2	4	4	2	2	2
2021-04-28	27	2	2	3	5	medecin	5	3	2	2	2	2	1	2	1	2	1	2	1	2	2	2	0	0	0	0	0	0	0	0	0	4	4	2	5	5	4	4	4	2	4	4	2	2	4	4	2	2	2
2021-06-02	27	2	1	3	4	infirmiere	8	3	2	2	2	2	2	2	2	2	1	1	1	1	2	2	0	0	0	0	0	0	0	0	0	4	4	4	4	4	4	2	2	2	2	2	2	2	4	4	4	2	2
2021-05-24	23	1	2	3	5	infirmiere	4	4	2		2	2	2	2	2	2	1	2	2	2	2	2	0	0	0	0	0	0	0	0	0	2	2	1	5	4	4	5	4	2	2	4	2	2	4	4	2	1	2
2021-06-08	28	1	2	3	4	sagef	5	5	2		2	2	2	2	2	2	2	2	1	2	2	2	0	0	0	0	0	0	0	0	0	4	4	4	4	4	4	2	2	2	2	4	1	2	4	4	2	3	3
2021-04-28	33	2	1	3	5	infirmiere	11	7	2	2	2	2	2	2	2	2	1	2	1	2	2	2	0	0	0	0	0	0	0	0	0	4	4	4	4	4	4	5	4	4	4	5	2	2	4	4	4	2	2
2021-05-21	37	2	1	4	5	infirmiere	10	4	2	2	2	2	2	2	2	2	1	1	1	1	1	1	0	0	0	1	1	1	0	0	0	2	2	2	5	5	5	4	4	2	4	2	2	2	4	4	4	2	2
2021-05-25	23	2	1	4	5	infirmiere	5	2	2	2	1	2	2	2	1	1	1	1	1	1	1	1	0	0	0	0	1	1	1	0	0	4	4	4	4	4	4	4	2	2	3	4	1	4	4	4	2	2	2
2021-04-14	30	1	2	4	5	medecin	2	2	2		2	2	2	2	2	2	1	1	1	1	1	2	0	0	0	0	0	0	0	0	0	2	2	2	2	2	2	3	2	2	2	4	2	2	4	4	4	2	2
2021-05-18	23	2	2	4	5	medecin	8	3	2	2	2	2	2	2	2	2	1	1	1	1	1	2	0	0	0	0	0	0	0	0	0	2	2	2	4	4	4	2	3	2	2	4	2	2	4	4	4	2	2
2021-05-26	24	2	2	4	5	stagiaire	5	3	2	2	2	2	1	2	1	1	1	1	1	1	1	2	0	0	0	0	0	0	0	0	0	4	4	4	4	4	4	2	2	2	2	4	1	1	4	4	4	4	2
2021-05-28	27	1	2	4	4	medecin	6	4	2		2	2	1	2	2	2	1	1	1	1	1	2	0	0	0	0	0	0	0	0	0	4	4	4	5	4	2	2	4	2	4	4	2	2	4	5	4	2	2
2021-05-30	24	1	2	4	4	infirmiere	14	6	2		2	2	1	2	2	2	1	1	1	1	1	2	0	0	0	0	0	0	0	0	0	4	2	2	4	4	2	3	2	2	2	4	1	1	4	4	4	2	2
2021-03-24	25	2	1	4	5	medecin	4	2	2	2	2	2	1	2	2	2	1	1	1	2	2	1	0	1	0	0	1	0	1	0	0	2	4	4	5	4	4	5	2	2	4	2	2	2	4	4	2	1	1
2021-05-21	44	1	1	4	4	medecin	3	3	2		2	2	2	2	2	2	1	1	1	1	1	1	0	0	0	0	0	1	1	1	0	2	2	2	4	4	4	3	2	2	2	4	2	2	4	4	4	2	2
2021-04-28	24	2	2	4	5	infirmiere	6	1	2	2	2	2	2	2	2	2	2	1	1	2	2	2	0	0	0	0	0	0	0	0	0	2	2	2	4	4	4	4	2	4	4	4	3	2	4	4	4	2	2
2021-05-28	30	2	2	4	4	infirmiere	1	1	2	2	2	2	1	2	2	2	1	2	1	1	1	2	0	0	0	0	0	0	0	0	0	4	4	4	4	4	2	2	2	2	2	3	2	2	4	4	2	2	2
2021-04-19	33	1	1	4	4	biologiste	6	2	1		2	2	2	2	2	2	2	1	2	2	1	2	0	0	0	0	0	0	0	0	0	4	4	4	4	4	4	2	2	2	2	4	2	2	2	3	4	2	2
2021-05-26	23	2	2	4	5	medecin	4	3	2	2	2	2	1	2	1	2	1	1	2	2	2	2	0	0	0	0	0	0	0	0	0	4	4	4	4	4	4	2	4	1	2	4	1	1	4	4	4	2	2
2021-06-08	38	2	1	4	5	medecin	8	6	2	2	2	2	2	2	2	2	2	2	2	2	2	1	0	0	1	1	1	0	0	0	0	4	4	2	4	2	2	4	4	4	4	2	2	2	4	4	4	2	2
2021-06-04	27	2	2	4	4	medecin	10	6	2	2	2	2	1	2	1	2	1	1	1	2	2	1	0	0	0	0	0	1	0	0	0	5	5	5	5	5	5	5	1	4	4	2	5	1	4	4	1	1	2
2021-04-14	28	1	2	4	4	medecin	8	5	2		2	2	2	2	2	2	1	1	1	1	1	1	0	0	0	1	1	1	0	0	0	4	4	4	5	5	4	5	2	2	4	3	2	2	4	4	2	2	2
2021-04-14	34	1	1	4	4	medecin	2	2	2		2	2	1	1	2	2	1	2	2	2	2	2	0	0	0	0	0	0	0	0	0	2	3	2	4	3	4	4	4	4	4	2	4	4	4	3	4	2	2
2021-06-01	25	1	1	4	4	infirmiere	2	2	2		2	2	1	2	2	2	2	2	2	2	2	2	0	0	0	0	0	0	0	0	0	2	4	4	4	4	4	4	4	4	4	4	4	4	4	4	4	2	2
2021-04-09	30	1	2	4	4	medecin	3	3	2		2	2	1	2	2	2	1	1	1	1	1	1	0	0	0	0	0	1	0	0	0	2	2	2	5	4	4	4	3	2	4	4	3	2	4	4	2	2	2
2021-06-02	35	2	1	4	4	infirmiere	5	2	2	2	2	2	2	2	2	2	1	1	1	1	1	2	0	0	0	0	0	0	0	0	0	4	4	4	4	4	4	4	4	4	4	4	4	4	4	4	4	4	4
2021-06-05	29	1	2	4	5	infirmiere	3	3	1		2	2	1	2	1	2	1	1	1	1	1	1	0	0	1	0	1	1	0	0	0	4	4	2	4	4	2	2	2	2	2	2	2	2	4	4	2	2	2
2021-05-21	25	2	2	4	4	ats	5	5	2	2	2	2	2	2	1	2	1	1	1	1	1	1	0	0	1	0	1	1	0	0	0	4	4	4	4	4	4	4	4	2	4	4	2	4	2	4	2	4	4
2021-05-24	32	1	1	4	4	medecin	12	7	2		2	2	2	2	2	2	1	1	1	1	1	1	0	1	1	0	0	0	1	0	0	4	4	4	4	4	4	4	4	4	4	4	4	2	4	4	4	4	4
2021-06-02	21	2	1	4	5	infirmiere	2	2	1	1	2	2	1	2	2	2	1	1	1	1	1	1	0	1	0	1	0	0	1	0	0	2	4	2	5	4	4	5	4	2	4	4	2	2	4	4	4	2	2
2021-06-05	32	1	2	4	5	infirmiere	1	4	2		2	2	2	2	2	2	1	1	1	1	1	1	0	0	1	0	1	0	1	0	0	4	4	4	4	4	4	4	4	2	2	2	2	2	4	4	2	2	2
2021-06-01	29	1	2	4	4	medecin	1	1	2		2	2	2	2	2	2	1	1	1	1	1	1	0	0	0	0	1	1	1	0	0	2	4	2	4	4	4	4	2	2	4	2	2	2	4	4	2	2	2
2021-05-26	33	1	3	4	5	medecin	2	2	1		2	2	1	1	1	2	1	1	1	1	2	1	0	0	0	0	1	1	1	0	0	4	4	4	4	4	4	4	4	2	4	4	2	2	4	4	4	4	2
2021-04-01	30	1	2	4	5	sagef	8	2	2		2	2	2	2	1	2	1	1	1	1	2	2	0	0	0	0	0	0	0	0	0	1	2	4	4	4	4	2	2	2	2	3	2	1	3	3	2	2	2
2021-05-19	33	2	1	4	4	medecin	6	2	2	2	2	2	1	2	2	2	1	1	1	2	2	2	0	0	0	0	0	0	0	0	0	4	4	4	4	4	4	4	3	2	2	4	4	2	4	4	3	2	3
2021-05-28	28	2	1	4	4	infirmiere	6	2	2	2	2	2	2	2	1	2	1	1	1	1	1	2	0	0	0	0	0	0	0	0	0	2	2	4	4	4	4	3	3	2	4	2	2	2	4	4	2	2	2
2021-04-19	30	2	1	4	5	infirmiere	5	2	2	2	2	2	2	2	2	2	1	1	1	2	2	2	0	0	0	0	0	0	0	0	0	2	2	2	4	4	4	4	4	2	4	4	2	2	4	4	4	2	2
2021-04-20	34	2	1	4	4	medecin	7	3	2	2	2	2	1	2	2	2	1	1	1	2	2	2	0	0	0	0	0	0	0	0	0	2	4	2	4	4	4	5	4	2	2	4	2	2	4	4	4	2	2
2021-05-26	23	2	2	4	5	medecin	10	4	2	2	2	2	2	2	2	2	1	2	2	2	2	2	0	0	0	0	0	0	0	0	0	4	4	4	4	4	4	4	4	2	2	4	2	3	4	4	4	4	4
2021-05-20	42	1	1	4	5	medecin	9	5	2		2	2	2	2	2	2	1	1	1	1	1	2	0	0	0	0	0	0	0	0	0	4	4	4	5	4	4	4	4	4	4	4	4	4	4	4	4	4	4
2021-05-24	34	2	3	4	4	medecin	5	5	2	2	1	2	2	2	1	2	1	1	1	2	2	2	0	0	0	0	0	0	0	0	0	4	4	4	4	4	4	2	2	2	2	4	2	2	4	4	2	2	2
2021-06-01	29	2	2	4	4	infirmiere	9	9	2	2	2	2	1	2	1	2	1	1	1	1	1	2	0	0	0	0	0	0	0	0	0	4	4	4	4	4	4	4	4	2	2	4	4	4	4	4	4	4	4
2021-05-03	28	2	1	4	4	infirmiere	15	9	2	2	1	1	2	2	2	2	2	1	1	2	2	2	0	0	0	0	0	0	0	0	0	4	4	4	4	4	2	4	2	2	2	2	2	2	4	4	2	2	2
2021-04-09	32	1	2	4	4	infirmiere	2	2	1		2	2	2	2	2	2	1	1	1	1	1	1	0	0	0	0	1	1	0	0	0	2	2	2	2	4	4	5	3	2	2	3	2	2	4	4	2	2	2
2021-04-19	54	2	4	4	5	infirmiere	7	4	2	2	2	2	2	2	2	1	1	1	2	2	2	2	0	0	0	0	0	0	0	0	0	2	4	4	4	4	4	2	2	2	2	2	2	2	4	4	2	2	2
2021-06-01	26	1	2	4	4	medecin	13	10	2		2	2	2	2	2	2	1	1	1	1	1	2	0	0	0	0	0	0	0	0	0	4	4	4	4	4	4	4	2	2	2	2	2	2	4	3	4	2	2
2021-05-19	34	1	2	4	5	medecin	2	2	2		2	2	2	2	2	2	1	1	1	2	2	2	0	0	0	0	0	0	0	0	0	2	4	2	5	4	4	3	3	2	2	4	2	2	4	4	4	2	2
2021-05-26	35	1	1	4	5	medecin	6	2	2		2	2	2	2	2	2	1	1	1	2	2	1	0	1	1	1	0	0	0	0	0	4	4	4	4	4	4	4	4	2	4	4	4	4	4	4	4	4	4
2021-05-19	54	2	1	4	4	infirmiere	4	2	1	2	2	2	2	2	2	2	1	1	1	1	1	1	0	0	0	0	0	1	1	1	0	4	4	4	5	5	5	5	5	5	4	4	4	4	4	4	4	2	2
2021-05-24	36	1	2	4	4	infirmiere	6	6	2		2	2	2	2	2	2	1	1	1	1	1	1	0	0	1	1	0	1	0	0	0	4	4	4	4	4	5	4	2	2	2	4	2	2	5	5	2	2	2
2021-06-04	25	1	2	4	4	medecin	5	1	2		2	2	1	2	2	2	1	1	1	1	1	1	1	1	0	0	1	0	0	0	0	4	4	4	2	4	2	2	2	2	2	2	2	2	4	4	4	2	2
2021-04-07	39	1	3	4	4	ats	2	2	1		2	2	1	2	1	2	1	1	1	1	1	2	0	0	0	0	0	0	0	0	0	4	4	4	4	4	4	3	2	2	3	4	4	4	4	4	4	2	2
2021-03-31	24	2	1	4	5	medecin	2	2	2	1	2	2	1	2	2	2	1	1	1	2	2	2	0	0	0	0	0	0	0	0	0	2	2	2	4	2	2	4	4	2	4	2	4	2	4	2	2	2	2
2021-06-05	28	1	2	4	4	sagef	5	3	2		2	2	2	2	1	2	1	1	1	1	1	2	0	0	0	0	0	0	0	0	0	4	4	4	4	4	4	4	4	2	4	4	2	2	4	4	2	2	2
2021-06-08	23	2	2	4	5	infirmiere	10	5	2	2	2	2	2	2	2	2	2	2	2	2	2	2	0	0	0	0	0	0	0	0	0	2	2	2	4	4	4	4	4	4	4	4	4	4	4	4	4	2	2
2021-06-05	32	1	1	4	4	sagef	22	10	2		2	2	2	2	2	2	1	1	1	1	1	2	0	0	0	0	0	0	0	0	0	4	4	4	4	4	4	4	2	2	2	4	2	2	4	4	4	2	2
2021-03-25	53	2	1	4	5	medecin	6	4	2	2	2	2	2	2	2	2	1	1	1	2	2	1	0	0	1	0	0	0	1	0	1	2	4	4	4	4	4	5	4	2	4	4	2	2	4	4	2	2	3
2021-03-24	55	2	1	4	4	medecin	4	3	2	2	2	2	2	2	1	2	2	1	1	2	2	1	1	1	0	0	0	0	0	0	0	4	4	4	5	2	5	5	4	4	4	4	5	2	4	5	4	4	4
2021-04-03	46	2	4	4	4	medecin	5	5	2	2	2	1	2	1	1	2	1	1	1	1	1	1	1	0	1	0	0	0	0	0	0	4	4	4	4	4	4	3	3	3	3	4	4	4	4	4	4	2	2
2021-06-04	36	1	1	4	4	sagef	4	3	2		2	2	1	2	2	2	1	1	1	1	1	1	0	0	1	1	1	0	0	0	0	2	4	2	4	2	4	4	4	4	4	4	4	2	4	4	4	2	2
2021-04-03	35	1	3	4	4	infirmiere	3	1	1		2	2	2	2	2	2	1	1	1	1	1	2	0	0	0	0	0	0	0	0	0	2	2	2	5	5	5	3	3	3	3	4	4	4	4	4	2	2	2
2021-04-01	50	1	1	4	4	medecin	9	3	2		1	1	2	2	2	2	1	1	1	1	1	1	0	1	1	0	1	0	0	0	0	3	3	3	5	5	5	3	3	2	2	2	2	2	4	4	4	2	2
2021-04-03	44	2	1	4	4	medecin	9	5	2	2	1	2	2	2	2	2	1	1	1	1	1	1	0	0	0	1	1	0	0	0	0	1	1	1	5	5	5	3	2	2	3	3	2	2	4	4	4	2	2
2021-06-30	41	1	1	4	5	infirmiere	7	6	2		2	1	1	2	2	2	1	1	2	2	2	1	0	0	1	1	1	0	0	0	0	4	4	4	4	4	4	4	3	2	4	4	2	2	4	4	4	2	2
2021-04-29	55	1	2	4	4	infirmiere	6	2	2		2	1	2	1	1	2	1	1	1	1	1	1	0	0	0	1	1	1	0	0	0	2	4	4	4	4	4	3	2	2	3	2	2	2	2	4	2	2	2
2021-03-25	27	1	2	4	4	medecin	7	4	2		2	2	2	2	2	2	1	1	1	1	1	1	0	0	0	1	1	1	0	0	0	2	4	4	4	4	4	4	3	2	4	2	2	2	3	4	4	2	2
2021-03-25	30	1	2	4	5	medecin	15	4	2		2	2	1	2	2	2	1	1	1	2	2	1	0	0	1	0	1	0	1	0	0	4	4	4	2	2	4	2	2	1	4	2	2	2	4	4	2	2	2
2021-06-02	42	2	3	4	5	medecin	2	2	2	2	2	2	1	1	1	1	1	1	1	1	1	1	0	0	0	1	1	0	1	0	0	4	4	4	4	4	2	3	2	2	2	3	1	1	4	3	2	2	2
2021-05-19	50	1	1	4	4	medecin	5	2	2		1	2	2	2	2	2	1	1	1	1	1	2	0	0	0	0	0	0	0	0	0	4	4	4	5	4	4	2	2	2	2	4	2	2	4	4	2	2	2
2021-04-02	50	2	1	4	3	medecin	5	4	2	2	1	2	2	2	2	2	1	2	1	1	1	2	0	0	0	0	0	0	0	0	0	4	4	4	4	5	4	4	4	2	3	4	2	2	4	4	1	1	2
2021-05-19	43	2	1	4	4	medecin	11	7	2	2	2	2	2	2	2	2	1	1	1	1	1	2	0	0	0	0	0	0	0	0	0	2	4	4	4	4	4	4	4	2	2	2	2	2	4	4	4	2	2
2021-05-27	35	1	1	4	4	medecin	11	6	2		2	2	1	2	2	2	2	1	2	2	2	1	0	0	0	1	1	0	0	0	1	2	2	2	4	4	4	4	4	4	4	4	4	2	4	4	2	2	2
2021-05-27	42	1	1	4	4	medecin	6	3	2		2	2	1	2	2	2	1	1	1	1	1	1	0	0	0	0	1	1	0	0	1	2	4	4	4	4	4	2	4	2	2	2	2	2	4	4	4	2	2
2021-06-04	50	1	1	4	4	medecin	5	2	2		2	2	2	2	2	2	1	1	1	1	1	1	0	1	1	0	1	0	0	0	0	4	2	4	4	4	2	4	2	2	4	2	2	2	4	4	4	2	2
2021-06-01	30	1	2	4	4	infirmiere	12	8	2		2	2	2	2	1	2	1	1	1	1	1	1	0	0	1	0	0	1	0	0	1	4	4	4	5	5	4	4	1	1	1	2	2	2	5	5	2	1	2
2021-06-30	35	2	1	4	4	sagef	8	4	2	2	2	2	2	2	2	2	1	1	1	1	1	1	0	0	1	0	1	0	1	0	0	2	4	4	4	4	2	4	4	4	4	4	2	2	4	4	4	4	2
2021-06-30	31	1	2	4	4	medecin	1	1	1		2	2	2	2	2	2	1	1	1	1	1	1	0	0	0	0	0	1	0	0	0	3	4	4	4	5	5	5	3	2	3	3	2	2	3	5	1	1	1
2021-05-07	20	2	2	4	5	medecin	10	2	2	2	2	2	2	2	2	2	2	2	2	2	2	1	0	0	0	1	0	0	0	0	0	2	4	2	4	2	4	4	4	2	4	4	4	4	4	4	2	4	2
2021-04-21	21	2	1	4	5	medecin	3	2	2	2	2	2	2	2	2	1	2	1	1	2	2	1	0	0	0	1	0	0	0	0	0	2	2	4	2	2	4	2	3	2	4	4	2	2	2	4	2	3	4
2021-04-14	27	1	2	4	4	medecin	5	3	2		2	2	2	2	2	2	1	1	1	1	1	1	0	0	0	1	0	0	0	0	0	4	4	4	4	5	4	4	4	3	4	4	2	2	4	2	2	2	4
2021-06-02	25	2	2	4	4	infirmiere	2	2	2	2	2	2	2	2	2	2	1	1	1	1	2	1	0	0	1	1	0	0	0	0	0	4	4	4	4	5	2	2	4	2	2	4	1	2	4	2	1	2	2
2021-04-27	37	2	1	4	4	infirmiere	4	3	2	2	2	2	1	2	1	1	1	1	1	2	2	1	0	0	1	1	0	0	0	0	0	2	2	2	4	4	4	2	4	2	2	4	2	2	4	4	4	2	2
2021-04-15	27	1	2	4	4	medecin	4	4	1		2	2	1	2	2	2	1	2	1	1	1	1	0	0	0	0	1	0	0	0	0	2	2	4	5	4	4	2	2	2	4	2	2	2	4	4	2	2	2
2021-05-07	22	2	2	4	5	infirmiere	7	2	2	2	2	2	2	2	1	2	2	1	1	1	1	1	1	1	0	0	1	0	0	0	0	2	4	2	4	4	2	2	2	2	2	4	2	2	4	5	2	2	2
2021-04-28	24	2	2	4	5	infirmiere	2	2	2	2	2	2	2	2	2	2	2	2	1	2	2	1	0	0	1	0	1	0	0	0	0	2	2	2	4	4	4	4	4	2	5	4	2	2	4	4	2	3	2
2021-04-20	27	1	2	4	4	medecin	2	2	2		2	2	2	2	2	2	2	1	1	1	1	1	0	0	1	0	1	0	0	0	0	4	4	4	5	4	2	2	2	2	4	4	2	2	4	4	2	2	2
2021-04-16	22	2	2	4	5	medecin	4	2	2	2	2	2	2	2	2	2	1	1	1	2	2	1	0	1	1	0	1	0	0	0	0	2	2	2	4	4	3	2	4	2	4	4	3	2	4	4	4	2	2
2021-05-18	26	1	2	4	5	medecin	3	2	2		2	2	2	2	2	2	2	1	2	2	2	1	0	0	0	1	1	0	0	0	0	4	4	4	4	4	4	5	4	2	2	4	4	4	4	4	2	2	2
2021-05-26	28	2	2	4	4	medecin	3	3	2	2	2	2	2	2	2	2	1	1	2	1	2	1	0	0	0	1	1	0	0	0	0	4	3	4	4	4	2	4	2	1	2	2	2	2	4	4	4	1	2
2021-05-06	29	2	2	4	4	medecin	1	1	2	2	2	2	2	2	2	2	1	1	1	2	2	1	0	1	0	1	1	0	0	0	0	4	4	4	4	4	4	2	2	2	2	2	2	2	2	2	4	3	2
2021-06-01	27	2	2	4	4	medecin	1	1	2	2	2	2	2	2	2	2	1	1	1	1	1	1	0	1	0	1	1	0	0	0	0	4	4	4	4	4	4	2	4	1	2	2	2	2	4	4	2	1	2
2021-06-07	26	2	2	4	4	medecin	1	1	2	2	2	2	2	2	2	2	1	1	1	1	1	1	0	1	0	1	1	0	0	0	0	4	4	4	4	4	4	2	2	1	2	2	2	2	1	2	2	2	2
2021-05-27	28	1	2	4	4	infirmiere	1	1	2		2	2	2	2	2	2	2	1	1	1	2	1	0	0	1	1	1	0	0	0	0	4	5	4	4	4	2	2	4	2	1	1	1	1	4	5	1	3	4
2021-05-27	31	1	2	4	4	medecin	2	2	2		2	2	2	2	1	2	1	1	1	1	2	1	0	0	1	1	1	0	0	0	0	4	4	4	5	4	4	2	1	1	2	2	2	2	1	1	3	3	3
2021-04-14	29	2	3	4	4	medecin	6	4	2	2	2	2	2	2	2	2	1	1	1	2	2	1	0	0	1	1	1	0	0	0	0	2	2	2	4	4	4	2	4	3	2	2	2	2	4	4	3	2	2
2021-05-18	22	1	2	4	5	medecin	10	6	2		2	2	2	2	2	2	1	1	1	1	1	1	0	0	1	1	1	0	0	0	0	4	4	4	4	4	4	4	2	2	4	4	2	2	4	4	2	2	2
2021-05-24	35	1	1	4	4	medecin	4	2	2		2	2	2	2	1	2	1	1	1	1	1	1	0	0	0	1	0	1	0	0	0	4	5	4	4	4	5	5	4	2	5	2	1	2	4	4	2	1	2
2021-04-28	32	1	2	4	4	medecin	4	4	1		2	2	1	1	2	2	1	1	1	1	1	1	0	1	0	1	0	1	0	0	0	4	4	4	4	4	4	2	2	2	2	2	2	2	4	4	4	3	2
2021-06-08	30	1	1	4	4	infirmiere	6	5	2		2	2	1	2	2	2	2	1	1	1	1	1	0	1	0	1	0	1	0	0	0	2	4	2	4	4	4	2	2	2	2	2	2	2	4	4	2	4	2
2021-05-18	25	2	2	4	4	medecin	1	1	2	2	2	2	2	1	1	2	1	1	1	1	1	1	0	0	0	0	1	1	0	0	0	4	4	4	4	4	4	4	4	2	4	2	2	2	3	3	2	3	4
2021-04-06	25	1	2	4	4	infirmiere	6	2	1		2	2	2	2	2	2	1	1	1	1	1	1	1	0	0	0	1	1	0	0	0	2	2	2	4	4	4	3	3	3	4	4	4	4	4	4	4	4	2
2021-05-20	35	2	1	4	5	infirmiere	8	5	2	1	1	1	1	2	2	2	1	1	1	1	2	1	0	0	1	0	1	1	0	0	0	4	4	4	4	4	4	4	4	2	4	2	2	2	4	4	4	2	2
2021-05-12	28	1	2	4	4	sagef	3	3	2		2	2	2	2	2	2	1	1	1	1	2	1	0	1	0	1	1	1	0	0	0	4	4	4	2	4	2	2	2	2	2	4	2	2	4	4	2	2	3
2021-03-31	35	2	2	4	5	biologiste	8	4	2	2	2	2	1	2	2	2	1	1	1	2	2	1	0	0	1	0	0	0	1	0	0	2	4	4	5	3	4	5	4	4	5	4	4	2	4	4	4	4	2
2021-04-01	27	2	1	4	5	infirmiere	3	2	1	1	2	2	2	2	2	2	2	1	1	2	2	1	0	1	1	0	0	0	1	0	0	2	4	4	4	4	4	4	4	2	4	4	3	4	4	4	4	2	4
2021-03-24	23	2	1	4	5	medecin	5	4	2	1	2	2	1	2	2	2	1	1	2	1	1	1	0	1	0	1	0	0	1	0	0	4	4	4	4	5	4	5	4	4	5	4	4	4	4	5	4	1	2
2021-03-26	35	2	1	4	4	medecin	6	2	2	2	2	2	1	2	2	2	1	1	1	1	2	1	0	0	1	0	1	0	1	0	0	4	4	4	2	4	4	2	2	2	2	4	2	2	3	3	4	2	2
2021-03-25	33	2	1	4	5	infirmiere	4	2	2	2	2	2	2	2	2	2	1	1	1	2	2	1	0	0	1	0	1	0	1	0	0	4	5	4	4	4	4	5	4	2	5	2	2	2	4	4	4	4	2
2021-03-31	62	2	1	4	4	medecin	6	4	2	2	2	1	2	2	2	2	1	1	1	2	1	1	0	0	1	0	1	0	1	0	0	4	4	4	4	4	5	4	4	3	4	4	2	2	3	3	4	2	2
2021-05-31	28	2	2	4	4	medecin	1	1	2	2	2	2	2	2	2	2	2	2	1	1	2	1	0	0	0	1	1	0	1	0	0	4	4	4	4	4	4	1	1	1	1	1	1	2	4	4	1	2	2
2021-05-24	21	2	1	4	5	stagiaire	6	3	2	2	2	2	2	2	2	2	1	1	1	2	2	1	0	0	0	1	1	0	1	0	0	4	2	5	4	4	4	5	4	2	5	4	4	4	5	4	1	1	1
2021-05-31	26	1	2	4	4	medecin	3	3	2		2	2	1	2	2	2	1	1	1	1	2	1	0	0	0	1	1	0	1	0	0	4	2	4	4	4	4	2	2	1	2	4	2	2	4	4	2	1	2
2021-06-01	24	2	2	4	4	medecin	3	3	2	2	2	2	2	2	2	2	1	1	1	1	1	1	0	0	0	1	1	0	1	0	0	4	4	4	4	4	2	2	2	1	4	2	2	2	4	4	1	2	3
2021-06-01	23	2	2	4	4	infirmiere	3	3	2	2	2	2	2	2	2	2	1	1	1	1	1	1	0	0	0	1	1	0	1	0	0	4	4	4	4	5	2	2	2	2	1	1	1	1	1	1	1	1	3
2021-04-13	33	1	1	4	4	infirmiere	8	2	2		2	2	1	2	2	2	1	1	1	1	1	1	0	1	0	1	1	1	1	0	0	4	4	4	4	4	4	4	2	2	2	3	2	2	4	4	4	2	2
2021-04-27	32	2	1	4	4	medecin	3	3	2	2	2	2	2	2	2	1	1	1	1	1	1	1	0	1	0	0	1	0	0	1	0	2	2	2	4	4	4	2	2	2	2	4	2	2	4	4	4	2	4
2021-05-07	22	1	2	4	5	medecin	5	5	1		2	2	2	2	2	2	2	1	2	2	2	1	0	0	1	0	0	0	0	0	1	2	2	4	4	4	4	5	4	2	2	4	2	2	4	4	2	3	4
2021-04-30	24	1	2	4	5	medecin	6	3	2		2	2	2	2	2	2	1	1	1	2	2	1	0	0	0	1	0	0	0	0	1	2	2	2	2	4	4	2	2	2	2	4	2	2	4	4	3	3	2
2021-05-18	27	1	2	4	4	medecin	4	4	2		2	2	2	2	2	2	1	1	1	1	1	1	0	0	0	1	0	0	0	0	1	4	4	4	4	4	4	2	4	2	4	2	2	2	4	4	2	2	2
2021-05-28	28	2	2	4	4	medecin	1	1	2	2	2	2	2	2	2	2	1	1	1	1	1	1	0	1	0	1	0	0	0	0	1	4	2	2	4	4	4	2	4	2	4	2	2	1	4	4	2	2	2
2021-06-01	27	1	3	4	4	medecin	1	1	2		2	2	2	2	1	1	1	1	1	1	1	1	0	1	0	1	0	0	0	0	1	4	4	4	5	4	4	2	1	1	4	4	1	1	5	4	2	1	2
2021-05-18	40	1	2	4	4	medecin	4	4	2		2	2	2	2	2	2	2	2	2	1	1	1	0	1	0	1	0	0	0	0	1	4	4	4	4	2	4	5	2	2	2	4	2	2	4	4	2	2	2
2021-06-01	31	1	2	4	4	medecin	1	1	2		2	2	2	2	2	2	2	1	1	2	2	1	0	0	1	1	0	0	0	0	1	4	4	4	4	5	2	2	2	2	1	4	1	1	4	4	2	2	2
2021-05-26	27	1	2	4	4	medecin	2	2	2		2	2	2	1	2	2	1	1	1	1	1	1	0	0	1	1	0	0	0	0	1	4	4	4	4	4	2	2	2	2	1	2	1	1	4	2	2	1	3
2021-04-20	28	1	2	4	4	medecin	1	1	2		2	2	2	2	1	1	1	1	2	1	2	1	0	0	0	0	1	0	0	0	1	4	4	4	4	4	2	2	2	2	2	4	2	2	4	4	4	4	2
2021-04-15	30	1	2	4	4	medecin	4	4	2		2	2	2	2	1	2	1	1	1	1	1	1	0	0	0	0	1	0	0	0	1	4	4	4	2	4	2	4	2	2	4	4	2	2	4	4	2	2	4
2021-04-15	29	1	2	4	4	medecin	10	6	2		2	2	2	2	2	2	1	2	1	1	1	1	0	0	0	0	1	0	0	0	1	4	4	4	4	4	4	2	2	2	2	2	2	2	4	4	4	3	4
2021-05-26	27	1	2	4	4	ats	2	2	2		2	2	2	2	1	2	1	1	1	1	2	1	0	0	0	1	1	0	0	0	1	2	1	4	2	2	4	1	4	1	1	2	1	1	2	4	5	2	1
2021-06-01	27	2	2	4	4	medecin	2	2	2	2	2	2	2	2	1	2	2	2	1	1	1	1	0	0	0	1	1	0	0	0	1	4	4	4	5	5	2	2	2	2	2	2	2	2	4	2	1	2	1
2021-06-01	26	2	2	4	4	medecin	2	2	2	2	2	2	2	2	2	2	1	1	1	1	1	1	0	0	0	1	1	0	0	0	1	4	2	4	4	4	2	5	4	3	4	4	1	2	4	4	4	1	2
2021-03-25	32	2	1	4	5	stagiaire	5	2	2	2	2	2	2	2	2	2	1	1	1	2	2	1	0	0	1	0	0	0	1	0	1	4	4	4	4	4	4	5	2	3	5	4	4	3	4	4	4	2	2
2021-06-09	28	1	2	4	4	stagiaire	1	1	2		2	2	2	2	1	2	1	1	1	1	2	1	0	0	0	1	0	0	1	0	1	2	2	2	4	4	2	2	2	1	2	2	1	1	1	1	4	3	3
2021-06-02	27	1	2	4	4	medecin	1	1	2		2	2	2	2	1	2	1	2	1	1	1	1	0	0	0	1	0	0	1	0	1	2	4	4	4	4	4	2	2	2	2	2	2	2	4	4	2	2	2
2021-03-24	25	1	2	4	4	medecin	8	3	2		2	2	2	2	1	2	1	1	1	1	1	1	0	0	0	0	1	0	1	0	1	2	4	4	3	4	4	5	2	2	5	4	2	2	4	4	3	2	2
2021-03-25	21	1	2	4	5	medecin	4	4	2		2	2	2	1	2	2	1	1	1	2	2	1	0	0	0	0	1	0	1	0	1	4	2	4	4	5	4	2	2	2	4	2	2	2	4	4	2	2	2
2021-04-21	28	1	2	4	4	medecin	1	1	2		2	2	2	2	1	2	1	1	1	1	1	2	0	0	0	0	0	0	0	0	0	2	2	2	5	4	4	4	2	2	4	3	2	2	4	4	2	2	2
2021-06-02	22	2	2	4	4	sagef	1	1	2	2	2	2	1	2	1	2	1	1	1	1	2	2	0	0	0	0	0	0	0	0	0	2	2	2	4	2	4	1	2	2	1	2	2	2	4	2	2	3	2
2021-04-01	24	1	2	4	4	infirmiere	2	2	2		2	2	2	2	2	2	2	1	2	1	1	2	0	0	0	0	0	0	0	0	0	2	2	2	5	2	3	3	3	2	2	3	2	2	4	4	2	2	3
2021-04-23	28	1	1	4	4	infirmiere	3	2	2		2	1	1	2	1	2	1	1	1	1	2	2	0	0	0	0	0	0	0	0	0	2	4	4	4	4	4	5	4	2	4	4	2	4	3	3	2	2	2
2021-04-13	22	2	4	4	5	medecin	5	2	2	2	2	2	2	2	2	2	2	1	1	2	1	2	0	0	0	0	0	0	0	0	0	4	4	4	4	3	4	5	4	2	2	4	4	3	4	4	2	3	2
2021-04-20	26	2	2	4	5	medecin	4	3	1	2	2	2	1	2	2	2	2	2	2	2	2	2	0	0	0	0	0	0	0	0	0	2	4	2	4	2	4	5	4	2	4	3	4	4	4	4	2	3	3
2021-05-26	22	2	2	4	5	infirmiere	7	5	2	2	2	2	2	2	2	2	2	1	1	1	1	2	0	0	0	0	0	0	0	0	0	2	2	4	4	4	4	4	4	2	2	2	2	2	4	5	1	1	4
2021-04-14	25	1	2	4	4	medecin	13	10	2		2	2	2	2	2	2	1	1	2	1	2	2	0	0	0	0	0	0	0	0	0	2	2	2	4	4	4	2	2	2	2	4	2	2	4	4	2	3	2
2021-06-05	29	1	2	5	4	medecin	2	2	1		2	2	2	2	2	2	1	1	1	1	1	2	0	0	0	0	0	0	0	0	0	2	2	2	4	4	2	2	2	2	2	2	2	2	4	4	2	2	2
2021-05-31	23	1	2	5	5	sagef	3	3	2		2	2	2	2	2	2	1	1	2	1	1	1	1	0	0	0	1	1	0	0	0	4	4	2	4	4	4	2	2	4	4	4	4	4	4	4	4	2	2
2021-03-31	23	2	1	5	4	infirmiere	5	2	2	2	2	1	2	2	2	2	1	1	1	1	1	1	0	1	0	0	0	0	1	0	0	2	2	2	5	4	5	4	4	2	4	4	2	2	4	4	4	2	2
2021-05-28	29	1	2	5	4	medecin	8	6	2		2	2	2	2	2	2	1	1	1	1	1	1	0	0	1	0	0	1	1	0	0	4	4	4	4	4	4	4	4	4	4	4	4	2	4	4	4	2	4
2021-03-31	25	1	3	5	5	medecin	5	1	2		2	2	2	2	2	2	1	1	2	1	1	2	0	0	0	0	0	0	0	0	0	2	4	4	4	2	4	3	4	2	4	4	4	2	4	4	2	2	2
2021-06-02	25	2	2	5	5	sagef	2	2	1	2	2	2	2	2	2	2	1	1	1	1	1	2	0	0	0	0	0	0	0	0	0	4	4	4	4	4	4	4	2	2	4	4	4	4	4	4	4	2	2
2021-05-26	36	1	1	5	4	infirmiere	4	1	2		2	2	2	2	2	2	1	1	1	1	1	1	0	0	0	1	0	1	1	0	0	4	4	4	4	4	4	4	4	2	1	4	4	4	4	4	4	2	2
2021-05-24	25	1	2	5	5	infirmiere	3	3	2		2	2	2	2	2	2	1	1	1	1	1	1	1	1	0	1	0	0	0	0	0	2	2	2	5	4	4	4	4	2	4	2	2	2	4	4	4	2	2
2021-05-18	30	2	1	5	5	infirmiere	4	4	2	2	2	2	2	2	2	2	1	1	1	1	1	1	0	1	0	1	1	0	0	0	0	4	4	4	5	5	5	4	2	2	4	4	2	1	3	3	4	2	2
2021-05-24	24	2	1	5	5	infirmiere	2	2	1	2	2	2	2	2	2	2	1	1	1	1	1	1	0	0	1	1	1	0	0	0	0	4	4	4	5	5	5	5	4	2	3	4	2	2	4	4	4	4	2
2021-06-05	24	1	2	5	5	sagef	6	2	2		2	2	1	2	1	2	1	2	1	2	2	2	0	0	0	0	0	0	0	0	0	4	4	4	2	4	2	4	4	2	4	4	2	2	3	4	4	2	2
2021-05-24	25	1	2	5	5	medecin	10	4	1		2	2	1	2	1	2	1	1	1	1	1	2	0	0	0	0	0	0	0	0	0	2	2	2	2	2	2	4	2	2	4	4	2	2	4	4	2	2	2
2021-05-21	29	2	2	5	5	infirmiere	5	5	2	2	2	2	2	2	2	2	1	1	1	1	1	2	0	0	0	0	0	0	0	0	0	4	4	4	4	4	4	4	4	2	2	3	2	2	4	4	1	2	2
2021-05-24	26	2	1	5	5	infirmiere	2	2	2	2	2	2	2	2	2	2	1	1	1	1	1	1	0	0	0	1	1	0	0	0	0	4	4	4	4	4	4	5	4	2	4	4	4	2	4	4	4	2	4
2021-05-21	36	2	1	5	4	infirmiere	18	7	2	1	2	2	2	2	2	2	1	1	1	1	1	1	0	0	1	1	0	1	0	0	0	2	4	4	5	4	4	4	2	2	4	2	2	2	2	3	4	2	2
2021-05-20	39	1	1	5	5	infirmiere	6	2	2		2	2	1	2	1	1	1	1	1	1	1	2	0	0	0	0	0	0	0	0	0	1	1	1	5	5	5	2	2	1	3	2	1	1	4	4	2	2	2
2021-05-28	22	2	2	5	5	sagef	7	2	2	2	2	2	2	2	2	2	1	1	1	1	1	2	0	0	0	0	0	0	0	0	0	2	2	2	4	4	4	5	4	4	4	4	4	4	4	4	4	2	2
2021-06-05	32	1	1	5	5	infirmiere	3	2	2		2	2	1	1	1	2	1	1	1	1	1	2	0	0	0	0	0	0	0	0	0	4	4	4	4	4	4	4	4	2	2	4	2	2	4	4	4	4	2
2021-05-19	22	2	2	5	4	infirmiere	4	2	2	2	2	2	2	2	2	2	1	1	1	1	1	1	0	0	0	1	1	1	0	0	0	4	4	4	4	4	4	4	2	2	1	4	1	2	4	4	4	2	2
2021-04-01	33	2	3	5	5	infirmiere	5	5	1	2	2	2	2	2	2	2	1	1	1	1	1	1	0	0	0	0	0	0	1	1	0	3	2	4	5	4	4	3	2	2	2	4	2	2	4	4	4	2	2
2021-05-29	33	2	1	5	5	medecin	19	7	2	2	2	2	2	2	2	2	1	2	1	1	1	1	0	0	0	0	0	1	1	1	0	4	4	4	4	4	4	4	4	2	2	4	1	1	5	5	4	2	2
2021-04-08	22	2	2	5	5	infirmiere	7	3	2	2	2	2	1	2	1	2	1	1	1	1	1	2	0	0	0	0	0	0	0	0	0	2	2	2	4	2	2	4	4	4	4	4	4	2	4	4	2	2	2
2021-05-18	22	2	1	5	5	medecin	5	3	2	1	2	2	1	2	1	2	1	1	1	2	2	2	0	0	0	0	0	0	0	0	0	4	4	4	4	4	4	5	3	1	2	3	3	2	4	4	4	2	2
2021-05-28	29	2	1	5	4	infirmiere	5	5	1	2	2	2	2	2	2	2	1	1	1	1	1	1	1	1	1	0	0	0	0	0	0	4	4	4	4	4	4	4	4	2	4	4	4	4	4	4	4	2	2
2021-04-01	28	1	2	5	5	sagef	6	2	2		2	2	2	2	1	2	1	1	1	1	1	1	0	1	0	1	1	0	0	0	0	2	3	3	5	5	5	3	2	2	3	3	2	2	3	3	4	2	2
2021-04-02	29	1	2	5	4	infirmiere	5	1	2		2	2	2	2	2	2	1	1	1	1	2	2	0	0	0	0	0	0	0	0	0	1	2	2	4	4	4	5	5	5	5	4	4	4	4	4	2	2	2
2021-06-05	37	2	1	5	5	infirmiere	6	2	2	2	2	2	1	2	2	2	1	1	1	1	1	2	0	0	0	0	0	0	0	0	0	4	4	4	4	4	2	2	4	2	4	4	4	4	4	4	2	4	2
2021-04-01	36	2	1	5	5	medecin	7	4	2	2	2	2	2	2	2	2	1	1	1	1	2	2	0	0	0	0	0	0	0	0	0	4	3	4	4	4	4	3	3	2	3	4	4	2	4	4	4	2	2
2021-06-04	23	2	2	5	5	medecin	6	6	2	2	2	2	1	2	1	2	1	1	1	1	1	1	0	0	1	1	1	0	0	0	0	4	2	4	4	4	4	2	2	2	4	2	2	4	4	4	4	4	2
2021-04-03	29	2	2	5	5	medecin	2	2	2	2	2	2	2	2	2	2	1	1	1	1	1	2	0	0	0	0	0	0	0	0	0	2	2	4	5	5	4	5	4	3	3	4	5	3	4	4	4	2	2
2021-06-05	43	2	1	5	4	medecin	6	3	2	2	2	2	2	2	2	2	1	1	1	1	1	2	0	0	0	0	0	0	0	0	0	4	4	4	3	2	2	2	2	2	2	4	4	2	4	4	4	2	2
2021-04-29	52	2	1	5	4	ats	6	3	2	2	2	2	2	2	2	2	1	1	1	2	2	1	0	1	1	0	1	0	0	0	0	1	1	1	4	4	4	5	5	5	3	3	4	4	4	4	2	2	2
2021-05-21	32	2	2	5	4	infirmiere	3	3	2	2	2	2	1	2	1	2	1	1	1	1	1	1	0	0	0	1	1	1	0	0	0	2	2	2	4	4	4	4	2	2	4	4	2	2	4	4	4	4	4
2021-05-26	47	1	1	5	4	medecin	5	2	2		2	2	2	2	2	2	1	1	1	1	1	1	0	0	1	1	0	0	1	0	0	4	4	4	4	4	4	4	4	2	2	4	2	2	4	4	4	4	4
2021-06-05	35	1	2	5	5	medecin	4	2	2		2	2	2	2	1	1	1	1	1	2	2	2	0	0	0	0	0	0	0	0	0	4	4	4	4	4	4	4	4	2	2	4	2	2	4	4	2	2	2
2021-06-04	26	1	2	5	5	sagef	2	2	2		2	2	2	2	2	2	1	1	1	1	1	2	0	0	0	0	0	0	0	0	0	2	4	4	2	4	2	4	2	2	4	4	2	2	4	4	4	2	4
2021-04-07	32	2	3	5	4	medecin	2	2	2	1	2	2	1	2	2	2	1	1	1	1	1	2	0	0	0	0	0	0	0	0	0	4	4	4	4	4	4	4	2	2	5	4	2	2	5	5	4	2	2
2021-04-28	41	1	1	5	4	infirmiere	4	2	2		2	2	2	2	2	2	1	1	2	2	2	2	0	0	0	0	0	0	0	0	0	4	4	4	4	4	4	5	4	4	3	3	3	2	4	4	2	2	4
2021-05-18	52	2	1	5	4	infirmiere	6	3	2	2	2	2	2	2	2	2	1	1	1	2	2	2	0	0	0	0	0	0	0	0	0	1	1	1	4	4	4	4	5	5	5	5	3	3	4	4	4	3	2
2021-04-01	35	1	1	5	4	medecin	4	4	2		2	2	2	2	2	2	1	1	1	1	2	2	0	0	0	0	0	0	0	0	0	1	1	3	4	4	4	3	2	2	3	3	2	2	4	4	2	2	2
2021-06-04	24	2	1	5	5	medecin	14	8	2	2	2	2	2	2	2	2	1	1	1	1	2	2	0	0	0	0	0	0	0	0	0	4	4	4	4	4	4	4	4	4	4	4	4	4	4	4	2	2	2
2021-04-20	60	2	1	5	5	sagef	7	2	2	2	2	2	2	2	1	1	2	2	2	2	2	2	0	0	0	0	0	0	0	0	0	2	2	2	4	3	3	4	4	4	4	4	2	2	4	2	4	2	2
2021-05-26	51	2	4	5	4	infirmiere	4	4	2	2	1	2	2	2	2	2	1	1	1	1	1	1	0	0	0	0	1	1	0	1	0	4	4	4	4	4	4	4	2	2	4	4	4	4	4	4	4	2	2
2021-06-04	26	1	2	5	4	infirmiere	4	4	2		2	2	1	2	2	2	1	1	1	1	1	2	0	0	0	0	0	0	0	0	0	4	4	2	4	4	2	2	2	2	2	2	1	1	4	3	4	2	2
2021-04-19	45	2	1	5	5	medecin	8	2	2	2	2	2	2	2	2	2	1	1	1	1	1	1	1	1	0	1	0	0	0	0	0	4	4	4	5	5	4	3	2	2	3	3	2	2	5	5	2	2	2
2021-06-05	40	2	1	5	5	medecin	4	1	2	2	2	2	2	1	2	1	1	1	1	1	1	1	0	1	0	1	1	0	0	0	0	4	4	4	4	4	4	2	2	2	3	4	2	2	4	4	2	2	2
2021-05-19	47	2	1	5	5	medecin	6	4	2	2	2	2	2	2	2	2	1	1	1	1	2	1	0	0	0	1	1	1	0	0	0	2	2	4	4	4	4	4	4	2	4	4	4	2	4	4	2	2	2
2021-04-01	41	1	1	5	4	medecin	5	4	2		2	1	1	2	2	2	1	1	1	1	1	1	0	0	1	0	1	0	1	0	0	1	1	3	2	4	4	4	3	2	3	2	3	2	4	4	3	2	2
2021-04-23	32	1	1	5	4	infirmiere	3	2	2		2	2	2	2	1	2	1	1	1	1	2	2	0	0	0	0	0	0	0	0	0	2	2	2	4	4	4	4	4	2	4	4	4	2	4	4	2	2	2
2021-06-05	50	1	3	5	4	medecin	5	5	2		1	2	1	2	2	2	1	1	1	1	1	2	0	0	0	0	0	0	0	0	0	2	4	4	4	2	2	3	2	2	2	4	2	2	4	4	4	2	2
2021-04-03	53	1	1	5	4	infirmiere	10	6	2		2	2	2	2	2	2	1	1	1	1	1	1	1	0	1	0	0	0	0	0	0	2	2	4	4	4	4	4	2	2	2	4	4	4	4	4	4	2	2
2021-04-14	65	1	1	5	4	medecin	10	2	2		2	1	2	2	2	2	1	1	1	1	1	1	0	1	0	1	0	0	0	0	0	4	4	4	4	4	5	3	3	2	2	4	2	2	4	4	4	2	2
2021-06-04	35	1	2	5	4	medecin	6	4	2		2	2	2	2	2	2	1	1	1	1	1	1	1	0	0	1	1	0	0	0	0	4	4	2	5	4	5	2	1	1	1	2	2	1	4	4	2	4	2
2021-06-05	63	2	4	5	5	medecin	3	3	2	2	1	2	2	2	2	1	1	1	1	1	1	2	0	0	0	0	0	0	0	0	0	4	4	2	2	4	4	2	2	2	4	4	2	2	4	4	4	2	2
2021-06-05	46	1	1	5	4	medecin	4	2	2		2	2	1	2	1	2	1	1	1	1	1	1	0	0	0	1	1	1	0	0	0	4	4	4	4	4	2	2	2	2	2	3	2	2	5	5	4	2	2
2021-06-04	38	1	2	5	4	para	7	4	2		2	2	2	1	1	2	1	1	1	1	1	2	0	0	0	0	0	0	0	0	0	4	4	4	4	4	4	4	4	2	2	4	2	4	4	4	4	4	2
2021-06-04	50	1	1	5	4	medecin	2	2	2		2	2	2	2	2	2	1	1	1	1	1	1	0	1	0	1	1	0	0	0	0	4	4	4	4	5	4	2	2	2	4	4	2	2	4	4	2	2	2
2021-05-26	35	1	1	5	4	infirmiere	6	2	2		2	2	2	2	2	2	1	1	1	1	1	2	0	0	0	0	0	0	0	0	0	4	2	2	4	4	4	3	3	1	3	4	1	1	4	4	4	4	2
2021-03-31	60	2	4	5	5	infirmiere	10	5	2	2	2	2	2	2	2	2	2	1	2	2	2	1	0	0	1	0	0	0	0	0	0	2	5	2	4	4	4	5	4	3	4	2	4	2	4	4	2	2	2
2021-04-07	39	1	3	5	4	infirmiere	3	2	2		2	2	2	2	2	2	1	1	1	1	2	1	1	0	0	1	0	0	0	0	0	2	2	4	4	4	4	3	4	2	4	3	2	2	4	4	4	2	2
2021-03-31	25	2	2	5	5	biologiste	5	3	2	2	2	2	2	2	2	2	1	1	1	1	2	1	0	1	0	1	0	0	1	0	0	4	2	2	4	4	4	5	4	4	4	4	4	4	4	4	4	2	2
2021-04-02	24	1	2	5	5	infirmiere	2	2	1		2	2	2	2	2	2	1	1	1	1	1	2	0	0	0	0	0	0	0	0	0	2	1	2	4	4	4	4	4	3	3	4	2	2	4	4	4	2	2
2021-04-08	30	1	1	6	5	medecin	1	1	2		2	2	2	2	2	2	1	1	1	1	1	1	0	1	1	1	0	0	0	0	0	2	2	2	4	4	4	4	4	4	4	4	4	4	4	4	4	2	2
2021-06-22	29	1	1	6	5	infirmiere	3	2	2		2	2	2	2	2	2	1	1	1	1	2	1	0	0	0	0	1	0	0	0	0	2	2	2	4	4	4	2	2	2	2	4	1	2	4	4	2	3	2
2021-04-29	23	2	2	6	5	biolog	5	3	2	2	2	2	1	2	2	2	1	1	1	2	2	1	0	0	0	0	1	0	0	0	0	4	4	4	4	4	4	4	4	3	4	5	2	2	4	4	4	2	2
2021-06-01	25	2	1	6	5	infirmiere	7	4	2	2	2	2	1	2	1	2	1	2	1	1	1	1	0	0	0	0	1	0	0	0	0	1	1	1	5	5	5	3	3	3	5	3	1	1	5	5	1	4	4
2021-06-10	26	2	2	6	5	infirmiere	8	6	2	2	2	2	2	2	2	2	2	2	1	2	2	1	0	0	0	0	1	0	0	0	0	4	4	3	4	2	3	4	2	2	4	3	3	3	4	4	4	2	2
2021-06-10	28	2	1	6	4	infirmiere	7	2	2	2	2	2	2	2	1	2	1	1	1	2	2	1	0	1	0	0	1	0	0	0	0	4	3	3	4	4	4	5	4	4	4	4	4	3	4	4	4	3	4
2021-04-07	26	1	2	6	5	infirmiere	6	4	2		2	2	1	2	2	2	1	2	1	2	2	1	0	1	0	1	1	0	0	0	0	2	3	2	5	4	3	4	3	2	2	2	2	2	4	4	4	2	3
2021-06-05	20	1	2	6	5	pharma	2	2	1		2	2	2	2	2	2	1	1	1	1	1	1	0	0	1	1	1	0	0	0	0	4	4	4	4	4	4	2	4	2	2	4	4	4	4	4	2	2	2
2021-06-22	27	2	1	6	3	infirmiere	7	4	2	2	2	2	2	2	2	2	1	1	1	1	2	1	1	0	0	0	1	0	1	0	0	4	4	4	4	4	4	4	4	4	4	4	4	4	4	4	2	2	2
2021-06-24	25	1	2	6	5	medecin	1	1	1		2	2	2	1	1	1	2	2	1	2	2	1	0	0	0	0	0	0	0	1	0	2	2	2	4	4	4	4	4	3	3	4	4	3	4	4	4	3	2
2021-06-12	27	1	2	6	4	infirmiere	20	10	2		2	2	2	2	2	2	1	1	1	1	1	1	0	0	0	0	0	0	0	1	0	4	4	4	4	4	3	3	4	3	4	4	3	3	4	4	4	3	2
2021-06-10	26	2	1	6	3	pharma	1	1	2	2	2	2	2	2	1	1	1	1	2	2	2	1	0	0	1	0	1	0	0	1	0	4	4	4	5	2	4	5	4	4	4	4	4	4	4	4	4	2	2
2021-06-11	30	1	1	6	4	stagiaire	4	2	1		2	2	2	2	2	2	1	2	1	2	2	1	1	1	1	1	1	1	1	1	1	2	2	2	4	4	4	4	4	4	4	4	4	2	4	4	4	2	2
2021-06-10	21	1	2	6	4	infirmiere	1	1	2		2	2	2	2	2	2	1	1	1	2	2	2	0	0	0	0	0	0	0	0	0	2	2	2	4	4	4	2	2	2	3	2	2	2	4	4	4	3	2
2021-06-11	39	2	1	6	4	infirmiere	3	1	2	2	2	2	2	2	2	2	1	2	1	2	2	2	0	0	0	0	0	0	0	0	0	4	4	4	4	3	4	4	4	3	4	3	3	3	4	4	3	3	3
2021-06-10	22	2	2	6	4	infirmiere	5	1	2	2	2	2	2	2	2	2	1	1	1	2	2	2	0	0	0	0	0	0	0	0	0	4	3	3	4	4	4	4	4	3	4	4	4	4	4	4	2	3	4
2021-06-11	23	1	2	6	1	infirmiere	2	2	1		2	2	2	2	2	2	2	2	1	2	2	2	0	0	0	0	0	0	0	0	0	2	2	2	4	4	4	4	3	3	4	2	2	2	4	4	4	3	2
2021-05-26	25	1	2	6	5	infirmiere	3	2	2		2	2	2	2	2	2	1	1	2	1	2	2	0	0	0	0	0	0	0	0	0	1	1	1	1	4	4	2	1	1	1	4	1	1	4	4	4	2	2
2021-06-16	25	2	2	6	5	stagiaire	3	3	2	2	2	2	1	2	2	2	1	1	1	2	2	2	0	0	0	0	0	0	0	0	0	2	2	2	4	4	4	4	3	3	4	4	2	3	4	4	2	3	2
2021-06-11	25	1	2	6	5	para	3	3	2		2	2	2	2	2	2	2	2	2	1	2	2	0	0	0	0	0	0	0	0	0	2	2	2	2	4	4	4	4	3	4	2	3	3	4	4	3	3	2
2021-06-04	29	2	1	6	5	pharma	6	3	2	2	2	2	2	2	2	2	1	1	1	1	2	2	0	0	0	0	0	0	0	0	0	4	4	4	4	4	4	4	2	2	4	4	4	2	4	4	4	2	2
2021-06-17	21	2	1	6	5	medecin	3	3	1	2	2	2	2	2	1	1	1	1	1	1	1	2	0	0	0	0	0	0	0	0	0	2	2	2	4	4	4	4	4	4	4	4	4	4	4	4	4	2	2
2021-06-11	49	2	1	6	5	ats	9	4	2	2	2	2	1	2	2	2	2	2	2	2	2	2	0	0	0	0	0	0	0	0	0	2	2	2	4	4	4	4	3	3	4	3	3	3	4	4	2	3	2
2021-06-11	20	1	3	6	4	sagef	10	4	2		2	2	2	2	2	2	2	2	1	1	2	2	0	0	0	0	0	0	0	0	0	4	4	4	4	4	4	4	3	3	3	3	3	3	4	4	2	3	2
2021-06-11	28	1	2	6	4	pharma	10	6	2		2	2	2	2	2	2	1	2	1	1	1	1	0	0	1	0	0	0	0	0	0	4	4	4	4	4	4	2	4	3	4	4	3	3	4	4	2	2	2
2021-06-22	38	2	2	6	5	biologiste	7	4	2	2	2	2	1	2	2	2	1	1	1	1	2	1	0	0	1	0	1	0	0	1	0	4	4	4	5	2	4	4	5	2	4	4	4	2	4	4	2	2	2
2021-06-08	20	2	2	6	5	infirmiere	9	3	2	2	2	2	2	2	2	1	1	1	1	1	2	1	0	0	1	1	1	0	0	0	0	4	4	4	4	4	4	4	4	4	4	4	4	4	4	4	2	2	2
2021-06-11	25	1	2	6	4	sagef	9	4	2		2	2	2	2	1	2	1	1	1	2	2	2	0	0	0	0	0	0	0	0	0	2	2	2	4	4	4	4	4	2	4	4	2	4	4	4	4	2	2
2021-06-22	38	2	1	6	4	infirmiere	10	5	2	2	2	2	2	2	2	2	1	1	1	2	2	2	0	0	0	0	0	0	0	0	0	2	2	2	4	3	2	4	2	2	4	2	2	2	4	4	2	2	2
2021-06-24	22	2	2	6	3	medecin	10	2	2	2	2	2	2	2	2	2	1	1	1	2	2	1	0	0	1	0	0	0	0	0	0	2	4	2	4	4	5	2	2	2	2	2	2	2	4	4	2	2	4
2021-03-30	36	2	1	6	5	infirmiere	10	2	2	2	2	1	2	2	2	1	2	1	1	1	1	1	1	1	1	1	0	0	0	0	0	4	4	4	5	4	4	5	5	4	5	5	4	4	4	4	2	2	4
2021-06-22	21	1	2	6	3	biolog	18	3	1		2	2	2	2	2	2	1	1	1	1	1	1	0	0	0	0	1	0	0	0	0	2	2	2	4	4	4	5	4	4	4	4	4	4	4	4	4	2	2
2021-06-23	28	1	1	6	4	medecin	4	2	1		2	2	2	2	2	2	2	1	2	2	2	1	1	0	1	0	1	0	0	0	0	2	4	4	4	4	4	4	3	2	4	4	2	2	4	4	2	2	2
2021-06-10	22	1	2	6	4	infirmiere	5	4	2		2	2	1	2	2	2	1	1	1	1	2	1	1	0	1	0	1	0	0	0	0	4	5	4	5	4	4	4	2	2	4	5	2	2	4	4	2	2	2
2021-06-07	28	1	2	6	4	infirmiere	12	7	2		2	2	2	2	1	2	1	2	1	2	1	1	0	1	1	0	1	0	0	0	0	2	2	3	4	4	4	4	2	2	4	2	2	2	4	4	2	2	2
2021-05-31	28	2	1	6	4	infirmiere	4	2	2	2	2	2	1	2	2	2	1	2	1	1	1	1	0	0	1	1	1	0	0	0	0	4	4	2	4	4	4	2	2	2	4	4	2	2	3	3	2	2	4
2021-06-10	18	2	1	6	5	infirmiere	3	1	2	2	2	2	2	2	2	2	2	2	1	2	2	1	1	0	1	0	0	0	0	1	0	4	4	4	4	4	4	4	4	2	4	2	4	2	4	4	2	2	2
2021-06-11	25	2	2	6	5	stagiaire	6	2	2	2	2	2	2	2	2	2	2	2	1	2	2	2	0	0	0	0	0	0	0	0	0	2	2	2	4	2	4	4	4	3	3	4	3	3	4	4	2	3	2
2021-06-24	23	2	1	6	5	medecin	3	2	1	1	2	2	2	2	2	2	1	2	1	2	2	2	0	0	0	0	0	0	0	0	0	4	4	4	4	4	4	4	3	3	3	4	3	3	4	4	4	2	2
2021-06-16	23	1	2	6	5	stagiaire	11	5	2		2	2	2	2	1	2	1	1	1	1	1	2	0	0	0	0	0	0	0	0	0	4	4	4	5	4	4	4	4	3	4	4	2	3	4	4	2	3	4
2021-06-17	24	2	2	6	3	para	7	5	2	2	2	2	2	2	2	2	1	1	2	2	2	2	0	0	0	0	0	0	0	0	0	2	2	2	4	2	2	5	4	2	4	4	2	2	4	4	4	2	2
2021-06-11	41	1	1	6	4	ats	3	3	1		2	2	2	2	2	2	1	2	1	2	2	2	0	0	0	0	0	0	0	0	0	2	2	2	4	4	4	4	4	4	4	4	3	3	4	4	2	2	2
2021-06-17	26	1	2	6	5	sagef	6	4	2		2	2	2	2	2	2	1	1	1	1	2	1	0	0	0	0	1	0	0	0	0	2	2	2	4	4	4	4	4	3	4	2	2	2	4	4	4	2	2
2021-06-16	23	2	1	6	3	para	7	2	2	2	2	2	2	2	2	2	2	2	2	2	2	1	0	0	0	0	0	0	0	1	0	4	4	4	4	4	4	4	4	2	4	2	2	2	4	3	4	3	3
2021-06-16	20	2	1	6	5	stagiaire	3	2	2	2	2	2	2	2	2	2	1	1	1	1	1	1	0	0	1	0	1	0	0	1	0	2	2	2	4	4	4	5	4	3	2	4	2	3	4	4	2	3	2
2021-07-08	30	2	1	6	5	biologiste	5	3	2	2	2	2	2	2	1	2	2	2	2	2	2	1	0	1	0	0	0	1	0	0	1	4	5	3	4	5	4	3	2	2	4	3	2	2	4	5	4	2	2
2021-06-16	23	2	1	6	4	stagiaire	3	2	2	2	2	2	2	2	2	2	2	2	1	1	2	2	0	0	0	0	0	0	0	0	0	2	2	2	4	4	4	4	3	2	2	3	2	2	4	4	2	2	2
2021-06-17	21	2	2	6	5	infirmiere	4	1	2	2	2	2	2	1	1	2	2	1	1	1	1	1	0	0	0	0	1	0	0	0	0	1	1	1	4	4	4	4	4	4	4	4	2	2	4	4	4	2	2
2021-06-22	26	1	2	6	4	para	1	1	2		2	2	2	2	2	2	1	1	1	2	2	2	0	0	0	0	0	0	0	0	0	2	2	2	4	4	4	4	3	2	4	2	2	2	4	4	2	2	2
2021-06-17	24	2	2	6	5	biolog	5	2	2	2	2	2	2	2	1	2	1	2	1	2	2	2	0	0	0	0	0	0	0	0	0	2	2	2	4	4	3	5	4	4	4	4	4	3	4	4	2	2	2
2021-05-28	26	2	1	6	5	sagef	2	2	1	2	2	2	2	2	1	1	1	2	1	1	1	2	0	0	0	0	0	0	0	0	0	4	4	4	3	4	4	3	2	2	2	4	2	2	4	4	2	2	2
2021-06-16	40	1	1	6	5	biolog	4	2	2		2	2	2	2	2	2	1	2	1	2	2	1	1	0	0	0	0	0	0	0	0	2	2	2	4	4	4	2	3	3	3	4	2	3	4	4	4	3	2
2021-06-24	28	1	1	6	4	medecin	6	3	2		2	2	2	2	2	2	1	1	1	1	1	1	0	1	0	0	0	0	0	0	0	2	2	2	4	4	4	4	3	3	4	4	3	3	4	4	2	3	2
2021-06-11	31	2	2	6	4	pharma	2	2	2	2	2	2	2	2	2	2	1	1	1	2	2	1	0	0	1	0	0	0	0	0	0	4	4	4	4	4	4	5	5	4	4	4	4	5	4	4	3	3	3
2021-03-30	68	1	1	6	4	medecin	6	2	2		2	2	2	2	1	2	2	2	1	2	2	1	1	0	1	0	0	0	0	0	0	4	2	2	4	4	4	5	3	2	4	2	2	2	4	4	2	3	4
2021-06-23	28	1	2	6	4	ats	7	5	2		2	2	1	2	1	2	1	1	1	1	1	1	1	0	1	0	0	0	0	0	0	4	4	4	4	4	4	4	2	2	2	2	2	2	4	4	2	2	2
2021-06-16	38	1	2	6	4	biologiste	2	2	2		2	2	2	2	2	2	2	2	2	1	2	1	0	0	0	0	1	0	0	0	0	3	2	2	4	4	2	4	4	2	4	4	2	2	4	4	2	2	2
2021-06-12	25	1	2	6	4	medecin	6	3	2		2	2	2	2	2	2	1	2	1	1	1	1	0	0	0	0	1	0	0	0	0	4	4	4	4	4	4	4	4	3	4	4	3	3	4	4	2	3	3
2021-06-16	20	1	2	6	5	infirmiere	10	5	1		2	2	2	2	2	2	1	1	1	1	2	1	0	0	0	0	1	0	0	0	0	2	2	2	4	4	4	2	3	3	2	4	2	3	4	4	2	3	2
2021-05-24	50	2	1	6	4	medecin	3	3	2	2	2	1	2	2	2	2	2	2	2	2	2	1	0	0	1	0	1	0	0	0	0	2	4	4	4	4	4	4	4	4	5	4	4	4	4	2	2	2	2
2021-06-12	30	1	1	6	4	medecin	6	4	2		2	2	2	2	2	2	1	1	1	1	1	1	0	0	1	0	1	0	0	0	0	2	2	2	5	4	3	4	3	3	3	4	3	3	4	4	4	3	4
2021-06-12	35	1	2	6	3	infirmiere	2	1	2		2	2	2	2	2	2	1	1	1	1	1	1	1	0	0	1	1	0	0	0	0	2	2	2	4	4	4	4	4	4	4	3	2	4	4	4	4	2	2
2021-04-19	38	2	1	6	4	infirmiere	11	5	2	2	2	2	1	2	2	2	2	2	2	2	2	1	0	0	1	1	1	0	0	0	0	2	4	2	4	4	4	4	4	2	4	2	2	2	4	3	2	2	4
2021-07-01	30	1	1	6	4	para	2	2	1		2	2	2	2	2	2	1	1	1	1	1	1	1	1	0	0	0	1	0	0	0	1	1	2	2	2	2	1	2	1	1	1	1	1	1	1	1	1	1
2021-06-16	21	1	2	6	5	pharma	7	3	2		2	2	2	2	2	2	1	1	1	1	1	1	0	0	1	0	1	1	0	0	0	2	2	2	4	4	4	4	4	3	4	4	3	3	4	4	4	3	4
2021-06-10	22	1	2	6	3	labotech	7	3	2		2	2	2	2	2	2	1	1	1	1	2	1	1	0	1	0	0	0	1	0	0	4	4	4	4	4	4	4	4	2	4	4	4	2	4	4	2	1	2
2021-06-11	23	2	1	6	4	biologiste	8	3	2	2	2	2	1	2	1	2	1	1	2	1	1	1	0	0	1	0	1	0	1	0	0	2	2	2	4	4	4	4	4	4	4	3	4	4	4	4	4	3	2
2021-06-12	30	2	1	6	5	labotech	5	2	2	2	2	2	1	2	1	2	1	2	1	2	2	1	0	0	0	0	0	0	0	1	0	4	4	4	4	4	4	4	4	3	3	4	3	3	4	4	2	3	2
2021-06-16	33	1	1	6	5	medecin	8	4	2		2	2	2	2	2	2	1	1	1	1	2	1	0	0	0	0	0	0	0	1	0	2	2	2	4	4	4	2	3	3	3	4	3	3	4	4	4	3	2
2021-06-07	43	1	1	6	4	pharma	7	2	2		2	2	2	2	2	2	1	1	1	1	1	1	0	0	1	1	0	0	0	1	0	2	2	2	4	5	5	4	4	2	2	4	4	3	4	4	5	2	2
2021-06-07	28	1	2	6	4	infirmiere	5	2	2		2	2	2	2	2	2	1	1	1	1	1	1	1	1	1	1	1	0	0	1	0	4	4	4	4	4	4	2	2	2	2	2	2	2	4	4	2	2	2
2021-06-11	42	1	1	6	5	para	7	3	2		2	2	2	2	1	2	1	1	1	1	1	1	0	0	1	0	0	0	0	0	1	2	2	2	4	4	4	2	2	2	2	3	3	2	3	4	2	2	2
2021-06-11	31	2	3	6	4	sagef	5	4	2	2	2	2	2	2	2	2	1	1	1	1	1	1	1	1	1	1	1	0	0	0	1	3	2	3	2	2	2	4	2	2	2	4	2	2	4	4	2	2	2
2021-06-11	23	1	2	6	5	infirmiere	1	1	2		2	2	2	2	1	1	1	1	1	1	1	2	0	0	0	0	0	0	0	0	0	4	4	4	4	4	4	4	4	3	4	2	2	2	4	4	2	2	2
2021-06-11	30	1	2	6	4	infirmiere	1	1	2		2	2	2	2	1	1	2	2	2	2	2	2	0	0	0	0	0	0	0	0	0	2	2	2	2	4	4	2	2	2	2	2	2	2	2	2	3	4	2
2021-06-24	25	2	3	6	5	medecin	3	1	2	2	2	2	1	2	2	1	1	2	1	2	2	2	0	0	0	0	0	0	0	0	0	2	2	2	4	4	4	4	4	3	4	4	2	3	4	4	4	3	2
2021-06-16	22	2	1	6	5	biolog	5	2	2	2	2	2	2	2	2	2	1	1	1	2	2	2	0	0	0	0	0	0	0	0	0	2	2	2	4	4	4	5	4	3	5	4	2	3	4	4	2	3	2
2021-06-10	27	2	1	6	4	infirmiere	3	2	2	2	2	2	2	2	1	1	2	1	1	2	2	2	0	0	0	0	0	0	0	0	0	4	4	4	5	4	4	4	4	2	4	4	4	2	4	4	4	2	2
2021-06-12	37	1	1	6	4	infirmiere	5	2	2		2	2	2	2	1	2	1	1	1	1	1	2	0	0	0	0	0	0	0	0	0	4	4	4	4	4	4	5	3	3	4	3	2	2	4	4	2	2	2
2021-06-16	36	1	1	6	4	pharma	2	2	2		2	1	2	2	2	1	1	1	1	1	2	2	0	0	0	0	0	0	0	0	0	2	2	2	4	4	4	2	2	2	2	4	2	2	4	4	4	3	2
2021-06-24	25	2	1	6	5	para	5	2	2	2	2	2	2	2	2	2	2	2	2	2	2	2	0	0	0	0	0	0	0	0	0	2	2	2	4	4	4	4	4	3	4	4	4	3	4	4	2	2	2
2021-06-24	23	2	1	6	5	stagiaire	2	2	1	1	2	2	1	2	1	2	1	2	1	2	2	2	0	0	0	0	0	0	0	0	0	4	4	4	4	4	4	4	4	3	4	4	2	3	4	4	2	3	2
2021-06-12	25	2	1	6	4	infirmiere	5	2	2	2	2	2	2	2	2	2	2	2	2	2	2	2	0	0	0	0	0	0	0	0	0	4	4	4	4	4	4	4	2	2	4	4	2	2	4	4	2	2	2
2021-06-11	35	1	1	6	4	pharma	4	3	2		2	2	2	2	2	2	2	2	1	1	2	2	0	0	0	0	0	0	0	0	0	2	2	2	4	4	4	4	2	2	4	4	2	2	4	4	2	2	2
2021-06-17	22	2	2	6	5	sagef	5	3	1	2	2	2	1	2	1	2	1	1	1	2	2	2	0	0	0	0	0	0	0	0	0	2	2	2	4	4	4	4	4	4	4	4	3	2	4	4	4	2	2
2021-07-06	39	2	1	6	5	infirmiere	5	3	2	2	2	2	2	1	2	2	2	2	2	2	2	2	0	0	0	0	0	0	0	0	0	5	4	2	2	2	3	3	2	2	2	2	2	3	2	2	2	2	2
2021-06-12	25	1	2	6	5	stagiaire	5	3	1		2	2	2	2	1	2	2	1	1	2	2	2	0	0	0	0	0	0	0	0	0	4	4	4	4	4	4	4	4	3	3	4	3	2	4	4	4	3	4
2021-06-22	35	2	2	6	5	infirmiere	4	3	2	2	2	2	2	2	2	2	1	1	1	2	2	2	0	0	0	0	0	0	0	0	0	2	2	2	4	4	3	3	3	2	4	2	2	2	5	4	4	2	2
2021-06-16	24	2	2	6	5	medecin	13	4	2	2	2	2	2	2	1	2	2	1	1	2	2	2	0	0	0	0	0	0	0	0	0	2	2	2	4	4	4	2	3	3	3	5	3	3	4	4	2	3	2
2021-06-17	26	2	2	6	5	pharma	14	4	2	2	2	2	2	2	1	2	2	1	1	2	2	2	0	0	0	0	0	0	0	0	0	4	2	4	4	4	4	2	2	4	2	4	2	2	4	4	2	2	2
2021-05-24	41	1	1	6	5	infirmiere	8	4	1		2	2	1	2	2	2	2	2	1	2	2	2	0	0	0	0	0	0	0	0	0	3	2	4	4	2	4	4	4	2	2	4	2	4	4	4	2	2	2
2021-06-24	35	1	1	6	4	infirmiere	7	4	2		2	2	2	2	2	2	1	1	1	1	1	2	0	0	0	0	0	0	0	0	0	4	4	4	4	4	3	4	3	2	2	2	2	2	4	4	4	2	2
2021-06-16	27	2	2	6	4	infirmiere	10	4	2	2	2	2	2	2	2	2	1	1	1	2	2	2	0	0	0	0	0	0	0	0	0	4	4	4	4	4	4	3	3	3	3	4	3	3	4	4	4	3	4
2021-06-16	20	2	2	6	5	infirmiere	15	5	2	2	2	2	2	2	1	2	1	2	1	1	1	2	0	0	0	0	0	0	0	0	0	2	2	2	2	4	4	4	3	3	3	4	2	3	4	4	4	3	2
2021-06-16	19	2	2	6	5	medecin	30	5	2	2	2	2	2	2	2	2	2	2	2	2	2	2	0	0	0	0	0	0	0	0	0	2	2	2	4	4	4	3	3	3	3	3	3	3	4	4	4	3	4
2021-06-23	27	1	2	6	5	medecin	10	5	2		2	2	2	2	2	1	2	2	1	2	2	2	0	0	0	0	0	0	0	0	0	2	4	4	4	5	5	2	4	2	4	4	4	4	4	2	4	2	2
2021-05-24	37	2	3	6	5	stagiaire	7	5	2	2	2	2	1	1	1	1	1	1	2	2	2	2	0	0	0	0	0	0	0	0	0	4	2	4	4	5	5	5	5	4	5	5	5	2	4	4	2	2	2
2021-06-11	28	1	2	6	4	biolog	17	7	2		2	2	2	2	2	2	2	1	1	1	2	2	0	0	0	0	0	0	0	0	0	4	4	4	4	4	4	4	2	2	4	4	2	2	4	4	2	2	2
2021-06-10	70	1	1	6	4	medecin	30	22	2		2	1	1	2	2	1	1	1	1	1	1	2	0	0	0	0	0	0	0	0	0	2	4	4	5	4	5	4	5	2	2	2	2	2	4	4	2	1	2
2021-06-17	24	2	1	6	5	stagiaire	4	2	2	2	2	2	1	2	2	2	2	2	1	2	2	1	0	0	1	0	0	0	0	0	0	4	2	4	4	4	4	4	4	4	4	4	4	2	4	4	2	2	2
2021-06-07	30	1	1	6	4	labotech	4	3	2		2	2	2	2	1	2	1	1	1	1	1	1	0	1	0	0	1	0	0	0	0	4	4	4	5	5	5	2	2	2	4	2	2	2	4	2	4	4	2
2021-04-26	38	2	1	6	4	pharma	7	3	2	2	2	2	2	2	1	2	2	1	1	2	2	1	0	0	1	1	1	0	0	0	0	4	4	4	4	2	4	4	4	4	4	4	2	2	4	4	4	2	2
2021-06-07	25	1	2	6	4	pharma	3	3	2		2	2	2	2	2	2	2	2	2	2	2	1	1	1	0	0	1	1	0	0	0	4	4	4	5	5	5	4	4	4	4	4	4	4	4	4	2	1	5
2021-06-24	23	1	2	6	4	labotech	1	1	1		2	2	2	2	2	2	1	1	1	2	2	1	0	0	0	1	0	0	0	1	0	3	3	3	4	2	4	5	4	2	5	3	2	2	4	4	2	2	4
2021-06-16	28	1	2	6	4	infirmiere	11	4	2		2	2	2	2	2	2	1	1	1	1	2	2	0	0	0	0	0	0	0	0	0	4	4	4	4	4	4	5	4	2	5	4	2	3	4	4	2	2	2
2021-06-12	29	2	2	6	4	sagef	20	10	2	2	2	2	1	2	2	1	2	2	1	1	2	2	0	0	0	0	0	0	0	0	0	2	2	2	5	5	5	5	4	4	4	4	2	4	4	4	4	2	2
2021-06-24	35	2	1	6	4	biologiste	6	1	2	2	2	2	1	2	2	2	2	2	2	2	2	2	0	0	0	0	0	0	0	0	0	4	5	4	4	3	5	4	4	2	4	4	2	4	4	4	2	2	2
2021-06-16	32	2	2	6	5	infirmiere	13	4	2	2	2	2	2	2	2	2	1	1	1	1	1	2	0	0	0	0	0	0	0	0	0	2	4	2	4	4	4	4	2	2	2	4	2	4	4	4	4	2	2
2021-05-29	29	2	2	6	5	infirmiere	12	8	2	2	2	2	2	2	2	2	2	2	2	2	2	2	0	0	0	0	0	0	0	0	0	4	2	4	4	4	4	4	4	4	4	4	2	2	4	4	4	2	2
2021-06-16	31	1	1	6	4	infirmiere	3	2	2		2	2	2	2	2	2	1	1	1	1	2	1	0	0	0	0	1	0	0	0	0	4	4	4	4	4	4	4	4	2	4	2	3	4	4	4	2	2	2
2021-06-10	42	1	1	6	3	biolog	10	4	2		2	2	2	2	2	1	2	1	2	2	2	1	1	0	1	0	1	0	0	0	0	4	4	4	4	4	4	4	2	2	4	3	2	2	4	4	4	2	2
2021-07-07	28	1	2	6	3	infirmiere	20	7	2		2	2	2	2	2	1	1	1	2	1	2	1	0	0	1	1	1	0	0	0	0	4	2	4	5	4	4	4	4	2	4	2	2	2	3	3	2	2	2
2021-05-18	29	1	1	6	5	biologiste	4	2	1		2	2	2	2	2	2	1	1	1	1	1	1	0	0	0	0	1	1	1	0	0	2	2	2	4	4	4	4	4	4	4	4	2	2	4	4	2	2	4
2021-06-11	28	1	2	6	4	medecin	6	2	2		2	2	2	2	2	2	1	1	1	1	2	1	0	0	0	0	0	0	0	1	0	4	4	4	4	4	4	4	2	3	4	2	3	2	4	4	2	2	4
2021-06-22	26	2	1	6	5	medecin	5	1	2	2	2	2	2	2	2	2	1	1	1	2	2	2	0	0	0	0	0	0	0	0	0	2	2	2	4	4	3	4	3	2	4	2	2	2	4	4	4	2	2
2021-06-23	35	1	1	6	5	biolog	5	2	1		2	2	2	2	2	2	2	1	2	2	2	2	0	0	0	0	0	0	0	0	0	2	4	2	4	4	4	4	4	4	4	2	4	2	4	4	2	2	2
2021-06-10	32	1	2	6	4	infirmiere	2	2	2		2	2	2	2	2	2	1	1	1	1	1	2	0	0	0	0	0	0	0	0	0	2	2	2	5	4	4	2	2	2	2	3	2	1	3	3	2	1	2
2021-06-23	35	1	1	6	5	infirmiere	4	2	1		2	2	2	2	2	2	2	1	1	2	2	2	0	0	0	0	0	0	0	0	0	2	2	3	4	4	4	5	4	4	4	4	4	4	2	2	2	2	3
2021-06-17	32	1	2	6	4	ats	5	2	2		2	2	2	2	2	2	1	1	1	1	2	1	1	0	1	0	1	0	0	0	0	4	4	4	4	4	4	4	4	2	4	3	2	3	4	4	4	2	2
2021-06-29	30	1	2	6	5	infirmiere	5	3	2		2	2	2	2	2	2	1	2	1	2	2	1	0	0	0	0	1	1	1	0	0	1	4	2	4	4	4	3	4	2	4	2	2	2	4	4	4	2	4
2021-06-17	52	1	1	6	5	infirmiere	5	4	2		2	2	2	2	2	2	1	1	1	1	2	1	0	1	1	0	0	0	0	0	0	2	2	2	4	4	4	4	4	2	4	4	2	2	4	4	4	2	2
2021-06-24	18	2	1	6	5	infirmiere	4	3	2	1	2	2	2	2	2	2	1	1	1	2	2	1	0	1	1	0	1	0	0	0	0	4	4	4	4	4	4	2	2	2	5	2	2	2	4	4	2	2	2
2021-06-24	30	1	1	6	5	pharma	4	2	2		2	2	2	2	1	2	1	1	1	1	1	1	0	0	0	0	1	0	0	0	1	2	2	2	4	4	4	4	3	3	3	4	4	3	4	4	2	3	2
2021-06-12	23	2	1	6	3	stagiaire	4	2	2	2	2	2	2	2	2	2	1	1	1	1	1	2	0	0	0	0	0	0	0	0	0	4	4	4	4	4	4	5	5	5	5	4	5	5	4	4	4	2	2
2021-06-24	40	1	1	6	5	infirmiere	4	3	2		2	2	2	2	2	2	1	1	1	2	2	2	0	0	0	0	0	0	0	0	0	2	2	2	4	4	3	2	2	2	2	2	2	2	4	4	2	2	2
2021-06-23	28	1	2	6	4	sagef	6	3	2		2	2	1	2	2	2	2	2	2	2	2	2	0	0	0	0	0	0	0	0	0	2	2	2	4	4	4	3	4	4	2	3	2	3	4	4	2	2	3
2021-06-10	19	2	2	6	4	infirmiere	4	3	2	2	2	2	2	2	1	2	1	2	1	2	2	2	0	0	0	0	0	0	0	0	0	2	2	2	4	4	4	4	4	4	4	4	3	4	4	4	4	3	2
2021-06-12	25	1	2	6	4	para	4	4	1		2	2	1	2	1	2	1	1	1	2	2	2	0	0	0	0	0	0	0	0	0	3	4	3	4	4	4	4	2	2	4	2	2	2	4	5	4	2	2
2021-06-22	45	2	1	6	5	infirmiere	6	4	2	2	2	2	2	2	2	2	1	1	1	2	2	2	0	0	0	0	0	0	0	0	0	2	2	2	4	4	2	4	2	2	4	2	2	2	4	4	4	2	2
2021-06-16	30	1	1	6	5	pharma	10	5	1		2	2	2	2	2	2	1	1	1	2	2	2	0	0	0	0	0	0	0	0	0	4	4	4	4	4	4	5	4	3	4	2	1	3	4	4	4	3	4
2021-06-11	26	1	2	6	3	medecin	10	6	2		2	1	2	2	2	2	1	2	2	2	2	2	0	0	0	0	0	0	0	0	0	4	4	4	4	4	4	4	4	3	4	4	3	2	4	4	2	2	4
2021-06-24	24	2	1	6	5	labotech	10	5	2	2	2	2	2	2	1	2	1	1	1	2	2	2	0	0	0	0	0	0	0	0	0	4	4	4	4	4	3	4	3	2	4	2	2	2	4	3	4	2	2
2021-06-11	22	1	2	6	3	biolog	5	5	2		2	2	2	2	2	2	2	2	2	2	2	2	0	0	0	0	0	0	0	0	0	4	4	4	4	4	4	4	4	4	2	4	3	3	4	4	4	3	4
2021-05-18	32	1	4	6	4	pharma	3	3	1		2	2	1	1	1	2	1	1	1	2	2	1	1	1	1	0	0	0	0	0	0	2	2	2	4	4	4	4	2	2	2	3	2	2	4	4	2	2	2
2021-06-24	25	1	1	6	4	infirmiere	2	2	2		2	2	2	2	2	2	1	1	1	1	1	1	0	0	0	0	1	0	0	0	0	2	2	2	4	4	4	2	2	2	2	2	2	2	4	4	4	2	3
2021-06-07	29	1	2	6	4	medecin	11	4	2		2	2	1	2	1	1	1	1	1	2	2	1	0	0	0	0	1	0	0	0	0	2	2	2	4	4	4	4	5	4	4	4	4	2	5	4	4	2	2
2021-06-11	35	1	2	6	4	infirmiere	4	3	2		2	2	1	2	2	1	1	1	1	1	1	1	1	0	1	0	1	0	0	0	0	4	4	4	4	4	4	4	4	2	4	2	2	2	4	4	2	2	2
2021-06-22	71	1	1	6	5	medecin	8	3	2		2	2	2	2	2	2	1	1	1	1	1	1	0	0	0	0	0	1	0	0	0	2	2	2	4	4	4	4	4	3	4	4	3	3	4	4	2	3	2
2021-04-20	45	1	1	6	4	medecin	6	2	2		2	2	2	2	2	2	1	1	1	1	1	1	0	0	1	1	0	1	0	0	0	4	4	4	4	4	4	2	2	2	2	3	2	2	4	4	4	4	2
2021-03-26	44	1	1	6	4	medecin	7	3	2		2	2	2	2	1	2	2	2	2	2	2	1	0	1	0	1	0	0	0	1	0	4	4	4	4	4	4	4	4	4	4	4	3	2	4	4	1	4	4
2021-05-05	39	1	3	6	4	infirmiere	5	2	2		2	2	2	2	2	2	1	1	1	1	1	1	0	0	0	1	0	1	0	1	0	2	2	2	4	4	4	3	3	3	3	4	4	3	4	4	2	2	2
2021-06-11	32	1	2	6	4	stagiaire	2	2	1		2	2	2	2	2	2	1	1	1	1	1	2	0	0	0	0	0	0	0	0	0	2	2	2	4	4	4	3	3	2	2	4	2	2	4	4	2	2	2
2021-05-20	53	1	1	6	4	infirmiere	8	4	2		2	2	1	2	2	2	1	1	1	2	2	2	0	0	0	0	0	0	0	0	0	4	4	4	4	4	3	4	4	4	4	2	2	2	4	4	4	2	2
2021-06-23	39	1	1	6	4	infirmiere	7	5	2		2	2	2	2	2	2	1	2	2	1	1	2	0	0	0	0	0	0	0	0	0	4	4	4	4	4	5	4	4	2	4	4	2	2	4	4	2	3	3
2021-06-17	19	2	1	6	5	biologiste	15	8	2	2	2	2	1	2	2	2	1	1	1	2	2	2	0	0	0	0	0	0	0	0	0	2	2	2	4	4	4	4	2	2	4	4	2	2	4	4	4	2	2
2021-04-07	48	2	1	6	5	infirmiere	7	3	2	2	2	2	2	2	2	1	2	1	1	1	1	2	0	0	0	0	0	0	0	0	0	4	4	4	4	4	4	5	4	4	4	4	3	2	4	4	4	4	2
2021-06-07	28	1	1	6	4	pharma	4	4	1		2	2	2	2	1	2	1	1	1	1	1	1	0	0	0	0	1	1	0	0	0	4	4	4	5	5	5	4	4	2	4	2	2	2	4	5	2	2	2
2021-06-16	38	2	1	6	5	infirmiere	8	4	2	2	2	2	2	2	2	2	1	1	1	2	2	2	0	0	0	0	0	0	0	0	0	2	2	2	4	4	4	4	5	3	4	4	2	3	4	4	4	3	2
2021-06-22	36	2	1	6	4	infirmiere	14	11	2	2	2	1	2	2	1	2	1	1	1	1	1	1	1	0	1	0	0	0	0	0	0	4	4	4	4	4	4	4	4	2	5	4	4	4	4	4	4	2	2
2021-06-23	42	1	1	6	4	sagef	7	5	2		2	2	2	2	2	2	1	1	1	1	1	1	1	0	1	0	0	0	0	0	0	2	2	2	4	4	5	5	4	2	4	2	2	2	4	4	2	2	2
2021-06-10	38	2	1	6	4	biologiste	3	2	1	2	2	2	2	2	2	2	2	2	2	2	2	1	0	1	0	0	1	0	0	0	0	2	2	2	4	4	4	4	4	4	4	2	2	3	4	4	2	2	2
2021-06-10	21	1	2	6	3	medecin	5	3	2		2	2	2	2	1	1	2	1	2	2	2	1	1	0	1	0	1	0	0	0	0	4	2	4	4	4	2	5	4	2	4	4	4	2	4	4	1	2	2
2021-06-11	45	1	1	6	4	pharma	10	3	2		2	2	1	1	1	1	1	2	1	2	2	1	1	0	1	0	1	0	0	0	0	4	4	4	5	5	5	5	4	4	4	5	2	4	3	3	3	2	2
2021-06-22	48	1	1	6	4	infirmiere	18	6	2		2	1	2	2	2	2	1	1	1	1	1	1	0	1	1	1	1	0	0	0	0	2	2	2	4	4	3	2	2	2	4	2	2	2	4	4	4	2	2
2021-06-10	30	1	1	6	5	medecin	3	2	2		2	2	2	2	1	2	1	1	1	1	1	1	0	0	0	0	0	1	0	0	0	4	3	3	4	4	4	4	4	4	4	4	2	2	4	4	2	3	2
2021-06-11	38	1	1	6	4	infirmiere	14	7	2		2	2	1	2	2	1	1	1	1	1	1	1	0	1	1	0	0	1	0	0	0	4	4	4	4	4	4	4	4	4	4	4	3	4	4	4	2	2	2
2021-03-24	50	2	1	6	5	infirmiere	7	3	2	2	1	1	1	1	2	2	1	1	1	1	2	1	0	0	0	0	0	0	0	1	0	1	1	1	4	4	5	4	3	2	5	3	3	4	5	4	4	4	1
2021-06-10	34	1	2	6	4	infirmiere	1	1	1		2	2	1	2	2	2	1	1	1	1	1	2	0	0	0	0	0	0	0	0	0	2	2	2	4	4	4	2	3	2	2	4	2	2	4	4	2	2	2
2021-06-10	20	1	2	6	5	pharma	6	2	2		2	2	2	2	2	2	2	2	2	1	1	2	0	0	0	0	0	0	0	0	0	2	3	3	3	4	4	4	4	3	4	2	4	2	4	4	2	2	2
2021-06-10	30	2	1	6	4	pharma	6	2	2	2	2	2	1	2	1	2	1	1	1	1	2	2	0	0	0	0	0	0	0	0	0	4	4	2	4	4	4	2	4	3	4	4	4	4	4	4	2	4	4
2021-06-22	37	1	1	6	5	para	7	3	2		2	2	2	2	2	2	1	1	1	2	2	2	0	0	0	0	0	0	0	0	0	2	2	2	4	4	4	2	2	2	4	2	2	2	4	4	2	2	2
2021-06-23	30	1	2	6	4	medecin	5	3	2		2	2	1	2	1	2	2	2	2	2	2	2	0	0	0	0	0	0	0	0	0	4	2	4	4	4	4	4	2	2	4	2	2	2	4	4	4	2	2
2021-06-12	25	2	2	6	4	infirmiere	6	6	2	2	2	2	2	2	2	2	2	2	2	2	2	2	0	0	0	0	0	0	0	0	0	2	2	2	4	4	4	4	4	4	4	4	2	4	4	4	2	2	2
2021-06-12	30	1	1	6	4	ats	1	1	2		2	2	2	2	2	2	1	1	1	1	2	2	0	0	0	0	0	0	0	0	0	4	4	4	4	4	4	2	2	2	2	4	3	2	4	4	4	3	4
2021-06-10	49	1	1	6	4	ats	5	2	1		2	2	2	2	2	2	1	1	1	1	1	1	1	0	1	0	0	0	0	0	0	4	2	4	4	4	4	4	4	2	2	2	2	2	4	4	2	2	2
2021-06-01	60	2	4	6	5	infirmiere	5	5	1	2	1	2	2	2	2	2	1	1	1	1	1	1	0	0	0	1	0	0	1	1	0	4	5	4	5	4	3	2	1	1	2	1	2	1	4	4	2	2	2
2021-06-24	61	1	1	6	5	biologiste	4	3	2		2	2	2	2	2	2	1	1	1	2	2	2	0	0	0	0	0	0	0	0	0	2	2	2	4	4	3	3	3	2	1	2	2	2	4	4	4	2	2
2021-06-22	56	2	1	6	5	medecin	4	2	2	2	2	2	2	2	2	2	1	1	1	2	2	1	0	0	1	0	0	0	0	0	0	2	2	2	4	4	4	3	2	2	4	2	2	2	4	4	4	2	2
2021-06-11	57	2	1	6	4	medecin	4	4	2	2	2	2	2	2	2	2	1	1	1	2	2	1	0	1	1	0	0	0	0	0	0	4	4	4	4	4	4	4	4	2	4	2	2	2	4	4	2	2	2
2021-06-07	37	2	1	6	4	pharma	5	3	2	2	2	2	2	2	1	2	1	1	1	2	2	2	0	0	0	0	0	0	0	0	0	4	4	4	4	4	4	4	4	2	4	4	4	4	4	4	2	1	1
2021-06-01	36	2	1	6	4	biolog	10	7	2	2	2	2	1	2	1	2	2	2	2	1	2	1	0	0	1	1	1	0	0	0	0	4	4	4	4	4	4	4	4	4	2	4	2	2	4	4	4	2	2
2021-06-10	29	1	2	6	4	medecin	5	5	2		2	2	1	2	2	2	1	1	1	1	1	1	1	0	0	0	1	0	0	1	0	1	4	2	5	5	5	1	2	1	1	2	1	1	4	4	1	1	2
2021-06-23	53	1	1	6	4	infirmiere	12	2	1		2	2	1	2	2	2	1	1	1	2	2	2	0	0	0	0	0	0	0	0	0	2	2	2	4	4	4	2	4	2	2	4	2	2	4	4	2	2	2
2021-06-10	35	2	1	6	4	sagef	15	5	2	2	2	2	2	2	2	2	1	2	2	1	2	2	0	0	0	0	0	0	0	0	0	2	2	2	4	2	4	4	4	2	2	4	2	2	4	4	2	2	2
2021-06-11	30	1	1	6	4	biologiste	10	5	2		1	2	2	1	2	2	1	1	1	2	2	1	0	0	0	0	0	1	0	0	0	2	2	2	4	4	4	4	4	3	4	5	3	3	4	4	2	2	4
2021-06-25	38	2	1	6	5	medecin	6	3	2	2	2	2	2	2	1	2	1	2	1	2	2	2	0	0	0	0	0	0	0	0	0	4	2	4	4	4	4	4	4	2	4	2	2	4	4	4	2	2	2
2021-06-11	62	1	1	6	4	medecin	6	2	2		2	2	2	1	1	2	1	1	1	1	1	1	1	0	0	0	1	0	1	0	0	2	2	2	5	5	5	2	2	2	2	2	2	4	4	4	2	1	1
2021-06-16	58	2	1	6	4	pharma	5	3	2	2	1	2	2	2	2	2	1	1	1	1	1	1	0	1	1	0	0	0	0	1	0	2	2	2	4	4	4	4	4	3	5	4	3	3	4	4	4	3	2
2021-06-22	62	2	1	6	4	biolog	4	3	2	2	2	2	2	2	1	2	1	1	1	2	2	1	0	0	0	0	1	0	0	0	0	2	2	2	4	4	4	2	2	2	2	4	2	2	4	4	2	3	2
2021-06-11	29	2	2	6	4	medecin	6	4	2	2	2	2	2	2	2	1	2	1	1	1	1	2	0	0	0	0	0	0	0	0	0	4	2	4	4	4	4	2	2	2	2	2	2	2	4	2	2	2	2
2021-06-11	43	1	1	6	4	infirmiere	9	5	2		2	2	2	2	1	2	1	1	1	2	2	2	0	0	0	0	0	0	0	0	0	2	2	2	4	4	4	4	4	2	4	2	2	2	4	4	2	2	2
2021-06-07	60	2	1	6	4	pharma	4	3	2	2	2	2	2	2	1	2	1	1	1	2	2	1	0	1	1	1	0	0	0	0	0	2	4	2	5	5	5	4	4	2	2	4	2	4	4	4	2	1	1
2021-06-03	59	1	1	6	4	medecin	19	13	2		2	2	1	2	1	2	1	1	1	1	1	1	0	1	1	1	0	0	0	0	0	4	4	2	4	4	4	4	4	2	4	2	2	2	4	4	4	2	2
2021-06-10	38	1	1	6	4	sagef	10	5	1		2	1	2	2	2	2	1	1	1	1	1	2	0	0	0	0	0	0	0	0	0	2	2	2	4	4	4	4	3	3	4	4	3	3	4	4	2	2	2
2021-06-11	25	1	2	6	4	infirmiere	8	5	2		2	2	1	2	1	2	2	1	1	2	2	2	0	0	0	0	0	0	0	0	0	2	2	2	4	4	4	5	5	2	2	4	2	4	4	4	2	2	2
2021-06-23	73	1	1	6	4	infirmiere	6	2	2		1	1	2	2	2	2	1	1	1	2	2	1	0	0	0	0	1	0	1	0	0	2	4	2	4	4	5	4	2	2	2	2	2	2	4	4	2	2	2
2021-06-17	75		1	6	4	infirmiere	9	2	2		2	2	2	2	2	2	1	1	1	1	2	2	0	0	0	0	0	0	0	0	0	2	2	2	4	4	4	2	2	2	2	2	2	2	4	4	2	2	2
2021-06-24	25	2	1	6	3	sagef	6	2	2	2	2	2	1	2	2	2	1	1	1	1	1	1	1	0	0	0	0	0	0	0	0	2	2	2	2	4	4	2	2	2	2	2	2	2	4	4	2	2	2
2021-06-22	30	1	1	6	5	infirmiere	3	2	2		2	2	2	2	2	2	1	1	1	2	2	1	0	1	0	0	0	0	0	0	0	2	2	2	4	3	3	2	3	2	4	2	2	2	4	4	2	2	2
2021-06-22	22	2	2	6	5	infirmiere	10	2	2	2	2	1	2	2	2	2	1	1	1	2	2	1	0	1	0	0	0	0	0	0	0	2	2	2	3	3	3	2	2	2	2	2	2	2	4	3	2	2	2
2021-06-24	32	2	1	6	5	infirmiere	3	2	2	2	2	2	2	2	2	2	1	1	1	2	2	1	0	1	0	0	0	0	0	0	0	2	2	2	4	3	3	2	3	2	2	2	2	2	4	4	4	2	2
2021-06-11	21	1	2	6	5	sagef	8	3	2		2	2	2	2	2	2	1	1	1	2	2	1	0	1	0	0	0	0	0	0	0	2	2	2	4	4	4	2	4	2	4	2	2	2	4	4	2	2	2
2021-06-16	18	2	1	6	5	infirmiere	5	3	2	2	2	2	2	2	2	2	2	2	1	2	2	1	0	1	0	0	0	0	0	0	0	2	2	2	4	4	4	4	4	2	3	2	2	2	4	4	3	4	4
2021-06-11	29	2	1	6	5	medecin	10	6	2	2	2	2	2	2	1	2	2	2	1	1	1	1	0	1	0	0	0	0	0	0	0	2	2	2	4	4	4	4	4	2	4	2	2	2	4	4	2	2	2
2021-06-11	22	2	2	6	5	stagiaire	9	4	2	2	2	2	2	2	2	2	2	2	1	1	1	1	0	0	1	0	0	0	0	0	0	4	4	4	4	4	4	4	4	4	4	4	3	3	4	4	3	3	2
2021-06-11	25	1	2	6	5	infirmiere	12	5	2		2	2	2	2	2	2	1	1	1	2	2	1	0	0	1	0	0	0	0	0	0	4	4	4	4	4	4	4	4	2	4	2	2	2	4	4	2	3	3
2021-06-10	28	1	2	6	4	ats	10	5	2		2	2	2	2	2	2	2	1	1	1	1	1	0	0	1	0	0	0	0	0	0	4	5	4	4	4	4	5	4	4	4	4	4	2	4	4	4	3	4
2021-06-17	25	2	1	6	5	infirmiere	3	2	1	2	2	2	1	2	1	1	1	1	2	2	2	1	0	0	1	0	0	0	0	0	0	2	2	2	4	4	4	4	4	4	4	4	4	4	4	4	2	2	2
2021-06-12	19	2	2	6	5	infirmiere	8	3	2	2	2	2	2	2	2	2	1	1	1	1	1	1	1	0	1	0	0	0	0	0	0	2	2	2	4	4	4	4	2	2	4	4	2	2	4	4	4	2	2
2021-06-24	22	1	2	6	4	sagef	6	4	2		2	2	2	2	2	2	2	2	1	2	2	1	0	1	1	0	0	0	0	0	0	2	2	2	4	4	4	5	3	3	4	4	3	3	4	4	2	3	2
2021-06-23	68	1	1	6	5	sagef	13	7	2		2	1	1	2	2	2	1	2	1	2	1	1	0	1	1	0	0	0	0	0	0	2	2	2	4	4	4	4	4	2	4	4	4	2	4	4	4	2	2
2021-06-22	30	1	2	6	5	stagiaire	30	7	1		2	1	2	2	2	2	2	1	1	2	2	1	1	1	1	0	0	0	0	0	0	2	2	2	4	4	4	4	4	4	4	4	2	4	4	4	4	2	2
2021-06-11	20	2	2	6	3	infirmiere	20	7	2	2	2	2	2	2	1	1	2	2	1	2	2	1	1	1	1	0	0	0	0	0	0	2	2	2	4	4	4	4	4	4	4	4	4	4	4	4	2	2	2
2021-06-22	30	2	1	6	5	medecin	4	2	2	2	2	2	2	2	2	2	1	1	1	2	2	1	0	0	0	1	0	0	0	0	0	4	4	4	4	3	3	4	2	2	4	2	2	2	4	4	4	2	2
2021-06-17	23	2	1	6	5	infirmiere	7	2	2	2	2	2	2	2	2	2	1	1	1	2	2	1	0	0	0	1	0	0	0	0	0	4	4	4	4	4	4	4	2	2	4	2	2	2	4	4	2	2	2
2021-06-22	25	2	2	6	5	sagef	3	3	2	2	2	2	2	2	2	2	1	1	1	1	2	1	0	0	0	1	0	0	0	0	0	2	2	2	4	3	4	2	2	2	4	2	2	2	3	3	2	2	2
2021-04-14	26	1	2	6	4	infirmiere	10	4	2		2	2	1	2	2	2	1	2	1	1	2	1	0	0	0	1	0	0	0	0	0	2	2	4	4	4	5	4	4	2	4	4	2	2	5	4	2	2	3
2021-06-22	32	1	2	6	5	infirmiere	18	8	2		2	2	2	2	2	2	2	2	2	2	2	1	0	0	0	1	0	0	0	0	0	2	2	2	4	4	4	4	4	3	4	4	4	3	4	4	2	3	2
2021-06-24	31	2	1	6	5	sagef	9	3	2	1	2	2	2	2	2	2	1	1	1	2	2	1	0	1	0	1	0	0	0	0	0	4	4	4	4	4	4	2	2	2	4	2	2	2	4	4	2	2	2
2021-04-14	43	2	1	6	5	medecin	16	8	2	2	2	2	1	2	2	2	2	1	1	2	2	1	0	1	0	1	0	0	0	0	0	4	2	2	4	3	4	2	4	2	2	2	2	2	4	4	4	2	3
2021-06-11	25	1	2	6	5	sagef	7	3	2		2	2	2	2	2	2	1	1	1	1	1	1	0	0	1	1	0	0	0	0	0	2	2	2	4	4	4	2	4	2	4	2	2	2	4	4	2	2	2
2021-06-10	21	2	2	6	5	sagef	20	5	2	2	2	2	2	2	2	2	2	2	2	2	2	1	1	1	1	1	0	0	0	0	0	2	2	2	4	4	4	4	4	2	4	2	2	2	4	4	2	2	4
2021-06-23	27	1	2	6	4	stagiaire	1	1	1		2	2	1	2	2	2	1	1	1	1	2	1	0	0	0	0	1	0	0	0	0	4	4	4	4	4	4	4	4	2	3	2	2	4	4	4	2	2	3
2021-06-10	18	2	2	6	5	infirmiere	4	1	2	2	2	2	2	1	1	2	1	1	1	2	2	1	0	0	0	0	1	0	0	0	0	4	4	4	4	4	4	4	4	4	4	4	3	3	4	4	4	2	2
2021-06-11	32	2	1	6	5	infirmiere	1	1	2	2	2	2	2	2	2	2	1	2	2	1	2	1	0	0	0	0	1	0	0	0	0	2	2	2	4	4	4	5	5	2	3	4	4	2	4	4	2	2	2
2021-06-17	24	2	1	6	5	infirmiere	3	1	2	2	2	2	2	2	2	2	1	1	1	2	2	1	0	0	0	0	1	0	0	0	0	2	2	2	4	4	4	3	2	2	4	2	2	2	4	4	4	2	2
2021-06-10	25	1	2	6	5	infirmiere	6	2	2		2	2	2	1	2	2	1	1	1	1	1	1	0	0	0	0	1	0	0	0	0	4	4	4	4	4	4	3	4	2	4	2	2	2	4	4	2	2	2
2021-06-24	25	1	2	6	5	infirmiere	4	2	2		2	2	2	2	2	2	1	1	1	2	2	1	0	0	0	0	1	0	0	0	0	2	2	2	4	3	3	3	3	2	4	2	2	2	4	4	4	2	2
2021-06-24	25	1	2	6	5	pharma	2	2	2		2	2	2	2	2	2	1	1	1	2	2	1	0	0	0	0	1	0	0	0	0	2	2	2	4	4	3	2	2	2	2	2	2	2	4	4	2	2	2
2021-06-22	25	2	1	6	5	stagiaire	3	2	2	2	2	2	2	2	2	2	1	1	1	2	2	1	0	0	0	0	1	0	0	0	0	2	2	2	3	3	3	4	3	2	4	2	2	2	4	4	4	2	2
2021-06-24	27	2	1	6	3	stagiaire	6	2	2	2	2	2	1	2	2	2	1	1	1	1	1	1	0	0	0	0	1	0	0	0	0	4	2	4	4	4	5	4	2	2	4	3	2	2	4	4	2	2	2
2021-06-23	42	1	1	6	4	stagiaire	5	2	1		2	2	2	2	2	2	1	1	1	1	1	1	0	0	0	0	1	0	0	0	0	2	2	2	4	4	4	2	2	2	4	4	2	2	3	3	2	2	2
2021-06-17	25	1	2	6	5	infirmiere	3	2	2		2	2	2	2	2	2	1	1	2	2	2	1	0	0	0	0	1	0	0	0	0	2	2	2	4	4	4	3	4	2	4	2	2	2	4	4	2	2	2
2021-06-17	25	1	2	6	5	infirmiere	2	2	2		2	2	2	2	2	2	1	1	1	2	2	1	0	0	0	0	1	0	0	0	0	2	2	2	4	4	4	2	2	2	4	2	2	2	4	4	2	2	2
2021-06-17	26	1	2	6	5	infirmiere	2	2	1		2	2	2	2	2	2	1	1	1	2	2	1	0	0	0	0	1	0	0	0	0	2	2	2	4	4	4	4	4	2	4	4	3	2	4	4	2	2	2
2021-06-10	22	2	2	6	5	infirmiere	5	3	2	2	2	2	1	2	2	2	1	1	1	1	1	1	0	0	0	0	1	0	0	0	0	2	2	2	4	4	4	4	4	2	4	4	3	3	4	4	4	2	2
2021-06-10	23	2	2	6	5	infirmiere	5	3	2	2	2	2	2	2	2	2	1	1	1	1	1	1	0	0	0	0	1	0	0	0	0	4	4	4	4	4	4	3	4	2	4	2	2	2	4	4	2	2	2
2021-06-16	26	1	2	6	5	medecin	5	3	2		2	2	2	2	2	1	1	2	1	1	2	1	0	0	0	0	1	0	0	0	0	2	2	2	4	4	4	4	4	2	4	2	2	2	4	4	2	2	2
2021-06-22	30	1	2	6	4	sagef	3	3	2		2	2	2	2	2	2	2	1	1	2	2	1	0	0	0	0	1	0	0	0	0	2	2	2	4	4	4	3	3	2	4	2	2	2	4	4	2	2	2
2021-06-24	23	1	2	6	5	stagiaire	3	3	2		2	2	2	2	2	2	1	1	1	2	2	1	0	0	0	0	1	0	0	0	0	2	2	2	4	4	4	3	3	2	4	2	2	2	4	4	2	2	2
2021-06-12	35	1	1	6	4	stagiaire	5	3	2		2	2	2	2	2	2	2	1	1	1	1	1	0	0	0	0	1	0	0	0	0	2	2	2	4	4	4	2	4	2	4	2	2	2	4	4	2	2	2
2021-06-24	32	2	1	6	5	stagiaire	6	3	1	2	2	2	2	2	2	1	1	1	1	2	2	1	0	0	0	0	1	0	0	0	0	4	4	4	4	4	3	4	3	2	4	2	2	2	4	4	4	2	2
2021-06-24	24	1	2	6	4	para	3	3	2		2	2	2	2	2	2	2	1	1	1	2	1	0	0	0	0	1	0	0	0	0	2	2	2	4	4	4	4	4	2	4	4	2	2	4	4	2	2	2
2021-06-17	22	2	1	6	5	ats	5	3	2	2	2	2	2	2	2	2	1	1	1	1	1	1	0	0	0	0	1	0	0	0	0	2	2	2	4	4	4	5	3	3	4	4	3	3	4	4	4	3	2
2021-06-17	21	2	2	6	5	infirmiere	6	3	1	2	2	2	2	2	2	2	1	1	1	2	2	1	0	0	0	0	1	0	0	0	0	2	2	2	4	4	4	4	3	3	3	4	2	2	4	4	4	3	2
2021-06-16	30	1	2	6	4	infirmiere	3	3	2		2	2	2	2	2	2	1	2	2	1	2	1	0	0	0	0	1	0	0	0	0	2	2	2	4	4	4	4	4	2	4	4	3	2	4	4	2	2	2
2021-06-24	27	1	2	6	5	pharma	4	4	1		2	2	2	2	2	2	1	1	1	1	1	1	0	0	0	0	1	0	0	0	0	2	2	2	4	4	4	3	3	3	3	4	3	3	4	4	2	3	2
2021-06-10	23	2	2	6	5	stagiaire	6	4	2	2	2	2	2	1	2	2	1	1	1	1	1	1	0	0	0	0	1	0	0	0	0	2	2	2	4	4	4	3	4	2	4	2	2	2	4	4	2	2	2
2021-06-10	22	1	2	6	5	infirmiere	7	4	2		2	2	2	2	2	2	1	1	1	1	1	1	0	0	0	0	1	0	0	0	0	4	4	4	4	4	4	3	4	4	4	4	4	2	4	4	2	2	3
2021-06-11	18	1	2	6	4	pharma	10	4	2		2	2	2	2	1	2	2	1	2	2	2	1	0	0	0	0	1	0	0	0	0	2	2	2	4	4	4	2	4	2	2	2	2	2	3	3	4	2	2
2021-06-17	22	1	2	6	5	stagiaire	9	5	2		2	2	2	2	2	2	1	1	1	2	2	1	0	0	0	0	1	0	0	0	0	2	2	2	4	4	4	2	2	2	4	2	2	2	4	4	2	2	2
2021-06-11	29	2	1	6	5	stagiaire	10	6	2	2	2	2	2	2	1	2	2	2	2	2	2	1	0	0	0	0	1	0	0	0	0	2	2	2	4	4	4	2	4	2	4	2	2	2	4	4	2	2	2
2021-06-23	25	1	2	6	4	sagef	10	6	2		2	2	2	2	2	1	2	1	2	2	2	1	0	0	0	0	1	0	0	0	0	4	2	4	4	4	4	4	2	2	4	4	2	2	4	4	4	2	3
2021-06-17	22	2	2	6	5	infirmiere	9	7	2	2	2	2	1	2	1	1	1	1	1	2	2	1	0	0	0	0	1	0	0	0	0	4	4	4	4	4	4	5	2	4	5	4	2	4	4	4	4	2	2
2021-06-17	21	1	2	6	5	infirmiere	15	7	2		2	2	1	2	1	2	1	1	1	2	2	1	0	0	0	0	1	0	0	0	0	4	2	4	4	4	4	5	4	4	4	4	2	2	4	4	2	2	2
2021-06-11	25	2	2	6	5	stagiaire	15	8	2	2	2	2	2	2	2	2	1	1	1	2	2	1	0	0	0	0	1	0	0	0	0	4	4	4	4	4	4	4	3	3	4	4	2	3	3	3	2	3	3
2021-06-22	20	2	2	6	5	medecin	7	4	2	2	2	2	2	2	2	2	1	1	1	2	2	1	1	0	0	0	1	0	0	0	0	2	2	2	4	4	4	4	4	3	4	4	3	3	4	4	2	3	2
2021-06-12	25	2	2	6	5	medecin	9	2	1	2	2	2	1	2	2	2	2	1	1	2	2	1	0	0	1	0	1	0	0	0	0	2	2	2	4	2	2	4	2	2	4	2	2	2	4	4	4	2	4
2021-06-17	27	2	1	6	5	para	3	2	2	2	2	2	1	2	1	2	1	1	1	2	2	1	0	0	1	0	1	0	0	0	0	4	2	4	4	4	4	5	4	4	4	4	2	2	4	4	2	2	2
2021-06-10	30	1	1	6	4	infirmiere	3	2	2		2	2	2	2	1	2	1	1	1	1	1	1	1	0	1	0	1	0	0	0	0	2	4	4	5	5	4	4	4	2	4	4	2	2	4	4	4	3	2
2021-06-22	35	1	1	6	4	medecin	3	2	2		2	2	1	2	2	2	1	1	1	1	1	1	1	0	1	0	1	0	0	0	0	2	2	2	4	4	4	4	5	2	2	4	2	4	5	5	4	2	2
2021-06-11	27	1	1	6	3	medecin	6	2	2		2	2	2	2	2	2	2	2	2	2	2	1	1	0	1	0	1	0	0	0	0	2	2	2	4	2	2	4	2	2	4	2	2	2	4	4	2	2	2
2021-06-11	37	1	1	6	4	medecin	5	3	2		2	2	2	2	2	1	1	1	1	1	2	1	1	0	1	0	1	0	0	0	0	2	2	2	4	4	4	4	4	2	4	4	2	2	4	4	4	4	4
2021-04-23	39	1	1	6	4	infirmiere	6	4	2		2	2	2	2	2	2	2	1	1	1	1	1	0	1	1	0	1	0	0	0	0	4	4	4	5	5	5	5	4	2	5	4	4	2	5	4	4	2	2
2021-06-12	37	1	2	6	4	stagiaire	12	12	2		2	2	2	2	2	2	1	1	1	1	1	1	0	0	0	1	1	0	0	0	0	2	2	2	4	4	4	2	4	2	4	2	2	2	4	4	4	2	2
2021-05-05	31	1	1	6	4	infirmiere	7	4	2		2	2	2	2	2	2	2	1	1	1	1	1	0	1	0	1	1	0	0	0	0	4	4	4	4	4	4	4	2	2	2	2	2	2	4	4	2	2	5
2021-06-01	24	2	1	6	5	medecin	2	2	1	2	2	2	2	2	2	2	2	2	1	1	2	1	0	0	1	1	1	0	0	0	0	2	4	2	5	5	4	4	4	2	2	4	2	1	4	4	2	2	4
2021-06-07	26	2	1	6	4	pharma	2	2	2	2	2	2	2	2	1	2	1	1	1	1	2	1	0	0	1	1	1	0	0	0	0	2	4	2	4	4	4	2	2	2	4	2	2	2	4	4	4	2	3
2021-06-11	22	2	2	6	3	sagef	5	3	2	2	2	2	2	2	2	2	1	1	1	2	2	1	0	0	1	1	1	0	0	0	0	2	2	2	4	4	4	4	4	2	4	4	2	4	4	4	2	2	2
2021-06-16	41	1	1	6	4	stagiaire	7	2	2		2	2	2	2	2	2	1	1	1	1	1	1	0	0	0	0	0	1	0	0	0	4	2	2	4	2	4	4	4	2	4	2	2	2	4	4	4	2	4
2021-06-11	42	1	1	6	4	ats	4	2	2		2	2	2	2	2	2	1	1	1	1	1	1	0	0	0	0	0	1	0	0	0	2	2	2	4	4	4	4	4	2	4	2	2	2	4	4	4	2	2
2021-06-22	30	2	1	6	5	medecin	8	5	2	2	2	2	2	2	1	2	2	2	1	1	2	1	0	0	0	0	0	1	0	0	0	2	2	2	4	4	4	4	3	3	4	4	3	3	4	4	4	3	3
2021-06-17	30	1	2	6	5	infirmiere	8	6	2		2	2	1	2	2	2	1	1	1	1	1	1	0	0	0	0	0	1	0	0	0	2	2	2	4	4	4	4	4	2	4	4	2	3	4	4	4	3	2
2021-06-24	32	2	1	6	5	medecin	8	8	2	2	2	2	2	2	2	2	1	1	1	1	1	1	0	0	0	0	0	1	0	0	0	2	2	2	4	4	4	4	3	3	3	4	3	3	4	4	4	3	2
2021-05-31	26	2	1	6	4	pharma	6	4	2	2	2	2	2	2	2	2	1	1	1	1	1	1	0	0	0	1	1	1	0	0	0	2	2	2	4	5	5	2	2	1	2	4	2	2	4	4	2	1	1
2021-06-24	22	1	2	6	5	infirmiere	1	1	2		2	2	2	2	1	2	1	1	1	1	2	1	0	0	0	0	0	0	1	0	0	3	4	2	4	4	4	2	2	2	2	2	2	2	4	4	4	2	2
2021-06-24	45	1	1	6	4	medecin	9	9	2		2	2	2	2	1	1	1	1	2	1	2	1	1	0	0	0	0	0	1	0	0	4	4	4	4	4	4	4	4	2	4	2	2	2	4	4	4	2	2
2021-06-12	24	2	2	6	4	labotech	6	6	2	2	2	2	2	2	2	2	2	2	2	2	2	1	0	0	1	0	0	0	1	0	0	4	4	4	4	4	4	5	4	2	5	4	4	2	4	4	2	2	2
2021-06-08	25	2	2	6	5	infirmiere	7	7	2	2	2	2	2	2	2	2	2	2	1	2	2	1	0	1	0	1	0	0	1	0	0	4	2	2	4	4	4	4	4	4	4	4	4	4	4	4	2	2	2
2021-06-22	36	1	1	6	4	medecin	4	2	2		2	2	2	2	2	2	1	1	1	1	1	1	1	0	0	0	1	0	1	0	0	2	2	2	5	5	4	4	4	2	4	2	2	2	4	4	2	2	2
2021-06-23	25	1	2	6	4	stagiaire	5	5	2		2	2	2	2	2	2	2	2	2	2	2	1	1	0	0	0	1	0	1	0	0	4	4	4	4	2	5	4	4	2	4	2	2	4	4	4	2	2	2
2021-05-27	35	2	2	6	5	ats	15	10	2	2	2	2	2	2	2	2	2	2	1	2	2	1	0	0	1	0	1	0	1	0	0	2	2	2	4	4	4	5	4	2	2	4	4	2	4	4	4	4	5
2021-06-24	41	1	1	6	4	ats	9	4	2		2	2	2	2	2	2	1	1	1	1	1	1	0	1	1	0	1	0	1	0	0	4	4	3	4	4	4	4	2	2	4	3	2	2	4	4	2	2	2
2021-06-24	27	1	2	6	4	infirmiere	17	5	2		2	2	2	2	2	2	1	1	1	1	2	1	0	1	1	0	1	0	1	0	0	2	2	2	4	4	4	4	4	2	4	4	3	3	4	4	4	2	2
2021-03-26	27	2	1	6	5	sagef	3	2	2	2	2	2	1	2	2	2	1	1	1	1	1	1	0	0	0	1	1	0	1	0	0	2	4	2	4	4	4	5	2	2	4	4	2	2	4	4	4	4	2
2021-06-22	30	1	1	6	5	sagef	3	2	2		2	2	2	2	2	2	1	1	1	1	1	1	0	0	0	0	0	0	0	1	0	2	2	2	4	4	4	4	3	3	4	4	4	3	4	4	4	3	2
2021-06-11	41	1	1	6	5	sagef	3	2	1		2	2	2	2	2	2	2	2	1	2	2	1	0	0	0	0	0	0	0	1	0	4	4	4	4	4	4	2	4	2	4	4	4	2	4	4	2	2	2
2021-06-22	27	2	1	6	5	sagef	3	2	2	2	2	2	2	2	2	2	1	2	2	2	2	1	0	0	0	0	0	0	0	1	0	4	4	4	4	4	4	4	3	3	4	4	3	4	4	4	2	3	2
2021-06-22	23	2	2	6	5	ats	4	2	2	2	2	2	2	2	2	2	1	2	1	2	2	1	0	0	0	0	0	0	0	1	0	2	2	2	2	4	4	2	3	3	2	4	3	3	4	4	2	3	2
2021-06-24	25	2	1	6	5	infirmiere	3	2	2	2	2	2	2	2	2	2	1	1	1	2	2	1	0	0	0	0	0	0	0	1	0	2	2	2	4	4	3	2	3	2	2	2	2	2	4	4	2	2	2
2021-06-24	32	2	1	6	5	infirmiere	3	2	2	2	2	2	2	2	2	2	1	1	1	2	2	1	0	0	0	0	0	0	0	1	0	2	2	2	4	4	3	3	2	2	4	2	2	2	4	4	2	2	2
2021-06-12	24	1	2	6	5	infirmiere	7	3	1		2	2	2	2	2	2	2	1	1	1	2	1	0	0	0	0	0	0	0	1	0	4	4	4	4	2	4	4	4	4	4	4	4	2	4	4	3	2	2
2021-06-24	22	1	2	6	5	infirmiere	3	3	2		2	2	2	2	2	2	1	1	1	2	2	1	0	0	0	0	0	0	0	1	0	2	2	2	4	4	3	3	3	2	2	2	2	2	4	4	2	2	2
2021-06-24	22	1	2	6	5	pharma	6	4	2		2	2	2	2	2	2	1	1	1	2	2	1	0	0	0	0	0	0	0	1	0	4	4	4	4	4	3	2	2	2	2	2	2	2	4	4	2	2	2
2021-06-11	22	2	2	6	5	infirmiere	10	5	2	2	2	2	2	2	2	2	1	1	1	2	2	1	0	0	0	0	0	0	0	1	0	4	4	4	4	4	4	4	2	2	4	4	4	4	4	4	4	4	2
2021-06-22	28	2	1	6	5	stagiaire	22	8	2	2	2	2	2	2	2	2	1	1	1	2	2	1	0	0	0	0	0	0	0	1	0	2	2	2	4	4	4	4	4	3	4	4	3	3	4	4	2	3	2
2021-06-11	40	1	1	6	4	sagef	9	4	2		2	2	1	2	2	1	1	1	1	1	1	1	1	0	0	0	0	0	0	1	0	2	2	2	4	4	4	4	4	2	2	4	2	2	4	4	4	2	2
2021-06-10	56	2	1	6	5	infirmiere	8	6	2	2	2	2	2	2	1	2	1	1	1	1	1	1	1	0	0	0	0	0	0	1	0	2	2	2	4	4	4	2	2	2	2	2	2	2	4	4	2	2	2
2021-06-17	22	2	1	6	5	infirmiere	5	2	1	2	2	2	1	2	2	2	1	1	1	1	1	1	1	0	1	0	0	0	0	1	0	2	2	2	4	4	4	4	4	2	4	4	4	2	4	4	2	2	2
2021-06-24	32	2	1	6	5	pharma	10	6	1	2	2	2	2	2	2	2	1	1	1	2	2	1	0	1	1	0	0	0	0	1	0	2	2	2	4	4	4	4	2	2	4	2	2	2	4	4	2	2	2
2021-06-12	33	2	1	6	5	sagef	1	1	2	2	2	2	2	2	1	2	1	1	1	2	2	1	0	0	0	1	0	0	0	1	0	2	2	2	4	4	4	4	2	2	4	3	2	2	4	4	2	2	3
2021-06-24	47	1	1	6	4	medecin	7	4	2		2	2	2	2	1	1	1	1	1	1	1	1	0	1	0	1	0	0	0	1	0	4	4	4	4	4	4	4	5	2	4	4	2	2	4	4	2	4	2
2021-06-11	44	1	1	6	4	sagef	27	7	2		2	2	1	2	2	1	1	2	1	2	2	1	0	0	1	1	0	0	0	1	0	2	2	2	4	4	4	2	2	2	2	2	2	2	4	4	4	2	4
2021-06-24	35	2	1	6	5	infirmiere	12	7	2	2	2	2	2	2	2	2	1	1	1	2	2	1	0	0	0	0	1	0	0	1	0	2	2	2	4	4	3	4	3	2	4	2	2	2	4	3	2	2	2
2021-06-11	27	1	1	6	4	medecin	4	2	1		2	2	1	2	2	1	2	1	1	1	1	1	0	0	1	0	1	0	0	1	0	4	4	4	4	4	4	4	2	4	4	2	2	2	4	4	2	4	4
2021-06-24	49	2	1	6	5	pharma	10	6	2	2	2	2	2	2	2	2	1	1	1	1	1	1	0	0	1	0	1	0	0	1	0	4	4	4	4	4	4	5	3	3	3	4	3	3	4	4	4	4	2
2021-06-24	27	2	2	6	5	medecin	13	7	2	2	2	2	1	2	2	2	1	1	1	2	2	1	0	0	1	0	1	0	0	1	0	2	2	2	4	4	4	4	4	4	5	3	4	4	4	4	4	2	2
2021-06-23	53	1	1	6	4	medecin	5	3	2		1	1	2	2	2	2	1	1	1	2	2	1	0	0	1	0	1	1	0	1	0	3	4	4	4	4	4	4	2	2	2	4	2	2	4	4	2	2	2
2021-06-23	42	1	1	6	4	biologiste	8	5	1		2	2	2	2	2	2	1	1	1	1	1	1	0	0	1	0	1	1	0	1	0	2	2	2	4	4	4	4	4	2	5	3	2	2	4	4	4	2	3
2021-05-20	29	1	2	6	4	biologiste	8	4	2		2	2	2	2	2	2	1	1	1	1	2	1	0	1	1	0	0	0	0	0	1	4	4	4	4	4	2	2	4	2	2	4	2	2	5	4	2	2	2
2021-05-31	27	2	2	6	4	pharma	6	4	2	2	2	2	2	1	1	2	1	1	1	1	1	1	0	0	0	1	0	1	0	0	1	1	2	2	5	4	4	2	2	1	2	2	1	1	4	4	1	4	1
2021-06-11	47	2	1	6	4	biologiste	7	5	2	2	2	2	2	2	2	2	1	1	2	1	1	1	0	0	0	0	0	0	0	1	1	2	2	2	4	4	4	4	4	2	4	4	4	2	3	4	4	2	2
2021-06-11	60	1	1	6	4	infirmiere	10	6	1		2	2	2	2	2	1	1	1	1	1	1	1	0	0	0	0	1	0	0	1	1	2	2	2	4	4	4	5	4	2	2	4	2	2	2	2	4	2	2
2021-06-11	30	1	2	6	4	infirmiere	1	1	1		2	2	2	2	2	2	1	1	2	1	2	2	0	0	0	0	0	0	0	0	0	4	4	4	4	4	4	2	2	2	4	2	2	2	2	2	2	2	4
2021-06-24	25	1	2	6	5	infirmiere	1	1	1		2	2	2	2	2	2	2	1	1	2	2	2	0	0	0	0	0	0	0	0	0	2	2	2	4	4	4	4	4	3	3	4	4	3	3	3	2	3	2
2021-06-10	20	2	2	6	5	infirmiere	5	1	2	2	2	2	2	2	2	2	1	1	1	2	2	2	0	0	0	0	0	0	0	0	0	4	4	4	4	4	4	4	4	4	4	3	3	3	4	4	4	2	2
2021-06-11	27	1	2	6	5	infirmiere	3	1	2		2	2	2	2	2	1	2	2	2	2	2	2	0	0	0	0	0	0	0	0	0	2	2	2	4	4	4	2	4	2	4	2	2	2	3	4	2	3	2
[truncated: 1,325 more rows]
[truncated: 20 more columns]
